# Supplementary material for: Intra-population genomic diversity of the bloom-forming cyanobacterium, Aphanizomenon gracile, at low spatial scale
Source: PubMed Central journal article supplement (PMC10244403; doi:10.1038/s43705-023-00263-3), 2023-06-07
Supplement: 43705_2023_263_MOESM3_ESM.pdf [file 43705_2023_263_MOESM3_ESM.pdf]

| COG-ID | EggNog Seed Ortholog | E-value   | Score | Gene name | COG category |
|--------|----------------------|-----------|-------|-----------|--------------|
| OG001  | 46234.ANA_C20002     | 3.93e-176 | 492.0 | dtd3      | L            |
| OG002  | 46234.ANA_C10916     | 1.15e-134 | 384.0 | plsY      | I            |
| OG003  | 551115.Aazo_2954     | 1.17e-152 | 430.0 | clpP      | O            |
| OG004  | 46234.ANA_C10404     | 5.81e-75  | 226.0 | petE      | C            |
| OG005  | 46234.ANA_C12175     | 5.45e-94  | 274.0 | sll0832   | L            |
| OG006  | 46234.ANA_C13573     | 1.98e-105 | 306.0 | frr       | J            |
| OG007  | 46234.ANA_C10331     | 4.85e-139 | 394.0 | plsC      | I            |
| OG008  | 46234.ANA_C20443     | 2.52e-52  | 165.0 | -         | S            |
| OG009  | 46234.ANA_C10614     | 1.97e-124 | 354.0 | petC      | C            |
| OG010  | 46234.ANA_C11579     | 2.69e-117 | 336.0 | pyrR      | F            |
| OG011  | 46234.ANA_C11673     | 5.46e-62  | 190.0 | minE      | D            |
| OG012  | 46234.ANA_C12467     | 2.09e-55  | 173.0 | ycf19     | S            |
| OG013  | 46234.ANA_C12453     | 5.26e-44  | 143.0 | sipA      | S            |
| OG014  | 46234.ANA_C20036     | 2.37e-175 | 489.0 | rps2      | J            |
| OG015  | 46234.ANA_C20048     | 1.14e-148 | 419.0 | hisI      | E            |
| OG016  | 46234.ANA_C12592     | 1.55e-79  | 238.0 | -         | S            |
| OG017  | 46234.ANA_C11179     | 5.46e-93  | 273.0 | rpl9      | J            |
| OG018  | 46234.ANA_C20574     | 0.0       | 914.0 | murE      | M            |
| OG019  | 46234.ANA_C13686     | 1.48e-221 | 612.0 | gshB      | H            |
| OG020  | 46234.ANA_C10078     | 5.41e-151 | 427.0 | -         | C            |
| OG021  | 56107.Cylst_3698     | 3.58e-68  | 208.0 | -         | S            |
| OG022  | 46234.ANA_C11594     | 7.87e-246 | 677.0 | leuB      | CE           |
| OG023  | 46234.ANA_C11357     | 1.66e-125 | 358.0 | txlA      | CO           |
