# Supplementary material for: Intra-population genomic diversity of the bloom-forming cyanobacterium, Aphanizomenon gracile, at low spatial scale
Source: PubMed Central journal article supplement (PMC10244403; doi:10.1038/s43705-023-00263-3), 2023-06-07
Supplement: 43705_2023_263_MOESM4_ESM.pdf [file 43705_2023_263_MOESM4_ESM.pdf]

| BGC       | Best hit from Antismash between 'Known Cluster Blast' and 'MiBIG comparison' - Score (%) |                                         |                                       |                                    | Putative product        | Corresponding Annotated Analyte<br>(Metaboscape/GNPS) | Analyte detection |           |           |           | Label in Figure 1.d     |
|-----------|------------------------------------------------------------------------------------------|-----------------------------------------|---------------------------------------|------------------------------------|-------------------------|-------------------------------------------------------|-------------------|-----------|-----------|-----------|-------------------------|
|           | PMC627.10                                                                                | PMC638.10                               | PMC644.10                             | PMC649.10                          |                         |                                                       | PMC627.10         | PMC638.10 | PMC644.10 | PMC649.10 |                         |
| NRPS_1    | xenotetrapeptide - 65%                                                                   |                                         | shinorine - 69%                       | curacomycin - 64%                  | ?                       | -                                                     |                   |           |           |           | NRPS -                  |
| NRPS_2    | anabaenopeptin - 100%                                                                    | anabaenopeptin - 100%                   | anabaenopeptin - 100%                 |                                    | Anabaenopeptin          | -                                                     |                   |           |           |           | Anabaenopeptin-like     |
| NRPS_3    |                                                                                          | anabaenopeptin - 100%                   |                                       |                                    | Anabaenopeptin          | -                                                     |                   |           |           |           | Anabaenopeptin-like     |
| NRPS_4    |                                                                                          | shinorine/mycosporine<br>glycine - 70%  |                                       |                                    | shinorine/mycosporine   | Mycosporine-lysine                                    |                   | X         |           |           | Shinorine/mycosporine   |
| NRPS_5    |                                                                                          | hexose-shinorine - 64%                  |                                       |                                    | Hexose-shinorine        | -                                                     |                   |           |           |           | Shinorine/mycosporine   |
| NRPS_6    |                                                                                          | minutissamide/puwainaphycin<br>n - 100% | minutissamide/puwainaphycin -<br>100% | minutissamide/puwainaphycin - 100% | puwainaphycin           | Minutissamide/Puwainaphycin                           |                   | X         | X         | X         | Puwainaphycin           |
| NRPS_7    | lincomycin - 58%                                                                         | lincomycin - 57%                        | lincomycin - 58%                      | lincomycin - 58%                   | lincomycin              | -                                                     |                   |           |           |           | NRPS -                  |
| NRPS/PKS  | Saxitoxin - 58%                                                                          | Saxitoxin - 58%                         |                                       |                                    | saxitoxin               | Saxitoxin                                             | X                 | X         |           |           | Saxitoxin               |
| PKS_1     |                                                                                          |                                         |                                       | heterocyst glycolipids - 57%       |                         |                                                       |                   |           |           |           | Heterocyst glycolipids  |
| PKS_2     | heterocyst glycolipids - 85%                                                             | heterocyst glycolipids - 85%            | heterocyst glycolipids - 85%          | heterocyst glycolipids - 85%       | heterocyst glycolipids  | Heterocyst glycolipids                                | X                 | X         | X         | X         | Heterocyst glycolipids  |
| PKS_3     | heterocyst glycolipids - 57%                                                             | heterocyst glycolipids - 57%            | heterocyst glycolipids - 57%          |                                    |                         |                                                       |                   |           |           |           | Heterocyst glycolipids  |
| PKS_4     | 1-heptadecene - 52%                                                                      |                                         |                                       | 1-heptadecene/1-nonadecene - 52%   | heptadecene             | -                                                     |                   |           |           |           | PKS -                   |
| RIPPs_1   | heme D1 - 55%                                                                            | heme 1 - 55%                            | heme D1 - 55%                         | heme D1 - 55%                      | heme D1                 | -                                                     |                   |           |           |           | RIPP -                  |
| RIPPs_2   | prenylgaramide B/C - 49%                                                                 | prenylgaramide B/C - 49%                | prenylgaramide B/C - 49%              | prenylgaramide B/C - 49%           | prenylgaramide          | -                                                     |                   |           |           |           | RIPP -                  |
| RIPPs_4   | anacyclamide A10 - 85%                                                                   | anacyclamide A10 - 81%                  | anacyclamide A10 - 92%                | anacyclamide A10 - 92%             | anacyclamide            | -                                                     |                   |           |           |           | Anacyclamide-like       |
| RIPPs_5   | curacozole - 48%                                                                         | curacozole - 48%                        | curacozole - 58%                      | curacozole - 58%                   | curacozole              | -                                                     |                   |           |           |           | RIPP -                  |
| RIPPs_3   | carotenoid - 49%                                                                         |                                         |                                       |                                    |                         |                                                       |                   |           |           |           | Carotenoid              |
| Terpene_1 |                                                                                          | carotenoid - 65%                        |                                       |                                    | carotenoid              | Carotenoid                                            | X                 | X         | X         | X         | Carotenoid              |
| Terpene_2 | carotenoid - 65%                                                                         |                                         | carotenoid - 65%                      | carotenoid - 65%                   |                         |                                                       |                   |           |           |           | Carotenoid              |
| Terpene_3 | hopene - 41%                                                                             | hopene - 41%                            | hopene - 41%                          | hopene - 41%                       | hopene                  | -                                                     |                   |           |           |           | Terpene -               |
| Terpene_4 | bryostatin - 37%                                                                         | fosfomycin - 36%                        | capsular polysaccharide - 43%         | capsular polysaccharide - 43%      | Capsular polysaccharide | Capsular polysaccharide                               | X                 | X         | X         | X         | Capsular polysaccharide |
| Others_5  | ?                                                                                        | ?                                       |                                       |                                    | ?                       | -                                                     |                   |           |           |           | Other -                 |

X:see Metaboscape\_Analysis Page

X:see Figure S2-GNPS network
