# Supplementary material for: Intra-population genomic diversity of the bloom-forming cyanobacterium, Aphanizomenon gracile, at low spatial scale
Source: PubMed Central journal article supplement (PMC10244403; doi:10.1038/s43705-023-00263-3), 2023-06-07
Supplement: 43705_2023_263_MOESM5_ESM.pdf [file 43705_2023_263_MOESM5_ESM.pdf]

| FEATURE_ID | Retention Time | PEPMASS    | SIGMA SCORE | NAME_METABOSCAPE                                   | MOLECULAR_FORMULA | ADDUCT                    | CAS | Mean Count |           |           |           |
|------------|----------------|------------|-------------|----------------------------------------------------|-------------------|---------------------------|-----|------------|-----------|-----------|-----------|
|            |                |            |             |                                                    |                   |                           |     | PMC627.10  | PMC638.10 | PMC644.10 | PMC649.10 |
| 752        | 188.59         | 316.16325  | 15.249      | Mycosporine-lysine                                 | C14H24N2O6        | ION=[M+H] <sup>+</sup>    |     | 0.00       | 2520.67   | 0.00      | 0.00      |
| 1674       | 633.77         | 1236.739   | 18.402      | Minutissamide K                                    | C58H100N12O17     | ION=[M+H] <sup>+</sup>    |     | 0.00       | 6696.17   | 26697.67  | 74906.33  |
| 1682       | 636.18         | 1198.63129 | 8.713       | Minutissamide J                                    | C54H91CIN12O16    | ION=[M+H+H] <sup>2+</sup> |     | 0.00       | 10948.33  | 7320.50   | 0.00      |
| 1697       | 639.13         | 1234.72424 | 26.304      | Minutissamide I                                    | C58H98N12O17      | ION=[M+H] <sup>+</sup>    |     | 0.00       | 4670.67   | 9118.23   | 139117.33 |
| 3064       | 586.1          | 1250.74376 | 12.549      | Minutissamide G                                    | C59H102N12O17     | ION=[M+H+H] <sup>2+</sup> |     | 0.00       | 3674.33   | 2878.67   | 1463.67   |
| 3114       | 635.73         | 1236.72942 | 5.72        | Minutissamide K                                    | C58H100N12O17     | ION=[M+H] <sup>+</sup>    |     | 0.00       | 2267.33   | 1750.00   | 43714.00  |
| 3124       | 643.9          | 1212.64743 | 25.538      | Minutissamide F                                    | C55H93CIN12O16    | ION=[M+H+H] <sup>2+</sup> |     | 0.00       | 6342.67   | 4235.83   | 0.00      |
| 3144       | 661.76         | 1212.64898 | 13.738      | Minutissamide F                                    | C55H93CIN12O16    | ION=[M+H+H] <sup>2+</sup> |     | 0.00       | 7076.67   | 11883.33  | 0.00      |
| 3167       | 683.44         | 1212.64982 | 30.931      | Minutissamide F                                    | C55H93CIN12O16    | ION=[M+H+H] <sup>2+</sup> |     | 0.00       | 23615.33  | 12552.17  | 0.00      |
| 3153       | 669.01         | 1226.66066 | 16.475      | Puwainaphycin C                                    | C56H95CIN12O16    | ION=[M+H+H] <sup>2+</sup> |     | 0.00       | 3728.50   | 5897.17   | 0.00      |
| 3180       | 693.04         | 1226.66199 | 10.569      | Puwainaphycin C                                    | C56H95CIN12O16    | ION=[M+H+H] <sup>2+</sup> |     | 0.00       | 64847.50  | 280568.50 | 0.00      |
| 3181       | 692.87         | 1226.67435 | 6.993       | Puwainaphycin C                                    | C56H95CIN12O16    | ION=[M+H] <sup>+</sup>    |     | 0.00       | 5079.17   | 40494.33  | 35.33     |
| 1904       | 715.99         | 1224.68254 | 14.068      | Puwainaphycin D                                    | C57H97CIN12O15    | ION=[M+H+H] <sup>2+</sup> |     | 0.00       | 37995.33  | 149509.00 | 0.00      |
| 1911       | 721.28         | 1192.70283 | 10.615      | Puwainaphycin E                                    | C56H96N12O16      | ION=[M+H+H] <sup>2+</sup> |     | 0.00       | 3794.17   | 45124.17  | 340.33    |
| 26         | 42.94          | 299.1338   | 5.856       | Saxitoxin                                          | C10H17N7O4        | ION=[M+H] <sup>+</sup>    |     | 5120.31    | 15190.00  | 0.00      | 0.00      |
| 2228       | 40             | 315.12673  | 7.651       | 11 <sup>?</sup> -hydroxysaxitoxin                  | C10H17N7O5        | ION=[M+H+H] <sup>2+</sup> |     | 9512.46    | 30772.83  | 0.00      | 0.00      |
| 2231       | 40.95          | 315.12937  | 2.638       | 11 <sup>?</sup> -hydroxysaxitoxin                  | C10H17N7O5        | ION=[M+H] <sup>+</sup>    |     | 12956.15   | 44931.67  | 0.00      | 0.00      |
| 1          | 30.83          | 371.90073  |             |                                                    |                   | ION=[M+H+H] <sup>2+</sup> |     | 5797.23    | 5354.33   | 6766.83   | 2026.00   |
| 2          | 32.96          | 198.98241  |             |                                                    |                   | ION=[M+H] <sup>+</sup>    |     | 7166.15    | 6505.17   | 6254.00   | 5625.00   |
| 3          | 34.02          | 226.97712  |             |                                                    |                   | ION=[M+H] <sup>+</sup>    |     | 4950.77    | 4670.00   | 4395.67   | 3808.33   |
| 4          | 34.19          | 315.90779  |             |                                                    |                   | ION=[M+H+H] <sup>2+</sup> |     | 0.00       | 5501.17   | 5360.00   | 0.00      |
| 5          | 35.69          | 223.12228  | 8.552       | Tetrahydroindol 3                                  | C12H17NO3         | ION=[M+H] <sup>+</sup>    |     | 4207.08    | 4312.17   | 4249.83   | 1624.00   |
| 6          | 36.88          | 164.57135  |             |                                                    |                   | ION=[M+H] <sup>+</sup>    |     | 169.69     | 624.33    | 0.00      | 0.00      |
| 7          | 37.2           | 501.3573   |             |                                                    |                   | ION=[M+H+H] <sup>2+</sup> |     | 11.54      | 18.17     | 425.67    | 0.00      |
| 8          | 38.27          | 159.17416  | 4.535       | Dimethyldipropylenetriamine                        | C8H21N3           | ION=[M+H] <sup>+</sup>    |     | 3182.62    | 8292.33   | 4787.33   | 6500.33   |
| 9          | 39.62          | 430.47514  |             |                                                    |                   | ION=[M+H+H] <sup>2+</sup> |     | 0.00       | 2361.33   | 0.00      | 266.00    |
| 10         | 40.39          | 215.23747  |             |                                                    |                   | ION=[M+H] <sup>+</sup>    |     | 0.00       | 1405.67   | 0.00      | 0.00      |
| 11         | 40.8           | 157.56341  |             |                                                    |                   | ION=[M+H] <sup>+</sup>    |     | 1032.62    | 968.83    | 0.00      | 0.00      |
| 12         | 41.28          | 215.20122  |             |                                                    |                   | ION=[M+H] <sup>+</sup>    |     | 440.31     | 169.83    | 30581.00  | 370.00    |
| 13         | 41.49          | 270.24191  |             |                                                    |                   | ION=[M+H+H] <sup>2+</sup> |     | 117.23     | 0.00      | 7003.50   | 13.00     |
| 14         | 41.49          | 151.5982   |             |                                                    |                   | ION=[M+H] <sup>+</sup>    |     | 131.69     | 0.00      | 2713.17   | 63.00     |
| 15         | 41.52          | 134.62192  |             |                                                    |                   | ION=[M+H] <sup>+</sup>    |     | 0.00       | 0.00      | 3206.67   | 0.00      |
| 16         | 41.52          | 317.21206  |             |                                                    |                   | ION=[M+H+H] <sup>2+</sup> |     | 5066.77    | 0.00      | 449.33    | 22.67     |
| 17         | 41.76          | 249.15158  | 11.994      | Benzocetamine                                      | C18H19N           | ION=[M+H] <sup>+</sup>    |     | 50.92      | 0.00      | 3972.83   | 0.00      |
| 18         | 41.88          | 241.25266  |             |                                                    |                   | ION=[M+H] <sup>+</sup>    |     | 0.00       | 0.00      | 0.00      | 81234.00  |
| 19         | 41.89          | 156.16188  |             |                                                    |                   | ION=[M+H] <sup>+</sup>    |     | 0.00       | 26.83     | 3358.67   | 269.33    |
| 20         | 41.91          | 275.62637  |             |                                                    |                   | ION=[M+H] <sup>+</sup>    |     | 50.31      | 1267.17   | 341.17    | 0.00      |
| 21         | 42.06          | 201.22168  | 7.9         | Ethyl(3-[[3-(propylamino)propyl]amino]propyl)amine | C11H27N3          | ION=[M+H] <sup>+</sup>    |     | 6789.85    | 5624.33   | 6151.50   | 11053.00  |
| 22         | 42.15          | 444.30436  |             |                                                    |                   | ION=[M+H+H] <sup>2+</sup> |     | 1492.92    | 738.50    | 998.83    | 509.00    |
| 23         | 42.22          | 187.20603  |             |                                                    |                   | ION=[M+H] <sup>+</sup>    |     | 16147.85   | 1309.17   | 90940.67  | 36969.67  |
| 24         | 42.42          | 208.19537  |             |                                                    |                   | ION=[M+H] <sup>+</sup>    |     | 0.00       | 0.00      | 0.00      | 4523.33   |
| 25         | 42.86          | 356.1558   |             |                                                    |                   | ION=[M+H+H] <sup>2+</sup> |     | 0.00       | 5167.33   | 0.00      | 0.00      |
| 27         | 42.99          | 445.96545  |             |                                                    |                   | ION=[M+H+H] <sup>2+</sup> |     | 1323.23    | 0.00      | 0.00      | 0.00      |
| 28         | 43             | 295.29797  |             |                                                    |                   | ION=[M+H] <sup>+</sup>    |     | 0.00       | 0.00      | 0.00      | 132189.33 |
| 29         | 43.06          | 149.56571  |             |                                                    |                   | ION=[M+H] <sup>+</sup>    |     | 2053.85    | 5566.33   | 0.00      | 0.00      |
| 30         | 43.1           | 338.14007  |             |                                                    |                   | ION=[M+H+H] <sup>2+</sup> |     | 908.15     | 2516.17   | 0.00      | 0.00      |
| 31         | 43.33          | 178.07828  |             |                                                    |                   | ION=[M+H] <sup>+</sup>    |     | 2639.08    | 3590.00   | 10.33     | 0.00      |
| 32         | 43.33          | 415.69423  |             |                                                    |                   | ION=[M+H+H] <sup>2+</sup> |     | 0.00       | 1048.50   | 0.00      | 0.00      |
| 33         | 43.51          | 312.32422  |             |                                                    |                   | ION=[M+H+H] <sup>2+</sup> |     | 0.00       | 93.00     | 3031.00   | 1603.33   |
| 34         | 43.7           | 551.25244  |             |                                                    |                   | ION=[M+H+H] <sup>2+</sup> |     | 4.77       | 1062.50   | 0.00      | 0.00      |
| 35         | 43.73          | 243.12965  |             |                                                    |                   | ION=[M+H+H] <sup>2+</sup> |     | 110.15     | 5941.00   | 651.00    | 35.67     |
| 36         | 43.75          | 831.51902  |             |                                                    |                   | ION=[M+H+H] <sup>2+</sup> |     | 0.00       | 1833.33   | 0.00      | 0.00      |
| 37         | 43.84          | 329.24909  |             |                                                    |                   | ION=[M+H+H] <sup>2+</sup> |     | 419.38     | 0.00      | 0.00      | 0.00      |
| 38         | 43.97          | 207.84722  |             |                                                    |                   | ION=[M+H] <sup>+</sup>    |     | 16.77      | 2620.17   | 288.83    | 0.00      |
| 39         | 44             | 280.13095  |             |                                                    |                   | ION=[M+H] <sup>+</sup>    |     | 375.69     | 12287.00  | 1964.83   | 22.00     |
| 40         | 44.07          | 208.09812  | NA          | Neocuproine                                        | C14H12N2          | ION=[M+H] <sup>+</sup>    |     | 40.92      | 1794.33   | 154.50    | 0.00      |
| 41         | 44.07          | 171.41895  |             |                                                    |                   | ION=[M+H] <sup>+</sup>    |     | 25.54      | 1176.50   | 281.50    | 0.00      |
| 42         | 44.07          | 283.13748  |             |                                                    |                   | ION=[M+H] <sup>+</sup>    |     | 1563.38    | 3608.50   | 12.33     | 55.00     |
| 43         | 44.07          | 853.35382  |             |                                                    |                   | ION=[M+H+H] <sup>2+</sup> |     | 32.62      | 3114.67   | 248.33    | 0.00      |
| 44         | 44.11          | 467.911    |             |                                                    |                   | ION=[M+H+H] <sup>2+</sup> |     | 1304.31    | 1315.33   | 1361.17   | 0.00      |
| 45         | 44.25          | 164.62384  |             |                                                    |                   | ION=[M+H] <sup>+</sup>    |     | 2581.69    | 0.00      | 0.00      | 11.67     |
| 46         | 44.25          | 241.99402  |             |                                                    |                   | ION=[M+H] <sup>+</sup>    |     | 2502.77    | 4038.83   | 5447.17   | 0.00      |
| 47         | 44.33          | 435.95461  |             |                                                    |                   | ION=[M+H+H] <sup>2+</sup> |     | 0.00       | 0.00      | 419.00    | 0.00      |
| 48         | 44.35          | 318.24556  |             |                                                    |                   | ION=[M+H] <sup>+</sup>    |     | 108.46     | 0.00      | 11399.50  | 0.00      |
| 49         | 44.4           | 582.23566  |             |                                                    |                   | ION=[M+H+H] <sup>2+</sup> |     | 0.00       | 2397.50   | 391.50    | 0.00      |
| 50         | 44.72          | 155.6458   |             |                                                    |                   | ION=[M+H] <sup>+</sup>    |     | 0.00       | 0.00      | 3833.83   | 0.00      |
| 51         | 44.74          | 186.17414  |             |                                                    |                   | ION=[M+H] <sup>+</sup>    |     | 4398.15    | 18.50     | 181.33    | 0.00      |
| 52         | 44.82          | 227.23694  |             |                                                    |                   | ION=[M+H] <sup>+</sup>    |     | 0.00       | 0.00      | 6.67      | 6037.00   |
| 53         | 45.58          | 186.75424  |             |                                                    |                   | ION=[M+H] <sup>+</sup>    |     | 0.00       | 632.00    | 107.50    | 0.00      |
| 54         | 46.05          | 486.26247  |             |                                                    |                   | ION=[M+H+H] <sup>2+</sup> |     | 50.46      | 1198.67   | 344.67    | 0.00      |
| 55         | 46.16          | 314.30486  |             |                                                    |                   | ION=[M+H] <sup>+</sup>    |     | 4604.31    | 628.50    | 22557.67  | 29.67     |

|     |       |            |        |                                                                                                  |            |                           |             |          |          |          |          |
|-----|-------|------------|--------|--------------------------------------------------------------------------------------------------|------------|---------------------------|-------------|----------|----------|----------|----------|
| 56  | 46.17 | 1031.52319 |        |                                                                                                  |            | ION=[M+H] <sup>+</sup>    |             | 186.31   | 1607.33  | 0.00     | 0.00     |
| 57  | 47.44 | 286.27356  |        |                                                                                                  |            | ION=[M+H] <sup>+</sup>    |             | 20.77    | 9.00     | 5030.67  | 0.00     |
| 58  | 47.44 | 174.11111  | 5.273  | Arginine                                                                                         | C6H14N4O2  | ION=[M+H] <sup>+</sup>    |             | 4936.77  | 4893.33  | 5235.33  | 1102.33  |
| 59  | 48.25 | 847.77458  |        |                                                                                                  |            | ION=[M+H+H] <sup>2+</sup> |             | 0.00     | 0.00     | 464.83   | 0.00     |
| 60  | 48.53 | 219.92811  |        |                                                                                                  |            | ION=[M+H] <sup>+</sup>    |             | 2218.77  | 3075.33  | 3112.33  | 316.33   |
| 61  | 48.93 | 1621.27569 |        |                                                                                                  |            | ION=[M+H+H] <sup>2+</sup> |             | 0.00     | 510.83   | 0.00     | 0.00     |
| 62  | 49.05 | 770.64688  |        |                                                                                                  |            | ION=[M+H] <sup>+</sup>    |             | 1868.92  | 2301.00  | 708.83   | 1401.33  |
| 63  | 49.09 | 198.18614  | 13.173 | Guanethidine                                                                                     | C10H22N4   | ION=[M+H] <sup>+</sup>    |             | 39.08    | 16.17    | 0.00     | 14392.33 |
| 64  | 49.19 | 1639.23725 |        |                                                                                                  |            | ION=[M+H+H] <sup>2+</sup> |             | 797.08   | 2042.33  | 0.00     | 325.33   |
| 65  | 49.27 | 915.61605  |        |                                                                                                  |            | ION=[M+H] <sup>+</sup>    |             | 2298.46  | 1738.33  | 2188.50  | 5315.67  |
| 66  | 49.45 | 121.91658  |        |                                                                                                  |            | ION=[M+H] <sup>+</sup>    |             | 54222.92 | 62759.83 | 51835.17 | 91930.33 |
| 67  | 49.49 | 812.62886  |        |                                                                                                  |            | ION=[M+H] <sup>+</sup>    |             | 1950.15  | 2762.83  | 427.17   | 1841.33  |
| 68  | 49.57 | 831.6532   |        |                                                                                                  |            | ION=[M+H] <sup>+</sup>    |             | 2857.54  | 2281.67  | 2842.50  | 6597.33  |
| 69  | 49.63 | 695.68568  |        |                                                                                                  |            | ION=[M+H] <sup>+</sup>    |             | 417.69   | 66.33    | 730.50   | 4889.33  |
| 70  | 49.66 | 733.80601  |        |                                                                                                  |            | ION=[M+H] <sup>+</sup>    |             | 560.15   | 1480.83  | 1173.17  | 0.00     |
| 71  | 50.08 | 1031.53436 |        |                                                                                                  |            | ION=[M+H] <sup>+</sup>    |             | 1276.46  | 2647.17  | 0.00     | 0.00     |
| 72  | 50.08 | 896.59291  |        |                                                                                                  |            | ION=[M+H] <sup>+</sup>    |             | 1440.00  | 2273.00  | 351.33   | 699.00   |
| 73  | 50.14 | 854.60934  |        |                                                                                                  |            | ION=[M+H] <sup>+</sup>    |             | 1282.92  | 2502.00  | 479.33   | 1075.67  |
| 74  | 50.36 | 997.56664  |        |                                                                                                  |            | ION=[M+H] <sup>+</sup>    |             | 232.15   | 2199.67  | 85.17    | 332.33   |
| 75  | 50.4  | 531.41419  |        |                                                                                                  |            | ION=[M+H+H] <sup>2+</sup> |             | 7143.54  | 0.00     | 535.83   | 0.00     |
| 76  | 50.7  | 334.26663  |        |                                                                                                  |            | ION=[M+H] <sup>+</sup>    |             | 45.38    | 8.67     | 11990.17 | 0.00     |
| 77  | 50.71 | 820.61591  |        |                                                                                                  |            | ION=[M+H] <sup>+</sup>    |             | 1096.92  | 2691.17  | 179.00   | 212.67   |
| 78  | 50.75 | 863.61044  |        |                                                                                                  |            | ION=[M+H] <sup>+</sup>    |             | 2745.69  | 44.83    | 6.00     | 0.00     |
| 79  | 50.82 | 375.80079  |        |                                                                                                  |            | ION=[M+H] <sup>+</sup>    |             | 2012.15  | 3272.17  | 941.00   | 2288.67  |
| 80  | 50.94 | 1013.55181 |        |                                                                                                  |            | ION=[M+H] <sup>+</sup>    |             | 1865.54  | 3164.17  | 594.33   | 1871.00  |
| 81  | 50.99 | 345.27637  |        |                                                                                                  |            | ION=[M+H+H] <sup>2+</sup> |             | 4298.15  | 15.17    | 0.00     | 18.00    |
| 82  | 51.08 | 1539.29975 |        |                                                                                                  |            | ION=[M+H+H] <sup>2+</sup> |             | 1571.69  | 2183.00  | 368.50   | 1250.00  |
| 83  | 51.08 | 947.56643  |        |                                                                                                  |            | ION=[M+H] <sup>+</sup>    |             | 864.77   | 3963.17  | 0.00     | 0.00     |
| 84  | 51.4  | 1541.29237 |        |                                                                                                  |            | ION=[M+H+H] <sup>2+</sup> |             | 0.00     | 448.83   | 0.00     | 278.67   |
| 85  | 51.61 | 711.65348  |        |                                                                                                  |            | ION=[M+H] <sup>+</sup>    |             | 104.92   | 4192.00  | 0.00     | 0.00     |
| 86  | 51.95 | 268.1535   |        |                                                                                                  |            | ION=[M+H] <sup>+</sup>    |             | 1576.46  | 430.83   | 3341.83  | 652.33   |
| 87  | 52.4  | 321.27791  |        |                                                                                                  |            | ION=[M+H] <sup>+</sup>    |             | 0.00     | 0.00     | 0.00     | 5507.67  |
| 88  | 52.64 | 912.31943  |        |                                                                                                  |            | ION=[M+H+H] <sup>2+</sup> |             | 839.23   | 363.67   | 2863.83  | 23.67    |
| 89  | 52.96 | 386.36286  |        |                                                                                                  |            | ION=[M+H] <sup>+</sup>    |             | 0.00     | 2795.00  | 7.67     | 0.00     |
| 90  | 52.96 | 373.30881  |        |                                                                                                  |            | ION=[M+H+H] <sup>2+</sup> |             | 24.00    | 5088.00  | 23.67    | 0.00     |
| 91  | 52.96 | 99.10422   | 7.133  | Cyclohexylamine                                                                                  | C6H13N     | ION=[M+H] <sup>+</sup>    |             | 40.15    | 4522.00  | 60.50    | 60.33    |
| 92  | 53.22 | 202.08346  |        |                                                                                                  |            | ION=[M+H] <sup>+</sup>    |             | 0.00     | 934.83   | 0.00     | 0.00     |
| 93  | 53.33 | 412.30216  |        |                                                                                                  |            | ION=[M+H+H] <sup>2+</sup> |             | 2755.69  | 0.00     | 70.83    | 0.00     |
| 94  | 53.35 | 731.17609  |        |                                                                                                  |            | ION=[M+H+H] <sup>2+</sup> |             | 2368.62  | 815.50   | 815.50   | 0.00     |
| 95  | 53.46 | 417.23152  |        |                                                                                                  |            | ION=[M+H+H] <sup>2+</sup> |             | 2558.00  | 79.83    | 499.67   | 164.67   |
| 96  | 53.96 | 693.23552  |        |                                                                                                  |            | ION=[M+H] <sup>+</sup>    |             | 12223.69 | 3747.50  | 6330.67  | 944.33   |
| 97  | 54.03 | 464.14456  |        |                                                                                                  |            | ION=[M+H] <sup>+</sup>    |             | 0.00     | 445.33   | 48.33    | 0.00     |
| 98  | 54.1  | 554.26959  |        |                                                                                                  |            | ION=[M+H] <sup>+</sup>    |             | 3841.69  | 526.83   | 640.50   | 220.00   |
| 99  | 54.17 | 404.16697  |        |                                                                                                  |            | ION=[M+H+H] <sup>2+</sup> |             | 54.15    | 6826.50  | 1590.17  | 266.00   |
| 100 | 54.19 | 446.13071  |        |                                                                                                  |            | ION=[M+H+H] <sup>2+</sup> |             | 4081.69  | 3468.50  | 3907.50  | 414.00   |
| 101 | 54.2  | 431.20273  | 7.352  | 1-(2-([3-(benzylcarbamoyl)oxiran-2-yl]formamido)-3-methylpentanoyl)pyrrolidine-2-carboxylic acid | C22H29N3O6 | ION=[M+H+H] <sup>2+</sup> |             | 0.00     | 2593.67  | 930.00   | 0.00     |
| 102 | 54.57 | 380.19401  |        |                                                                                                  |            | ION=[M+H+H] <sup>2+</sup> |             | 42.31    | 0.00     | 4443.67  | 788.33   |
| 103 | 54.6  | 233.10396  | NA     | 5,8-Dimethoxy-1,4-Dimethylquinolin-2(1h)-One                                                     | C13H15NO3  | ION=[M+H] <sup>+</sup>    | 131451-78-0 | 2987.69  | 988.17   | 1064.17  | 1868.33  |
| 104 | 54.61 | 890.34297  |        |                                                                                                  |            | ION=[M+H+H] <sup>2+</sup> |             | 30537.23 | 32081.50 | 59981.50 | 18020.00 |
| 105 | 54.64 | 334.25796  |        |                                                                                                  |            | ION=[M+H] <sup>+</sup>    |             | 72.77    | 0.00     | 2336.17  | 55.00    |
| 106 | 54.64 | 436.66757  |        |                                                                                                  |            | ION=[M+H] <sup>+</sup>    |             | 950.62   | 858.17   | 1427.00  | 804.00   |
| 107 | 54.72 | 127.06273  | NA     | N-Ethylsuccinimide                                                                               | C6H9NO2    | ION=[M+H] <sup>+</sup>    | 2314-78-5   | 0.00     | 0.00     | 462.50   | 0.00     |
| 108 | 54.83 | 321.2416   |        |                                                                                                  |            | ION=[M+H] <sup>+</sup>    |             | 9.85     | 2680.67  | 112.50   | 0.00     |
| 109 | 54.85 | 344.16451  |        |                                                                                                  |            | ION=[M+H+H] <sup>2+</sup> |             | 5156.62  | 3996.00  | 7156.67  | 3221.67  |
| 110 | 54.86 | 319.13838  | 11.439 | TAN-868 A                                                                                        | C13H17N7O3 | ION=[M+H] <sup>+</sup>    |             | 9115.23  | 8021.33  | 9557.50  | 4158.67  |
| 111 | 54.86 | 215.60256  |        |                                                                                                  |            | ION=[M+H] <sup>+</sup>    |             | 4102.77  | 1632.17  | 5106.17  | 1664.00  |
| 112 | 54.99 | 254.12402  |        |                                                                                                  |            | ION=[M+H+H] <sup>2+</sup> |             | 2658.15  | 2247.33  | 2686.17  | 2068.67  |
| 113 | 55.11 | 445.9334   |        |                                                                                                  |            | ION=[M+H+H] <sup>2+</sup> |             | 495.38   | 0.00     | 0.00     | 0.00     |
| 114 | 55.29 | 289.13648  |        |                                                                                                  |            | ION=[M+H] <sup>+</sup>    |             | 3153.69  | 9031.83  | 3046.00  | 1661.67  |
| 115 | 55.47 | 229.17212  | NA     | Icaridin                                                                                         | C12H23NO3  | ION=[M+H] <sup>+</sup>    | 119515-38-7 | 2188.77  | 0.00     | 0.00     | 0.00     |
| 116 | 55.58 | 472.32813  |        |                                                                                                  |            | ION=[M+H+H] <sup>2+</sup> |             | 2117.85  | 3.67     | 0.00     | 0.00     |
| 117 | 55.85 | 483.10675  |        |                                                                                                  |            | ION=[M+H+H] <sup>2+</sup> |             | 1302.15  | 893.83   | 2470.33  | 773.67   |
| 118 | 55.88 | 261.09406  | NA     | N-(5-isopropyl-thiazol-2-yl)-2-pyridin-3-yl-acetamide                                            | C13H15N3OS | ION=[M+H] <sup>+</sup>    |             | 2610.46  | 567.83   | 237.17   | 1586.67  |
| 119 | 55.9  | 259.18929  | 20.333 | Phormidinine A                                                                                   | C17H25NO   | ION=[M+H] <sup>+</sup>    |             | 4926.77  | 1268.17  | 1342.17  | 3214.33  |
| 120 | 56.13 | 230.60542  |        |                                                                                                  |            | ION=[M+H] <sup>+</sup>    |             | 8349.38  | 0.00     | 0.00     | 3094.00  |
| 121 | 56.24 | 199.09397  |        |                                                                                                  |            | ION=[M+H] <sup>+</sup>    |             | 516.62   | 587.00   | 757.83   | 23.33    |
| 122 | 56.28 | 242.16385  | NA     | Anaephene B                                                                                      | C17H22O    | ION=[M+H] <sup>+</sup>    |             | 2894.92  | 0.00     | 22.17    | 0.00     |
| 123 | 56.48 | 631.33294  |        |                                                                                                  |            | ION=[M+H+H] <sup>2+</sup> |             | 102.92   | 22.67    | 23.00    | 6221.67  |
| 124 | 56.6  | 146.06901  | NA     | D-(-)-Glutamine                                                                                  | C5H10N2O3  | ION=[M+H] <sup>+</sup>    |             | 2752.46  | 1321.83  | 2811.33  | 1761.33  |
| 125 | 56.63 | 277.7886   |        |                                                                                                  |            | ION=[M+H] <sup>+</sup>    |             | 1117.69  | 208.00   | 0.00     | 326.33   |
| 126 | 56.73 | 638.27783  |        |                                                                                                  |            | ION=[M+H+H] <sup>2+</sup> |             | 0.00     | 0.00     | 2134.83  | 1329.67  |

|     |       |           |        |                                                             |            |                           |             |          |          |          |          |
|-----|-------|-----------|--------|-------------------------------------------------------------|------------|---------------------------|-------------|----------|----------|----------|----------|
| 127 | 57    | 190.11816 |        |                                                             |            | ION=[M+H] <sup>+</sup>    |             | 322.00   | 1227.67  | 3273.33  | 6447.67  |
| 128 | 57.08 | 287.19499 |        |                                                             |            | ION=[M+H] <sup>+</sup>    |             | 7246.31  | 1430.33  | 2346.50  | 5463.67  |
| 129 | 57.56 | 872.33618 |        |                                                             |            | ION=[M+H+H] <sup>2+</sup> |             | 395.54   | 1211.50  | 2505.00  | 0.00     |
| 130 | 57.63 | 532.24983 |        |                                                             |            | ION=[M+H+H] <sup>2+</sup> |             | 2164.31  | 353.83   | 3414.50  | 3190.00  |
| 131 | 57.79 | 436.17603 |        |                                                             |            | ION=[M+H+H] <sup>2+</sup> |             | 8413.69  | 17225.83 | 19367.00 | 42243.67 |
| 132 | 57.83 | 243.19477 |        |                                                             |            | ION=[M+H] <sup>+</sup>    |             | 9602.92  | 30.17    | 0.00     | 5484.00  |
| 133 | 57.84 | 957.41714 |        |                                                             |            | ION=[M+H+H] <sup>2+</sup> |             | 0.00     | 43.83    | 0.00     | 1383.33  |
| 134 | 57.85 | 306.16162 |        |                                                             |            | ION=[M+H] <sup>+</sup>    |             | 64602.62 | 2187.33  | 0.00     | 140.67   |
| 135 | 57.9  | 195.08734 | NA     | N-Acetyldopamine                                            | C10H13NO3  | ION=[M+H] <sup>+</sup>    |             | 623.23   | 131.83   | 494.50   | 0.00     |
| 136 | 57.99 | 267.09512 | 9.327  | Vidarabine   Adenosin                                       | C10H13N5O4 | ION=[M+H] <sup>+</sup>    |             | 2477.23  | 3017.17  | 3825.50  | 2370.33  |
| 137 | 58.02 | 376.23469 |        |                                                             |            | ION=[M+H+H] <sup>2+</sup> |             | 294.77   | 526.50   | 0.00     | 0.00     |
| 138 | 58.03 | 241.55389 |        |                                                             |            | ION=[M+H] <sup>+</sup>    |             | 56.46    | 76.67    | 589.33   | 108.33   |
| 139 | 58.05 | 281.10904 |        |                                                             |            | ION=[M+H] <sup>+</sup>    |             | 69.85    | 1959.33  | 370.17   | 77.33    |
| 140 | 58.13 | 492.12554 |        |                                                             |            | ION=[M+H+H] <sup>2+</sup> |             | 3276.00  | 4680.17  | 7930.00  | 2353.00  |
| 141 | 58.19 | 601.23413 |        |                                                             |            | ION=[M+H] <sup>+</sup>    |             | 6002.77  | 3970.67  | 17650.50 | 15671.00 |
| 142 | 58.28 | 432.22351 |        |                                                             |            | ION=[M+H+H] <sup>2+</sup> |             | 387.23   | 0.00     | 0.00     | 0.00     |
| 143 | 58.3  | 171.64307 |        |                                                             |            | ION=[M+H] <sup>+</sup>    |             | 1705.54  | 0.00     | 0.00     | 0.00     |
| 144 | 58.36 | 426.22801 |        |                                                             |            | ION=[M+H+H] <sup>2+</sup> |             | 813.08   | 0.00     | 0.00     | 0.00     |
| 145 | 58.43 | 700.3931  |        |                                                             |            | ION=[M+H+H] <sup>2+</sup> |             | 11.38    | 0.00     | 26.67    | 5019.67  |
| 146 | 58.54 | 946.30048 |        |                                                             |            | ION=[M+H+H] <sup>2+</sup> |             | 1009.69  | 1060.33  | 2979.00  | 771.00   |
| 147 | 58.65 | 293.04248 |        |                                                             |            | ION=[M+H] <sup>+</sup>    |             | 103.69   | 42.50    | 108.67   | 2691.33  |
| 148 | 58.74 | 266.12989 | NA     | (E,E)-Dienestrol                                            | C18H18O2   | ION=[M+H] <sup>+</sup>    |             | 110.77   | 81.17    | 1011.67  | 319.33   |
| 149 | 58.79 | 227.049   |        |                                                             |            | ION=[M+H] <sup>+</sup>    |             | 1184.15  | 1227.83  | 0.00     | 0.00     |
| 150 | 58.86 | 175.09665 |        |                                                             |            | ION=[M+H] <sup>+</sup>    |             | 2196.46  | 3712.83  | 2354.17  | 373.00   |
| 151 | 58.89 | 247.56384 |        |                                                             |            | ION=[M+H] <sup>+</sup>    |             | 0.00     | 927.50   | 0.00     | 0.00     |
| 152 | 59.04 | 514.92527 |        |                                                             |            | ION=[M+H+H] <sup>2+</sup> |             | 1136.46  | 0.00     | 0.00     | 0.00     |
| 153 | 59.08 | 202.09635 |        |                                                             |            | ION=[M+H] <sup>+</sup>    |             | 4563.23  | 487.17   | 2049.83  | 2085.67  |
| 154 | 59.15 | 267.05511 | NA     | Oxycarboxin                                                 | C12H13NO4S | ION=[M+H] <sup>+</sup>    |             | 384.92   | 0.00     | 2219.83  | 0.00     |
| 155 | 59.22 | 563.20763 |        |                                                             |            | ION=[M+H] <sup>+</sup>    |             | 5456.15  | 6410.33  | 3233.67  | 5377.67  |
| 156 | 59.23 | 495.12611 |        |                                                             |            | ION=[M+H+H] <sup>2+</sup> |             | 1304.92  | 1456.00  | 330.00   | 72.33    |
| 157 | 59.38 | 456.16243 |        |                                                             |            | ION=[M+H] <sup>+</sup>    |             | 12099.54 | 875.00   | 290.17   | 402.00   |
| 158 | 59.53 | 454.09729 |        |                                                             |            | ION=[M+H+H] <sup>2+</sup> |             | 2660.31  | 4245.33  | 1060.00  | 874.67   |
| 159 | 59.59 | 215.05854 | NA     | 1-Nitro-2-phenoxybenzene                                    | C12H9NO3   | ION=[M+H] <sup>+</sup>    |             | 3514.62  | 956.00   | 1033.67  | 507.00   |
| 160 | 59.6  | 549.18886 |        |                                                             |            | ION=[M+H] <sup>+</sup>    |             | 942.92   | 1822.17  | 453.50   | 571.67   |
| 161 | 59.7  | 489.16938 |        |                                                             |            | ION=[M+H] <sup>+</sup>    |             | 4743.23  | 2606.50  | 6691.00  | 11404.00 |
| 162 | 59.71 | 232.1077  | NA     | N <sup>2</sup> -(3-Carboxy-1-hydroxypropylidene)ornithine   | C9H16N2O5  | ION=[M+H] <sup>+</sup>    | 80102-04-1  | 5744.31  | 926.33   | 1837.33  | 2546.33  |
| 163 | 59.75 | 672.18589 |        |                                                             |            | ION=[M+H+H] <sup>2+</sup> |             | 1338.31  | 1387.67  | 2002.00  | 900.00   |
| 164 | 59.81 | 634.2451  |        |                                                             |            | ION=[M+H] <sup>+</sup>    |             | 1221.23  | 1075.50  | 273.83   | 479.33   |
| 165 | 59.92 | 796.30132 |        |                                                             |            | ION=[M+H] <sup>+</sup>    |             | 4100.00  | 1302.33  | 3364.67  | 10264.33 |
| 166 | 60.01 | 244.57579 |        |                                                             |            | ION=[M+H] <sup>+</sup>    |             | 21.54    | 23.50    | 2884.67  | 0.00     |
| 167 | 60.04 | 293.05325 |        |                                                             |            | ION=[M+H] <sup>+</sup>    |             | 2889.08  | 1214.17  | 193.33   | 5697.33  |
| 168 | 60.14 | 346.27263 | 16.906 | N-[2,6-Bis(diethylamino)pyridin-3-yl]cyclohexanecarboxamide | C20H34N4O  | ION=[M+H+H] <sup>2+</sup> |             | 487.69   | 2696.67  | 0.00     | 982.00   |
| 169 | 60.18 | 416.08369 |        |                                                             |            | ION=[M+H+H] <sup>2+</sup> |             | 998.31   | 0.00     | 0.00     | 0.00     |
| 170 | 60.2  | 370.33525 |        |                                                             |            | ION=[M+H+H] <sup>2+</sup> |             | 1683.85  | 0.00     | 97.17    | 0.00     |
| 171 | 60.21 | 165.0465  | NA     | DL-methionine sulfoxide                                     | C5H11NO3S  | ION=[M+H] <sup>+</sup>    |             | 1027.08  | 0.00     | 0.00     | 0.00     |
| 172 | 60.21 | 161.06951 | NA     | Fenamole                                                    | C7H7N5     | ION=[M+H] <sup>+</sup>    | 5467-78-7   | 2436.92  | 1945.00  | 3933.83  | 2344.00  |
| 173 | 60.23 | 133.03764 |        |                                                             |            | ION=[M+H] <sup>+</sup>    |             | 1664.46  | 1973.50  | 3602.50  | 1681.33  |
| 174 | 60.24 | 472.10807 |        |                                                             |            | ION=[M+H+H] <sup>2+</sup> |             | 5089.08  | 6930.67  | 974.50   | 1714.67  |
| 175 | 60.28 | 870.33764 |        |                                                             |            | ION=[M+H] <sup>+</sup>    |             | 2031.23  | 2944.00  | 969.00   | 1808.00  |
| 176 | 60.3  | 219.54949 |        |                                                             |            | ION=[M+H] <sup>+</sup>    |             | 1845.85  | 2990.33  | 0.00     | 0.00     |
| 177 | 60.4  | 304.13771 |        |                                                             |            | ION=[M+H] <sup>+</sup>    |             | 662.00   | 230.17   | 2919.67  | 557.00   |
| 178 | 60.4  | 216.11024 |        |                                                             |            | ION=[M+H] <sup>+</sup>    |             | 8035.54  | 1253.50  | 2293.33  | 4003.00  |
| 179 | 60.44 | 439.09855 |        |                                                             |            | ION=[M+H+H] <sup>2+</sup> |             | 5207.85  | 542.67   | 2371.67  | 2559.33  |
| 180 | 60.45 | 401.15363 |        |                                                             |            | ION=[M+H] <sup>+</sup>    |             | 10978.15 | 19092.17 | 8499.67  | 13676.67 |
| 181 | 60.58 | 135.05409 |        |                                                             |            | ION=[M+H] <sup>+</sup>    |             | 108.15   | 1797.67  | 237.83   | 53.67    |
| 182 | 60.6  | 245.1377  | NA     | Tasimelteon                                                 | C15H19NO2  | ION=[M+H] <sup>+</sup>    | 609799-22-6 | 656.31   | 143.33   | 0.00     | 408.33   |
| 183 | 60.6  | 185.10923 |        |                                                             |            | ION=[M+H] <sup>+</sup>    |             | 1380.62  | 1545.17  | 0.00     | 687.67   |
| 184 | 60.63 | 708.28323 |        |                                                             |            | ION=[M+H] <sup>+</sup>    |             | 7285.69  | 11096.83 | 3583.50  | 6226.00  |
| 185 | 60.73 | 488.15036 |        |                                                             |            | ION=[M+H+H] <sup>2+</sup> |             | 0.00     | 0.00     | 7530.17  | 110.67   |
| 186 | 60.73 | 708.19515 |        |                                                             |            | ION=[M+H+H] <sup>2+</sup> |             | 2509.85  | 5629.67  | 103.00   | 542.00   |
| 187 | 60.77 | 544.24951 |        |                                                             |            | ION=[M+H] <sup>+</sup>    |             | 19.54    | 0.00     | 2012.00  | 0.00     |
| 188 | 60.89 | 462.11592 |        |                                                             |            | ION=[M+H+H] <sup>2+</sup> |             | 2227.23  | 1447.00  | 195.17   | 975.33   |
| 189 | 60.89 | 218.58589 |        |                                                             |            | ION=[M+H] <sup>+</sup>    |             | 3909.69  | 3162.17  | 6470.50  | 3461.33  |
| 190 | 60.94 | 343.14825 | 18.81  | Amphistin                                                   | C13H21N5O6 | ION=[M+H] <sup>+</sup>    |             | 1806.31  | 2391.17  | 530.17   | 1245.33  |
| 191 | 60.94 | 746.22125 |        |                                                             |            | ION=[M+H+H] <sup>2+</sup> |             | 2208.46  | 3434.83  | 1506.33  | 797.33   |
| 192 | 60.97 | 174.102   |        |                                                             |            | ION=[M+H] <sup>+</sup>    |             | 1464.46  | 436.67   | 416.83   | 0.00     |
| 193 | 60.98 | 554.24469 |        |                                                             |            | ION=[M+H] <sup>+</sup>    |             | 1805.38  | 26.83    | 415.83   | 332.67   |
| 194 | 61.14 | 560.12446 |        |                                                             |            | ION=[M+H+H] <sup>2+</sup> |             | 2378.46  | 1343.17  | 706.50   | 1355.33  |
| 195 | 61.3  | 722.1733  |        |                                                             |            | ION=[M+H+H] <sup>2+</sup> |             | 2123.69  | 694.50   | 628.50   | 1175.33  |
| 196 | 61.44 | 834.2474  |        |                                                             |            | ION=[M+H+H] <sup>2+</sup> |             | 1619.54  | 259.33   | 1049.83  | 806.67   |
| 197 | 61.49 | 495.20667 |        |                                                             |            | ION=[M+H+H] <sup>2+</sup> |             | 2082.15  | 1402.83  | 2684.50  | 2255.67  |
| 198 | 61.5  | 458.18164 |        |                                                             |            | ION=[M+H+H] <sup>2+</sup> |             | 644.15   | 0.00     | 0.00     | 0.00     |
| 199 | 61.5  | 796.21247 |        |                                                             |            | ION=[M+H+H] <sup>2+</sup> |             | 1150.62  | 1921.33  | 239.00   | 495.33   |

|     |       |           |        |                                                                                                      |             |                           |             |         |          |         |          |
|-----|-------|-----------|--------|------------------------------------------------------------------------------------------------------|-------------|---------------------------|-------------|---------|----------|---------|----------|
| 200 | 61.52 | 245.13222 |        |                                                                                                      |             | ION=[M+H] <sup>+</sup>    |             | 8275.85 | 2109.17  | 814.67  | 4984.33  |
| 201 | 61.58 | 634.16174 |        |                                                                                                      |             | ION=[M+H+H] <sup>2+</sup> |             | 2466.00 | 4254.50  | 806.17  | 3112.00  |
| 202 | 61.66 | 387.13786 |        |                                                                                                      |             | ION=[M+H] <sup>+</sup>    |             | 2818.77 | 6660.67  | 3380.17 | 2489.67  |
| 203 | 61.66 | 962.29124 |        |                                                                                                      |             | ION=[M+H+H] <sup>2+</sup> |             | 564.92  | 2083.83  | 50.00   | 98.67    |
| 204 | 61.66 | 800.24191 |        |                                                                                                      |             | ION=[M+H+H] <sup>2+</sup> |             | 521.69  | 3358.50  | 113.50  | 40.33    |
| 205 | 61.7  | 188.11705 | 7.821  | Cyclohexyl phenyl ketone                                                                             | C13H16O     | ION=[M+H] <sup>+</sup>    |             | 7812.15 | 1583.67  | 3298.33 | 4166.00  |
| 206 | 61.72 | 733.2799  |        |                                                                                                      |             | ION=[M+H] <sup>+</sup>    |             | 868.31  | 434.67   | 4009.00 | 4824.33  |
| 207 | 61.73 | 338.05319 | 18.721 | Tmp                                                                                                  | C10H15N2O9P | ION=[M+H] <sup>+</sup>    | 3590-47-4   | 2194.62 | 4110.17  | 984.17  | 860.00   |
| 208 | 61.79 | 426.08611 |        |                                                                                                      |             | ION=[M+H+H] <sup>2+</sup> |             | 1965.08 | 933.17   | 3223.83 | 1271.67  |
| 209 | 61.82 | 166.53645 |        |                                                                                                      |             | ION=[M+H] <sup>+</sup>    |             | 1436.92 | 3021.17  | 775.33  | 573.00   |
| 210 | 61.82 | 398.10638 |        |                                                                                                      |             | ION=[M+H] <sup>+</sup>    |             | 508.15  | 0.00     | 0.00    | 0.00     |
| 211 | 61.9  | 561.11396 |        |                                                                                                      |             | ION=[M+H] <sup>+</sup>    |             | 380.92  | 1529.50  | 0.00    | 264.00   |
| 212 | 61.95 | 878.26371 |        |                                                                                                      |             | ION=[M+H+H] <sup>2+</sup> |             | 1562.00 | 2484.83  | 1308.33 | 1399.00  |
| 213 | 62    | 546.14326 |        |                                                                                                      |             | ION=[M+H+H] <sup>2+</sup> |             | 3623.85 | 11607.33 | 627.83  | 1009.67  |
| 214 | 62.11 | 310.05535 | 5.733  | {{[3-hydroxy-5-(4-hydroxy-2-oxo-1,2,3,4-tetrahydropyrimidin-1-yl)oxolan-2-yl]methoxy}phosphonic acid | C9H15N2O8P  | ION=[M+H+H] <sup>2+</sup> |             | 4925.69 | 9842.67  | 2084.33 | 1791.00  |
| 215 | 62.2  | 231.1478  |        |                                                                                                      |             | ION=[M+H] <sup>+</sup>    |             | 0.00    | 4403.17  | 0.00    | 0.00     |
| 216 | 62.24 | 291.11892 | NA     | Danegaptide                                                                                          | C14H17N3O4  | ION=[M+H] <sup>+</sup>    | 943134-39-2 | 1833.69 | 6544.50  | 3159.00 | 1120.00  |
| 217 | 62.31 | 381.16354 | 18.241 | Zeatin-7-N-glucoside                                                                                 | C16H23N5O6  | ION=[M+H] <sup>+</sup>    |             | 75.08   | 14154.67 | 352.67  | 1706.33  |
| 218 | 62.46 | 550.21976 |        |                                                                                                      |             | ION=[M+H+H] <sup>2+</sup> |             | 737.08  | 322.50   | 0.00    | 0.00     |
| 219 | 62.48 | 675.27317 |        |                                                                                                      |             | ION=[M+H] <sup>+</sup>    |             | 2073.38 | 794.33   | 3627.50 | 2345.67  |
| 220 | 62.58 | 699.26593 |        |                                                                                                      |             | ION=[M+H] <sup>+</sup>    |             | 1392.31 | 547.83   | 5135.50 | 1498.33  |
| 221 | 62.67 | 648.21034 |        |                                                                                                      |             | ION=[M+H+H] <sup>2+</sup> |             | 261.23  | 442.50   | 426.50  | 0.00     |
| 222 | 62.71 | 247.60299 |        |                                                                                                      |             | ION=[M+H] <sup>+</sup>    |             | 2179.23 | 1300.17  | 2311.67 | 0.00     |
| 223 | 63.02 | 231.11846 |        |                                                                                                      |             | ION=[M+H] <sup>+</sup>    |             | 4556.62 | 0.00     | 221.00  | 0.00     |
| 224 | 63.03 | 202.1329  | NA     | Glutamine T-Butyl Ester                                                                              | C9H18N2O3   | ION=[M+H] <sup>+</sup>    | 39741-62-3  | 3252.15 | 360.00   | 2025.67 | 6754.33  |
| 225 | 63.14 | 273.11446 | NA     | [(2-Ethoxy-1-Naphthoyl)amino]methylboronic Acid                                                      | C14H16BNO4  | ION=[M+H] <sup>+</sup>    |             | 0.00    | 1606.83  | 0.00    | 0.00     |
| 226 | 63.14 | 256.56701 |        |                                                                                                      |             | ION=[M+H] <sup>+</sup>    |             | 1686.15 | 1646.83  | 710.33  | 759.33   |
| 227 | 63.3  | 291.10971 | NA     | Obscuroside A1                                                                                       | C15H17NO5   | ION=[M+H] <sup>+</sup>    |             | 1511.23 | 0.00     | 2146.17 | 1081.33  |
| 228 | 63.54 | 192.04724 | NA     | 4-Methyl-3-(2-pyridyl)-4,5-dihydro-1H-1,2,4-triazole-5-thione                                        | C8H8N4S     | ION=[M+H] <sup>+</sup>    |             | 1279.69 | 1050.33  | 605.00  | 202.00   |
| 229 | 63.62 | 384.09404 |        |                                                                                                      |             | ION=[M+H+H] <sup>2+</sup> |             | 484.31  | 1128.83  | 0.00    | 0.00     |
| 230 | 63.63 | 353.01787 |        |                                                                                                      |             | ION=[M+H] <sup>+</sup>    |             | 1325.23 | 2451.00  | 622.00  | 772.00   |
| 231 | 63.8  | 486.15385 |        |                                                                                                      |             | ION=[M+H+H] <sup>2+</sup> |             | 641.38  | 303.67   | 180.00  | 0.00     |
| 232 | 63.93 | 624.16542 |        |                                                                                                      |             | ION=[M+H+H] <sup>2+</sup> |             | 952.15  | 1762.17  | 5357.17 | 1517.67  |
| 233 | 64.42 | 530.18291 |        |                                                                                                      |             | ION=[M+H] <sup>+</sup>    |             | 2603.54 | 9200.50  | 249.83  | 1646.33  |
| 234 | 64.86 | 346.14551 |        |                                                                                                      |             | ION=[M+H+H] <sup>2+</sup> |             | 1741.38 | 791.33   | 202.83  | 2205.33  |
| 235 | 64.99 | 173.07816 | 19.545 | 4,8-dimethyl-6-hydroxyquinoline                                                                      | C11H11NO    | ION=[M+H] <sup>+</sup>    |             | 1806.46 | 12931.67 | 7367.83 | 0.00     |
| 236 | 65.2  | 642.17026 |        |                                                                                                      |             | ION=[M+H+H] <sup>2+</sup> |             | 1237.54 | 923.67   | 3026.67 | 873.00   |
| 237 | 65.21 | 424.16975 |        |                                                                                                      |             | ION=[M+H] <sup>+</sup>    |             | 2219.08 | 1554.83  | 5488.67 | 2384.67  |
| 238 | 65.79 | 408.22126 |        |                                                                                                      |             | ION=[M+H+H] <sup>2+</sup> |             | 1329.38 | 251.00   | 503.83  | 550.33   |
| 239 | 71.03 | 379.96391 |        |                                                                                                      |             | ION=[M+H+H] <sup>2+</sup> |             | 2105.85 | 1024.17  | 1673.50 | 2753.67  |
| 240 | 72.39 | 343.94017 |        |                                                                                                      |             | ION=[M+H+H] <sup>2+</sup> |             | 0.00    | 2325.33  | 0.00    | 0.00     |
| 241 | 72.45 | 595.1601  |        |                                                                                                      |             | ION=[M+H+H] <sup>2+</sup> |             | 66.62   | 21.50    | 2540.17 | 34.67    |
| 242 | 72.94 | 648.23081 |        |                                                                                                      |             | ION=[M+H+H] <sup>2+</sup> |             | 826.00  | 632.67   | 449.50  | 1206.67  |
| 243 | 73.64 | 212.99778 |        |                                                                                                      |             | ION=[M+H] <sup>+</sup>    |             | 4376.77 | 4089.17  | 3721.83 | 3547.00  |
| 244 | 77    | 582.18527 |        |                                                                                                      |             | ION=[M+H+H] <sup>2+</sup> |             | 4992.31 | 147.33   | 4759.67 | 3159.67  |
| 245 | 77.08 | 527.83343 |        |                                                                                                      |             | ION=[M+H] <sup>+</sup>    |             | 3353.54 | 3629.33  | 2479.83 | 5757.33  |
| 246 | 83.22 | 390.33523 |        |                                                                                                      |             | ION=[M+H+H] <sup>2+</sup> |             | 0.00    | 4084.00  | 8.83    | 0.00     |
| 247 | 83.35 | 212.04458 |        |                                                                                                      |             | ION=[M+H] <sup>+</sup>    |             | 381.08  | 0.00     | 4717.83 | 1036.67  |
| 248 | 83.42 | 458.13988 |        |                                                                                                      |             | ION=[M+H] <sup>+</sup>    |             | 9.85    | 4.33     | 2480.50 | 179.67   |
| 249 | 85.29 | 115.98662 |        |                                                                                                      |             | ION=[M+H] <sup>+</sup>    |             | 2689.08 | 2471.33  | 1843.67 | 3690.33  |
| 250 | 85.35 | 194.96134 |        |                                                                                                      |             | ION=[M+H] <sup>+</sup>    |             | 2114.15 | 1974.50  | 1597.83 | 560.00   |
| 251 | 86.18 | 140.95079 |        |                                                                                                      |             | ION=[M+H] <sup>+</sup>    |             | 1632.46 | 2325.50  | 1933.17 | 47.67    |
| 252 | 86.37 | 640.77552 |        |                                                                                                      |             | ION=[M+H] <sup>+</sup>    |             | 8146.46 | 6977.50  | 6535.33 | 12583.67 |
| 253 | 86.58 | 489.10021 |        |                                                                                                      |             | ION=[M+H] <sup>+</sup>    |             | 286.15  | 0.00     | 5965.00 | 1032.33  |
| 254 | 87.22 | 475.84215 |        |                                                                                                      |             | ION=[M+H+H] <sup>2+</sup> |             | 412.62  | 253.83   | 1053.17 | 0.00     |
| 255 | 88.4  | 358.00731 |        |                                                                                                      |             | ION=[M+H] <sup>+</sup>    |             | 1565.54 | 820.00   | 3074.17 | 5664.33  |
| 256 | 89.47 | 542.79644 |        |                                                                                                      |             | ION=[M+H] <sup>+</sup>    |             | 3994.62 | 3417.50  | 3322.17 | 6120.33  |
| 257 | 90.87 | 576.26467 |        |                                                                                                      |             | ION=[M+H+H] <sup>2+</sup> |             | 0.00    | 145.67   | 6647.33 | 0.00     |
| 258 | 91.21 | 389.08931 |        |                                                                                                      |             | ION=[M+H] <sup>+</sup>    |             | 1541.85 | 390.67   | 6815.83 | 2566.67  |
| 259 | 91.71 | 243.19499 |        |                                                                                                      |             | ION=[M+H] <sup>+</sup>    |             | 3117.85 | 283.17   | 0.00    | 381.00   |
| 260 | 91.81 | 301.46743 |        |                                                                                                      |             | ION=[M+H] <sup>+</sup>    |             | 1126.62 | 566.33   | 1399.83 | 29.00    |
| 261 | 92.45 | 289.12868 | 14.816 | Tabtoxin                                                                                             | C11H19N3O6  | ION=[M+H] <sup>+</sup>    |             | 1952.00 | 4082.00  | 3550.67 | 454.33   |
| 262 | 92.92 | 741.94716 |        |                                                                                                      |             | ION=[M+H+H] <sup>2+</sup> |             | 494.92  | 0.00     | 0.00    | 0.00     |
| 263 | 93.12 | 416.03896 |        |                                                                                                      |             | ION=[M+H] <sup>+</sup>    |             | 7871.08 | 1160.50  | 2715.17 | 4805.67  |
| 264 | 93.66 | 291.10813 | NA     | Obscuroside A1                                                                                       | C15H17NO5   | ION=[M+H] <sup>+</sup>    |             | 50.15   | 1851.83  | 0.00    | 0.00     |
| 265 | 93.81 | 636.1271  |        |                                                                                                      |             | ION=[M+H] <sup>+</sup>    |             | 1185.23 | 13.83    | 68.50   | 0.00     |



|     |       |            |        |                                                                                                                          |               |                                         |          |          |          |          |        |
|-----|-------|------------|--------|--------------------------------------------------------------------------------------------------------------------------|---------------|-----------------------------------------|----------|----------|----------|----------|--------|
| 266 | 93.82 | 449.15647  | 13.379 | 1-((3-methyl-4-[4-(1,1,1-trifluoro-2-hydroxypropan-2-yl)benzenesulfonyl]piperazin-1-yl)methyl)cyclopropane-1-carboxamide | C19H26F3N3O4S | ION=[M+H] <sup>+</sup>                  | 1345.69  | 190.50   | 260.50   | 17.33    |        |
| 267 | 93.95 | 370.97362  |        |                                                                                                                          |               | ION=[M+H] <sup>+</sup>                  | 1401.85  | 591.00   | 907.00   | 23.00    |        |
| 268 | 93.96 | 374.01943  |        |                                                                                                                          |               | ION=[M+H] <sup>+</sup>                  | 2190.46  | 704.83   | 986.83   | 0.00     |        |
| 269 | 94.26 | 172.01435  |        |                                                                                                                          |               | ION=[M+H] <sup>+</sup>                  | 2547.23  | 991.00   | 3204.00  | 3590.00  |        |
| 270 | 94.47 | 271.25859  |        |                                                                                                                          |               | ION=[M+H+H] <sup>2+</sup>               | 0.00     | 2309.83  | 9.33     | 0.00     |        |
| 271 | 94.63 | 420.34541  |        |                                                                                                                          |               | ION=[M+H+H] <sup>2+</sup>               | 352.15   | 2503.83  | 0.00     | 0.00     |        |
| 272 | 94.66 | 904.40412  |        |                                                                                                                          |               | ION=[M+H+H] <sup>2</sup> 3 <sup>+</sup> | 1120.62  | 1096.17  | 5043.17  | 2158.67  |        |
| 273 | 94.96 | 344.96772  |        |                                                                                                                          |               | ION=[M+H] <sup>+</sup>                  | 1190.46  | 472.00   | 1937.33  | 0.00     |        |
| 274 | 95.1  | 315.66646  |        |                                                                                                                          |               | ION=[M+H] <sup>+</sup>                  | 54.00    | 0.00     | 0.00     | 1211.67  |        |
| 275 | 95.11 | 658.79813  |        |                                                                                                                          |               | ION=[M+H+H] <sup>2+</sup>               | 433.08   | 840.83   | 3051.17  | 625.00   |        |
| 276 | 95.16 | 329.64922  |        |                                                                                                                          |               | ION=[M+H] <sup>+</sup>                  | 317.23   | 526.00   | 2027.33  | 0.00     |        |
| 277 | 95.22 | 757.34087  |        |                                                                                                                          |               | ION=[M+H+H] <sup>2+</sup>               | 42.31    | 8.83     | 71.00    | 5641.67  |        |
| 278 | 95.23 | 393.29849  |        |                                                                                                                          |               | ION=[M+H+H] <sup>2+</sup>               | 0.00     | 0.00     | 0.00     | 4751.00  |        |
| 279 | 95.27 | 196.64972  |        |                                                                                                                          |               | ION=[M+H] <sup>+</sup>                  | 0.00     | 19.00    | 0.00     | 4341.00  |        |
| 280 | 95.28 | 631.33228  |        |                                                                                                                          |               | ION=[M+H+H] <sup>2+</sup>               | 1296.92  | 385.17   | 761.50   | 7735.33  |        |
| 281 | 95.33 | 343.28267  |        |                                                                                                                          |               | ION=[M+H+H] <sup>2+</sup>               | 6689.08  | 433.00   | 0.00     | 0.00     |        |
| 282 | 95.34 | 1081.4825  |        |                                                                                                                          |               | ION=[M+H+H] <sup>2+</sup>               | 2518.77  | 1753.50  | 7611.67  | 5128.00  |        |
| 283 | 95.41 | 403.22385  |        |                                                                                                                          |               | ION=[M+H] <sup>+</sup>                  | 35.23    | 2150.33  | 0.00     | 0.00     |        |
| 284 | 95.46 | 860.38404  |        |                                                                                                                          |               | ION=[M+H+H] <sup>2+</sup>               | 3414.46  | 2590.50  | 13658.00 | 5900.67  |        |
| 285 | 95.59 | 642.35594  |        |                                                                                                                          |               | ION=[M+H+H] <sup>2+</sup>               | 585.23   | 0.00     | 0.00     | 0.00     |        |
| 286 | 95.59 | 346.27199  | 16.696 | N-[2,6-Bis(diethylamino)pyridin-3-yl]cyclohexanecarboxamide                                                              | C20H34N4O     | ION=[M+H+H] <sup>2+</sup>               | 0.00     | 7732.33  | 8.83     | 0.00     |        |
| 287 | 95.59 | 329.39759  |        |                                                                                                                          |               | ION=[M+H] <sup>+</sup>                  | 467.23   | 0.00     | 0.00     | 0.00     |        |
| 288 | 95.73 | 431.32637  |        |                                                                                                                          |               | ION=[M+H+H] <sup>2+</sup>               | 0.00     | 0.00     | 539.83   | 0.00     |        |
| 289 | 95.74 | 433.35212  |        |                                                                                                                          |               | ION=[M+H+H] <sup>2+</sup>               | 0.00     | 0.00     | 2305.67  | 0.00     |        |
| 290 | 95.91 | 638.28147  |        |                                                                                                                          |               | ION=[M+H+H] <sup>2+</sup>               | 3518.31  | 2823.50  | 13396.67 | 2916.33  |        |
| 291 | 95.94 | 608.23044  |        |                                                                                                                          |               | ION=[M+H] <sup>+</sup>                  | 14.77    | 0.00     | 1685.83  | 0.00     |        |
| 292 | 95.95 | 981.94398  |        |                                                                                                                          |               | ION=[M+H+H] <sup>2+</sup>               | 368.77   | 330.83   | 1335.33  | 187.33   |        |
| 293 | 95.95 | 981.43945  |        |                                                                                                                          |               | ION=[M+H+H] <sup>2+</sup>               | 731.08   | 503.50   | 1689.33  | 231.00   |        |
| 294 | 95.95 | 429.69516  |        |                                                                                                                          |               | ION=[M+H] <sup>+</sup>                  | 0.00     | 0.00     | 424.50   | 28.00    |        |
| 295 | 96.01 | 638.78197  |        |                                                                                                                          |               | ION=[M+H+H] <sup>2+</sup>               | 2424.46  | 1298.50  | 8491.17  | 1661.00  |        |
| 296 | 96.03 | 512.35081  |        |                                                                                                                          |               | ION=[M+H+H] <sup>2+</sup>               | 4106.46  | 0.00     | 0.00     | 26.67    |        |
| 297 | 96.12 | 387.30933  |        |                                                                                                                          |               | ION=[M+H+H] <sup>2+</sup>               | 0.00     | 2827.00  | 12.00    | 30.00    |        |
| 298 | 96.12 | 893.38697  |        |                                                                                                                          |               | ION=[M+H] <sup>+</sup>                  | 0.00     | 1666.17  | 80.33    | 0.00     |        |
| 299 | 96.13 | 613.39606  |        |                                                                                                                          |               | ION=[M+H+H] <sup>2+</sup>               | 4866.15  | 1129.00  | 7.83     | 0.00     |        |
| 300 | 96.14 | 300.28598  |        |                                                                                                                          |               | ION=[M+H+H] <sup>2+</sup>               | 6.62     | 6.00     | 3111.50  | 6753.33  |        |
| 301 | 96.2  | 1456.57834 |        |                                                                                                                          |               | ION=[M+H+H] <sup>2+</sup>               | 3709.54  | 1385.50  | 5410.00  | 1552.67  |        |
| 302 | 96.23 | 306.69773  |        |                                                                                                                          |               | ION=[M+H] <sup>+</sup>                  | 0.00     | 1068.50  | 0.00     | 0.00     |        |
| 303 | 96.25 | 684.42302  |        |                                                                                                                          |               | ION=[M+H+H] <sup>2+</sup>               | 2332.15  | 116.67   | 394.50   | 28.67    |        |
| 304 | 96.28 | 492.23619  |        |                                                                                                                          |               | ION=[M+H+H] <sup>2+</sup>               | 4440.62  | 792.33   | 1212.33  | 0.00     |        |
| 305 | 96.31 | 859.88309  |        |                                                                                                                          |               | ION=[M+H+H] <sup>2+</sup>               | 4405.54  | 5070.00  | 22459.83 | 7350.67  |        |
| 306 | 96.34 | 1347.59631 |        |                                                                                                                          |               | ION=[M+H+H] <sup>2</sup> 3 <sup>+</sup> | 3931.69  | 4426.17  | 14301.83 | 5129.00  |        |
| 307 | 96.35 | 319.38998  |        |                                                                                                                          |               | ION=[M+H] <sup>+</sup>                  | 0.00     | 443.00   | 127.17   | 0.00     |        |
| 308 | 96.35 | 1080.49161 |        |                                                                                                                          |               | ION=[M+H+H] <sup>2+</sup>               | 169.08   | 31.67    | 1079.33  | 482.33   |        |
| 309 | 96.36 | 1668.7301  |        |                                                                                                                          |               | ION=[M+H+H] <sup>2</sup> 3 <sup>+</sup> | 279.85   | 784.00   | 2054.67  | 624.67   |        |
| 310 | 96.37 | 401.32527  |        |                                                                                                                          |               | ION=[M+H+H] <sup>2+</sup>               | 0.00     | 2606.50  | 0.00     | 10.33    |        |
| 311 | 96.44 | 744.40438  |        |                                                                                                                          |               | ION=[M+H+H] <sup>2+</sup>               | 853.23   | 1659.67  | 228.00   | 910.33   |        |
| 312 | 96.44 | 872.33468  |        |                                                                                                                          |               | ION=[M+H+H] <sup>2+</sup>               | 1842.00  | 2532.67  | 1974.17  | 1442.67  |        |
| 313 | 96.46 | 893.38018  |        |                                                                                                                          |               | ION=[M+H] <sup>+</sup>                  | 0.00     | 1925.83  | 180.33   | 0.00     |        |
| 314 | 96.47 | 200.66152  |        |                                                                                                                          |               | ION=[M+H] <sup>+</sup>                  | 0.00     | 535.33   | 0.00     | 0.00     |        |
| 315 | 96.52 | 598.96529  |        |                                                                                                                          |               | ION=[M+H] <sup>+</sup>                  | 12.00    | 3180.00  | 0.00     | 0.00     |        |
| 316 | 96.6  | 859.39022  |        |                                                                                                                          |               | ION=[M+H+H] <sup>2+</sup>               | 2027.08  | 4047.17  | 8124.17  | 3114.67  |        |
| 317 | 96.63 | 1117.49851 |        |                                                                                                                          |               | ION=[M+H+H] <sup>2+</sup>               | 120.62   | 312.33   | 2117.00  | 893.00   |        |
| 318 | 96.64 | 1028.47585 |        |                                                                                                                          |               | ION=[M+H+H] <sup>2+</sup>               | 425.23   | 0.00     | 0.00     | 0.00     |        |
| 319 | 96.64 | 354.33463  |        |                                                                                                                          |               | ION=[M+H+H] <sup>2+</sup>               | 2480.00  | 0.00     | 0.00     | 14.00    |        |
| 320 | 96.66 | 602.22084  |        |                                                                                                                          |               | ION=[M+H] <sup>+</sup>                  | 0.00     | 5433.50  | 0.00     | 0.00     |        |
| 321 | 96.66 | 140.04711  | 10.144 | 2-Methoxyresorcinol                                                                                                      | C7H8O3        | ION=[M+H] <sup>+</sup>                  | 27.54    | 4176.50  | 0.00     | 0.00     |        |
| 322 | 96.66 | 138.06785  | 4.854  | 2-Phenoxyethanol                                                                                                         | C8H10O2       | ION=[M+H] <sup>+</sup>                  | 122-99-6 | 61.38    | 10059.00 | 24.83    | 105.67 |
| 323 | 96.66 | 152.04762  |        |                                                                                                                          |               | ION=[M+H] <sup>+</sup>                  | 21.08    | 2592.83  | 0.00     | 66.00    |        |
| 324 | 96.69 | 343.95262  |        |                                                                                                                          |               | ION=[M+H] <sup>+</sup>                  | 413.69   | 629.17   | 2928.67  | 583.33   |        |
| 325 | 96.69 | 688.29209  |        |                                                                                                                          |               | ION=[M+H] <sup>+</sup>                  | 145.69   | 9.00     | 4719.83  | 11.67    |        |
| 326 | 96.75 | 528.28641  |        |                                                                                                                          |               | ION=[M+H+H] <sup>2+</sup>               | 1152.46  | 421.67   | 2819.17  | 1082.00  |        |
| 327 | 96.79 | 700.39037  |        |                                                                                                                          |               | ION=[M+H+H] <sup>2</sup> 3 <sup>+</sup> | 0.00     | 21.17    | 0.00     | 18622.67 |        |
| 328 | 96.86 | 413.37265  |        |                                                                                                                          |               | ION=[M+H+H] <sup>2+</sup>               | 6.62     | 0.00     | 29250.17 | 0.00     |        |
| 329 | 96.87 | 1080.9952  |        |                                                                                                                          |               | ION=[M+H+H] <sup>2+</sup>               | 1341.85  | 2633.50  | 5571.17  | 3207.00  |        |
| 330 | 96.9  | 826.33876  |        |                                                                                                                          |               | ION=[M+H+H] <sup>2+</sup>               | 26802.77 | 25564.00 | 25325.83 | 21167.33 |        |
| 331 | 96.9  | 721.32385  |        |                                                                                                                          |               | ION=[M+H] <sup>+</sup>                  | 13.08    | 122.00   | 2341.83  | 0.00     |        |
| 332 | 96.9  | 457.17759  | NA     | Dankastatin B                                                                                                            | C23H33Cl2NO4  | ION=[M+H] <sup>+</sup>                  | 14.92    | 14.67    | 509.17   | 0.00     |        |
| 333 | 96.9  | 720.99009  |        |                                                                                                                          |               | ION=[M+H] <sup>+</sup>                  | 0.00     | 0.00     | 479.00   | 0.00     |        |
| 334 | 96.9  | 865.18134  |        |                                                                                                                          |               | ION=[M+H+H] <sup>2+</sup>               | 841.85   | 908.33   | 3849.33  | 1692.00  |        |
| 335 | 96.9  | 521.23126  |        |                                                                                                                          |               | ION=[M+H] <sup>+</sup>                  | 748.92   | 396.17   | 2167.00  | 1968.67  |        |
| 336 | 96.9  | 432.99035  |        |                                                                                                                          |               | ION=[M+H] <sup>+</sup>                  | 216.62   | 56.00    | 1348.00  | 270.33   |        |

|     |       |            |        |                                                                 |            |                |         |          |          |          |          |
|-----|-------|------------|--------|-----------------------------------------------------------------|------------|----------------|---------|----------|----------|----------|----------|
| 337 | 96.9  | 1225.5418  |        |                                                                 |            | ION=[M+H+H2]3+ |         | 143.38   | 58.67    | 2177.67  | 0.00     |
| 338 | 96.92 | 229.63599  |        |                                                                 |            | ION=[M+H]+     |         | 1606.31  | 252.17   | 575.33   | 615.67   |
| 339 | 96.92 | 171.80704  |        |                                                                 |            | ION=[M+H]+     |         | 616.46   | 0.00     | 0.00     | 0.00     |
| 340 | 96.92 | 275.14745  |        |                                                                 |            | ION=[M+H]+     |         | 491.38   | 60.33    | 0.00     | 0.00     |
| 341 | 96.92 | 426.675    |        |                                                                 |            | ION=[M+H]+     |         | 393.85   | 0.00     | 0.00     | 0.00     |
| 342 | 96.92 | 402.22306  |        |                                                                 |            | ION=[M+H+H]2+  |         | 1819.08  | 682.50   | 526.00   | 1965.33  |
| 343 | 96.92 | 703.36904  |        |                                                                 |            | ION=[M+H+H]2+  |         | 2336.00  | 335.33   | 500.50   | 958.00   |
| 344 | 96.92 | 745.39313  |        |                                                                 |            | ION=[M+H+H]2+  |         | 2281.08  | 840.00   | 144.00   | 662.00   |
| 345 | 96.92 | 498.28648  |        |                                                                 |            | ION=[M+H+H]2+  |         | 898.62   | 42.67    | 315.83   | 0.00     |
| 346 | 96.93 | 894.91034  |        |                                                                 |            | ION=[M+H+H]2+  |         | 399.23   | 2391.17  | 8066.33  | 506.33   |
| 347 | 96.96 | 673.79961  |        |                                                                 |            | ION=[M+H+H]2+  |         | 1719.23  | 1952.67  | 8569.33  | 1919.33  |
| 348 | 96.96 | 1347.61366 |        |                                                                 |            | ION=[M+H+H]2+  |         | 339.54   | 501.83   | 3110.83  | 179.00   |
| 349 | 96.97 | 1719.7697  |        |                                                                 |            | ION=[M+H+H2]3+ |         | 1746.62  | 1517.33  | 11701.17 | 3304.67  |
| 350 | 96.97 | 370.32976  |        |                                                                 |            | ION=[M+H+H]2+  |         | 4982.92  | 0.00     | 182.17   | 0.00     |
| 351 | 97.02 | 446.80006  |        |                                                                 |            | ION=[M+H]+     |         | 51.38    | 115.00   | 1870.33  | 141.33   |
| 352 | 97.06 | 1790.80773 |        |                                                                 |            | ION=[M+H+H2]3+ |         | 371.38   | 987.67   | 5231.67  | 778.00   |
| 353 | 97.07 | 687.35103  |        |                                                                 |            | ION=[M+H+H2]3+ |         | 0.00     | 0.00     | 0.00     | 989.33   |
| 354 | 97.07 | 193.1262   |        |                                                                 |            | ION=[M+H]+     |         | 23.54    | 0.00     | 0.00     | 7557.33  |
| 355 | 97.07 | 219.12073  | NA     | Prumycin                                                        | C8H17N3O4  | ION=[M+H]+     |         | 297.08   | 84.83    | 293.83   | 3693.00  |
| 356 | 97.08 | 1117.00524 |        |                                                                 |            | ION=[M+H+H]2+  |         | 198.46   | 450.67   | 2782.83  | 1113.67  |
| 357 | 97.1  | 331.55257  |        |                                                                 |            | ION=[M+H]+     |         | 1555.85  | 1242.67  | 2433.50  | 888.67   |
| 358 | 97.11 | 472.32291  | 14.551 | Comnostin D                                                     | C29H44O5   | ION=[M+H+H]2+  |         | 6641.38  | 0.00     | 484.67   | 25.67    |
| 359 | 97.13 | 2160.99128 |        |                                                                 |            | ION=[M+H+H2]3+ |         | 0.00     | 356.83   | 891.50   | 0.00     |
| 360 | 97.13 | 628.34732  |        |                                                                 |            | ION=[M+H+H]2+  |         | 498.15   | 981.67   | 2023.17  | 748.33   |
| 361 | 97.13 | 1392.4351  |        |                                                                 |            | ION=[M+H+H]2+  |         | 0.00     | 0.00     | 601.83   | 0.00     |
| 362 | 97.13 | 520.83875  |        |                                                                 |            | ION=[M+H]+     |         | 194.92   | 1417.00  | 2446.33  | 925.00   |
| 363 | 97.13 | 343.75308  |        |                                                                 |            | ION=[M+H]+     |         | 90.77    | 492.67   | 1109.50  | 0.00     |
| 364 | 97.13 | 446.60433  |        |                                                                 |            | ION=[M+H]+     |         | 9.69     | 363.67   | 1793.83  | 170.00   |
| 365 | 97.13 | 192.05915  | NA     | 4-(carboxyvin-2-yl)phenylboronic Acid                           | C9H9BO4    | ION=[M+H]+     |         | 1177.23  | 1026.50  | 2613.50  | 0.00     |
| 366 | 97.13 | 1030.3376  |        |                                                                 |            | ION=[M+H+H]2+  |         | 914.15   | 364.00   | 232.17   | 3583.33  |
| 367 | 97.13 | 657.3561   |        |                                                                 |            | ION=[M+H+H2]3+ |         | 0.00     | 0.00     | 109.67   | 851.67   |
| 368 | 97.13 | 596.60972  |        |                                                                 |            | ION=[M+H]+     |         | 0.00     | 0.00     | 1123.83  | 0.00     |
| 369 | 97.13 | 596.94233  |        |                                                                 |            | ION=[M+H]+     |         | 22.92    | 203.00   | 1894.33  | 114.33   |
| 370 | 97.13 | 1073.95677 |        |                                                                 |            | ION=[M+H+H]2+  |         | 1002.62  | 2342.67  | 3240.67  | 1780.00  |
| 371 | 97.13 | 720.33306  |        |                                                                 |            | ION=[M+H]+     |         | 0.00     | 0.00     | 433.17   | 0.00     |
| 372 | 97.13 | 651.30072  |        |                                                                 |            | ION=[M+H]+     |         | 562.15   | 612.33   | 1004.83  | 458.00   |
| 373 | 97.13 | 432.79611  |        |                                                                 |            | ION=[M+H]+     |         | 445.69   | 397.17   | 1951.00  | 910.67   |
| 374 | 97.13 | 954.33944  |        |                                                                 |            | ION=[M+H+H]2+  |         | 716.46   | 1775.67  | 2239.50  | 0.00     |
| 375 | 97.13 | 540.24844  |        |                                                                 |            | ION=[M+H]+     |         | 367.38   | 2153.33  | 1934.83  | 812.00   |
| 376 | 97.13 | 720.6684   |        |                                                                 |            | ION=[M+H]+     |         | 23.08    | 324.67   | 1682.33  | 0.00     |
| 377 | 97.14 | 2162.97959 |        |                                                                 |            | ION=[M+H+H2]3+ |         | 136.92   | 316.67   | 1046.17  | 98.67    |
| 378 | 97.16 | 458.34395  |        |                                                                 |            | ION=[M+H+H]2+  |         | 3823.38  | 0.00     | 0.00     | 0.00     |
| 379 | 97.18 | 674.30572  |        |                                                                 |            | ION=[M+H+H]2+  |         | 877.54   | 1390.50  | 5249.17  | 279.67   |
| 380 | 97.18 | 1706.69536 |        |                                                                 |            | ION=[M+H+H2]3+ |         | 2738.00  | 2017.50  | 6294.83  | 4336.67  |
| 381 | 97.19 | 852.84696  |        |                                                                 |            | ION=[M+H+H]2+  |         | 2099.23  | 1443.17  | 4436.00  | 2669.33  |
| 382 | 97.23 | 520.27659  |        |                                                                 |            | ION=[M+H+H]2+  |         | 0.00     | 19.83    | 0.00     | 15107.00 |
| 383 | 97.24 | 942.54231  |        |                                                                 |            | ION=[M+H+H2]3+ |         | 1648.92  | 693.17   | 0.00     | 510.67   |
| 384 | 97.25 | 574.30234  |        |                                                                 |            | ION=[M+H+H]2+  |         | 840.62   | 0.00     | 0.00     | 0.00     |
| 385 | 97.27 | 405.13894  |        |                                                                 |            | ION=[M+H]+     |         | 514.46   | 839.50   | 6313.00  | 3098.67  |
| 386 | 97.28 | 277.56336  |        |                                                                 |            | ION=[M+H]+     |         | 0.00     | 1387.00  | 0.00     | 0.00     |
| 387 | 97.3  | 428.18377  |        |                                                                 |            | ION=[M+H]+     |         | 98.46    | 0.00     | 71.00    | 1406.33  |
| 388 | 97.32 | 932.35422  |        |                                                                 |            | ION=[M+H+H]2+  |         | 22884.46 | 24320.50 | 39578.17 | 48007.00 |
| 389 | 97.34 | 362.1535   |        |                                                                 |            | ION=[M+H+H]2+  |         | 9.23     | 437.67   | 0.00     | 0.00     |
| 390 | 97.36 | 896.51981  |        |                                                                 |            | ION=[M+H+H2]3+ |         | 2326.15  | 762.50   | 292.67   | 285.33   |
| 391 | 97.36 | 1705.7021  |        |                                                                 |            | ION=[M+H+H2]3+ |         | 3706.31  | 2592.17  | 6623.50  | 6057.67  |
| 392 | 97.37 | 895.90052  |        |                                                                 |            | ION=[M+H+H]2+  |         | 925.23   | 1421.83  | 11559.50 | 1708.00  |
| 393 | 97.38 | 430.19247  |        |                                                                 |            | ION=[M+H]+     |         | 448.15   | 843.33   | 3680.67  | 0.00     |
| 394 | 97.39 | 460.30663  |        |                                                                 |            | ION=[M+H+H]2+  |         | 29582.62 | 21.83    | 0.00     | 120.00   |
| 395 | 97.4  | 1199.54874 |        |                                                                 |            | ION=[M+H+H]2+  |         | 60.00    | 115.67   | 2696.00  | 85.00    |
| 396 | 97.41 | 599.77078  |        |                                                                 |            | ION=[M+H]+     |         | 92.77    | 85.17    | 809.00   | 40.33    |
| 397 | 97.46 | 217.1122   | NA     | Glutethimide                                                    | C13H15NO2  | ION=[M+H]+     | 77-21-4 | 288.31   | 0.00     | 37.33    | 8223.67  |
| 398 | 97.47 | 895.40339  |        |                                                                 |            | ION=[M+H+H]2+  |         | 1001.23  | 2751.17  | 15225.17 | 2152.67  |
| 399 | 97.53 | 519.63042  |        |                                                                 |            | ION=[M+H]+     |         | 1131.54  | 1750.50  | 3578.00  | 2888.33  |
| 400 | 97.53 | 1116.51503 |        |                                                                 |            | ION=[M+H+H]2+  |         | 188.15   | 533.83   | 2804.33  | 162.00   |
| 401 | 97.53 | 853.35002  |        |                                                                 |            | ION=[M+H+H]2+  |         | 1281.54  | 1023.00  | 3630.33  | 2365.33  |
| 402 | 97.53 | 608.07355  |        |                                                                 |            | ION=[M+H]+     |         | 729.23   | 1148.50  | 2135.67  | 1374.33  |
| 403 | 97.53 | 1718.78674 |        |                                                                 |            | ION=[M+H+H2]3+ |         | 699.23   | 1457.00  | 5118.00  | 1061.00  |
| 404 | 97.53 | 914.34738  |        |                                                                 |            | ION=[M+H+H]2+  |         | 1700.92  | 1994.83  | 3515.83  | 2954.33  |
| 405 | 97.53 | 2147.92463 |        |                                                                 |            | ION=[M+H+H2]3+ |         | 676.77   | 941.50   | 2757.50  | 636.67   |
| 406 | 97.55 | 808.3335   |        |                                                                 |            | ION=[M+H+H]2+  |         | 3555.38  | 2830.67  | 5325.17  | 1162.33  |
| 407 | 97.57 | 294.6639   |        |                                                                 |            | ION=[M+H]+     |         | 1306.77  | 216.83   | 286.33   | 1253.67  |
| 408 | 97.57 | 301.1643   | NA     | 4-amino-6-(diethylcarbamoyl)-5-acetamidooxane-2-carboxylic acid | C13H23N3O5 | ION=[M+H]+     |         | 1807.08  | 593.33   | 1063.33  | 474.67   |
| 409 | 97.57 | 487.29563  |        |                                                                 |            | ION=[M+H+H]2+  |         | 1998.46  | 721.83   | 830.17   | 2537.67  |

|     |       |            |        |                                                                        |               |                |             |          |          |           |          |
|-----|-------|------------|--------|------------------------------------------------------------------------|---------------|----------------|-------------|----------|----------|-----------|----------|
| 410 | 97.57 | 550.29063  |        |                                                                        |               | ION=[M+H+H]2+  |             | 1864.62  | 975.00   | 86.67     | 0.00     |
| 411 | 97.57 | 307.67478  |        |                                                                        |               | ION=[M+H]+     |             | 1743.69  | 647.17   | 1063.33   | 298.00   |
| 412 | 97.57 | 570.33478  |        |                                                                        |               | ION=[M+H+H]2+  |             | 634.15   | 0.00     | 0.00      | 0.00     |
| 413 | 97.57 | 428.43215  |        |                                                                        |               | ION=[M+H]+     |             | 1007.23  | 0.00     | 0.00      | 0.00     |
| 414 | 97.57 | 257.71026  |        |                                                                        |               | ION=[M+H]+     |             | 497.38   | 0.00     | 0.00      | 0.00     |
| 415 | 97.57 | 746.39086  |        |                                                                        |               | ION=[M+H+H]2+  |             | 2364.77  | 1452.00  | 550.67    | 1511.33  |
| 416 | 97.57 | 372.6941   |        |                                                                        |               | ION=[M+H]+     |             | 1144.00  | 0.00     | 114.67    | 0.00     |
| 417 | 97.58 | 632.34669  |        |                                                                        |               | ION=[M+H+H]2+  |             | 3111.23  | 941.33   | 1395.33   | 3914.33  |
| 418 | 97.58 | 294.15896  |        |                                                                        |               | ION=[M+H]+     |             | 1988.77  | 1165.83  | 603.67    | 507.33   |
| 419 | 97.59 | 128.09464  |        |                                                                        |               | ION=[M+H]+     |             | 1786.46  | 501.00   | 1217.17   | 1629.33  |
| 420 | 97.59 | 748.36485  |        |                                                                        |               | ION=[M+H+H]2+  |             | 666.00   | 61.83    | 0.00      | 438.67   |
| 421 | 97.59 | 332.16964  |        |                                                                        |               | ION=[M+H]+     |             | 2125.38  | 404.17   | 837.00    | 1660.67  |
| 422 | 97.59 | 813.47176  |        |                                                                        |               | ION=[M+H+H2]3+ |             | 562.46   | 0.00     | 296.00    | 1985.67  |
| 423 | 97.59 | 714.64292  |        |                                                                        |               | ION=[M+H]+     |             | 446.77   | 0.00     | 0.00      | 134.67   |
| 424 | 97.59 | 342.19219  | NA     | Compound iv                                                            | C20H26N2O3    | ION=[M+H]+     | 87495-31-6  | 2241.54  | 680.67   | 688.67    | 1195.33  |
| 425 | 97.59 | 303.14836  | NA     | Fenoterol                                                              | C17H21NO4     | ION=[M+H]+     |             | 450.15   | 0.00     | 0.00      | 0.00     |
| 426 | 97.59 | 507.25725  |        |                                                                        |               | ION=[M+H+H]2+  |             | 760.15   | 0.00     | 29.67     | 0.00     |
| 427 | 97.59 | 984.52587  |        |                                                                        |               | ION=[M+H+H2]3+ |             | 2162.46  | 524.00   | 572.17    | 1563.33  |
| 428 | 97.65 | 1074.95107 |        |                                                                        |               | ION=[M+H+H]2+  |             | 2615.23  | 2018.00  | 5410.67   | 4547.67  |
| 429 | 97.67 | 161.06951  | NA     | Fenamole                                                               | C7H7N5        | ION=[M+H]+     | 5467-78-7   | 1814.92  | 1258.83  | 2670.33   | 2000.33  |
| 430 | 97.68 | 538.9787   |        |                                                                        |               | ION=[M+H]+     |             | 39.38    | 0.00     | 433.00    | 137.67   |
| 431 | 97.72 | 1789.82377 |        |                                                                        |               | ION=[M+H+H2]3+ |             | 62.77    | 813.00   | 2811.33   | 0.00     |
| 432 | 97.72 | 639.25933  |        |                                                                        |               | ION=[M+H]+     |             | 823.08   | 659.67   | 1442.83   | 86.33    |
| 433 | 97.72 | 1116.0185  |        |                                                                        |               | ION=[M+H+H]2+  |             | 116.00   | 616.83   | 1907.83   | 147.00   |
| 434 | 97.72 | 1302.59897 |        |                                                                        |               | ION=[M+H+H]2+  |             | 76.92    | 150.17   | 1336.17   | 148.00   |
| 435 | 97.72 | 1068.47082 |        |                                                                        |               | ION=[M+H+H]2+  |             | 1000.46  | 973.83   | 1992.83   | 1323.33  |
| 436 | 97.72 | 1302.0989  |        |                                                                        |               | ION=[M+H+H]2+  |             | 120.77   | 747.50   | 2023.50   | 345.33   |
| 437 | 97.72 | 518.2214   |        |                                                                        |               | ION=[M+H]+     |             | 887.38   | 1034.83  | 2204.17   | 992.33   |
| 438 | 97.72 | 518.42238  |        |                                                                        |               | ION=[M+H]+     |             | 827.85   | 1140.67  | 2454.00   | 1094.00  |
| 439 | 97.78 | 185.16499  |        |                                                                        |               | ION=[M+H]+     |             | 4012.92  | 0.00     | 0.00      | 0.00     |
| 440 | 97.78 | 185.66421  |        |                                                                        |               | ION=[M+H]+     |             | 5186.00  | 0.00     | 15.67     | 0.00     |
| 441 | 97.8  | 643.23097  | 11.522 | Sabarubicin                                                            | C32H37NO13    | ION=[M+H+H]2+  | 211100-13-9 | 160.92   | 8745.33  | 9.83      | 0.00     |
| 442 | 97.8  | 1299.07668 |        |                                                                        |               | ION=[M+H+H]2+  |             | 1639.85  | 1547.17  | 3185.00   | 2765.00  |
| 443 | 97.84 | 313.08505  |        |                                                                        |               | ION=[M+H]+     |             | 4808.00  | 7806.17  | 16077.83  | 8513.33  |
| 444 | 97.85 | 400.29784  |        |                                                                        |               | ION=[M+H+H]2+  |             | 744.31   | 80.83    | 462.67    | 14858.00 |
| 445 | 97.92 | 568.90207  |        |                                                                        |               | ION=[M+H]+     |             | 168.77   | 361.67   | 583.83    | 830.67   |
| 446 | 97.92 | 446.99867  |        |                                                                        |               | ION=[M+H]+     |             | 48.92    | 81.83    | 1740.67   | 73.67    |
| 447 | 97.93 | 649.53635  |        |                                                                        |               | ION=[M+H]+     |             | 188.15   | 663.00   | 1519.00   | 650.33   |
| 448 | 97.95 | 826.35104  |        |                                                                        |               | ION=[M+H]+     |             | 980.77   | 1311.67  | 868.00    | 229.00   |
| 449 | 97.95 | 612.14879  | 8.491  | Oxiglutatione                                                          | C20H32N6O12S2 | ION=[M+H+H]2+  | 27025-41-8  | 30970.62 | 19369.50 | 178439.00 | 61146.67 |
| 450 | 98.01 | 333.15337  | NA     | 4.8-dimethyl-6-O-(2i.4f-di-O-methyl-?-D-xylopyranosyl)hydroxyquinoline | C18H23NO5     | ION=[M+H]+     |             | 2848.77  | 540.00   | 645.83    | 3254.00  |
| 451 | 98.05 | 932.36605  |        |                                                                        |               | ION=[M+H]+     |             | 3802.00  | 5445.33  | 10783.83  | 7652.67  |
| 452 | 98.09 | 1077.47256 |        |                                                                        |               | ION=[M+H+H]2+  |             | 1344.77  | 3565.33  | 3147.33   | 3357.00  |
| 453 | 98.1  | 546.33452  |        |                                                                        |               | ION=[M+H+H]2+  |             | 2822.31  | 8934.67  | 2182.50   | 3778.67  |
| 454 | 98.12 | 1687.69228 |        |                                                                        |               | ION=[M+H+H2]3+ |             | 861.08   | 793.17   | 2334.50   | 1555.67  |
| 455 | 98.12 | 597.16868  |        |                                                                        |               | ION=[M+H]+     |             | 3.38     | 6067.17  | 4.50      | 0.00     |
| 456 | 98.13 | 1065.94519 |        |                                                                        |               | ION=[M+H+H]2+  |             | 838.00   | 715.33   | 2499.00   | 1323.00  |
| 457 | 98.14 | 1149.63357 |        |                                                                        |               | ION=[M+H+H2]3+ |             | 2105.69  | 3445.17  | 1917.17   | 0.00     |
| 458 | 98.16 | 538.49317  | 15.172 | 4,5-ditridecyl-octanedioic acid                                        | C34H66O4      | ION=[M+H+H2]3+ |             | 14157.69 | 0.00     | 2587.17   | 0.00     |
| 459 | 98.19 | 1287.56315 |        |                                                                        |               | ION=[M+H+H]2+  |             | 332.92   | 486.17   | 2677.17   | 8700.33  |
| 460 | 98.2  | 627.23579  |        |                                                                        |               | ION=[M+H+H]2+  |             | 326.92   | 2790.67  | 0.00      | 0.00     |
| 461 | 98.22 | 374.18358  |        |                                                                        |               | ION=[M+H]+     |             | 2796.15  | 684.50   | 1018.50   | 2405.00  |
| 462 | 98.22 | 542.31764  |        |                                                                        |               | ION=[M+H+H]2+  |             | 2762.62  | 991.50   | 1319.83   | 680.33   |
| 463 | 98.23 | 855.50257  |        |                                                                        |               | ION=[M+H+H2]3+ |             | 3428.31  | 696.67   | 1568.33   | 2722.67  |
| 464 | 98.25 | 608.26654  |        |                                                                        |               | ION=[M+H]+     |             | 1464.31  | 1325.83  | 3482.67   | 2640.00  |
| 465 | 98.29 | 1711.75315 |        |                                                                        |               | ION=[M+H+H2]3+ |             | 1692.46  | 4153.50  | 5267.00   | 4941.33  |
| 466 | 98.31 | 874.4443   |        |                                                                        |               | ION=[M+H+H]2+  |             | 342.00   | 1047.33  | 2356.33   | 0.00     |
| 467 | 98.31 | 344.20589  | NA     | Oxyphencyclimine                                                       | C20H28N2O3    | ION=[M+H]+     | 125-53-1    | 3492.77  | 1320.67  | 703.50    | 2006.67  |
| 468 | 98.32 | 538.73785  |        |                                                                        |               | ION=[M+H]+     |             | 2398.46  | 2140.00  | 6746.83   | 3762.00  |
| 469 | 98.32 | 1520.68671 |        |                                                                        |               | ION=[M+H+H]2+  |             | 338.00   | 798.83   | 1220.00   | 303.67   |
| 470 | 98.32 | 413.17014  |        |                                                                        |               | ION=[M+H]+     |             | 0.00     | 0.00     | 2814.83   | 0.00     |
| 471 | 98.32 | 432.59484  |        |                                                                        |               | ION=[M+H]+     |             | 146.31   | 140.67   | 495.83    | 0.00     |
| 472 | 98.32 | 568.2483   |        |                                                                        |               | ION=[M+H]+     |             | 1150.62  | 747.17   | 3116.67   | 750.67   |
| 473 | 98.32 | 1372.59786 |        |                                                                        |               | ION=[M+H+H]2+  |             | 33.54    | 73.17    | 627.50    | 50.33    |
| 474 | 98.32 | 431.18961  |        |                                                                        |               | ION=[M+H]+     |             | 1418.46  | 1371.33  | 3317.50   | 1996.33  |
| 475 | 98.32 | 568.56822  |        |                                                                        |               | ION=[M+H]+     |             | 567.38   | 0.00     | 1897.17   | 0.00     |
| 476 | 98.32 | 758.33491  |        |                                                                        |               | ION=[M+H]+     |             | 315.54   | 758.83   | 1049.17   | 101.00   |
| 477 | 98.32 | 970.29587  |        |                                                                        |               | ION=[M+H+H2]3+ |             | 1192.15  | 1835.17  | 1809.00   | 16.33    |
| 478 | 98.32 | 1520.18486 |        |                                                                        |               | ION=[M+H+H]2+  |             | 177.23   | 504.83   | 1001.67   | 229.00   |
| 479 | 98.32 | 386.2517   | 3.904  | Circinamide                                                            | C18H34N4O5    | ION=[M+H+H]2+  |             | 482.46   | 290.00   | 205.17    | 34624.00 |
| 480 | 98.34 | 608.46477  |        |                                                                        |               | ION=[M+H]+     |             | 1281.23  | 297.83   | 2042.17   | 649.67   |
| 481 | 98.34 | 519.824    |        |                                                                        |               | ION=[M+H]+     |             | 1650.62  | 669.17   | 3378.17   | 2291.67  |
| 482 | 98.39 | 1299.57016 |        |                                                                        |               | ION=[M+H+H]2+  |             | 2355.69  | 1686.00  | 5402.83   | 4012.67  |

|     |        |            |        |                                                                          |               |               |          |          |          |          |
|-----|--------|------------|--------|--------------------------------------------------------------------------|---------------|---------------|----------|----------|----------|----------|
| 483 | 98.4   | 587.32571  |        |                                                                          |               | ION=[M+H+H]2+ | 1895.23  | 2137.17  | 1971.67  | 1676.00  |
| 484 | 98.4   | 1298.56986 |        |                                                                          |               | ION=[M+H+H]2+ | 670.77   | 1580.67  | 2284.17  | 1441.00  |
| 485 | 98.4   | 437.21965  |        |                                                                          |               | ION=[M+H]+    | 0.00     | 610.50   | 0.00     | 112.33   |
| 486 | 98.41  | 847.85703  |        |                                                                          |               | ION=[M+H+H]2+ | 920.00   | 443.17   | 2349.83  | 592.33   |
| 487 | 98.42  | 1074.4517  |        |                                                                          |               | ION=[M+H+H]2+ | 2932.15  | 2910.17  | 7172.50  | 4738.67  |
| 488 | 98.44  | 313.61734  |        |                                                                          |               | ION=[M+H]+    | 0.00     | 424.17   | 0.00     | 0.00     |
| 489 | 98.44  | 1251.53561 |        |                                                                          |               | ION=[M+H+H]2+ | 1997.23  | 874.83   | 3654.33  | 29.67    |
| 490 | 98.45  | 499.19076  |        |                                                                          |               | ION=[M+H]+    | 16.31    | 18352.67 | 0.00     | 0.00     |
| 491 | 98.45  | 385.3304   |        |                                                                          |               | ION=[M+H+H]2+ | 117.08   | 16409.50 | 73.17    | 0.00     |
| 492 | 98.47  | 555.12642  |        |                                                                          |               | ION=[M+H+H]2+ | 22049.85 | 17822.00 | 52044.17 | 41869.33 |
| 493 | 98.49  | 985.26415  |        |                                                                          |               | ION=[M+H+H]2+ | 1345.69  | 1922.33  | 1849.50  | 541.67   |
| 494 | 98.52  | 2154.95522 |        |                                                                          |               | ION=[M+H+H]2+ | 1394.15  | 1659.00  | 3051.17  | 1530.67  |
| 495 | 98.57  | 1077.96833 |        |                                                                          |               | ION=[M+H+H]2+ | 6156.62  | 5417.17  | 14900.17 | 9068.67  |
| 496 | 98.58  | 578.32297  |        |                                                                          |               | ION=[M+H+H]2+ | 0.00     | 452.67   | 0.00     | 1006.67  |
| 497 | 98.59  | 1295.55776 |        |                                                                          |               | ION=[M+H+H]2+ | 1418.31  | 2407.00  | 3689.00  | 1868.00  |
| 498 | 98.61  | 352.32005  |        |                                                                          |               | ION=[M+H+H]2+ | 521.85   | 0.00     | 0.00     | 0.00     |
| 499 | 98.62  | 986.27895  |        |                                                                          |               | ION=[M+H+H]2+ | 1544.92  | 2270.67  | 3479.17  | 152.33   |
| 500 | 98.63  | 642.3969   |        |                                                                          |               | ION=[M+H+H]2+ | 920.31   | 0.00     | 0.00     | 0.00     |
| 501 | 98.63  | 207.15872  |        |                                                                          |               | ION=[M+H]+    | 390.00   | 0.00     | 0.00     | 0.00     |
| 502 | 98.7   | 448.68822  |        |                                                                          |               | ION=[M+H]+    | 0.00     | 0.00     | 595.50   | 1390.67  |
| 503 | 98.7   | 855.87167  |        |                                                                          |               | ION=[M+H+H]2+ | 1101.85  | 3151.00  | 3280.00  | 2783.67  |
| 504 | 98.7   | 1694.72744 |        |                                                                          |               | ION=[M+H+H]2+ | 1616.46  | 692.50   | 3455.67  | 1619.67  |
| 505 | 98.71  | 716.37638  |        |                                                                          |               | ION=[M+H+H]2+ | 3117.85  | 2713.67  | 4581.83  | 7303.33  |
| 506 | 98.72  | 192.17315  |        |                                                                          |               | ION=[M+H]+    | 2015.08  | 0.00     | 0.00     | 0.00     |
| 507 | 98.75  | 1712.73609 |        |                                                                          |               | ION=[M+H+H]2+ | 9775.08  | 5891.83  | 22134.83 | 14196.67 |
| 508 | 98.79  | 563.41123  |        |                                                                          |               | ION=[M+H+H]2+ | 7186.77  | 0.00     | 0.00     | 0.00     |
| 509 | 98.79  | 1065.44501 |        |                                                                          |               | ION=[M+H+H]2+ | 1358.00  | 992.33   | 3024.00  | 1867.33  |
| 510 | 98.82  | 289.16142  | NA     | 2-[[3-Phenyl-1H-pyrazol-4-yl)methyl]-1,2,3,4-tetrahydroisoquinoline      | C19H19N3      | ION=[M+H]+    | 5087.08  | 1117.50  | 1419.00  | 4324.33  |
| 511 | 98.86  | 1112.9965  |        |                                                                          |               | ION=[M+H+H]2+ | 288.92   | 1388.00  | 2420.17  | 632.00   |
| 512 | 98.87  | 606.29395  |        |                                                                          |               | ION=[M+H+H]2+ | 1035.38  | 1026.83  | 791.33   | 676.33   |
| 513 | 98.94  | 384.34486  |        |                                                                          |               | ION=[M+H+H]2+ | 2442.46  | 1019.67  | 41.83    | 0.00     |
| 514 | 98.97  | 414.32011  |        |                                                                          |               | ION=[M+H+H]2+ | 9593.38  | 0.00     | 7.33     | 0.00     |
| 515 | 98.98  | 431.58307  |        |                                                                          |               | ION=[M+H]+    | 345.38   | 338.50   | 1148.17  | 636.33   |
| 516 | 98.99  | 856.36573  |        |                                                                          |               | ION=[M+H+H]2+ | 6358.00  | 4857.00  | 17339.33 | 6728.67  |
| 517 | 99.06  | 612.28857  |        |                                                                          |               | ION=[M+H+H]2+ | 0.00     | 492.83   | 0.00     | 0.00     |
| 518 | 99.07  | 1068.95645 |        |                                                                          |               | ION=[M+H+H]2+ | 921.85   | 402.50   | 1762.17  | 1109.67  |
| 519 | 99.07  | 2155.93968 |        |                                                                          |               | ION=[M+H+H]2+ | 1583.54  | 1220.00  | 3688.83  | 1927.33  |
| 520 | 99.07  | 1300.06677 |        |                                                                          |               | ION=[M+H+H]2+ | 1332.92  | 1073.67  | 4019.00  | 2755.67  |
| 521 | 99.08  | 502.32853  |        |                                                                          |               | ION=[M+H+H]2+ | 2516.77  | 24.17    | 0.00     | 0.00     |
| 522 | 99.1   | 430.98647  | NA     | Benzthiazide                                                             | C15H14ClN3O4S | ION=[M+H]+    | 519.38   | 1095.50  | 1641.50  | 1116.67  |
| 523 | 99.12  | 643.78131  |        |                                                                          |               | ION=[M+H]+    | 0.00     | 16.50    | 0.00     | 1391.00  |
| 524 | 99.17  | 856.86513  |        |                                                                          |               | ION=[M+H+H]2+ | 3815.85  | 3582.83  | 13869.67 | 6627.33  |
| 525 | 99.2   | 1078.46641 |        |                                                                          |               | ION=[M+H+H]2+ | 4885.08  | 3975.83  | 13733.67 | 7419.00  |
| 526 | 99.28  | 356.20599  |        |                                                                          |               | ION=[M+H]+    | 2644.46  | 1271.67  | 2478.33  | 1582.33  |
| 527 | 99.29  | 328.28458  |        |                                                                          |               | ION=[M+H]+    | 0.00     | 22.00    | 6287.00  | 0.00     |
| 528 | 99.38  | 1296.05656 |        |                                                                          |               | ION=[M+H+H]2+ | 1788.15  | 2184.17  | 4321.17  | 2239.33  |
| 529 | 99.5   | 616.33972  | 31.453 | Aeruginosin A                                                            | C34H44N6O5    | ION=[M+H+H]2+ | 771.54   | 2975.83  | 3347.33  | 11923.00 |
| 530 | 99.52  | 1292.5459  |        |                                                                          |               | ION=[M+H+H]2+ | 1419.85  | 1432.67  | 2555.83  | 1660.67  |
| 531 | 99.53  | 319.1676   |        |                                                                          |               | ION=[M+H]+    | 2204.00  | 0.00     | 313.00   | 3223.00  |
| 532 | 99.55  | 897.37676  |        |                                                                          |               | ION=[M+H+H]2+ | 4911.54  | 8380.17  | 3307.17  | 4705.33  |
| 533 | 99.56  | 607.3035   |        |                                                                          |               | ION=[M+H+H]2+ | 1169.54  | 272.50   | 593.17   | 578.00   |
| 534 | 99.59  | 401.2269   |        |                                                                          |               | ION=[M+H]+    | 4619.54  | 69.17    | 299.67   | 511.33   |
| 535 | 99.59  | 243.64778  |        |                                                                          |               | ION=[M+H]+    | 431.69   | 0.00     | 0.00     | 0.00     |
| 536 | 99.64  | 287.18303  |        |                                                                          |               | ION=[M+H]+    | 4402.62  | 815.17   | 1616.33  | 4067.33  |
| 537 | 99.65  | 1113.9843  |        |                                                                          |               | ION=[M+H+H]2+ | 452.92   | 977.17   | 3007.17  | 790.67   |
| 538 | 99.73  | 844.42459  |        |                                                                          |               | ION=[M+H+H]2+ | 3801.69  | 1812.00  | 1120.00  | 2251.67  |
| 539 | 99.81  | 266.07697  | NA     | 6-Methyl-3-[4-(trifluoromethyl)phenyl]-1H-pyrazolo[5,1-c][1,2,4]triazole | C12H9F3N4     | ION=[M+H]+    | 1121.23  | 3274.00  | 23.83    | 0.00     |
| 540 | 99.86  | 428.27465  |        |                                                                          |               | ION=[M+H+H]2+ | 448.77   | 24.17    | 613.83   | 5018.67  |
| 541 | 99.88  | 248.73278  |        |                                                                          |               | ION=[M+H]+    | 0.00     | 0.00     | 456.67   | 0.00     |
| 542 | 99.88  | 431.38464  |        |                                                                          |               | ION=[M+H]+    | 848.92   | 719.00   | 2896.00  | 1570.67  |
| 543 | 99.88  | 1104.47995 |        |                                                                          |               | ION=[M+H+H]2+ | 0.00     | 87.67    | 2072.83  | 0.00     |
| 544 | 100.01 | 388.19637  |        |                                                                          |               | ION=[M+H]+    | 4814.92  | 1575.33  | 1709.33  | 3423.67  |
| 545 | 100.01 | 482.3301   |        |                                                                          |               | ION=[M+H+H]2+ | 2791.08  | 18.17    | 0.00     | 0.00     |
| 546 | 100.01 | 358.21648  | NA     | Cannabidiolic acid                                                       | C22H30O4      | ION=[M+H]+    | 2581.23  | 513.00   | 263.50   | 2534.33  |
| 547 | 100.08 | 357.29807  |        |                                                                          |               | ION=[M+H+H]2+ | 12.77    | 6158.83  | 46.33    | 125.67   |
| 548 | 100.09 | 235.08929  | 2.025  | S-(d-carboxybutyl)-l-homocysteine                                        | C9H17NO4S     | ION=[M+H]+    | 87.08    | 0.00     | 63.50    | 56751.00 |
| 549 | 100.1  | 1783.77491 |        |                                                                          |               | ION=[M+H+H]2+ | 1016.00  | 984.83   | 2651.83  | 1639.67  |
| 550 | 100.12 | 379.11188  |        |                                                                          |               | ION=[M+H]+    | 3576.15  | 5355.67  | 7641.33  | 4416.67  |
| 551 | 100.15 | 277.60884  |        |                                                                          |               | ION=[M+H]+    | 677.38   | 1784.00  | 2897.17  | 107.67   |
| 552 | 100.19 | 303.17816  | 13.29  | [1-(5-Fluoropentyl)-1H-indazol-3-yl](1-pyrrolidinyl)methanone            | C17H22FN3O    | ION=[M+H]+    | 4921.85  | 912.83   | 1756.67  | 4926.00  |
| 553 | 100.24 | 135.05574  |        |                                                                          |               | ION=[M+H]+    | 4742.46  | 9544.50  | 10922.33 | 12221.67 |



|     |        |            |       |                                                                                        |           |                |           |          |          |          |          |
|-----|--------|------------|-------|----------------------------------------------------------------------------------------|-----------|----------------|-----------|----------|----------|----------|----------|
| 554 | 100.27 | 1286.55648 |       |                                                                                        |           | ION=[M+H+H]2+  |           | 305.54   | 862.50   | 1565.17  | 1206.00  |
| 555 | 100.29 | 613.42088  |       |                                                                                        |           | ION=[M+H+H]2+  |           | 8162.77  | 52.83    | 0.00     | 0.00     |
| 556 | 100.31 | 993.52994  |       |                                                                                        |           | ION=[M+H+H2]3+ |           | 1881.54  | 2748.50  | 3232.17  | 4765.67  |
| 557 | 100.32 | 891.88158  |       |                                                                                        |           | ION=[M+H+H]2+  |           | 905.23   | 869.50   | 2359.17  | 1490.00  |
| 558 | 100.32 | 892.38667  |       |                                                                                        |           | ION=[M+H+H]2+  |           | 922.77   | 1040.83  | 2173.17  | 1178.00  |
| 559 | 100.35 | 924.50675  |       |                                                                                        |           | ION=[M+H+H2]3+ |           | 319.54   | 1198.33  | 0.00     | 0.00     |
| 560 | 100.41 | 258.17394  | NA    | Ergotryptamine                                                                         | C16H22N2O | ION=[M+H]+     |           | 2540.00  | 0.00     | 0.00     | 0.00     |
| 561 | 100.45 | 516.34865  |       |                                                                                        |           | ION=[M+H+H]2+  |           | 10332.46 | 0.00     | 43.50    | 0.00     |
| 562 | 100.63 | 233.12699  |       |                                                                                        |           | ION=[M+H]+     |           | 370.00   | 1399.50  | 0.00     | 8599.33  |
| 563 | 100.68 | 524.22303  |       |                                                                                        |           | ION=[M+H]+     |           | 940.31   | 1067.17  | 1941.00  | 1468.67  |
| 564 | 100.74 | 1296.55217 |       |                                                                                        |           | ION=[M+H+H]2+  |           | 1746.77  | 1715.50  | 3512.50  | 2095.33  |
| 565 | 100.75 | 502.205    |       |                                                                                        |           | ION=[M+H+H]2+  |           | 528.31   | 0.00     | 0.00     | 0.00     |
| 566 | 100.83 | 1753.7663  |       |                                                                                        |           | ION=[M+H+H2]3+ |           | 540.92   | 1321.50  | 2426.33  | 2288.67  |
| 567 | 100.93 | 317.10811  | NA    | Oxyphenisatin                                                                          | C20H15NO3 | ION=[M+H]+     | 125-13-3  | 1411.54  | 0.00     | 985.33   | 0.00     |
| 568 | 100.93 | 179.52995  |       |                                                                                        |           | ION=[M+H]+     |           | 1257.23  | 874.33   | 168.83   | 0.00     |
| 569 | 100.93 | 972.49001  |       |                                                                                        |           | ION=[M+H+H]2+  |           | 1048.92  | 320.17   | 104.17   | 759.00   |
| 570 | 100.93 | 303.65453  |       |                                                                                        |           | ION=[M+H]+     |           | 438.92   | 28.50    | 5.33     | 44.67    |
| 571 | 100.94 | 436.25411  |       |                                                                                        |           | ION=[M+H+H]2+  |           | 3578.62  | 0.00     | 843.33   | 0.00     |
| 572 | 101.01 | 201.10151  | NA    | (3 <sup>h</sup> -hydroxybutan-20-yl)-5-oxopyrrolidine-2-carboxylate                    | C9H15NO4  | ION=[M+H]+     |           | 55.85    | 4246.83  | 782.17   | 516.67   |
| 573 | 101.04 | 1113.48316 |       |                                                                                        |           | ION=[M+H+H]2+  |           | 674.77   | 1123.00  | 3130.00  | 915.67   |
| 574 | 101.13 | 112.02673  |       |                                                                                        |           | ION=[M+H]+     |           | 8888.92  | 4251.50  | 6510.17  | 10556.00 |
| 575 | 101.15 | 293.13239  | NA    | Dnc007141                                                                              | C18H16FN3 | ION=[M+H]+     |           | 1740.15  | 670.67   | 1538.83  | 3153.00  |
| 576 | 101.24 | 342.29998  |       |                                                                                        |           | ION=[M+H]+     |           | 0.00     | 0.00     | 11689.50 | 0.00     |
| 577 | 101.25 | 300.14446  |       |                                                                                        |           | ION=[M+H]+     |           | 174.46   | 3988.17  | 948.33   | 15468.00 |
| 578 | 101.26 | 155.09535  | NA    | Arecoline                                                                              | C8H13NO2  | ION=[M+H]+     |           | 36.00    | 0.00     | 5693.17  | 25.67    |
| 579 | 101.29 | 317.16017  |       |                                                                                        |           | ION=[M+H]+     |           | 3639.38  | 784.17   | 1851.17  | 3316.33  |
| 580 | 101.4  | 455.30919  |       |                                                                                        |           | ION=[M+H+H]2+  |           | 164.62   | 106.00   | 87.33    | 12247.33 |
| 581 | 101.45 | 415.20817  |       |                                                                                        |           | ION=[M+H]+     |           | 305.54   | 4016.83  | 1337.67  | 18625.00 |
| 582 | 101.49 | 442.32786  |       |                                                                                        |           | ION=[M+H+H]2+  |           | 48888.00 | 0.00     | 0.00     | 0.00     |
| 583 | 101.5  | 218.12719  | 9.513 | Meprobamate                                                                            | C9H18N2O4 | ION=[M+H]+     | 57-53-4   | 24252.31 | 7853.33  | 7645.00  | 15393.67 |
| 584 | 101.54 | 705.36455  |       |                                                                                        |           | ION=[M+H+H]2+  |           | 1452.77  | 97.00    | 66.67    | 164.33   |
| 585 | 101.59 | 571.21672  |       |                                                                                        |           | ION=[M+H]+     |           | 0.00     | 5654.00  | 118.83   | 197.33   |
| 586 | 101.67 | 617.36916  |       |                                                                                        |           | ION=[M+H+H]2+  |           | 6775.08  | 20218.50 | 1033.50  | 912.33   |
| 587 | 101.95 | 2148.91393 |       |                                                                                        |           | ION=[M+H+H2]3+ |           | 1320.62  | 1794.50  | 3276.67  | 1012.00  |
| 588 | 102.01 | 333.18676  |       |                                                                                        |           | ION=[M+H]+     |           | 2101.38  | 0.00     | 907.33   | 2745.00  |
| 589 | 102.16 | 558.27726  |       |                                                                                        |           | ION=[M+H+H]2+  |           | 357.23   | 169.00   | 58.17    | 10383.33 |
| 590 | 102.21 | 488.14587  |       |                                                                                        |           | ION=[M+H+H]2+  |           | 0.00     | 0.00     | 1001.50  | 0.00     |
| 591 | 102.5  | 311.29155  |       |                                                                                        |           | ION=[M+H+H]2+  |           | 8232.77  | 0.00     | 117.00   | 25.67    |
| 592 | 102.58 | 665.27972  |       |                                                                                        |           | ION=[M+H]+     |           | 1895.54  | 2874.00  | 4493.83  | 3409.00  |
| 593 | 102.64 | 443.88164  |       |                                                                                        |           | ION=[M+H+H]2+  |           | 8949.38  | 27.00    | 0.00     | 0.00     |
| 594 | 102.96 | 428.28824  |       |                                                                                        |           | ION=[M+H+H]2+  |           | 150.00   | 0.00     | 0.00     | 5539.67  |
| 595 | 103.01 | 735.41018  |       |                                                                                        |           | ION=[M+H+H2]3+ |           | 85.23    | 119.00   | 441.33   | 0.00     |
| 596 | 103.05 | 595.36513  |       |                                                                                        |           | ION=[M+H+H]2+  |           | 20.77    | 0.00     | 2499.67  | 0.00     |
| 597 | 103.24 | 402.21143  |       |                                                                                        |           | ION=[M+H]+     |           | 1352.62  | 266.83   | 378.17   | 10619.33 |
| 598 | 103.44 | 720.36046  |       |                                                                                        |           | ION=[M+H+H]2+  |           | 1852.92  | 70.83    | 202.17   | 0.00     |
| 599 | 103.53 | 390.17994  | NA    | 3-{3-[(2E)-3,7-Dimethyl-2,6-octadien-1-yl]-4-hydroxyphenyl}-7-hydroxy-4H-chromen-4-one | C25H26O4  | ION=[M+H]+     |           | 1346.46  | 394.17   | 430.17   | 1584.00  |
| 600 | 103.67 | 345.00289  |       |                                                                                        |           | ION=[M+H]+     |           | 1865.85  | 2259.17  | 2825.67  | 944.33   |
| 601 | 103.77 | 146.04367  |       |                                                                                        |           | ION=[M+H]+     |           | 0.00     | 0.00     | 27280.00 | 0.00     |
| 602 | 103.94 | 1108.47275 |       |                                                                                        |           | ION=[M+H+H]2+  |           | 847.54   | 782.33   | 3310.00  | 2113.33  |
| 603 | 103.98 | 777.45955  |       |                                                                                        |           | ION=[M+H+H2]3+ |           | 841.54   | 55.00    | 0.00     | 0.00     |
| 604 | 104.28 | 276.13143  |       |                                                                                        |           | ION=[M+H]+     |           | 2452.15  | 487.17   | 2788.67  | 2762.67  |
| 605 | 104.29 | 595.18935  |       |                                                                                        |           | ION=[M+H]+     |           | 0.00     | 5029.00  | 0.00     | 0.00     |
| 606 | 104.32 | 694.1635   |       |                                                                                        |           | ION=[M+H+H]2+  |           | 586.46   | 810.67   | 2526.83  | 71.33    |
| 607 | 104.6  | 615.27444  |       |                                                                                        |           | ION=[M+H]+     |           | 174.46   | 33267.83 | 214.17   | 392.00   |
| 608 | 104.75 | 650.20554  |       |                                                                                        |           | ION=[M+H]+     |           | 581.38   | 34.00    | 4923.50  | 695.00   |
| 609 | 104.78 | 361.18307  |       |                                                                                        |           | ION=[M+H]+     |           | 2986.15  | 809.33   | 1046.83  | 2248.67  |
| 610 | 104.95 | 718.35589  |       |                                                                                        |           | ION=[M+H+H]2+  |           | 930.00   | 214.17   | 282.83   | 378.33   |
| 611 | 105.23 | 221.1025   | 8.525 | Metaxalone                                                                             | C12H15NO3 | ION=[M+H]+     | 1665-48-1 | 3361.08  | 786.83   | 1150.83  | 1387.67  |
| 612 | 105.56 | 186.1745   |       |                                                                                        |           | ION=[M+H]+     |           | 3839.54  | 0.00     | 11.17    | 0.00     |
| 613 | 105.63 | 540.33093  |       |                                                                                        |           | ION=[M+H]+     |           | 9126.46  | 0.00     | 0.00     | 0.00     |
| 614 | 105.88 | 507.27701  |       |                                                                                        |           | ION=[M+H+H]2+  |           | 1830.15  | 121.50   | 720.83   | 312.00   |
| 615 | 106.26 | 389.18129  |       |                                                                                        |           | ION=[M+H]+     |           | 930.92   | 1665.50  | 940.50   | 1286.33  |
| 616 | 106.4  | 436.96593  |       |                                                                                        |           | ION=[M+H]+     |           | 1599.85  | 2368.83  | 1015.17  | 52.33    |
| 617 | 106.46 | 568.3517   |       |                                                                                        |           | ION=[M+H]+     |           | 4540.62  | 10.17    | 0.00     | 0.00     |
| 618 | 106.47 | 394.11216  |       |                                                                                        |           | ION=[M+H+H]2+  |           | 546.31   | 1586.00  | 2945.33  | 1006.67  |
| 619 | 106.62 | 686.37046  |       |                                                                                        |           | ION=[M+H+H]2+  |           | 1818.15  | 2125.83  | 371.33   | 287.00   |
| 620 | 106.66 | 910.32642  |       |                                                                                        |           | ION=[M+H+H]2+  |           | 1018.00  | 172.33   | 0.00     | 0.00     |
| 621 | 106.7  | 421.99933  |       |                                                                                        |           | ION=[M+H+H]2+  |           | 782.15   | 1218.67  | 430.33   | 0.00     |
| 622 | 106.8  | 543.26518  |       |                                                                                        |           | ION=[M+H]+     |           | 0.00     | 698.33   | 0.00     | 3397.33  |
| 623 | 106.8  | 252.18413  |       |                                                                                        |           | ION=[M+H]+     |           | 0.00     | 0.00     | 25.50    | 3941.00  |
| 624 | 106.8  | 455.16406  |       |                                                                                        |           | ION=[M+H]+     |           | 4952.00  | 1558.17  | 6597.17  | 6797.33  |
| 625 | 106.97 | 189.06521  | 9.351 | N-Acetyl-DL-glutamic acid                                                              | C7H11NO5  | ION=[M+H]+     |           | 1564.00  | 1074.50  | 3857.83  | 1904.00  |

|     |        |            |        |                                                                                               |              |               |              |          |         |          |          |
|-----|--------|------------|--------|-----------------------------------------------------------------------------------------------|--------------|---------------|--------------|----------|---------|----------|----------|
| 626 | 107.2  | 450.25838  |        |                                                                                               |              | ION=[M+H+H]2+ |              | 143.69   | 128.83  | 83.00    | 3883.33  |
| 627 | 107.55 | 261.5407   |        |                                                                                               |              | ION=[M+H]+    |              | 646.00   | 995.00  | 1490.17  | 0.00     |
| 628 | 107.68 | 494.2505   |        |                                                                                               |              | ION=[M+H+H]2+ |              | 102.15   | 52.33   | 0.00     | 5615.33  |
| 629 | 107.72 | 523.08191  |        |                                                                                               |              | ION=[M+H+H]2+ |              | 1076.77  | 0.00    | 159.67   | 0.00     |
| 630 | 107.82 | 507.12222  |        |                                                                                               |              | ION=[M+H]+    |              | 2106.46  | 2006.67 | 1391.17  | 0.00     |
| 631 | 107.92 | 322.08374  |        |                                                                                               |              | ION=[M+H]+    |              | 0.00     | 2411.00 | 0.00     | 85.67    |
| 632 | 108.03 | 174.53341  |        |                                                                                               |              | ION=[M+H]+    |              | 2002.15  | 814.33  | 1484.67  | 84.67    |
| 633 | 108.36 | 408.10501  |        |                                                                                               |              | ION=[M+H+H]2+ |              | 2343.54  | 965.83  | 2124.83  | 0.00     |
| 634 | 108.37 | 624.16443  |        |                                                                                               |              | ION=[M+H+H]2+ |              | 2005.08  | 281.33  | 1734.50  | 0.00     |
| 635 | 108.45 | 390.09062  |        |                                                                                               |              | ION=[M+H+H]2+ |              | 1899.69  | 1181.17 | 2597.50  | 609.33   |
| 636 | 108.56 | 349.06583  |        |                                                                                               |              | ION=[M+H+H]2+ |              | 0.00     | 0.00    | 426.67   | 22.33    |
| 637 | 108.95 | 586.21684  |        |                                                                                               |              | ION=[M+H+H]2+ |              | 0.00     | 1165.83 | 0.00     | 0.00     |
| 638 | 109.4  | 561.19222  |        |                                                                                               |              | ION=[M+H]+    |              | 4238.46  | 106.33  | 2594.50  | 1707.00  |
| 639 | 109.51 | 276.07605  | NA     | Clenbuterol                                                                                   | C12H18Cl2N2O | ION=[M+H]+    |              | 708.31   | 242.67  | 0.00     | 0.00     |
| 640 | 109.51 | 741.13077  |        |                                                                                               |              | ION=[M+H]+    |              | 1080.62  | 1234.50 | 1029.33  | 0.00     |
| 641 | 109.71 | 811.2894   |        |                                                                                               |              | ION=[M+H]+    |              | 1529.08  | 981.83  | 2408.67  | 0.00     |
| 642 | 109.91 | 827.24263  |        |                                                                                               |              | ION=[M+H+H]2+ |              | 3448.00  | 1558.17 | 4294.00  | 126.00   |
| 643 | 110.19 | 1014.36987 |        |                                                                                               |              | ION=[M+H]+    |              | 1062.31  | 1291.17 | 2361.33  | 0.00     |
| 644 | 110.3  | 726.15991  |        |                                                                                               |              | ION=[M+H+H]2+ |              | 2465.54  | 2737.67 | 2828.17  | 60.67    |
| 645 | 110.49 | 549.10413  |        |                                                                                               |              | ION=[M+H]+    |              | 1737.08  | 1919.50 | 2907.67  | 986.00   |
| 646 | 110.56 | 550.10639  |        |                                                                                               |              | ION=[M+H+H]2+ |              | 0.00     | 1028.83 | 964.17   | 0.00     |
| 647 | 110.59 | 802.21151  |        |                                                                                               |              | ION=[M+H+H]2+ |              | 1513.54  | 78.00   | 1584.67  | 20.00    |
| 648 | 110.59 | 536.16369  |        |                                                                                               |              | ION=[M+H]+    |              | 2627.38  | 58.83   | 1392.83  | 347.33   |
| 649 | 110.66 | 552.1438   |        |                                                                                               |              | ION=[M+H+H]2+ |              | 2556.15  | 4096.67 | 5465.33  | 0.00     |
| 650 | 110.73 | 534.13353  |        |                                                                                               |              | ION=[M+H+H]2+ |              | 2497.54  | 3288.17 | 4519.50  | 0.00     |
| 651 | 110.78 | 570.15537  |        |                                                                                               |              | ION=[M+H+H]2+ |              | 3458.77  | 5077.33 | 6087.33  | 246.33   |
| 652 | 110.81 | 1030.32158 |        |                                                                                               |              | ION=[M+H+H]2+ |              | 3743.69  | 5537.33 | 6431.67  | 132.00   |
| 653 | 110.97 | 764.27486  | 13.782 | Boholmycin                                                                                    | C27H48N4O21  | ION=[M+H]+    |              | 3961.69  | 110.00  | 2602.17  | 1608.00  |
| 654 | 110.99 | 478.32923  |        |                                                                                               |              | ION=[M+H]+    |              | 1463.85  | 0.00    | 0.00     | 0.00     |
| 655 | 111.15 | 593.17175  |        |                                                                                               |              | ION=[M+H+H]2+ |              | 2272.92  | 3081.67 | 3712.50  | 229.33   |
| 656 | 111.2  | 231.11111  |        |                                                                                               |              | ION=[M+H]+    |              | 0.00     | 5976.33 | 1373.00  | 2092.33  |
| 657 | 111.59 | 694.12799  |        |                                                                                               |              | ION=[M+H+H]2+ |              | 0.00     | 0.00    | 0.00     | 926.00   |
| 658 | 111.99 | 1190.36002 |        |                                                                                               |              | ION=[M+H+H]2+ |              | 0.00     | 254.50  | 1842.17  | 0.00     |
| 659 | 112.06 | 494.17485  | 36.487 |                                                                                               |              | ION=[M+H]+    |              | 1067.38  | 1582.17 | 5427.00  | 3087.00  |
| 660 | 112.06 | 712.17664  |        |                                                                                               |              | ION=[M+H+H]2+ |              | 730.31   | 1141.17 | 2848.17  | 0.00     |
| 661 | 112.1  | 1056.50209 |        |                                                                                               |              | ION=[M+H+H]2+ |              | 2242.31  | 38.50   | 15.50    | 70.00    |
| 662 | 112.29 | 779.28801  |        |                                                                                               |              | ION=[M+H]+    |              | 1277.23  | 1471.17 | 670.67   | 1045.00  |
| 663 | 112.43 | 275.05423  | NA     | Nifuroxazide                                                                                  | C12H9N3O5    | ION=[M+H]+    |              | 1619.85  | 1105.50 | 1718.50  | 0.00     |
| 664 | 112.76 | 462.22288  |        |                                                                                               |              | ION=[M+H+H]2+ |              | 0.00     | 0.00    | 1433.50  | 0.00     |
| 665 | 114.16 | 430.26139  |        |                                                                                               |              | ION=[M+H+H]2+ |              | 21.85    | 12.83   | 0.00     | 11304.67 |
| 666 | 114.51 | 340.19975  | 15.65  | 2-[(2-aminocyclohexyl)amino]-4-[[3-methylphenyl)amino]pyrimidine-5-carboxamide                | C18H24N6O    | ION=[M+H]+    | 1194961-19-7 | 0.00     | 0.00    | 0.00     | 8781.00  |
| 667 | 114.81 | 261.10353  |        |                                                                                               |              | ION=[M+H]+    |              | 0.00     | 0.00    | 0.00     | 44972.33 |
| 668 | 115.15 | 126.0424   | 3.841  | Imidazoleacetic acid                                                                          | C5H6N2O2     | ION=[M+H]+    |              | 129.23   | 2510.00 | 572.33   | 42.00    |
| 669 | 115.89 | 359.20569  |        |                                                                                               |              | ION=[M+H]+    |              | 2961.23  | 1018.00 | 1117.50  | 843.33   |
| 670 | 118.38 | 299.18416  |        |                                                                                               |              | ION=[M+H]+    |              | 2281.69  | 57.33   | 929.33   | 680.33   |
| 671 | 118.62 | 265.11599  | 15.067 | 3-fluoro-4-hydroxybenzaldehyde o-(cyclohexylcarbonyl)oxime                                    | C14H16FNO3   | ION=[M+H]+    |              | 0.00     | 4347.50 | 1329.33  | 0.00     |
| 672 | 119.11 | 229.09588  | 13.887 | 2-(pyrido[1,2-E]purin-4-Yl)amino-Ethanol                                                      | C11H11N5O    | ION=[M+H]+    |              | 1369.38  | 2007.33 | 3364.17  | 743.33   |
| 673 | 119.17 | 117.07845  | 4.754  | L(+)-norvaline   L-norvaline                                                                  | C5H11NO2     | ION=[M+H]+    |              | 2522.00  | 3504.17 | 5461.00  | 1350.00  |
| 674 | 119.33 | 398.2887   | 35.992 | Hermitamide B                                                                                 | C25H38N2O2   | ION=[M+H+H]2+ |              | 0.00     | 0.00    | 7.83     | 6939.67  |
| 675 | 119.75 | 391.28418  |        |                                                                                               |              | ION=[M+H+H]2+ |              | 0.00     | 1546.00 | 0.00     | 0.00     |
| 676 | 120.59 | 363.05755  |        |                                                                                               |              | ION=[M+H]+    |              | 751.38   | 6788.00 | 2669.50  | 609.33   |
| 677 | 120.6  | 348.03342  |        |                                                                                               |              | ION=[M+H+H]2+ |              | 95.08    | 401.67  | 427.00   | 0.00     |
| 678 | 121.31 | 165.07946  | 7.075  | D-Phenylalanine                                                                               | C9H11NO2     | ION=[M+H]+    |              | 22562.62 | 7807.00 | 15780.83 | 8926.33  |
| 679 | 122.15 | 199.14443  |        |                                                                                               |              | ION=[M+H]+    |              | 0.00     | 0.00    | 0.00     | 1725.33  |
| 680 | 123.97 | 534.27231  |        |                                                                                               |              | ION=[M+H]+    |              | 2168.77  | 0.00    | 5.50     | 0.00     |
| 681 | 124.13 | 485.17514  |        |                                                                                               |              | ION=[M+H]+    |              | 2162.00  | 82.00   | 4514.50  | 2776.33  |
| 682 | 126.05 | 513.20609  | 17.226 | Validamycin B                                                                                 | C20H35NO14   | ION=[M+H]+    |              | 3.54     | 3902.67 | 11.17    | 36.33    |
| 683 | 126.13 | 258.1937   | 14.549 | Cyclopenta[g]-2-benzopyran, 1,3,4,6,7,8-hexahydro-4,6,6,7,8,8-hexamethyl-                     | C18H26O      | ION=[M+H]+    |              | 3816.15  | 17.17   | 10.50    | 50.67    |
| 684 | 126.26 | 456.36217  |        |                                                                                               |              | ION=[M+H+H]2+ |              | 8791.85  | 246.50  | 0.00     | 0.00     |
| 685 | 126.7  | 280.14166  | 12.016 | Bohemamine E                                                                                  | C14H20N2O4   | ION=[M+H]+    |              | 3881.85  | 91.00   | 673.67   | 2498.67  |
| 686 | 129.21 | 1012.31975 |        |                                                                                               |              | ION=[M+H+H]2+ |              | 2669.69  | 1791.00 | 6010.17  | 3334.00  |
| 687 | 130.89 | 290.1661   |        |                                                                                               |              | ION=[M+H]+    |              | 41868.46 | 21.17   | 16.17    | 168.00   |
| 688 | 131.88 | 278.09385  | 24.091 | Pukeleimide A                                                                                 | C13H14N2O5   | ION=[M+H]+    |              | 6391.69  | 9178.50 | 15745.50 | 9722.33  |
| 689 | 132.5  | 950.36649  |        |                                                                                               |              | ION=[M+H]+    |              | 333.54   | 0.00    | 12.00    | 12811.33 |
| 690 | 134.09 | 265.09526  |        |                                                                                               |              | ION=[M+H]+    |              | 2203.38  | 896.50  | 1169.00  | 560.33   |
| 691 | 134.44 | 279.12262  | NA     | Nicotinaldehyde N-(6,7-dihydro-5H-cyclopenta[d][1,2,4]triazolo[1,5-a]pyrimidin-8-yl)hydrazone | C14H13N7     | ION=[M+H]+    |              | 3886.00  | 328.33  | 632.50   | 2533.00  |
| 692 | 141.48 | 160.0376   | 8.878  | 3,4-dihydroxy-3,4-dihydro-2h-pyran-6-carboxylic acid                                          | C6H8O5       | ION=[M+H]+    |              | 1245.69  | 625.50  | 2362.50  | 1871.00  |

|     |        |            |        |                                                                                                                                                            |             |                           |             |          |          |          |          |
|-----|--------|------------|--------|------------------------------------------------------------------------------------------------------------------------------------------------------------|-------------|---------------------------|-------------|----------|----------|----------|----------|
| 693 | 141.89 | 618.2139   |        |                                                                                                                                                            |             | ION=[M+H] <sup>+</sup>    |             | 1530.92  | 8.50     | 33045.50 | 2317.33  |
| 694 | 143.26 | 239.10244  | 8.24   | 7,8-Dihydrobiopterin                                                                                                                                       | C9H13N5O3   | ION=[M+H] <sup>+</sup>    |             | 98.46    | 0.00     | 2733.67  | 106.67   |
| 695 | 144.83 | 336.13224  |        |                                                                                                                                                            |             | ION=[M+H] <sup>+</sup>    |             | 836.00   | 2853.17  | 630.67   | 887.67   |
| 696 | 145.11 | 236.11599  | 19.246 | Carbetamide                                                                                                                                                | C12H16N2O3  | ION=[M+H] <sup>+</sup>    | 16118-49-3  | 8967.54  | 1064.83  | 2453.17  | 6572.00  |
| 697 | 145.38 | 237.08785  | 9.88   | Biopterin                                                                                                                                                  | C9H11N5O3   | ION=[M+H] <sup>+</sup>    |             | 2749.85  | 27.00    | 7176.00  | 2382.00  |
| 698 | 145.8  | 654.1402   |        |                                                                                                                                                            |             | ION=[M+H+H] <sup>2+</sup> |             | 1632.77  | 10.83    | 2527.00  | 185.00   |
| 699 | 146.47 | 428.27333  |        |                                                                                                                                                            |             | ION=[M+H+H] <sup>2+</sup> |             | 0.00     | 25.17    | 0.00     | 17313.67 |
| 700 | 146.53 | 185.07015  | 12.978 | Alaremycin                                                                                                                                                 | C8H11NO4    | ION=[M+H] <sup>+</sup>    |             | 3166.46  | 751.17   | 2359.33  | 2966.67  |
| 701 | 146.71 | 550.20131  |        |                                                                                                                                                            |             | ION=[M+H] <sup>+</sup>    |             | 4264.46  | 98.17    | 410.33   | 2307.67  |
| 702 | 148.16 | 379.11153  |        |                                                                                                                                                            |             | ION=[M+H] <sup>+</sup>    |             | 2135.69  | 31.00    | 5385.00  | 2029.33  |
| 703 | 148.66 | 266.12667  | 15.61  | 2-{2-Oxo-2-[4-(1H-pyrrol-1-yl)piperidino]ethoxy}acetic acid                                                                                                | C13H18N2O4  | ION=[M+H] <sup>+</sup>    |             | 2815.69  | 977.67   | 1259.33  | 2312.67  |
| 704 | 149.33 | 235.09202  | NA     | S-(d-carboxybutyl)-l-homocysteine                                                                                                                          | C9H17NO4S   | ION=[M+H] <sup>+</sup>    |             | 1544.00  | 1710.00  | 1295.33  | 3957.33  |
| 705 | 151.53 | 385.33005  |        |                                                                                                                                                            |             | ION=[M+H+H] <sup>2+</sup> |             | 0.00     | 2972.00  | 0.00     | 0.00     |
| 706 | 154.21 | 274.10305  |        |                                                                                                                                                            |             | ION=[M+H] <sup>+</sup>    |             | 30.31    | 1990.17  | 0.00     | 92.67    |
| 707 | 154.28 | 463.24146  |        |                                                                                                                                                            |             | ION=[M+H] <sup>+</sup>    |             | 0.00     | 5595.00  | 0.00     | 1473.00  |
| 708 | 154.44 | 306.12519  |        |                                                                                                                                                            |             | ION=[M+H] <sup>+</sup>    |             | 650.00   | 431.67   | 3973.17  | 167.00   |
| 709 | 156.39 | 126.04233  | 12.172 | Imidazoleacetic acid                                                                                                                                       | C5H6N2O2    | ION=[M+H] <sup>+</sup>    |             | 3155.69  | 1109.33  | 1951.83  | 4599.67  |
| 710 | 156.39 | 355.14821  |        |                                                                                                                                                            |             | ION=[M+H] <sup>+</sup>    |             | 2048.31  | 1941.67  | 84.67    | 1401.33  |
| 711 | 157.64 | 264.07215  | 17.226 | Streptomycamide B                                                                                                                                          | C12H12N2O5  | ION=[M+H] <sup>+</sup>    |             | 1073.85  | 1295.33  | 2496.50  | 416.67   |
| 712 | 158.18 | 597.22634  |        |                                                                                                                                                            |             | ION=[M+H+H] <sup>2+</sup> |             | 34.62    | 2356.50  | 0.00     | 0.00     |
| 713 | 160.58 | 210.99981  |        |                                                                                                                                                            |             | ION=[M+H] <sup>+</sup>    |             | 0.00     | 692.67   | 847.67   | 0.00     |
| 714 | 160.71 | 370.01436  |        |                                                                                                                                                            |             | ION=[M+H] <sup>+</sup>    |             | 132.31   | 3291.17  | 6829.33  | 203.00   |
| 715 | 160.72 | 237.02557  |        |                                                                                                                                                            |             | ION=[M+H] <sup>+</sup>    |             | 3.69     | 1243.67  | 2593.17  | 0.00     |
| 716 | 160.8  | 201.99462  |        |                                                                                                                                                            |             | ION=[M+H] <sup>+</sup>    |             | 0.00     | 0.00     | 763.00   | 0.00     |
| 717 | 161.15 | 559.99165  |        |                                                                                                                                                            |             | ION=[M+H+H] <sup>2+</sup> |             | 11.69    | 7082.83  | 17471.83 | 0.00     |
| 718 | 161.25 | 574.96261  |        |                                                                                                                                                            |             | ION=[M+H] <sup>+</sup>    |             | 0.00     | 3378.83  | 7325.00  | 9.67     |
| 719 | 161.69 | 418.955    |        |                                                                                                                                                            |             | ION=[M+H] <sup>+</sup>    |             | 18.46    | 1800.00  | 2712.00  | 23.00    |
| 720 | 162.02 | 476.33313  | 4.536  | Cybastacine A                                                                                                                                              | C26H44N4O4  | ION=[M+H+H] <sup>2+</sup> |             | 22986.31 | 0.00     | 0.00     | 0.00     |
| 721 | 162.13 | 312.01803  |        |                                                                                                                                                            |             | ION=[M+H+H] <sup>2+</sup> |             | 0.00     | 441.17   | 2050.50  | 0.00     |
| 722 | 162.49 | 313.96091  |        |                                                                                                                                                            |             | ION=[M+H] <sup>+</sup>    |             | 52.62    | 1663.67  | 1249.67  | 85.33    |
| 723 | 162.53 | 298.61331  |        |                                                                                                                                                            |             | ION=[M+H] <sup>+</sup>    |             | 146.92   | 1094.50  | 13.50    | 0.00     |
| 724 | 164    | 627.92172  |        |                                                                                                                                                            |             | ION=[M+H+H] <sup>2+</sup> |             | 8.62     | 1479.67  | 2318.00  | 32.00    |
| 725 | 165.19 | 363.05791  | 9.815  | 5'-Guanylic acid                                                                                                                                           | C10H14N5O8P | ION=[M+H] <sup>+</sup>    |             | 157.69   | 6767.00  | 936.33   | 818.00   |
| 726 | 165.55 | 599.24052  | 9.588  | Methyl 4-[[4-(dimethylamino)-5-hydroxy-6-methyloxan-2-yl]oxy]-2-ethyl-2,5,12-trihydroxy-7-methoxy-6,11-dioxo-1,2,3,4,6,11-hexahydrotetracene-1-carboxylate | C31H37NO11  | ION=[M+H+H] <sup>2+</sup> |             | 427.54   | 77009.83 | 0.00     | 0.00     |
| 727 | 166.02 | 581.23086  |        |                                                                                                                                                            |             | ION=[M+H+H] <sup>2+</sup> |             | 112.92   | 10894.50 | 5.83     | 0.00     |
| 728 | 166.35 | 556.23539  | 8.969  | N-[1,3-bis(morpholin-4-yl)propan-2-yl]-3-nitro-5-[[3,4,5-trihydroxy-6-(hydroxymethyl)oxan-2-yl]oxy]benzamide                                               | C24H36N4O11 | ION=[M+H+H] <sup>2+</sup> |             | 142.92   | 5842.17  | 18.50    | 303.00   |
| 729 | 166.69 | 151.04952  | 3.54   | Guanine                                                                                                                                                    | C5H5N5O     | ION=[M+H] <sup>+</sup>    |             | 234.77   | 3219.67  | 548.83   | 415.67   |
| 730 | 168.58 | 443.1288   |        |                                                                                                                                                            |             | ION=[M+H] <sup>+</sup>    |             | 372.46   | 892.17   | 1698.83  | 6766.33  |
| 731 | 168.78 | 294.12167  | 15.253 | Aspartame                                                                                                                                                  | C14H18N2O5  | ION=[M+H] <sup>+</sup>    |             | 2871.54  | 733.50   | 1035.33  | 1337.67  |
| 732 | 169.4  | 208.06132  |        |                                                                                                                                                            |             | ION=[M+H] <sup>+</sup>    |             | 3274.15  | 2091.83  | 2579.50  | 3005.33  |
| 733 | 169.88 | 506.15647  |        |                                                                                                                                                            |             | ION=[M+H] <sup>+</sup>    |             | 271.54   | 589.50   | 959.67   | 59.67    |
| 734 | 170.65 | 456.36232  |        |                                                                                                                                                            |             | ION=[M+H+H] <sup>2+</sup> |             | 1181.08  | 0.00     | 0.00     | 0.00     |
| 735 | 172.13 | 290.1664   | NA     | 2-(1-{2-Oxo-2-[(2-pyridinylmethyl)amino]ethyl}cyclohexyl)acetic acid                                                                                       | C16H22N2O3  | ION=[M+H] <sup>+</sup>    |             | 138.77   | 2822.33  | 0.00     | 0.00     |
| 736 | 172.48 | 228.18113  |        |                                                                                                                                                            |             | ION=[M+H] <sup>+</sup>    |             | 1576.31  | 9.33     | 0.00     | 0.00     |
| 737 | 173.07 | 315.21451  |        |                                                                                                                                                            |             | ION=[M+H] <sup>+</sup>    |             | 2175.69  | 383.00   | 553.33   | 1600.00  |
| 738 | 174    | 996.34719  |        |                                                                                                                                                            |             | ION=[M+H+H] <sup>2+</sup> |             | 75.85    | 403.50   | 1289.00  | 73.00    |
| 739 | 174    | 1012.31355 |        |                                                                                                                                                            |             | ION=[M+H+H] <sup>2+</sup> |             | 118.31   | 90.33    | 1776.17  | 0.00     |
| 740 | 174.04 | 462.32076  |        |                                                                                                                                                            |             | ION=[M+H+H] <sup>2+</sup> |             | 2153.23  | 0.00     | 49.50    | 0.00     |
| 741 | 174.6  | 540.23954  |        |                                                                                                                                                            |             | ION=[M+H+H] <sup>2+</sup> |             | 43.69    | 2459.17  | 0.00     | 0.00     |
| 742 | 176.08 | 974.36386  |        |                                                                                                                                                            |             | ION=[M+H+H] <sup>2+</sup> |             | 674.77   | 2114.00  | 6214.67  | 3077.00  |
| 743 | 177.37 | 803.43232  |        |                                                                                                                                                            |             | ION=[M+H+H] <sup>2+</sup> |             | 75.85    | 1782.33  | 282.50   | 137.33   |
| 744 | 177.43 | 1010.42248 |        |                                                                                                                                                            |             | ION=[M+H+H] <sup>2+</sup> |             | 1584.15  | 94.17    | 3095.50  | 540.00   |
| 745 | 178.45 | 418.2419   | 19.028 | Bisucaberin B                                                                                                                                              | C18H34N4O7  | ION=[M+H] <sup>+</sup>    |             | 2386.31  | 1165.50  | 929.17   | 140.33   |
| 746 | 180.35 | 565.23538  | 12.528 | Pyripropene S                                                                                                                                              | C31H35NO9   | ION=[M+H+H] <sup>2+</sup> |             | 54.92    | 5523.00  | 0.00     | 0.00     |
| 747 | 180.49 | 583.24551  |        |                                                                                                                                                            |             | ION=[M+H+H] <sup>2+</sup> |             | 307.69   | 33759.17 | 0.00     | 0.00     |
| 748 | 182.57 | 421.29345  |        |                                                                                                                                                            |             | ION=[M+H+H] <sup>2+</sup> |             | 0.00     | 4888.50  | 0.00     | 0.00     |
| 749 | 185.65 | 596.14471  |        |                                                                                                                                                            |             | ION=[M+H+H] <sup>2+</sup> |             | 103.69   | 1885.33  | 1717.50  | 0.00     |
| 750 | 185.66 | 632.32877  |        |                                                                                                                                                            |             | ION=[M+H+H] <sup>2+</sup> |             | 0.00     | 507.83   | 0.00     | 0.00     |
| 751 | 188.52 | 411.09583  |        |                                                                                                                                                            |             | ION=[M+H+H] <sup>2+</sup> |             | 1523.23  | 1516.00  | 2033.00  | 572.67   |
| 753 | 190.63 | 359.2058   |        |                                                                                                                                                            |             | ION=[M+H] <sup>+</sup>    |             | 1722.46  | 266.50   | 375.17   | 1006.00  |
| 754 | 190.78 | 313.08451  |        |                                                                                                                                                            |             | ION=[M+H] <sup>+</sup>    |             | 6.31     | 2326.83  | 6674.00  | 0.00     |
| 755 | 192.55 | 235.10615  | 14.298 | 1-[(2-amino-9h-purin-6-yl)oxy]-3-methylbutan-2-one                                                                                                         | C10H13N5O2  | ION=[M+H] <sup>+</sup>    |             | 47.85    | 75.00    | 15.33    | 9326.33  |
| 756 | 192.73 | 264.14751  | 17.337 | Vorinostat                                                                                                                                                 | C14H20N2O3  | ION=[M+H] <sup>+</sup>    | 149647-78-9 | 9259.85  | 1431.17  | 2427.83  | 3666.33  |

|     |        |            |        |                                                                |            |                           |             |           |           |         |           |
|-----|--------|------------|--------|----------------------------------------------------------------|------------|---------------------------|-------------|-----------|-----------|---------|-----------|
| 757 | 192.79 | 310.11684  | 13.212 | 6-[2-(4-hydroxy-3-nitrophenyl)acetamido]hexanoic acid          | C14H18N2O6 | ION=[M+H] <sup>+</sup>    | 10463-23-7  | 1705.08   | 202.83    | 3358.83 | 540.33    |
| 758 | 193.15 | 504.19733  |        |                                                                |            | ION=[M+H] <sup>+</sup>    |             | 0.00      | 0.00      | 0.00    | 903.00    |
| 759 | 193.3  | 476.33242  | 1.942  | Cybastacine A                                                  | C26H44N4O4 | ION=[M+H+H] <sup>2+</sup> |             | 14973.23  | 127.00    | 0.00    | 0.00      |
| 760 | 193.56 | 468.1167   |        |                                                                |            | ION=[M+H+H] <sup>2+</sup> |             | 85.38     | 133.33    | 1742.17 | 0.00      |
| 761 | 194.28 | 1008.39412 |        |                                                                |            | ION=[M+H+H] <sup>2+</sup> |             | 0.00      | 0.00      | 22.17   | 3682.33   |
| 762 | 195.38 | 272.2093   |        |                                                                |            | ION=[M+H] <sup>+</sup>    |             | 477904.31 | 12.00     | 210.50  | 2412.67   |
| 763 | 198.66 | 460.03843  |        |                                                                |            | ION=[M+H+H] <sup>2+</sup> |             | 0.00      | 1416.33   | 0.00    | 0.00      |
| 764 | 199.41 | 230.01961  | 13.79  | L-xylulose 5-phosphate                                         | C5H11O8P   | ION=[M+H] <sup>+</sup>    | 108321-99-9 | 125.85    | 1426.67   | 796.50  | 0.00      |
| 765 | 199.47 | 151.04949  | 9.513  | Guanine                                                        | C5H5N5O    | ION=[M+H] <sup>+</sup>    |             | 109.54    | 3259.67   | 898.33  | 93.33     |
| 766 | 201.66 | 244.17891  |        |                                                                |            | ION=[M+H] <sup>+</sup>    |             | 12168.00  | 2842.17   | 2123.67 | 4939.33   |
| 767 | 203.38 | 206.17963  |        |                                                                |            | ION=[M+H] <sup>+</sup>    |             | 0.00      | 9.33      | 5.00    | 4935.67   |
| 768 | 204.78 | 488.35675  |        |                                                                |            | ION=[M+H+H] <sup>2+</sup> |             | 1528.92   | 304.00    | 616.50  | 0.00      |
| 769 | 209.32 | 238.14342  | 10.8   | Pirimicarb                                                     | C11H18N4O2 | ION=[M+H] <sup>+</sup>    | 23103-98-2  | 5882.92   | 4161.17   | 3230.33 | 14137.00  |
| 770 | 213.99 | 255.1685   |        |                                                                |            | ION=[M+H] <sup>+</sup>    |             | 1102.15   | 710.67    | 366.67  | 1121.00   |
| 771 | 215.21 | 205.10936  | 13.063 | 3-[(Dimethylamino)methyl]-2,3-dihydro-4H-chromen-4-one         | C12H15NO2  | ION=[M+H] <sup>+</sup>    |             | 2505.85   | 2139.83   | 921.00  | 1736.00   |
| 772 | 222.29 | 470.38058  |        |                                                                |            | ION=[M+H+H] <sup>2+</sup> |             | 0.00      | 4204.50   | 0.00    | 0.00      |
| 773 | 225.11 | 292.1786   | 2.395  | Carteolol                                                      | C16H24N2O3 | ION=[M+H] <sup>+</sup>    | 51781-06-7  | 100.46    | 8647.33   | 40.67   | 56.33     |
| 774 | 225.46 | 468.11605  |        |                                                                |            | ION=[M+H+H] <sup>2+</sup> |             | 1457.38   | 800.33    | 4998.17 | 1506.00   |
| 775 | 230.26 | 234.05975  |        |                                                                |            | ION=[M+H] <sup>+</sup>    |             | 139.54    | 258.67    | 1810.83 | 297.33    |
| 776 | 231.33 | 612.14235  |        |                                                                |            | ION=[M+H+H] <sup>2+</sup> |             | 205.23    | 1851.17   | 1592.17 | 217.67    |
| 777 | 234.52 | 343.24737  |        |                                                                |            | ION=[M+H] <sup>+</sup>    |             | 2723.08   | 446.67    | 0.00    | 0.00      |
| 778 | 234.52 | 252.08752  | 15.667 | Cndac                                                          | C10H12N4O4 | ION=[M+H] <sup>+</sup>    |             | 1025.69   | 2153.83   | 39.17   | 74.67     |
| 779 | 235.47 | 267.11103  | 18.407 | 6-amino-3-methyl-1-phenylpyrazolo[3,4-b]pyridine-5-carboxamide | C14H13N5O  | ION=[M+H] <sup>+</sup>    |             | 20.31     | 1830.17   | 0.00    | 0.00      |
| 780 | 235.83 | 816.42716  |        |                                                                |            | ION=[M+H+H] <sup>2+</sup> |             | 224.77    | 1113.50   | 138.50  | 157.00    |
| 781 | 240.3  | 330.17914  | 17.563 | L-n(omega)-nitroarginine-(4r)-amino-l-proline amide            | C11H22N8O4 | ION=[M+H] <sup>+</sup>    |             | 49.54     | 10732.33  | 10.33   | 30.33     |
| 782 | 241.73 | 252.12126  |        |                                                                |            | ION=[M+H] <sup>+</sup>    |             | 2009.54   | 797.17    | 350.83  | 2900.67   |
| 783 | 241.89 | 363.14297  | 12.173 | Kahakamide B                                                   | C17H21N3O6 | ION=[M+H] <sup>+</sup>    |             | 34.62     | 3651.67   | 20.00   | 0.00      |
| 784 | 242.23 | 446.3596   |        |                                                                |            | ION=[M+H+H] <sup>2+</sup> |             | 0.00      | 1833.33   | 0.00    | 0.00      |
| 785 | 244.52 | 488.35848  |        |                                                                |            | ION=[M+H+H] <sup>2+</sup> |             | 3437.38   | 1670.67   | 1409.83 | 6005.00   |
| 786 | 244.75 | 583.2459   | 15.074 | 3',4'-syn-prepyridomacrolidin B                                | C31H37NO10 | ION=[M+H+H] <sup>2+</sup> |             | 250.00    | 27965.17  | 0.00    | 0.00      |
| 787 | 245.17 | 556.24416  |        |                                                                |            | ION=[M+H+H] <sup>2+</sup> |             | 26.00     | 1066.50   | 300.17  | 0.00      |
| 788 | 245.55 | 1009.56903 |        |                                                                |            | ION=[M+H+H] <sup>2+</sup> |             | 397.69    | 1207.50   | 190.33  | 61.67     |
| 789 | 246.97 | 278.12264  | 14.288 | Oxadixyl                                                       | C14H18N2O4 | ION=[M+H] <sup>+</sup>    | 77732-09-3  | 0.00      | 4329.00   | 88.50   | 0.00      |
| 790 | 248.13 | 553.23458  |        |                                                                |            | ION=[M+H+H] <sup>2+</sup> |             | 499.69    | 2053.50   | 0.00    | 0.00      |
| 791 | 248.33 | 631.42987  |        |                                                                |            | ION=[M+H+H] <sup>2+</sup> |             | 5635.38   | 0.00      | 0.00    | 0.00      |
| 792 | 248.48 | 689.37265  |        |                                                                |            | ION=[M+H+H] <sup>2+</sup> |             | 13234.00  | 229.33    | 160.00  | 144.67    |
| 793 | 249.2  | 276.61754  |        |                                                                |            | ION=[M+H] <sup>+</sup>    |             | 28.92     | 490.17    | 0.00    | 0.00      |
| 794 | 250.86 | 713.40208  | 34.883 | Microginin 713                                                 | C37H55N5O9 | ION=[M+H+H] <sup>2+</sup> |             | 2532.00   | 1468.33   | 5953.33 | 2294.67   |
| 795 | 251.17 | 603.26432  |        |                                                                |            | ION=[M+H+H] <sup>2+</sup> |             | 0.00      | 16.83     | 23.67   | 10763.33  |
| 796 | 251.24 | 1266.7011  |        |                                                                |            | ION=[M+H+H] <sup>2+</sup> |             | 2001.08   | 109.33    | 278.67  | 0.00      |
| 797 | 252.48 | 1593.72881 |        |                                                                |            | ION=[M+H+H] <sup>2+</sup> |             | 1821.69   | 0.00      | 55.50   | 119.33    |
| 798 | 252.98 | 586.24046  | 47.075 | Tolyporphin F                                                  | C32H34N4O7 | ION=[M+H+H] <sup>2+</sup> |             | 0.00      | 99.33     | 0.00    | 4001.33   |
| 799 | 253.22 | 1906.81529 |        |                                                                |            | ION=[M+H+H] <sup>2+</sup> |             | 442.62    | 25.00     | 3962.33 | 165.33    |
| 800 | 253.77 | 1447.78849 |        |                                                                |            | ION=[M+H+H] <sup>2+</sup> |             | 319.23    | 134.00    | 2965.83 | 2115.00   |
| 801 | 254.28 | 357.26248  |        |                                                                |            | ION=[M+H] <sup>+</sup>    |             | 29287.38  | 0.00      | 0.00    | 45.00     |
| 802 | 254.57 | 514.2591   |        |                                                                |            | ION=[M+H] <sup>+</sup>    |             | 25.38     | 574.83    | 0.00    | 0.00      |
| 803 | 254.74 | 600.35709  |        |                                                                |            | ION=[M+H+H] <sup>2+</sup> |             | 1810.62   | 180.83    | 718.17  | 1006.67   |
| 804 | 254.91 | 675.35678  |        |                                                                |            | ION=[M+H+H] <sup>2+</sup> |             | 4180.15   | 1046.33   | 3426.67 | 3412.00   |
| 805 | 255.22 | 251.10243  | 9.542  | 2-(2-Hydroxy-Phenyl)-1h-Indole-5-Carboxamide                   | C15H13N3O  | ION=[M+H] <sup>+</sup>    | 179748-10-8 | 9.69      | 0.00      | 0.00    | 2901.33   |
| 806 | 256.03 | 272.20957  |        |                                                                |            | ION=[M+H] <sup>+</sup>    |             | 1481.54   | 274937.67 | 15.00   | 0.00      |
| 807 | 256.13 | 1499.79024 |        |                                                                |            | ION=[M+H+H] <sup>2+</sup> |             | 4351.85   | 326.50    | 86.00   | 38.67     |
| 808 | 256.21 | 404.35075  |        |                                                                |            | ION=[M+H+H] <sup>2+</sup> |             | 0.00      | 2285.17   | 0.00    | 0.00      |
| 809 | 256.93 | 1028.51877 |        |                                                                |            | ION=[M+H+H] <sup>2+</sup> |             | 277.38    | 1162.33   | 158.50  | 23.00     |
| 810 | 257.19 | 1048.57971 |        |                                                                |            | ION=[M+H+H] <sup>2+</sup> |             | 1179.69   | 2234.50   | 3384.50 | 232.33    |
| 811 | 257.45 | 1272.63914 |        |                                                                |            | ION=[M+H+H] <sup>2+</sup> |             | 459.08    | 397.00    | 2614.83 | 606.00    |
| 812 | 257.74 | 490.34952  | 7.505  | PEG Diethylhexanoate n5                                        | C26H50O8   | ION=[M+H+H] <sup>2+</sup> |             | 123.38    | 10767.17  | 80.67   | 42.67     |
| 813 | 258.01 | 641.40599  |        |                                                                |            | ION=[M+H+H] <sup>2+</sup> |             | 1736.15   | 1604.17   | 4249.33 | 2365.00   |
| 814 | 258.75 | 1244.65101 |        |                                                                |            | ION=[M+H+H] <sup>2+</sup> |             | 1619.69   | 1503.33   | 779.00  | 71.67     |
| 815 | 259.97 | 157.95403  |        |                                                                |            | ION=[M+H] <sup>+</sup>    |             | 6195.38   | 10319.00  | 7134.50 | 5660.00   |
| 816 | 260.51 | 294.15765  | 11.932 | Cyclocarbamide B                                               | C15H22N2O4 | ION=[M+H] <sup>+</sup>    |             | 11509.23  | 831.00    | 2782.50 | 4203.33   |
| 817 | 260.9  | 470.29322  |        |                                                                |            | ION=[M+H+H] <sup>2+</sup> |             | 0.00      | 0.00      | 0.00    | 103958.00 |
| 818 | 261.21 | 1038.49306 |        |                                                                |            | ION=[M+H+H] <sup>2+</sup> |             | 110.92    | 173.83    | 2994.17 | 552.00    |
| 819 | 261.83 | 1229.68769 |        |                                                                |            | ION=[M+H+H] <sup>2+</sup> |             | 1927.38   | 69.33     | 64.33   | 0.00      |
| 820 | 261.83 | 1188.65628 |        |                                                                |            | ION=[M+H+H] <sup>2+</sup> |             | 9139.69   | 131.00    | 247.33  | 202.33    |
| 821 | 262.18 | 278.16318  | 14.542 | Santacruzamate A                                               | C15H22N2O3 | ION=[M+H] <sup>+</sup>    |             | 5712.92   | 168.00    | 1470.83 | 0.00      |
| 822 | 262.2  | 647.42546  |        |                                                                |            | ION=[M+H+H] <sup>2+</sup> |             | 2370.15   | 0.00      | 0.00    | 0.00      |
| 823 | 263.07 | 712.87769  |        |                                                                |            | ION=[M+H+H] <sup>2+</sup> |             | 1489.23   | 1368.67   | 628.33  | 0.00      |
| 824 | 263.21 | 588.30873  |        |                                                                |            | ION=[M+H+H] <sup>2+</sup> |             | 0.00      | 248.33    | 60.17   | 3504.00   |
| 825 | 264.03 | 1552.73286 |        |                                                                |            | ION=[M+H+H] <sup>2+</sup> |             | 2698.92   | 9.50      | 0.00    | 170.00    |
| 826 | 264.05 | 292.13589  |        |                                                                |            | ION=[M+H] <sup>+</sup>    |             | 0.00      | 2348.17   | 64.17   | 0.00      |



|     |        |            |        |                                                                                        |              |                            |           |          |          |           |           |
|-----|--------|------------|--------|----------------------------------------------------------------------------------------|--------------|----------------------------|-----------|----------|----------|-----------|-----------|
| 827 | 264.29 | 239.18922  |        |                                                                                        |              | ION=[M+H] <sup>+</sup>     |           | 3939.38  | 607.33   | 1757.33   | 2493.33   |
| 828 | 264.95 | 158.08476  | 5.863  | Benzylimidazole                                                                        | C10H10N2     | ION=[M+H] <sup>+</sup>     | 4238-71-5 | 2476.31  | 1149.83  | 517.33    | 993.67    |
| 829 | 264.99 | 335.18544  | 19.983 | JWH-250                                                                                | C22H25NO2    | ION=[M+H] <sup>+</sup>     |           | 4007.08  | 318.67   | 1363.17   | 1506.33   |
| 830 | 266.3  | 198.98389  |        |                                                                                        |              | ION=[M+H] <sup>+</sup>     |           | 4018.92  | 4207.17  | 3553.33   | 2668.67   |
| 831 | 266.72 | 890.45414  |        |                                                                                        |              | ION=[M+H+H] <sup>2+</sup>  |           | 14851.85 | 1776.83  | 801.17    | 371.00    |
| 832 | 266.83 | 669.32399  |        |                                                                                        |              | ION=[M+H] <sup>+</sup>     |           | 50.15    | 4055.83  | 61.67     | 2409.00   |
| 833 | 267.46 | 346.13706  | 38.509 | Porphyrin-334                                                                          | C14H22N2O8   | ION=[M+H] <sup>+</sup>     |           | 70.77    | 2438.50  | 114.50    | 368.00    |
| 834 | 268.51 | 413.19794  |        |                                                                                        |              | ION=[M+H+H] <sup>2+</sup>  |           | 2931.69  | 322.50   | 3163.50   | 1902.00   |
| 835 | 268.56 | 454.30043  |        |                                                                                        |              | ION=[M+H+H] <sup>2+</sup>  |           | 0.00     | 16.67    | 13.67     | 4284.33   |
| 836 | 268.88 | 1214.62966 | 15.469 | Nostoweipeptin W1                                                                      | C61H86N10O16 | ION=[M+H+H2] <sup>3+</sup> |           | 240.46   | 3293.00  | 431.67    | 259.00    |
| 837 | 269.02 | 759.42007  |        |                                                                                        |              | ION=[M+H+H] <sup>2+</sup>  |           | 234.46   | 1509.50  | 363.17    | 345.33    |
| 838 | 269.75 | 818.41563  |        |                                                                                        |              | ION=[M+H+H] <sup>2+</sup>  |           | 4135.23  | 5099.83  | 1170.33   | 784.33    |
| 839 | 269.89 | 392.21622  |        |                                                                                        |              | ION=[M+H] <sup>+</sup>     |           | 504.31   | 205.67   | 59.50     | 0.00      |
| 840 | 270.11 | 1718.94294 |        |                                                                                        |              | ION=[M+H+H2] <sup>3+</sup> |           | 106.62   | 378.50   | 3348.33   | 1632.67   |
| 841 | 270.3  | 1327.70214 |        |                                                                                        |              | ION=[M+H+H2] <sup>3+</sup> |           | 440.62   | 1529.00  | 276.00    | 71.00     |
| 842 | 270.38 | 379.71074  |        |                                                                                        |              | ION=[M+H] <sup>+</sup>     |           | 0.00     | 481.50   | 32.83     | 108.00    |
| 843 | 270.62 | 1199.58452 |        |                                                                                        |              | ION=[M+H+H2] <sup>3+</sup> |           | 441.08   | 788.17   | 3089.33   | 115.67    |
| 844 | 271.03 | 286.22613  |        |                                                                                        |              | ION=[M+H] <sup>+</sup>     |           | 0.00     | 3789.17  | 0.00      | 0.00      |
| 845 | 271.27 | 784.43147  |        |                                                                                        |              | ION=[M+H+H] <sup>2+</sup>  |           | 1522.46  | 1783.67  | 1544.33   | 2757.00   |
| 846 | 271.39 | 1965.74744 |        |                                                                                        |              | ION=[M+H+H] <sup>2+</sup>  |           | 0.00     | 0.00     | 2948.67   | 0.00      |
| 847 | 271.43 | 427.2242   |        |                                                                                        |              | ION=[M+H] <sup>+</sup>     |           | 255.69   | 2072.17  | 369.67    | 301.33    |
| 848 | 271.47 | 486.26999  |        |                                                                                        |              | ION=[M+H+H] <sup>2+</sup>  |           | 0.00     | 12.50    | 0.00      | 9427.33   |
| 849 | 271.73 | 1116.56911 |        |                                                                                        |              | ION=[M+H+H] <sup>2+</sup>  |           | 1621.85  | 401.17   | 421.33    | 667.67    |
| 850 | 271.84 | 853.95021  |        |                                                                                        |              | ION=[M+H+H] <sup>2+</sup>  |           | 16.15    | 2127.83  | 153.50    | 0.00      |
| 851 | 271.91 | 1275.67588 |        |                                                                                        |              | ION=[M+H+H] <sup>2+</sup>  |           | 1170.62  | 764.17   | 0.00      | 0.00      |
| 852 | 271.99 | 982.8742   |        |                                                                                        |              | ION=[M+H] <sup>+</sup>     |           | 0.00     | 0.00     | 456.83    | 0.00      |
| 853 | 272.06 | 351.18096  |        |                                                                                        |              | ION=[M+H] <sup>+</sup>     |           | 2265.54  | 201.83   | 723.50    | 1148.00   |
| 854 | 272.32 | 282.16796  | 5.404  | PEG n6                                                                                 | C12H26O7     | ION=[M+H] <sup>+</sup>     |           | 5910.46  | 2765.33  | 2030.67   | 11064.00  |
| 855 | 272.38 | 299.19445  |        |                                                                                        |              | ION=[M+H] <sup>+</sup>     |           | 6151.38  | 1800.17  | 1258.17   | 8292.00   |
| 856 | 272.88 | 677.30873  |        |                                                                                        |              | ION=[M+H] <sup>+</sup>     |           | 1837.08  | 118.00   | 23.67     | 140.00    |
| 857 | 273.05 | 1029.53869 |        |                                                                                        |              | ION=[M+H+H] <sup>2+</sup>  |           | 1445.08  | 185.17   | 152.33    | 18.00     |
| 858 | 273.16 | 459.18721  |        |                                                                                        |              | ION=[M+H] <sup>+</sup>     |           | 3757.85  | 0.00     | 142.17    | 1902.00   |
| 859 | 273.7  | 1289.60121 |        |                                                                                        |              | ION=[M+H+H2] <sup>3+</sup> |           | 1562.15  | 0.00     | 822.00    | 769.67    |
| 860 | 274.68 | 680.22564  |        |                                                                                        |              | ION=[M+H+H] <sup>2+</sup>  |           | 144.77   | 3020.33  | 39.50     | 58.00     |
| 861 | 275.38 | 326.13473  | 17.798 | 4-{6-[(1-hydroxybutan-2-yl)amino]imidazo[1,2-b]pyridazin-3-yl}benzoic acid             | C17H18N4O3   | ION=[M+H] <sup>+</sup>     |           | 1453.23  | 1315.33  | 2999.33   | 696.33    |
| 862 | 276.27 | 1122.6481  |        |                                                                                        |              | ION=[M+H+H2] <sup>3+</sup> |           | 2306.62  | 816.83   | 274.83    | 630.67    |
| 863 | 276.55 | 1002.49315 |        |                                                                                        |              | ION=[M+H+H] <sup>2+</sup>  |           | 12966.31 | 2172.50  | 1797.00   | 1264.00   |
| 864 | 276.8  | 1256.68996 |        |                                                                                        |              | ION=[M+H+H2] <sup>3+</sup> |           | 65.23    | 8046.83  | 190.50    | 370.67    |
| 865 | 277.16 | 520.35872  |        |                                                                                        |              | ION=[M+H+H] <sup>2+</sup>  |           | 0.00     | 5127.83  | 0.00      | 0.00      |
| 866 | 277.24 | 889.45137  |        |                                                                                        |              | ION=[M+H+H] <sup>2+</sup>  |           | 5649.69  | 9336.33  | 880.33    | 441.00    |
| 867 | 278.06 | 3811.43346 |        |                                                                                        |              | ION=[M+H+H2] <sup>3+</sup> |           | 9.85     | 1584.50  | 0.00      | 0.00      |
| 868 | 278.95 | 201.04766  | 8.201  | Diphenylphosphine oxide                                                                | C12H10OP     | ION=[M+H] <sup>+</sup>     |           | 2229.69  | 2440.67  | 1072.50   | 6223.00   |
| 869 | 279.1  | 980.373    |        |                                                                                        |              | ION=[M+H+H] <sup>2+</sup>  |           | 0.00     | 0.00     | 1008.17   | 8253.00   |
| 870 | 279.56 | 927.46054  |        |                                                                                        |              | ION=[M+H+H] <sup>2+</sup>  |           | 14.92    | 1371.50  | 14348.67  | 10853.33  |
| 871 | 279.59 | 927.47234  |        |                                                                                        |              | ION=[M+H] <sup>+</sup>     |           | 10.92    | 332.00   | 5165.17   | 39268.33  |
| 872 | 279.63 | 812.39829  |        |                                                                                        |              | ION=[M+H+H] <sup>2+</sup>  |           | 129.08   | 514.83   | 4479.67   | 36608.67  |
| 873 | 279.72 | 767.48648  |        |                                                                                        |              | ION=[M+H+H] <sup>2+</sup>  |           | 0.00     | 1452.50  | 235.00    | 175.00    |
| 874 | 280.07 | 1294.64459 |        |                                                                                        |              | ION=[M+H+H2] <sup>3+</sup> |           | 1694.62  | 217.17   | 2007.33   | 908.33    |
| 875 | 280.47 | 965.40327  |        |                                                                                        |              | ION=[M+H+H2] <sup>3+</sup> |           | 0.00     | 260.67   | 2625.67   | 1605.67   |
| 876 | 280.7  | 676.38568  |        |                                                                                        |              | ION=[M+H+H] <sup>2+</sup>  |           | 1489.23  | 385.50   | 132.67    | 48.67     |
| 877 | 280.8  | 714.40237  |        |                                                                                        |              | ION=[M+H+H] <sup>2+</sup>  |           | 158.00   | 0.00     | 339.00    | 866.00    |
| 878 | 281.91 | 1114.55122 |        |                                                                                        |              | ION=[M+H+H] <sup>2+</sup>  |           | 1213.69  | 0.00     | 0.00      | 0.00      |
| 879 | 281.94 | 557.27386  |        |                                                                                        |              | ION=[M+H] <sup>+</sup>     |           | 2169.08  | 768.00   | 772.17    | 2144.67   |
| 880 | 283.02 | 383.18008  |        |                                                                                        |              | ION=[M+H] <sup>+</sup>     |           | 4126.31  | 2088.17  | 2274.00   | 4718.67   |
| 881 | 283.14 | 1550.71878 |        |                                                                                        |              | ION=[M+H+H2] <sup>3+</sup> |           | 213.85   | 458.50   | 2330.83   | 21.00     |
| 882 | 283.24 | 190.08539  | 8.433  | Diethyleneglycol diacetate                                                             | C8H14O5      | ION=[M+H] <sup>+</sup>     |           | 3012.15  | 1873.67  | 1680.50   | 3754.33   |
| 883 | 284.16 | 398.13226  |        |                                                                                        |              | ION=[M+H] <sup>+</sup>     |           | 2341.69  | 27.17    | 0.00      | 0.00      |
| 884 | 284.64 | 1187.60902 |        |                                                                                        |              | ION=[M+H+H] <sup>2+</sup>  |           | 3328.15  | 337.33   | 207.00    | 25.33     |
| 885 | 285.18 | 975.47807  |        |                                                                                        |              | ION=[M+H+H] <sup>2+</sup>  |           | 2040.31  | 710.67   | 77.50     | 40.00     |
| 886 | 285.18 | 701.39077  |        |                                                                                        |              | ION=[M+H+H] <sup>2+</sup>  |           | 3206.92  | 1058.17  | 290.00    | 3421.00   |
| 887 | 285.94 | 322.18816  | 12.991 | N-ethyl-3-fluoro-3-[3-fluoro-4-(pyrrolidin-1-ylmethyl)phenyl]cyclobutane-1-carboxamide | C18H24F2N2O  | ION=[M+H] <sup>+</sup>     |           | 253.85   | 2419.00  | 39.17     | 0.00      |
| 888 | 286.11 | 345.19069  |        |                                                                                        |              | ION=[M+H] <sup>+</sup>     |           | 2110.15  | 1301.17  | 1013.33   | 2323.33   |
| 889 | 286.99 | 165.07959  | 6.912  | D-Phenylalanine                                                                        | C9H11NO2     | ION=[M+H] <sup>+</sup>     |           | 2081.38  | 2691.83  | 4214.00   | 6235.67   |
| 890 | 287.07 | 252.65019  |        |                                                                                        |              | ION=[M+H] <sup>+</sup>     |           | 431.38   | 113.17   | 0.00      | 0.00      |
| 891 | 287.6  | 746.39239  |        |                                                                                        |              | ION=[M+H+H] <sup>2+</sup>  |           | 2234.00  | 694.17   | 6411.17   | 2713.00   |
| 892 | 287.68 | 313.1744   |        |                                                                                        |              | ION=[M+H] <sup>+</sup>     |           | 2467.54  | 586.67   | 327.67    | 3006.67   |
| 893 | 287.79 | 828.37201  |        |                                                                                        |              | ION=[M+H+H] <sup>2+</sup>  |           | 887.08   | 77.33    | 0.00      | 0.00      |
| 894 | 287.94 | 505.30196  | 17.92  | Borrelidin C                                                                           | C28H43NO7    | ION=[M+H+H] <sup>2+</sup>  |           | 1291.08  | 1637.17  | 1111.17   | 682.67    |
| 895 | 288.16 | 296.14603  | 14.772 | Caryophyllose                                                                          | C12H24O8     | ION=[M+H] <sup>+</sup>     |           | 1425.69  | 411.00   | 220.00    | 2666.33   |
| 896 | 288.5  | 881.47987  |        |                                                                                        |              | ION=[M+H+H] <sup>2+</sup>  |           | 546.62   | 3171.50  | 710.67    | 651.33    |
| 897 | 288.57 | 294.12162  | 3.758  | Aspartame                                                                              | C14H18N2O5   | ION=[M+H] <sup>+</sup>     |           | 59969.85 | 69789.33 | 133169.00 | 160222.33 |
| 898 | 288.82 | 414.18695  | NA     | Ptesculentoside                                                                        | C20H30O9     | ION=[M+H] <sup>+</sup>     |           | 623.38   | 407.00   | 0.00      | 0.00      |

|     |        |            |        |                                                                                                         |             |                |          |          |         |          |
|-----|--------|------------|--------|---------------------------------------------------------------------------------------------------------|-------------|----------------|----------|----------|---------|----------|
| 899 | 288.93 | 1386.69864 |        |                                                                                                         |             | ION=[M+H+H2]3+ | 641.54   | 4796.17  | 398.83  | 570.67   |
| 900 | 289    | 579.52049  |        |                                                                                                         |             | ION=[M+H]+     | 0.00     | 26.83    | 1641.83 | 46.00    |
| 901 | 289.26 | 896.52843  |        |                                                                                                         |             | ION=[M+H+H]2+  | 0.00     | 1369.17  | 0.00    | 0.00     |
| 902 | 289.34 | 579.71916  |        |                                                                                                         |             | ION=[M+H]+     | 8.77     | 0.00     | 1460.00 | 0.00     |
| 903 | 289.44 | 303.1593   |        |                                                                                                         |             | ION=[M+H]+     | 2549.85  | 446.00   | 333.83  | 1757.33  |
| 904 | 290.05 | 900.51698  |        |                                                                                                         |             | ION=[M+H+H]2+  | 1301.38  | 214.33   | 261.17  | 171.33   |
| 905 | 290.09 | 1216.64329 |        |                                                                                                         |             | ION=[M+H+H2]3+ | 264.77   | 14.83    | 3082.00 | 131.00   |
| 906 | 290.81 | 1500.74706 |        |                                                                                                         |             | ION=[M+H+H2]3+ | 198.46   | 2353.33  | 262.50  | 201.67   |
| 907 | 290.89 | 1147.56102 |        |                                                                                                         |             | ION=[M+H+H]2+  | 2380.62  | 368.00   | 118.33  | 0.00     |
| 908 | 290.99 | 518.27837  |        |                                                                                                         |             | ION=[M+H]+     | 2151.08  | 135.67   | 58.83   | 162.67   |
| 909 | 291.69 | 393.19401  | NA     | 2-[[8-(3-aminopiperidin-1-yl)-1,3-dimethyl-2,6-dioxo-2,3,6,7-tetrahydro-1h-purin-7-yl]methyl]benzotrile | C20H23N7O2  | ION=[M+H]+     | 2020.00  | 659.00   | 655.00  | 2057.00  |
| 910 | 291.78 | 943.56359  |        |                                                                                                         |             | ION=[M+H+H]2+  | 11096.92 | 577.67   | 172.67  | 0.00     |
| 911 | 292.79 | 1211.65828 |        |                                                                                                         |             | ION=[M+H+H2]3+ | 37.69    | 544.33   | 2091.83 | 0.00     |
| 912 | 292.8  | 240.13669  | 21.121 | 12?-Deoxy-decarbamoysaxitoxin                                                                           | C9H16N6O2   | ION=[M+H]+     | 2919.38  | 3674.67  | 512.83  | 1066.33  |
| 913 | 292.83 | 1167.6812  |        |                                                                                                         |             | ION=[M+H+H2]3+ | 1522.00  | 1541.33  | 3093.50 | 214.33   |
| 914 | 292.85 | 1272.70069 |        |                                                                                                         |             | ION=[M+H+H2]3+ | 3710.00  | 55.33    | 200.17  | 317.33   |
| 915 | 292.96 | 899.41227  |        |                                                                                                         |             | ION=[M+H+H]2+  | 99.23    | 1357.67  | 19.00   | 0.00     |
| 916 | 293.33 | 826.42471  |        |                                                                                                         |             | ION=[M+H]+     | 0.00     | 31.67    | 615.83  | 5991.67  |
| 917 | 293.34 | 941.47543  |        |                                                                                                         |             | ION=[M+H+H]2+  | 0.00     | 947.83   | 7454.17 | 46827.33 |
| 918 | 293.39 | 941.48829  |        |                                                                                                         |             | ION=[M+H]+     | 0.00     | 22.00    | 2301.33 | 13525.33 |
| 919 | 293.39 | 826.41182  |        |                                                                                                         |             | ION=[M+H+H]2+  | 74.92    | 291.67   | 2346.00 | 15678.00 |
| 920 | 294.51 | 1308.74777 |        |                                                                                                         |             | ION=[M+H+H2]3+ | 215.23   | 1751.00  | 2807.00 | 1067.67  |
| 921 | 294.81 | 279.00683  |        |                                                                                                         |             | ION=[M+H]+     | 0.00     | 10426.83 | 0.00    | 0.00     |
| 922 | 294.84 | 794.90836  |        |                                                                                                         |             | ION=[M+H+H]2+  | 534.62   | 1565.00  | 413.33  | 16.33    |
| 923 | 294.97 | 701.36153  |        |                                                                                                         |             | ION=[M+H]+     | 2330.15  | 104.83   | 546.33  | 5903.33  |
| 924 | 294.99 | 1251.69191 |        |                                                                                                         |             | ION=[M+H+H2]3+ | 2924.00  | 1809.17  | 582.83  | 784.33   |
| 925 | 295.22 | 361.05971  |        |                                                                                                         |             | ION=[M+H]+     | 635.08   | 2448.00  | 553.17  | 239.33   |
| 926 | 295.25 | 920.48959  |        |                                                                                                         |             | ION=[M+H+H]2+  | 1863.38  | 1503.00  | 1215.17 | 760.67   |
| 927 | 295.31 | 794.41143  |        |                                                                                                         |             | ION=[M+H+H]2+  | 957.38   | 2080.83  | 742.50  | 488.00   |
| 928 | 295.38 | 817.42608  |        |                                                                                                         |             | ION=[M+H+H]2+  | 1611.54  | 137.83   | 1779.00 | 762.00   |
| 929 | 295.54 | 264.15638  |        |                                                                                                         |             | ION=[M+H+H]2+  | 410.92   | 0.00     | 0.00    | 0.00     |
| 930 | 295.7  | 1762.87274 |        |                                                                                                         |             | ION=[M+H+H2]3+ | 2174.00  | 0.00     | 14.50   | 11.33    |
| 931 | 296.23 | 632.36022  | 7.556  | Pseudoxyllallemycin D                                                                                   | C36H48N4O6  | ION=[M+H+H]2+  | 844.15   | 2216.83  | 399.67  | 2597.00  |
| 932 | 296.62 | 1244.65356 |        |                                                                                                         |             | ION=[M+H+H2]3+ | 647.38   | 297.00   | 1868.17 | 497.67   |
| 933 | 296.99 | 1272.65563 |        |                                                                                                         |             | ION=[M+H+H2]3+ | 599.08   | 3402.83  | 619.50  | 528.33   |
| 934 | 297.12 | 1586.57294 |        |                                                                                                         |             | ION=[M+H+H]2+  | 24.15    | 2244.17  | 11.33   | 0.00     |
| 935 | 297.35 | 870.95732  |        |                                                                                                         |             | ION=[M+H+H]2+  | 77.08    | 1839.33  | 123.00  | 45.00    |
| 936 | 297.58 | 955.56176  |        |                                                                                                         |             | ION=[M+H+H]2+  | 296.92   | 2701.00  | 492.17  | 121.67   |
| 937 | 297.59 | 1849.90558 |        |                                                                                                         |             | ION=[M+H+H2]3+ | 1426.92  | 0.00     | 0.00    | 29.33    |
| 938 | 297.71 | 871.46284  |        |                                                                                                         |             | ION=[M+H+H]2+  | 460.00   | 1329.17  | 315.67  | 337.00   |
| 939 | 297.84 | 1002.40108 |        |                                                                                                         |             | ION=[M+H]+     | 5.08     | 11.67    | 0.00    | 2821.67  |
| 940 | 297.97 | 325.27284  |        |                                                                                                         |             | ION=[M+H]+     | 16627.08 | 19.33    | 6.17    | 67.67    |
| 941 | 298.06 | 435.7295   |        |                                                                                                         |             | ION=[M+H]+     | 36.46    | 420.67   | 87.83   | 0.00     |
| 942 | 298.59 | 2004.80138 |        |                                                                                                         |             | ION=[M+H+H]2+  | 0.00     | 9.33     | 0.00    | 815.00   |
| 943 | 298.62 | 901.42352  |        |                                                                                                         |             | ION=[M+H]+     | 0.00     | 2238.17  | 23.17   | 0.00     |
| 944 | 299.09 | 1912.97222 |        |                                                                                                         |             | ION=[M+H+H2]3+ | 121.85   | 372.50   | 1739.00 | 33.33    |
| 945 | 299.56 | 1856.92486 |        |                                                                                                         |             | ION=[M+H+H2]3+ | 1872.15  | 99.50    | 15.67   | 0.00     |
| 946 | 299.86 | 1489.71653 |        |                                                                                                         |             | ION=[M+H+H2]3+ | 8260.92  | 396.33   | 618.00  | 968.67   |
| 947 | 299.88 | 329.23153  |        |                                                                                                         |             | ION=[M+H]+     | 4829.08  | 1552.83  | 1702.17 | 6202.33  |
| 948 | 300.2  | 525.45659  |        |                                                                                                         |             | ION=[M+H+H]2+  | 2453.85  | 0.00     | 0.00    | 0.00     |
| 949 | 300.67 | 1784.98109 |        |                                                                                                         |             | ION=[M+H+H2]3+ | 811.38   | 1843.50  | 404.50  | 0.00     |
| 950 | 301.07 | 378.72534  |        |                                                                                                         |             | ION=[M+H]+     | 416.00   | 1486.17  | 388.67  | 233.00   |
| 951 | 301.16 | 1264.60152 |        |                                                                                                         |             | ION=[M+H+H]2+  | 3425.38  | 42.17    | 253.00  | 534.00   |
| 952 | 301.18 | 2052.00162 |        |                                                                                                         |             | ION=[M+H+H2]3+ | 1590.00  | 44.00    | 71.33   | 0.00     |
| 953 | 301.6  | 343.2205   |        |                                                                                                         |             | ION=[M+H]+     | 5633.23  | 2109.00  | 1020.00 | 6765.00  |
| 954 | 301.71 | 756.91525  |        |                                                                                                         |             | ION=[M+H+H]2+  | 51.85    | 2080.83  | 196.00  | 10.33    |
| 955 | 302.03 | 326.19498  |        |                                                                                                         |             | ION=[M+H]+     | 2057.38  | 1095.00  | 638.00  | 3455.33  |
| 956 | 302.13 | 1042.51902 |        |                                                                                                         |             | ION=[M+H+H]2+  | 1221.69  | 362.33   | 268.17  | 557.67   |
| 957 | 302.27 | 378.71036  |        |                                                                                                         |             | ION=[M+H]+     | 118.46   | 1379.83  | 306.83  | 96.00    |
| 958 | 302.79 | 1056.60902 | 15.965 | Thalassospiramide J                                                                                     | C53H84N8O14 | ION=[M+H+H]2+  | 171.38   | 4467.67  | 47.67   | 192.00   |
| 959 | 302.9  | 1089.56677 |        |                                                                                                         |             | ION=[M+H+H]2+  | 2299.23  | 1372.83  | 704.50  | 455.67   |
| 960 | 303.69 | 515.29253  |        |                                                                                                         |             | ION=[M+H]+     | 2934.92  | 244.67   | 141.00  | 748.67   |
| 961 | 303.94 | 422.2161   |        |                                                                                                         |             | ION=[M+H]+     | 1882.15  | 2580.17  | 2627.50 | 971.67   |
| 962 | 304.15 | 812.45706  |        |                                                                                                         |             | ION=[M+H+H]2+  | 2852.31  | 397.17   | 437.83  | 4298.00  |
| 963 | 304.85 | 1359.69592 |        |                                                                                                         |             | ION=[M+H+H]2+  | 2111.69  | 108.67   | 240.00  | 34.33    |
| 964 | 304.85 | 1878.03167 |        |                                                                                                         |             | ION=[M+H+H2]3+ | 3336.92  | 0.00     | 536.67  | 108.00   |
| 965 | 304.88 | 601.19204  |        |                                                                                                         |             | ION=[M+H]+     | 2213.23  | 138.17   | 417.67  | 234.67   |
| 966 | 304.96 | 286.22564  |        |                                                                                                         |             | ION=[M+H]+     | 138.00   | 16627.17 | 0.00    | 0.00     |
| 967 | 305.11 | 1444.75255 |        |                                                                                                         |             | ION=[M+H+H2]3+ | 1444.31  | 90.83    | 58.00   | 18.33    |
| 968 | 305.28 | 960.02518  |        |                                                                                                         |             | ION=[M+H+H]2+  | 2135.08  | 18.00    | 399.33  | 44.00    |
| 969 | 305.39 | 959.52298  |        |                                                                                                         |             | ION=[M+H+H]2+  | 2356.00  | 254.33   | 361.67  | 304.33   |
| 970 | 305.4  | 939.01045  |        |                                                                                                         |             | ION=[M+H+H]2+  | 18873.85 | 309.50   | 2534.67 | 861.00   |

|      |        |            |        |                                                                          |              |  |                            |             |           |          |         |          |
|------|--------|------------|--------|--------------------------------------------------------------------------|--------------|--|----------------------------|-------------|-----------|----------|---------|----------|
| 971  | 305.58 | 391.24605  |        |                                                                          |              |  | ION=[M+H] <sup>+</sup>     |             | 666.15    | 5581.33  | 0.00    | 0.00     |
| 972  | 305.78 | 373.21907  |        |                                                                          |              |  | ION=[M+H] <sup>+</sup>     |             | 2973.08   | 1050.67  | 1377.33 | 2511.33  |
| 973  | 306.04 | 947.50033  |        |                                                                          |              |  | ION=[M+H+H] <sup>2+</sup>  |             | 1445.08   | 1330.50  | 434.83  | 919.00   |
| 974  | 306.86 | 1245.63014 |        |                                                                          |              |  | ION=[M+H+H] <sup>2+</sup>  |             | 204.15    | 2528.50  | 364.50  | 792.33   |
| 975  | 307.08 | 583.4626   |        |                                                                          |              |  | ION=[M+H+H] <sup>2+</sup>  |             | 2841.69   | 0.00     | 0.00    | 0.00     |
| 976  | 307.28 | 928.54956  |        |                                                                          |              |  | ION=[M+H+H] <sup>2+</sup>  |             | 280.77    | 2503.50  | 877.00  | 105.33   |
| 977  | 307.73 | 785.9398   |        |                                                                          |              |  | ION=[M+H+H] <sup>2+</sup>  |             | 371.08    | 4263.83  | 237.17  | 172.00   |
| 978  | 307.89 | 412.13469  |        |                                                                          |              |  | ION=[M+H] <sup>+</sup>     |             | 2610.62   | 764.00   | 1211.00 | 575.00   |
| 979  | 308.13 | 320.21029  | 9.786  | lprovalicarb                                                             | C18H28N2O3   |  | ION=[M+H] <sup>+</sup>     | 140923-17-7 | 0.00      | 5705.83  | 11.83   | 0.00     |
| 980  | 308.35 | 1556.83769 |        |                                                                          |              |  | ION=[M+H+H2] <sup>3+</sup> |             | 1802.31   | 3600.00  | 594.50  | 0.00     |
| 981  | 308.64 | 1473.73808 |        |                                                                          |              |  | ION=[M+H+H2] <sup>3+</sup> |             | 889.23    | 2058.50  | 343.83  | 474.67   |
| 982  | 308.66 | 313.27308  |        |                                                                          |              |  | ION=[M+H] <sup>+</sup>     |             | 0.00      | 2131.00  | 9.67    | 12.67    |
| 983  | 309.1  | 1233.6578  |        |                                                                          |              |  | ION=[M+H+H2] <sup>3+</sup> |             | 599.23    | 180.17   | 2630.50 | 344.33   |
| 984  | 309.5  | 1330.71205 |        |                                                                          |              |  | ION=[M+H+H2] <sup>3+</sup> |             | 361.38    | 3638.33  | 339.83  | 527.33   |
| 985  | 310.15 | 998.56917  |        |                                                                          |              |  | ION=[M+H+H] <sup>2+</sup>  |             | 4366.00   | 856.33   | 551.83  | 0.00     |
| 986  | 310.15 | 1487.73668 |        |                                                                          |              |  | ION=[M+H+H2] <sup>3+</sup> |             | 6851.38   | 68.67    | 853.50  | 617.00   |
| 987  | 310.33 | 1129.62753 |        |                                                                          |              |  | ION=[M+H+H] <sup>2+</sup>  |             | 6456.46   | 903.83   | 328.50  | 75.00    |
| 988  | 310.47 | 1062.53227 |        |                                                                          |              |  | ION=[M+H+H] <sup>2+</sup>  |             | 3358.92   | 1902.33  | 4055.67 | 2659.00  |
| 989  | 310.69 | 1691.77555 |        |                                                                          |              |  | ION=[M+H+H2] <sup>3+</sup> |             | 6946.46   | 224.17   | 1350.00 | 416.33   |
| 990  | 310.93 | 221.09561  |        |                                                                          |              |  | ION=[M+H] <sup>+</sup>     |             | 581.54    | 395.67   | 2653.83 | 434.00   |
| 991  | 311.2  | 597.4772   |        |                                                                          |              |  | ION=[M+H+H] <sup>2+</sup>  |             | 129638.00 | 0.00     | 0.00    | 466.33   |
| 992  | 311.44 | 872.50438  | 19.096 | Marformycin C                                                            | C43H68N8O11  |  | ION=[M+H+H] <sup>2+</sup>  |             | 363.54    | 6814.67  | 130.67  | 652.00   |
| 993  | 311.51 | 810.42817  | 6.01   | [DMAdda3]Nodularin-R                                                     | C40H58N8O10  |  | ION=[M+H] <sup>+</sup>     |             | 4.62      | 54.33    | 1352.17 | 11911.00 |
| 994  | 311.51 | 925.49361  |        |                                                                          |              |  | ION=[M+H] <sup>+</sup>     |             | 0.00      | 128.00   | 1844.83 | 18950.00 |
| 995  | 311.64 | 1792.82477 |        |                                                                          |              |  | ION=[M+H+H2] <sup>3+</sup> |             | 3156.92   | 0.00     | 378.00  | 0.00     |
| 996  | 311.66 | 810.41702  |        |                                                                          |              |  | ION=[M+H+H] <sup>2+</sup>  |             | 188.00    | 325.50   | 3154.17 | 28799.00 |
| 997  | 311.97 | 925.48098  |        |                                                                          |              |  | ION=[M+H+H] <sup>2+</sup>  |             | 26.77     | 944.33   | 5342.50 | 46177.00 |
| 998  | 311.99 | 1190.58766 | 14.482 | Janthinocin B                                                            | C57H82N12O16 |  | ION=[M+H+H] <sup>2+</sup>  |             | 1821.54   | 229.67   | 917.83  | 1395.67  |
| 999  | 312.09 | 180.08293  |        |                                                                          |              |  | ION=[M+H] <sup>+</sup>     |             | 1066.00   | 1975.50  | 198.50  | 39.33    |
| 1000 | 312.48 | 385.10644  |        |                                                                          |              |  | ION=[M+H] <sup>+</sup>     |             | 0.00      | 2797.33  | 10.33   | 22.67    |
| 1001 | 313.13 | 790.24311  |        |                                                                          |              |  | ION=[M+H+H] <sup>2+</sup>  |             | 0.00      | 2095.50  | 0.00    | 0.00     |
| 1002 | 313.24 | 816.42013  |        |                                                                          |              |  | ION=[M+H+H] <sup>2+</sup>  |             | 1479.38   | 1470.50  | 270.50  | 1256.67  |
| 1003 | 314.12 | 1505.80699 |        |                                                                          |              |  | ION=[M+H+H2] <sup>3+</sup> |             | 159.69    | 1779.67  | 15.50   | 75.67    |
| 1004 | 314.44 | 968.40283  |        |                                                                          |              |  | ION=[M+H] <sup>+</sup>     |             | 0.00      | 0.00     | 0.00    | 5148.67  |
| 1005 | 314.89 | 357.20047  | 18.591 | AB-CHMINACA metabolite M2                                                | C20H27N3O3   |  | ION=[M+H] <sup>+</sup>     |             | 2611.23   | 638.83   | 489.50  | 3607.33  |
| 1006 | 314.93 | 879.46332  |        |                                                                          |              |  | ION=[M+H+H] <sup>2+</sup>  |             | 1522.00   | 7318.00  | 1094.00 | 4592.67  |
| 1007 | 315.64 | 315.21589  |        |                                                                          |              |  | ION=[M+H] <sup>+</sup>     |             | 4090.62   | 1102.50  | 1746.83 | 4591.67  |
| 1008 | 315.67 | 1668.91484 |        |                                                                          |              |  | ION=[M+H+H2] <sup>3+</sup> |             | 1951.08   | 218.83   | 67.50   | 361.33   |
| 1009 | 316.3  | 808.42651  |        |                                                                          |              |  | ION=[M+H+H] <sup>2+</sup>  |             | 9618.46   | 16533.50 | 3090.17 | 1002.67  |
| 1010 | 316.43 | 1613.82694 |        |                                                                          |              |  | ION=[M+H+H2] <sup>3+</sup> |             | 580.62    | 1617.33  | 171.83  | 83.67    |
| 1011 | 317.14 | 1433.72121 |        |                                                                          |              |  | ION=[M+H+H2] <sup>3+</sup> |             | 14.62     | 1710.17  | 21.17   | 27.33    |
| 1012 | 317.65 | 371.27844  |        |                                                                          |              |  | ION=[M+H] <sup>+</sup>     |             | 0.00      | 8352.00  | 0.00    | 0.00     |
| 1013 | 317.84 | 1184.64223 |        |                                                                          |              |  | ION=[M+H+H] <sup>2+</sup>  |             | 1461.69   | 87.17    | 0.00    | 78.00    |
| 1014 | 318.9  | 1447.67676 |        |                                                                          |              |  | ION=[M+H+H] <sup>2+</sup>  |             | 13.23     | 599.83   | 32.00   | 37.67    |
| 1015 | 318.92 | 770.30899  |        |                                                                          |              |  | ION=[M+H+H] <sup>2+</sup>  |             | 417.38    | 97.83    | 1795.00 | 0.00     |
| 1016 | 319.22 | 1329.70812 |        |                                                                          |              |  | ION=[M+H+H] <sup>2+</sup>  |             | 2320.31   | 2137.33  | 466.33  | 25.00    |
| 1017 | 319.26 | 572.28209  | NA     | Anabaenolysin var 9                                                      | C29H40N4O8   |  | ION=[M+H] <sup>+</sup>     |             | 107.54    | 544.50   | 36.33   | 87.00    |
| 1018 | 319.36 | 1202.65218 |        |                                                                          |              |  | ION=[M+H+H] <sup>2+</sup>  |             | 1778.62   | 165.33   | 132.67  | 492.67   |
| 1019 | 319.8  | 1403.74301 |        |                                                                          |              |  | ION=[M+H+H2] <sup>3+</sup> |             | 542.31    | 2455.83  | 85.50   | 23.00    |
| 1020 | 319.82 | 1604.73987 |        |                                                                          |              |  | ION=[M+H+H2] <sup>3+</sup> |             | 1479.54   | 20.33    | 302.67  | 300.67   |
| 1021 | 319.86 | 294.10862  | 16.155 | 7-Methoxy-6-(1,2,3-trihydroxy-3-methylbutyl)-2H-chromen-2-one            | C15H18O6     |  | ION=[M+H] <sup>+</sup>     |             | 42.77     | 126.00   | 2399.00 | 108.00   |
| 1022 | 319.87 | 1692.94856 |        |                                                                          |              |  | ION=[M+H+H2] <sup>3+</sup> |             | 548.15    | 138.17   | 2024.67 | 785.00   |
| 1023 | 320.14 | 900.005    |        |                                                                          |              |  | ION=[M+H+H] <sup>2+</sup>  |             | 0.00      | 2057.50  | 61.67   | 0.00     |
| 1024 | 320.23 | 236.0927   | 17.875 | Carbazochrome                                                            | C10H12N4O3   |  | ION=[M+H] <sup>+</sup>     | 69-81-8     | 805.38    | 2992.83  | 613.50  | 89.67    |
| 1025 | 320.26 | 574.32215  |        |                                                                          |              |  | ION=[M+H] <sup>+</sup>     |             | 189.69    | 52.83    | 3564.50 | 101.33   |
| 1026 | 320.33 | 899.50324  |        |                                                                          |              |  | ION=[M+H+H] <sup>2+</sup>  |             | 121.23    | 1982.00  | 141.50  | 76.00    |
| 1027 | 320.56 | 1685.88791 |        |                                                                          |              |  | ION=[M+H+H2] <sup>3+</sup> |             | 2056.15   | 153.33   | 53.83   | 0.00     |
| 1028 | 320.72 | 500.32066  |        |                                                                          |              |  | ION=[M+H] <sup>+</sup>     |             | 10921.38  | 0.00     | 392.50  | 0.00     |
| 1029 | 320.77 | 1466.72755 |        |                                                                          |              |  | ION=[M+H+H] <sup>2+</sup>  |             | 254.92    | 85.17    | 2810.67 | 243.67   |
| 1030 | 320.85 | 1466.22537 |        |                                                                          |              |  | ION=[M+H+H] <sup>2+</sup>  |             | 0.00      | 0.00     | 2502.67 | 62.00    |
| 1031 | 321.01 | 1465.72727 |        |                                                                          |              |  | ION=[M+H+H] <sup>2+</sup>  |             | 55.23     | 9.33     | 1691.17 | 31.67    |
| 1032 | 321.04 | 579.98282  |        |                                                                          |              |  | ION=[M+H] <sup>+</sup>     |             | 5120.62   | 231.00   | 26.00   | 41.33    |
| 1033 | 321.05 | 680.22516  |        |                                                                          |              |  | ION=[M+H+H] <sup>2+</sup>  |             | 80.31     | 3755.67  | 0.00    | 38.67    |
| 1034 | 321.36 | 1741.94534 |        |                                                                          |              |  | ION=[M+H+H2] <sup>3+</sup> |             | 2761.23   | 90.50    | 0.00    | 13.33    |
| 1035 | 321.66 | 212.10657  | 9.336  | Rabenzazole                                                              | C12H12N4     |  | ION=[M+H] <sup>+</sup>     |             | 5528.00   | 6287.00  | 3704.67 | 2167.33  |
| 1036 | 321.74 | 1040.57494 |        |                                                                          |              |  | ION=[M+H+H] <sup>2+</sup>  |             | 2549.85   | 364.67   | 1996.33 | 883.67   |
| 1037 | 322.03 | 381.13291  | 16.154 | Metatacarboline A                                                        | C20H19N3O5   |  | ION=[M+H] <sup>+</sup>     |             | 460.00    | 18566.33 | 1114.33 | 552.67   |
| 1038 | 322.14 | 953.47452  | 26.042 | [Asp3]MC-LE                                                              | C47H67N7O14  |  | ION=[M+H+H] <sup>2+</sup>  |             | 93.08     | 64.00    | 622.50  | 7797.33  |
| 1039 | 322.22 | 288.11126  | 14.61  | Ethyl 2-cyano-2-[4-(hydroxymethyl)-5-phenyl-1,3-oxazol-2-ylidene]acetate | C15H16N2O4   |  | ION=[M+H] <sup>+</sup>     |             | 2770.62   | 2654.17  | 2017.00 | 2831.67  |
| 1040 | 322.78 | 824.4453   |        |                                                                          |              |  | ION=[M+H] <sup>+</sup>     |             | 10.62     | 0.00     | 436.67  | 4709.00  |
| 1041 | 322.78 | 838.41232  |        |                                                                          |              |  | ION=[M+H+H] <sup>2+</sup>  |             | 6.46      | 105.33   | 294.83  | 3779.67  |
| 1042 | 322.82 | 824.43298  |        |                                                                          |              |  | ION=[M+H+H] <sup>2+</sup>  |             | 278.46    | 102.33   | 1891.00 | 14494.67 |



|      |        |            |        |                                        |            |                |             |          |          |          |          |
|------|--------|------------|--------|----------------------------------------|------------|----------------|-------------|----------|----------|----------|----------|
| 1043 | 322.82 | 939.49611  |        |                                        |            | ION=[M+H+H]2+  |             | 0.00     | 135.67   | 2306.67  | 17753.67 |
| 1044 | 322.93 | 465.22145  |        |                                        |            | ION=[M+H]+     |             | 340.46   | 28.00    | 2052.67  | 94.00    |
| 1045 | 322.97 | 1160.60882 |        |                                        |            | ION=[M+H+H]2+  |             | 19686.31 | 3914.17  | 2692.83  | 866.00   |
| 1046 | 323.16 | 1362.66363 |        |                                        |            | ION=[M+H+H]2+  |             | 1398.15  | 304.50   | 236.33   | 196.00   |
| 1047 | 323.57 | 470.34649  |        |                                        |            | ION=[M+H]+     |             | 10312.92 | 0.00     | 0.00     | 0.00     |
| 1048 | 324.04 | 515.94599  |        |                                        |            | ION=[M+H]+     |             | 407.23   | 0.00     | 0.00     | 0.00     |
| 1049 | 324.43 | 1689.79639 |        |                                        |            | ION=[M+H+H2]3+ |             | 2776.46  | 95.83    | 446.33   | 511.33   |
| 1050 | 324.62 | 1547.8408  |        |                                        |            | ION=[M+H+H2]3+ |             | 1058.46  | 353.83   | 162.00   | 31.33    |
| 1051 | 324.86 | 1073.57249 |        |                                        |            | ION=[M+H+H]2+  |             | 21032.92 | 5121.83  | 1774.17  | 1037.33  |
| 1052 | 325.09 | 1810.9886  |        |                                        |            | ION=[M+H+H2]3+ |             | 1270.31  | 265.50   | 15.00    | 0.00     |
| 1053 | 325.62 | 1536.82342 |        |                                        |            | ION=[M+H+H2]3+ |             | 14730.62 | 3579.67  | 894.50   | 1727.33  |
| 1054 | 325.62 | 102.06749  | 3.54   | Isovaleric acid                        | C5H10O2    | ION=[M+H]+     |             | 1100.77  | 1799.67  | 3401.00  | 1808.00  |
| 1055 | 325.94 | 146.09435  | 5.206  | Propanoic acid, 3-ethoxy-, ethyl ester | C7H14O3    | ION=[M+H]+     |             | 1749.69  | 2526.50  | 5346.50  | 2636.67  |
| 1056 | 326.09 | 1858.96809 |        |                                        |            | ION=[M+H+H2]3+ |             | 80.31    | 68.50    | 1799.33  | 216.33   |
| 1057 | 326.1  | 239.17386  |        |                                        |            | ION=[M+H]+     |             | 22427.85 | 30179.67 | 42258.67 | 20562.33 |
| 1058 | 326.26 | 1788.88842 |        |                                        |            | ION=[M+H+H2]3+ |             | 563.69   | 7249.33  | 820.33   | 256.33   |
| 1059 | 326.47 | 1537.82732 |        |                                        |            | ION=[M+H+H2]3+ |             | 11822.92 | 2919.17  | 693.50   | 1427.67  |
| 1060 | 326.53 | 240.05872  |        |                                        |            | ION=[M+H]+     |             | 40.92    | 2325.00  | 51.17    | 0.00     |
| 1061 | 326.82 | 670.40366  |        |                                        |            | ION=[M+H]+     |             | 1223.85  | 0.00     | 0.00     | 0.00     |
| 1062 | 326.93 | 661.51485  |        |                                        |            | ION=[M+H]+     |             | 693.08   | 0.00     | 0.00     | 0.00     |
| 1063 | 326.93 | 1790.85757 |        |                                        |            | ION=[M+H+H2]3+ |             | 1052.46  | 133.00   | 272.00   | 86.67    |
| 1064 | 327.05 | 1323.53385 |        |                                        |            | ION=[M+H+H]2+  |             | 2902.00  | 999.33   | 556.33   | 619.67   |
| 1065 | 327.05 | 1607.86147 |        |                                        |            | ION=[M+H+H2]3+ |             | 6291.69  | 0.00     | 742.17   | 230.00   |
| 1066 | 327.1  | 216.09292  |        |                                        |            | ION=[M+H]+     |             | 3700.31  | 2388.17  | 421.83   | 1464.67  |
| 1067 | 327.11 | 1323.03331 |        |                                        |            | ION=[M+H+H]2+  |             | 1421.23  | 666.17   | 453.17   | 423.67   |
| 1068 | 327.32 | 1443.79112 |        |                                        |            | ION=[M+H+H2]3+ |             | 756.92   | 4923.33  | 360.00   | 306.33   |
| 1069 | 327.6  | 631.46228  |        |                                        |            | ION=[M+H+H]2+  |             | 10375.23 | 0.00     | 0.00     | 21.67    |
| 1070 | 327.71 | 1400.74519 |        |                                        |            | ION=[M+H+H]2+  |             | 1037.54  | 1903.50  | 2481.00  | 90.33    |
| 1071 | 327.72 | 1138.65348 |        |                                        |            | ION=[M+H+H]2+  |             | 0.00     | 7488.00  | 3199.17  | 605.00   |
| 1072 | 328.37 | 219.0772   |        |                                        |            | ION=[M+H]+     |             | 3628.00  | 1208.83  | 5573.67  | 2600.00  |
| 1073 | 328.66 | 571.1812   |        |                                        |            | ION=[M+H]+     |             | 9492.00  | 32206.83 | 11981.67 | 16182.00 |
| 1074 | 329.24 | 1447.7377  |        |                                        |            | ION=[M+H+H]2+  |             | 3033.38  | 2450.50  | 333.17   | 128.33   |
| 1075 | 329.56 | 347.10304  | 13.396 | Pseurotin H                            | C17H17NO7  | ION=[M+H]+     |             | 1277.54  | 5691.17  | 1104.83  | 0.00     |
| 1076 | 329.7  | 700.26277  |        |                                        |            | ION=[M+H]+     |             | 11062.77 | 1411.50  | 5444.67  | 3497.00  |
| 1077 | 330.64 | 1171.63361 |        |                                        |            | ION=[M+H+H2]3+ |             | 13.69    | 5251.67  | 35.67    | 97.67    |
| 1078 | 331.4  | 1111.48949 |        |                                        |            | ION=[M+H+H]2+  |             | 1314.77  | 0.00     | 297.17   | 3566.67  |
| 1079 | 331.65 | 782.45969  |        |                                        |            | ION=[M+H+H]2+  |             | 277.23   | 2682.00  | 250.50   | 63.00    |
| 1080 | 331.83 | 1485.5227  |        |                                        |            | ION=[M+H+H]2+  |             | 327.54   | 2585.67  | 0.00     | 0.00     |
| 1081 | 331.86 | 1691.89361 |        |                                        |            | ION=[M+H+H2]3+ |             | 1368.92  | 488.33   | 2393.50  | 728.33   |
| 1082 | 331.99 | 1508.86919 |        |                                        |            | ION=[M+H+H2]3+ |             | 811.23   | 1910.17  | 5151.17  | 692.00   |
| 1083 | 332.07 | 1123.60181 |        |                                        |            | ION=[M+H+H]2+  |             | 1944.62  | 1926.33  | 898.33   | 1018.00  |
| 1084 | 332.26 | 564.29691  |        |                                        |            | ION=[M+H]+     |             | 1426.46  | 660.50   | 2357.50  | 1048.00  |
| 1085 | 332.71 | 359.20546  |        |                                        |            | ION=[M+H]+     |             | 2830.92  | 729.50   | 1666.67  | 2224.00  |
| 1086 | 332.99 | 2052.93966 |        |                                        |            | ION=[M+H+H2]3+ |             | 1295.38  | 15.33    | 216.17   | 0.00     |
| 1087 | 334.11 | 401.2259   |        |                                        |            | ION=[M+H]+     |             | 1537.69  | 645.50   | 402.17   | 2488.67  |
| 1088 | 334.65 | 668.23654  |        |                                        |            | ION=[M+H]+     |             | 4657.69  | 22043.17 | 6261.00  | 3427.33  |
| 1089 | 335.22 | 343.24698  |        |                                        |            | ION=[M+H]+     |             | 5244.15  | 988.50   | 1872.67  | 5467.00  |
| 1090 | 335.31 | 929.52611  |        |                                        |            | ION=[M+H+H]2+  |             | 54.77    | 3368.00  | 563.00   | 42.00    |
| 1091 | 335.57 | 1140.55394 |        |                                        |            | ION=[M+H+H]2+  |             | 1118.62  | 1058.33  | 715.83   | 260.67   |
| 1092 | 335.59 | 524.35308  |        |                                        |            | ION=[M+H+H]2+  |             | 8021.54  | 0.00     | 0.00     | 0.00     |
| 1093 | 335.79 | 2123.97926 |        |                                        |            | ION=[M+H+H2]3+ |             | 1727.85  | 0.00     | 953.00   | 30.00    |
| 1094 | 335.85 | 570.27584  |        |                                        |            | ION=[M+H]+     |             | 388.31   | 92.50    | 0.00     | 0.00     |
| 1095 | 335.97 | 1590.32295 |        |                                        |            | ION=[M+H+H]2+  |             | 0.00     | 2809.83  | 7.00     | 12.67    |
| 1096 | 336.02 | 1589.8208  |        |                                        |            | ION=[M+H+H]2+  |             | 33.08    | 3015.00  | 27.50    | 0.00     |
| 1097 | 336.12 | 1589.31998 |        |                                        |            | ION=[M+H+H]2+  |             | 0.00     | 2085.67  | 9.67     | 0.00     |
| 1098 | 336.71 | 661.26     |        |                                        |            | ION=[M+H+H]2+  |             | 0.00     | 25.33    | 9.67     | 4226.00  |
| 1099 | 337.07 | 365.19558  |        |                                        |            | ION=[M+H]+     |             | 3692.92  | 1958.00  | 1933.83  | 5027.33  |
| 1100 | 338.02 | 1615.86903 |        |                                        |            | ION=[M+H+H2]3+ |             | 222.46   | 1373.33  | 70.50    | 147.33   |
| 1101 | 338.27 | 1211.58925 |        |                                        |            | ION=[M+H+H]2+  |             | 4874.62  | 795.67   | 389.00   | 221.00   |
| 1102 | 338.68 | 431.27312  |        |                                        |            | ION=[M+H]+     |             | 2470.31  | 1064.67  | 354.33   | 3375.67  |
| 1103 | 339.57 | 364.1993   |        |                                        |            | ION=[M+H]+     |             | 693.85   | 2197.83  | 964.83   | 1510.33  |
| 1104 | 339.71 | 754.49049  |        |                                        |            | ION=[M+H+H]2+  |             | 1179.38  | 1002.00  | 4574.00  | 1924.00  |
| 1105 | 339.79 | 155.09517  | 5.032  | Arecoline                              | C8H13NO2   | ION=[M+H]+     |             | 2462.00  | 5287.17  | 1204.83  | 7120.33  |
| 1106 | 340.03 | 846.40331  |        |                                        |            | ION=[M+H+H]2+  |             | 0.00     | 0.00     | 445.50   | 346.67   |
| 1107 | 340.13 | 423.20057  |        |                                        |            | ION=[M+H]+     |             | 3446.62  | 295.33   | 3573.67  | 1152.00  |
| 1108 | 340.54 | 950.50944  |        |                                        |            | ION=[M+H+H]2+  |             | 392.46   | 1529.67  | 401.00   | 384.00   |
| 1109 | 340.54 | 333.133    | 18.371 | Golotimod                              | C16H19N3O5 | ION=[M+H]+     | 229305-39-9 | 4707.54  | 7088.00  | 13362.33 | 9351.33  |
| 1110 | 340.57 | 1854.99453 |        |                                        |            | ION=[M+H+H2]3+ |             | 293.23   | 2432.83  | 2141.00  | 894.00   |
| 1111 | 340.6  | 312.14772  | 13.123 | OSU-HDAC42                             | C18H20N2O3 | ION=[M+H]+     | 935881-37-1 | 10301.08 | 1837.83  | 2778.67  | 8895.33  |
| 1112 | 341.24 | 1258.15031 |        |                                        |            | ION=[M+H+H]2+  |             | 1264.77  | 0.00     | 292.50   | 0.00     |
| 1113 | 341.42 | 1433.23425 |        |                                        |            | ION=[M+H+H]2+  |             | 218.92   | 1379.33  | 31.83    | 0.00     |
| 1114 | 341.72 | 377.23134  |        |                                        |            | ION=[M+H]+     |             | 204.92   | 2280.83  | 65.50    | 557.67   |
| 1115 | 341.75 | 1215.66329 |        |                                        |            | ION=[M+H+H]2+  |             | 520.15   | 2311.17  | 37.17    | 127.33   |
| 1116 | 341.77 | 601.19246  |        |                                        |            | ION=[M+H]+     |             | 8277.69  | 623.83   | 412.50   | 1586.67  |



|      |        |            |        |                                                                        |             |                           |              |          |          |          |          |
|------|--------|------------|--------|------------------------------------------------------------------------|-------------|---------------------------|--------------|----------|----------|----------|----------|
| 1117 | 341.85 | 651.0837   |        |                                                                        |             | ION=[M+H] <sup>+</sup>    |              | 1141.08  | 21.00    | 105.67   | 0.00     |
| 1118 | 341.85 | 1301.66672 |        |                                                                        |             | ION=[M+H+H] <sup>2+</sup> |              | 1490.62  | 55.00    | 345.50   | 334.00   |
| 1119 | 342.13 | 805.83485  |        |                                                                        |             | ION=[M+H] <sup>+</sup>    |              | 23.08    | 0.00     | 3834.17  | 130.33   |
| 1120 | 342.29 | 1346.67191 |        |                                                                        |             | ION=[M+H+H] <sup>2+</sup> |              | 14346.15 | 1149.50  | 650.83   | 707.67   |
| 1121 | 342.93 | 1096.07795 |        |                                                                        |             | ION=[M+H+H] <sup>2+</sup> |              | 1552.46  | 3501.17  | 2081.00  | 588.33   |
| 1122 | 343.05 | 386.21588  |        |                                                                        |             | ION=[M+H] <sup>+</sup>    |              | 2985.38  | 533.17   | 1834.00  | 1901.33  |
| 1123 | 343.07 | 1096.5767  |        |                                                                        |             | ION=[M+H+H] <sup>2+</sup> |              | 1960.92  | 4170.83  | 2585.33  | 1037.67  |
| 1124 | 343.45 | 1442.81606 |        |                                                                        |             | ION=[M+H+H] <sup>2+</sup> |              | 2423.38  | 290.33   | 402.33   | 254.33   |
| 1125 | 343.99 | 771.01455  |        |                                                                        |             | ION=[M+H] <sup>+</sup>    |              | 0.00     | 0.00     | 3535.00  | 94.33    |
| 1126 | 344.32 | 2223.04627 |        |                                                                        |             | ION=[M+H+H] <sup>2+</sup> |              | 14095.54 | 77.33    | 455.50   | 0.00     |
| 1127 | 344.4  | 771.41536  |        |                                                                        |             | ION=[M+H] <sup>+</sup>    |              | 0.00     | 80.67    | 7372.00  | 334.00   |
| 1128 | 344.59 | 242.12675  | 18.417 | 2,4-Diamino-6-Phenyl-5,6,7,8-Tetrahydropteridine                       | C12H14N6    | ION=[M+H] <sup>+</sup>    |              | 3009.38  | 417.67   | 515.00   | 1866.00  |
| 1129 | 344.83 | 1231.64185 |        |                                                                        |             | ION=[M+H+H] <sup>2+</sup> |              | 10020.77 | 3479.83  | 571.83   | 170.00   |
| 1130 | 344.98 | 771.21503  |        |                                                                        |             | ION=[M+H] <sup>+</sup>    |              | 17.38    | 81.33    | 6746.83  | 364.67   |
| 1131 | 345.33 | 1815.96947 |        |                                                                        |             | ION=[M+H+H] <sup>2+</sup> |              | 1261.69  | 1381.50  | 150.83   | 272.67   |
| 1132 | 345.49 | 365.13783  | 14.666 | 3-{3-[(3,4-dihydroxybutoxy)amino]-1H-indol-2-yl}-2H-indol-2-one        | C20H19N3O4  | ION=[M+H] <sup>+</sup>    |              | 3581.69  | 10493.33 | 4092.83  | 1692.00  |
| 1133 | 345.86 | 1951.95445 |        |                                                                        |             | ION=[M+H+H] <sup>2+</sup> |              | 999.08   | 1566.00  | 0.00     | 99.00    |
| 1134 | 346    | 1576.78665 |        |                                                                        |             | ION=[M+H+H] <sup>2+</sup> |              | 2403.69  | 2703.17  | 222.50   | 128.67   |
| 1135 | 346.29 | 1575.77749 |        |                                                                        |             | ION=[M+H+H] <sup>2+</sup> |              | 2426.62  | 3381.00  | 220.17   | 171.00   |
| 1136 | 346.3  | 407.20652  |        |                                                                        |             | ION=[M+H] <sup>+</sup>    |              | 2272.46  | 397.33   | 1687.67  | 1522.67  |
| 1137 | 346.54 | 1632.80089 |        |                                                                        |             | ION=[M+H+H] <sup>2+</sup> |              | 3178.00  | 2188.83  | 1155.50  | 415.33   |
| 1138 | 346.96 | 226.97776  |        |                                                                        |             | ION=[M+H] <sup>+</sup>    |              | 4010.15  | 3359.67  | 2769.33  | 2424.67  |
| 1139 | 347.18 | 1222.13349 |        |                                                                        |             | ION=[M+H+H] <sup>2+</sup> |              | 1497.08  | 29.67    | 0.00     | 0.00     |
| 1140 | 347.32 | 1222.62378 |        |                                                                        |             | ION=[M+H+H] <sup>2+</sup> |              | 2283.85  | 297.50   | 209.83   | 299.00   |
| 1141 | 349.34 | 1234.69609 |        |                                                                        |             | ION=[M+H+H] <sup>2+</sup> |              | 1135.23  | 17.33    | 23.00    | 0.00     |
| 1142 | 350.85 | 1670.92472 |        |                                                                        |             | ION=[M+H+H] <sup>2+</sup> |              | 0.00     | 1292.17  | 51.67    | 25.67    |
| 1143 | 351.09 | 555.1865   |        |                                                                        |             | ION=[M+H] <sup>+</sup>    |              | 8842.46  | 16502.33 | 21624.83 | 11009.67 |
| 1144 | 351.22 | 1012.54387 |        |                                                                        |             | ION=[M+H+H] <sup>2+</sup> |              | 4860.77  | 280.00   | 863.83   | 689.00   |
| 1145 | 351.22 | 1013.04704 |        |                                                                        |             | ION=[M+H+H] <sup>2+</sup> |              | 5050.00  | 137.33   | 805.67   | 178.67   |
| 1146 | 351.22 | 1442.79231 |        |                                                                        |             | ION=[M+H+H] <sup>2+</sup> |              | 5140.46  | 15.83    | 94.33    | 80.67    |
| 1147 | 351.32 | 239.05028  |        |                                                                        |             | ION=[M+H] <sup>+</sup>    |              | 145.69   | 1151.17  | 273.00   | 4054.33  |
| 1148 | 351.36 | 2083.10381 |        |                                                                        |             | ION=[M+H+H] <sup>2+</sup> |              | 226.62   | 1344.50  | 922.50   | 0.00     |
| 1149 | 351.81 | 1270.74534 |        |                                                                        |             | ION=[M+H+H] <sup>2+</sup> |              | 4041.69  | 0.00     | 90.83    | 175.00   |
| 1150 | 351.97 | 290.12966  | 7.242  | N,N'-Bis(tert-butoxycarbonyl)-S-methylisothiourea                      | C12H22N2O4S | ION=[M+H] <sup>+</sup>    | 107819-90-9  | 815.54   | 616.17   | 10798.33 | 475.33   |
| 1151 | 352.01 | 475.29973  |        |                                                                        |             | ION=[M+H] <sup>+</sup>    |              | 1292.31  | 573.50   | 234.67   | 1915.00  |
| 1152 | 352.04 | 2154.14729 |        |                                                                        |             | ION=[M+H+H] <sup>2+</sup> |              | 209.85   | 519.67   | 2850.33  | 638.00   |
| 1153 | 352.27 | 117.07834  | 4.707  | L(+)-norvaline   L-norvaline                                           | C5H11NO2    | ION=[M+H] <sup>+</sup>    |              | 333.38   | 117.17   | 4904.00  | 47.00    |
| 1154 | 352.47 | 1387.70919 |        |                                                                        |             | ION=[M+H+H] <sup>2+</sup> |              | 1468.00  | 31.50    | 97.00    | 74.00    |
| 1155 | 352.68 | 212.10673  | 12.883 | (E)-2-(1,5-dihydroxypent-2-en-2-yl)-3-(hydroxymethyl)cyclopent-2-enone | C11H16O4    | ION=[M+H] <sup>+</sup>    |              | 10121.85 | 11653.00 | 4569.67  | 3979.33  |
| 1156 | 352.74 | 723.15579  |        |                                                                        |             | ION=[M+H+H] <sup>2+</sup> |              | 1705.85  | 6201.00  | 6311.33  | 2512.67  |
| 1157 | 352.76 | 708.19112  |        |                                                                        |             | ION=[M+H+H] <sup>2+</sup> |              | 1764.62  | 7357.17  | 7126.83  | 199.33   |
| 1158 | 353.26 | 283.19955  |        |                                                                        |             | ION=[M+H] <sup>+</sup>    |              | 6210.00  | 6509.50  | 10163.83 | 5421.33  |
| 1159 | 353.27 | 566.39937  |        |                                                                        |             | ION=[M+H+H] <sup>2+</sup> |              | 612.62   | 902.67   | 1573.50  | 0.00     |
| 1160 | 353.43 | 1251.73805 |        |                                                                        |             | ION=[M+H+H] <sup>2+</sup> |              | 0.00     | 8963.83  | 213.33   | 279.33   |
| 1161 | 353.65 | 361.57699  |        |                                                                        |             | ION=[M+H] <sup>+</sup>    |              | 402.15   | 0.00     | 0.00     | 0.00     |
| 1162 | 353.78 | 1177.60923 |        |                                                                        |             | ION=[M+H+H] <sup>2+</sup> |              | 1479.54  | 192.83   | 112.67   | 229.33   |
| 1163 | 354.01 | 576.34365  |        |                                                                        |             | ION=[M+H+H] <sup>2+</sup> |              | 4541.54  | 0.00     | 88.67    | 113.33   |
| 1164 | 354.06 | 376.1384   | 24.407 | N-methylwelwitindolinone D isonitrile                                  | C22H20N2O4  | ION=[M+H] <sup>+</sup>    |              | 2982.15  | 1408.33  | 2106.00  | 1509.33  |
| 1165 | 354.11 | 907.49501  |        |                                                                        |             | ION=[M+H+H] <sup>2+</sup> |              | 9430.62  | 3668.67  | 141.83   | 113.00   |
| 1166 | 355.31 | 1092.5374  |        |                                                                        |             | ION=[M+H+H] <sup>2+</sup> |              | 383.85   | 2426.33  | 252.00   | 122.00   |
| 1167 | 355.64 | 347.11225  |        |                                                                        |             | ION=[M+H] <sup>+</sup>    |              | 2622.31  | 10332.50 | 2645.17  | 0.00     |
| 1168 | 355.84 | 1634.84802 |        |                                                                        |             | ION=[M+H+H] <sup>2+</sup> |              | 17062.92 | 1479.17  | 473.50   | 112.67   |
| 1169 | 355.86 | 1493.26753 |        |                                                                        |             | ION=[M+H+H] <sup>2+</sup> |              | 996.15   | 32.17    | 0.00     | 0.00     |
| 1170 | 355.92 | 1493.76848 |        |                                                                        |             | ION=[M+H+H] <sup>2+</sup> |              | 2087.23  | 79.33    | 38.50    | 38.33    |
| 1171 | 355.92 | 1070.06849 |        |                                                                        |             | ION=[M+H+H] <sup>2+</sup> |              | 1874.00  | 52.33    | 34.00    | 270.67   |
| 1172 | 356.06 | 1494.27343 |        |                                                                        |             | ION=[M+H+H] <sup>2+</sup> |              | 1769.69  | 0.00     | 0.00     | 0.00     |
| 1173 | 356.06 | 746.63404  |        |                                                                        |             | ION=[M+H] <sup>+</sup>    |              | 447.08   | 16.17    | 0.00     | 0.00     |
| 1174 | 356.23 | 692.23401  |        |                                                                        |             | ION=[M+H+H] <sup>2+</sup> |              | 0.00     | 0.00     | 964.67   | 0.00     |
| 1175 | 356.24 | 1069.56827 |        |                                                                        |             | ION=[M+H+H] <sup>2+</sup> |              | 1709.08  | 559.33   | 316.00   | 583.67   |
| 1176 | 356.95 | 2363.17998 |        |                                                                        |             | ION=[M+H+H] <sup>2+</sup> |              | 456.46   | 4274.00  | 0.00     | 18.33    |
| 1177 | 357.84 | 211.12215  |        |                                                                        |             | ION=[M+H] <sup>+</sup>    |              | 438.31   | 5193.33  | 31.67    | 114.00   |
| 1178 | 358.24 | 2310.12341 |        |                                                                        |             | ION=[M+H+H] <sup>2+</sup> |              | 0.00     | 1342.67  | 78.83    | 0.00     |
| 1179 | 358.43 | 183.09087  |        |                                                                        |             | ION=[M+H] <sup>+</sup>    |              | 2777.54  | 6216.33  | 127.17   | 2452.67  |
| 1180 | 358.53 | 434.25246  | 12.364 | ribociclib succinate                                                   | C23H30N8O   | ION=[M+H] <sup>+</sup>    | 1211441-98-3 | 133.54   | 40.17    | 160.67   | 9747.00  |
| 1181 | 358.56 | 972.50561  |        |                                                                        |             | ION=[M+H+H] <sup>2+</sup> |              | 1558.62  | 307.83   | 388.50   | 90.00    |
| 1182 | 359.08 | 1935.95888 |        |                                                                        |             | ION=[M+H+H] <sup>2+</sup> |              | 12717.08 | 9693.33  | 635.67   | 742.67   |
| 1183 | 359.22 | 1820.91184 |        |                                                                        |             | ION=[M+H+H] <sup>2+</sup> |              | 16646.92 | 75.33    | 236.67   | 674.33   |
| 1184 | 360.25 | 1305.72703 |        |                                                                        |             | ION=[M+H+H] <sup>2+</sup> |              | 377.08   | 1556.83  | 43.50    | 781.00   |
| 1185 | 360.36 | 1408.73984 |        |                                                                        |             | ION=[M+H+H] <sup>2+</sup> |              | 4612.31  | 3623.83  | 783.33   | 1564.67  |
| 1186 | 360.52 | 1245.65836 |        |                                                                        |             | ION=[M+H+H] <sup>2+</sup> |              | 1592.00  | 270.33   | 205.67   | 228.67   |

|      |        |            |        |                                  |               |                |             |          |          |          |         |
|------|--------|------------|--------|----------------------------------|---------------|----------------|-------------|----------|----------|----------|---------|
| 1187 | 360.53 | 1392.7617  |        |                                  |               | ION=[M+H+H2]3+ |             | 516.92   | 3952.00  | 311.33   | 376.67  |
| 1188 | 360.57 | 1416.74081 |        |                                  |               | ION=[M+H+H]2+  |             | 3136.46  | 136.00   | 204.17   | 452.33  |
| 1189 | 360.94 | 198.98431  |        |                                  |               | ION=[M+H]+     |             | 4934.31  | 4843.50  | 4588.50  | 3988.33 |
| 1190 | 361.51 | 645.81649  |        |                                  |               | ION=[M+H]+     |             | 267.23   | 1400.50  | 137.67   | 0.00    |
| 1191 | 362.02 | 243.05859  |        |                                  |               | ION=[M+H]+     |             | 0.00     | 2471.33  | 0.00     | 0.00    |
| 1192 | 362.02 | 1485.52454 |        |                                  |               | ION=[M+H+H]2+  |             | 172.31   | 1892.33  | 0.00     | 0.00    |
| 1193 | 362.34 | 2434.22575 |        |                                  |               | ION=[M+H+H2]3+ |             | 156.31   | 1700.17  | 159.33   | 210.33  |
| 1194 | 362.64 | 1089.09153 |        |                                  |               | ION=[M+H+H]2+  |             | 3336.62  | 662.83   | 24.83    | 0.00    |
| 1195 | 362.84 | 1032.07847 |        |                                  |               | ION=[M+H+H]2+  |             | 2717.38  | 129.83   | 47.00    | 0.00    |
| 1196 | 362.84 | 2221.07136 |        |                                  |               | ION=[M+H+H2]3+ |             | 3224.00  | 55.00    | 382.17   | 66.00   |
| 1197 | 362.84 | 357.26341  |        |                                  |               | ION=[M+H]+     |             | 3082.15  | 712.00   | 1043.33  | 3869.33 |
| 1198 | 363.1  | 1089.59121 |        |                                  |               | ION=[M+H+H]2+  |             | 3810.62  | 787.17   | 118.17   | 0.00    |
| 1199 | 363.17 | 1093.59527 |        |                                  |               | ION=[M+H+H]2+  |             | 16740.62 | 402.67   | 687.83   | 125.33  |
| 1200 | 363.44 | 1221.65494 |        |                                  |               | ION=[M+H+H]2+  |             | 9126.77  | 213.33   | 2695.67  | 732.00  |
| 1201 | 363.5  | 1031.57902 |        |                                  |               | ION=[M+H+H]2+  |             | 2282.15  | 162.50   | 42.17    | 0.00    |
| 1202 | 363.97 | 2276.1529  |        |                                  |               | ION=[M+H+H2]3+ |             | 361.08   | 4351.17  | 0.00     | 107.67  |
| 1203 | 364.33 | 1621.96332 | 13.816 | Ampullosporin                    | C77H127N19O19 | ION=[M+H+H2]3+ |             | 26.77    | 3000.67  | 17.00    | 111.00  |
| 1204 | 364.46 | 1633.91514 |        |                                  |               | ION=[M+H+H]2+  |             | 1922.46  | 0.00     | 0.00     | 0.00    |
| 1205 | 364.49 | 395.14822  |        |                                  |               | ION=[M+H]+     |             | 37484.77 | 81424.83 | 10487.17 | 9248.00 |
| 1206 | 365.97 | 393.19014  |        |                                  |               | ION=[M+H]+     |             | 3763.08  | 473.33   | 2310.83  | 2001.67 |
| 1207 | 366.44 | 1090.53061 |        |                                  |               | ION=[M+H+H]2+  |             | 3011.08  | 605.83   | 346.33   | 208.67  |
| 1208 | 366.44 | 1128.4691  |        |                                  |               | ION=[M+H+H2]3+ |             | 1331.85  | 410.50   | 22.50    | 110.33  |
| 1209 | 366.45 | 1170.39799 |        |                                  |               | ION=[M+H]+     |             | 3976.92  | 732.17   | 446.67   | 953.67  |
| 1210 | 366.52 | 1756.60053 |        |                                  |               | ION=[M+H+H]2+  |             | 3968.00  | 2074.00  | 754.33   | 1995.00 |
| 1211 | 366.56 | 638.10344  |        |                                  |               | ION=[M+H+H]2+  |             | 3274.92  | 2554.83  | 1845.67  | 2974.33 |
| 1212 | 366.61 | 1755.58907 |        |                                  |               | ION=[M+H+H]2+  |             | 6306.31  | 2322.33  | 808.83   | 2888.00 |
| 1213 | 366.66 | 585.69505  |        |                                  |               | ION=[M+H]+     |             | 12655.85 | 6575.83  | 2833.83  | 6832.33 |
| 1214 | 366.77 | 1168.37428 |        |                                  |               | ION=[M+H+H]2+  |             | 2730.00  | 2110.33  | 1490.00  | 3067.67 |
| 1215 | 366.84 | 1514.75024 |        |                                  |               | ION=[M+H+H]2+  |             | 1136.31  | 103.50   | 373.00   | 180.33  |
| 1216 | 366.97 | 647.33267  |        |                                  |               | ION=[M+H]+     |             | 452.00   | 1485.17  | 407.50   | 159.00  |
| 1217 | 367    | 371.16974  |        |                                  |               | ION=[M+H]+     |             | 34.62    | 2091.67  | 42.83    | 184.67  |
| 1218 | 367.29 | 1294.16939 |        |                                  |               | ION=[M+H+H]2+  |             | 0.00     | 1689.83  | 296.33   | 0.00    |
| 1219 | 367.42 | 371.89977  |        |                                  |               | ION=[M+H+H]2+  |             | 4479.38  | 6554.00  | 8334.83  | 4220.67 |
| 1220 | 367.65 | 2270.12498 |        |                                  |               | ION=[M+H+H2]3+ |             | 1266.31  | 0.00     | 10.83    | 0.00    |
| 1221 | 367.65 | 623.13974  |        |                                  |               | ION=[M+H+H]2+  |             | 2040.77  | 1352.67  | 1620.33  | 768.00  |
| 1222 | 367.66 | 2250.12719 |        |                                  |               | ION=[M+H+H2]3+ |             | 1062.92  | 210.50   | 374.17   | 0.00    |
| 1223 | 367.87 | 831.20134  |        |                                  |               | ION=[M+H]+     |             | 0.00     | 130.67   | 2185.50  | 17.67   |
| 1224 | 368.48 | 1723.00799 |        |                                  |               | ION=[M+H+H2]3+ |             | 0.00     | 2784.67  | 40.50    | 0.00    |
| 1225 | 368.54 | 831.40341  |        |                                  |               | ION=[M+H]+     |             | 152.15   | 354.33   | 2595.50  | 37.00   |
| 1226 | 368.57 | 1550.81791 |        |                                  |               | ION=[M+H+H]2+  |             | 7715.23  | 113.33   | 390.83   | 39.67   |
| 1227 | 369.09 | 274.13131  | 12.873 | Mablin                           | C10H18N4O5    | ION=[M+H]+     |             | 1579.38  | 1938.17  | 1192.67  | 1975.33 |
| 1228 | 369.64 | 1257.65117 |        |                                  |               | ION=[M+H+H]2+  |             | 353.38   | 1331.83  | 371.33   | 279.00  |
| 1229 | 369.83 | 612.23947  | 38.665 | Glycosylated Palythine-threonine | C24H40N2O16   | ION=[M+H+H]2+  |             | 813.85   | 421.83   | 4730.17  | 168.00  |
| 1230 | 369.89 | 442.31426  |        |                                  |               | ION=[M+H]+     |             | 1509.23  | 714.33   | 411.83   | 4456.67 |
| 1231 | 369.98 | 574.29708  |        |                                  |               | ION=[M+H]+     |             | 1107.54  | 207.33   | 5469.67  | 1433.33 |
| 1232 | 370.16 | 279.18368  | 15.766 | Tramadol N-Oxide                 | C16H25NO3     | ION=[M+H]+     |             | 0.00     | 3445.67  | 0.00     | 0.00    |
| 1233 | 370.71 | 1315.70239 |        |                                  |               | ION=[M+H+H]2+  |             | 386.92   | 1806.50  | 168.83   | 168.33  |
| 1234 | 370.77 | 1852.05906 |        |                                  |               | ION=[M+H+H2]3+ |             | 1560.15  | 296.17   | 162.83   | 0.00    |
| 1235 | 371.78 | 1007.54337 | 7.57   | Mulundocandin                    | C48H77N7O16   | ION=[M+H+H]2+  |             | 2364.46  | 148.00   | 49.00    | 293.00  |
| 1236 | 371.79 | 2064.07431 |        |                                  |               | ION=[M+H+H2]3+ |             | 1017.69  | 2336.83  | 1893.83  | 32.33   |
| 1237 | 371.99 | 1990.94022 |        |                                  |               | ION=[M+H+H2]3+ |             | 0.00     | 148.00   | 1891.17  | 0.00    |
| 1238 | 372.37 | 718.27984  |        |                                  |               | ION=[M+H+H]2+  |             | 294.46   | 2081.00  | 364.83   | 0.00    |
| 1239 | 372.49 | 680.33337  |        |                                  |               | ION=[M+H+H]2+  |             | 454.46   | 2453.50  | 469.50   | 0.00    |
| 1240 | 373.15 | 689.21669  |        |                                  |               | ION=[M+H+H]2+  |             | 244.92   | 1724.83  | 316.17   | 35.33   |
| 1241 | 373.28 | 720.17757  |        |                                  |               | ION=[M+H]+     |             | 56.31    | 24.17    | 3109.00  | 0.00    |
| 1242 | 373.37 | 1795.95008 |        |                                  |               | ION=[M+H+H]2+  |             | 74.62    | 0.00     | 425.17   | 0.00    |
| 1243 | 373.4  | 1683.89052 |        |                                  |               | ION=[M+H+H2]3+ |             | 3668.15  | 1447.00  | 292.17   | 570.67  |
| 1244 | 373.4  | 1407.72143 |        |                                  |               | ION=[M+H+H]2+  |             | 8033.23  | 368.50   | 607.83   | 596.00  |
| 1245 | 373.4  | 1754.93084 |        |                                  |               | ION=[M+H+H2]3+ |             | 1600.00  | 117.67   | 109.17   | 92.67   |
| 1246 | 373.4  | 1216.66049 |        |                                  |               | ION=[M+H+H]2+  |             | 1879.08  | 94.33    | 0.00     | 369.67  |
| 1247 | 373.59 | 719.57792  |        |                                  |               | ION=[M+H]+     |             | 14.15    | 11.17    | 2203.17  | 0.00    |
| 1248 | 373.65 | 1234.67586 |        |                                  |               | ION=[M+H+H]2+  |             | 1388.92  | 3030.00  | 49.83    | 28.67   |
| 1249 | 373.7  | 892.51119  | 9.549  |                                  |               | ION=[M+H+H]2+  |             | 2463.69  | 24.83    | 0.00     | 479.33  |
| 1250 | 373.91 | 1356.65098 |        |                                  |               | ION=[M+H+H]2+  |             | 75.85    | 3494.67  | 0.00     | 0.00    |
| 1251 | 374.07 | 1799.95375 |        |                                  |               | ION=[M+H+H]2+  |             | 0.00     | 0.00     | 2310.67  | 0.00    |
| 1252 | 374.82 | 1292.68989 |        |                                  |               | ION=[M+H+H]2+  |             | 4861.08  | 244.67   | 1118.17  | 399.67  |
| 1253 | 375.32 | 373.22147  |        |                                  |               | ION=[M+H]+     |             | 3413.08  | 480.33   | 3508.00  | 2562.33 |
| 1254 | 375.51 | 646.34892  |        |                                  |               | ION=[M+H]+     |             | 1851.08  | 54.67    | 83.33    | 403.33  |
| 1255 | 375.65 | 819.87544  |        |                                  |               | ION=[M+H]+     |             | 689.54   | 0.00     | 21.00    | 0.00    |
| 1256 | 375.68 | 1639.76227 |        |                                  |               | ION=[M+H+H]2+  |             | 1250.15  | 0.00     | 0.00     | 0.00    |
| 1257 | 376.17 | 1609.30174 |        |                                  |               | ION=[M+H+H]2+  |             | 20.15    | 1312.50  | 118.17   | 0.00    |
| 1258 | 376.21 | 351.16017  | 13.991 | Adipiplon                        | C18H18FN7     | ION=[M+H]+     | 840486-93-3 | 3215.54  | 750.33   | 973.00   | 2926.33 |
| 1259 | 376.33 | 1610.30971 |        |                                  |               | ION=[M+H+H]2+  |             | 52.46    | 2385.00  | 190.33   | 0.00    |
| 1260 | 376.58 | 1609.80692 |        |                                  |               | ION=[M+H+H]2+  |             | 60.92    | 2410.00  | 393.83   | 40.33   |

|      |        |            |        |                                                                        |            |                |           |          |          |          |          |
|------|--------|------------|--------|------------------------------------------------------------------------|------------|----------------|-----------|----------|----------|----------|----------|
| 1261 | 376.86 | 1417.55866 |        |                                                                        |            | ION=[M+H+H2]3+ |           | 1712.31  | 116.33   | 9.67     | 0.00     |
| 1262 | 376.86 | 1379.62207 |        |                                                                        |            | ION=[M+H+H]2+  |           | 6027.08  | 634.83   | 0.00     | 0.00     |
| 1263 | 377.26 | 1473.7339  |        |                                                                        |            | ION=[M+H+H]2+  |           | 1449.38  | 1426.83  | 1389.00  | 50.00    |
| 1264 | 377.41 | 1676.82416 |        |                                                                        |            | ION=[M+H+H2]3+ |           | 199.85   | 1312.67  | 33.00    | 0.00     |
| 1265 | 377.47 | 1401.60803 |        |                                                                        |            | ION=[M+H+H]2+  |           | 1101.69  | 0.00     | 0.00     | 0.00     |
| 1266 | 377.54 | 1797.937   |        |                                                                        |            | ION=[M+H+H2]3+ |           | 1339.69  | 793.50   | 301.50   | 320.00   |
| 1267 | 377.83 | 739.37664  | 0.854  | 4'-O-( $\alpha$ -D-Glucose<br>glucopiericidin A                        | C37H57NO14 | ION=[M+H]+     |           | 1072.77  | 124.83   | 776.83   | 433.00   |
| 1268 | 377.83 | 1472.62808 |        |                                                                        |            | ION=[M+H+H2]3+ |           | 429.85   | 26.67    | 15.17    | 0.00     |
| 1269 | 378.49 | 2931.48986 |        |                                                                        |            | ION=[M+H+H2]3+ |           | 18.46    | 603.67   | 1355.83  | 0.00     |
| 1270 | 378.5  | 738.19902  |        |                                                                        |            | ION=[M+H+H]2+  |           | 2557.23  | 2590.00  | 844.50   | 42.67    |
| 1271 | 379.26 | 1478.75304 |        |                                                                        |            | ION=[M+H+H]2+  |           | 448.92   | 62.17    | 35.17    | 0.00     |
| 1272 | 379.93 | 654.25604  |        |                                                                        |            | ION=[M+H]+     |           | 22794.77 | 20586.00 | 15431.17 | 5066.67  |
| 1273 | 380.03 | 539.22375  |        |                                                                        |            | ION=[M+H+H]2+  |           | 1653.69  | 330.67   | 6281.00  | 249.00   |
| 1274 | 381.24 | 683.01383  |        |                                                                        |            | ION=[M+H]+     |           | 746.62   | 430.33   | 0.00     | 40.00    |
| 1275 | 381.32 | 683.34402  |        |                                                                        |            | ION=[M+H]+     |           | 1562.62  | 411.50   | 191.67   | 0.00     |
| 1276 | 381.82 | 1337.68641 |        |                                                                        |            | ION=[M+H+H]2+  |           | 254.31   | 1420.17  | 249.33   | 32.67    |
| 1277 | 381.95 | 1780.83822 |        |                                                                        |            | ION=[M+H+H2]3+ |           | 1193.69  | 33.83    | 0.00     | 1695.00  |
| 1278 | 381.95 | 1780.85801 |        |                                                                        |            | ION=[M+H+H]2+  |           | 906.15   | 41.00    | 159.50   | 1553.33  |
| 1279 | 382.47 | 238.12158  | 12.218 | 7-(3-butanonyl)-6,6-dimethyl-2-<br>cyclohex-4-ene-2-carboxylic<br>acid | C13H18O4   | ION=[M+H]+     |           | 2170.15  | 203.50   | 200.50   | 363.33   |
| 1280 | 382.57 | 736.86726  |        |                                                                        |            | ION=[M+H]+     |           | 17.23    | 439.00   | 354.50   | 0.00     |
| 1281 | 382.66 | 923.59689  |        |                                                                        |            | ION=[M+H+H]2+  |           | 17.85    | 1657.83  | 6.00     | 0.00     |
| 1282 | 382.84 | 729.624    |        |                                                                        |            | ION=[M+H]+     |           | 1129.08  | 585.00   | 0.00     | 40.00    |
| 1283 | 383.1  | 746.38556  |        |                                                                        |            | ION=[M+H]+     |           | 1138.15  | 156.83   | 5805.17  | 53.00    |
| 1284 | 383.16 | 746.18599  |        |                                                                        |            | ION=[M+H]+     |           | 1214.31  | 189.50   | 6907.00  | 142.67   |
| 1285 | 383.19 | 499.33942  |        |                                                                        |            | ION=[M+H]+     |           | 2123.69  | 451.33   | 497.83   | 1525.67  |
| 1286 | 383.31 | 745.98748  |        |                                                                        |            | ION=[M+H]+     |           | 1024.77  | 161.83   | 6371.33  | 0.00     |
| 1287 | 383.31 | 745.78781  |        |                                                                        |            | ION=[M+H]+     |           | 595.69   | 75.83    | 3517.00  | 0.00     |
| 1288 | 383.82 | 1515.79073 |        |                                                                        |            | ION=[M+H+H]2+  |           | 3133.85  | 815.83   | 24.17    | 27.67    |
| 1289 | 383.82 | 1458.739   |        |                                                                        |            | ION=[M+H+H]2+  |           | 1383.85  | 812.83   | 211.17   | 111.67   |
| 1290 | 384.43 | 978.49885  |        |                                                                        |            | ION=[M+H+H]2+  |           | 1463.85  | 391.17   | 112.17   | 924.33   |
| 1291 | 384.68 | 1516.29591 |        |                                                                        |            | ION=[M+H+H]2+  |           | 4306.31  | 1290.83  | 61.17    | 0.00     |
| 1292 | 384.8  | 1516.7954  |        |                                                                        |            | ION=[M+H+H]2+  |           | 3684.31  | 1384.00  | 312.67   | 236.67   |
| 1293 | 385.21 | 746.58738  |        |                                                                        |            | ION=[M+H]+     |           | 640.15   | 25.50    | 3282.33  | 20.67    |
| 1294 | 385.56 | 1685.75294 |        |                                                                        |            | ION=[M+H+H]2+  |           | 0.00     | 2017.33  | 41.17    | 0.00     |
| 1295 | 385.56 | 1716.67239 |        |                                                                        |            | ION=[M+H+H2]3+ |           | 0.00     | 1952.67  | 0.00     | 0.00     |
| 1296 | 385.83 | 1663.7716  |        |                                                                        |            | ION=[M+H+H]2+  |           | 0.00     | 9236.83  | 325.83   | 0.00     |
| 1297 | 386.21 | 1701.70517 |        |                                                                        |            | ION=[M+H+H2]3+ |           | 0.00     | 3897.50  | 64.67    | 0.00     |
| 1298 | 386.37 | 593.308    |        |                                                                        |            | ION=[M+H]+     |           | 2859.54  | 2696.17  | 385.17   | 1320.33  |
| 1299 | 386.39 | 731.77875  |        |                                                                        |            | ION=[M+H]+     |           | 2442.00  | 202.83   | 703.00   | 0.00     |
| 1300 | 386.39 | 1255.62966 |        |                                                                        |            | ION=[M+H+H]2+  |           | 1313.38  | 13.67    | 147.83   | 33.33    |
| 1301 | 386.5  | 494.2172   |        |                                                                        |            | ION=[M+H]+     |           | 3799.23  | 926.33   | 1193.67  | 1072.00  |
| 1302 | 386.77 | 425.22554  |        |                                                                        |            | ION=[M+H]+     |           | 908.00   | 2184.67  | 2599.67  | 2534.00  |
| 1303 | 387.13 | 1306.70769 |        |                                                                        |            | ION=[M+H+H]2+  |           | 3118.92  | 27.33    | 370.00   | 53.33    |
| 1304 | 387.17 | 1967.98207 |        |                                                                        |            | ION=[M+H+H2]3+ |           | 63.69    | 10052.17 | 215.83   | 81.67    |
| 1305 | 388.16 | 377.25685  |        |                                                                        |            | ION=[M+H]+     |           | 0.00     | 2078.83  | 45.83    | 0.00     |
| 1306 | 388.2  | 732.37857  |        |                                                                        |            | ION=[M+H]+     |           | 1649.08  | 142.17   | 565.83   | 158.33   |
| 1307 | 389.12 | 218.0713   |        |                                                                        |            | ION=[M+H]+     |           | 2383.54  | 2710.33  | 860.33   | 965.33   |
| 1308 | 389.29 | 1227.57394 |        |                                                                        |            | ION=[M+H+H]2+  |           | 1017.23  | 0.00     | 16.50    | 0.00     |
| 1309 | 389.5  | 1332.67764 |        |                                                                        |            | ION=[M+H+H]2+  |           | 231.69   | 347.83   | 4398.83  | 234.00   |
| 1310 | 389.8  | 1066.40446 |        |                                                                        |            | ION=[M+H+H2]3+ |           | 1090.15  | 72.17    | 9.17     | 27.33    |
| 1311 | 389.83 | 1666.35062 |        |                                                                        |            | ION=[M+H+H]2+  |           | 440.31   | 2301.17  | 93.67    | 0.00     |
| 1312 | 390.04 | 1028.46063 |        |                                                                        |            | ION=[M+H+H]2+  |           | 3900.31  | 242.50   | 0.00     | 0.00     |
| 1313 | 390.35 | 1666.85033 |        |                                                                        |            | ION=[M+H+H]2+  |           | 406.46   | 2100.00  | 389.83   | 94.67    |
| 1314 | 390.43 | 1028.47751 |        |                                                                        |            | ION=[M+H]+     |           | 1193.85  | 0.00     | 17.83    | 16.33    |
| 1315 | 390.62 | 166.07695  | 6.544  | Diisopropylphosphono group                                             | C6H15O3P   | ION=[M+H]+     | 1809-20-7 | 3324.77  | 1449.00  | 1603.33  | 4560.00  |
| 1316 | 390.73 | 3062.53164 |        |                                                                        |            | ION=[M+H+H2]3+ |           | 3427.85  | 4339.50  | 2293.00  | 38.67    |
| 1317 | 391.02 | 1663.86972 |        |                                                                        |            | ION=[M+H+H]2+  |           | 866.92   | 15.83    | 0.00     | 0.00     |
| 1318 | 391.05 | 358.16297  | 17.512 | Aurantionide B                                                         | C18H22N4O4 | ION=[M+H]+     |           | 917.08   | 1558.83  | 2445.00  | 4592.67  |
| 1319 | 391.17 | 389.09132  |        |                                                                        |            | ION=[M+H]+     |           | 558.00   | 1149.33  | 1466.50  | 4236.33  |
| 1320 | 391.29 | 2417.19456 |        |                                                                        |            | ION=[M+H+H2]3+ |           | 1635.85  | 32.50    | 0.00     | 0.00     |
| 1321 | 391.42 | 358.18436  |        |                                                                        |            | ION=[M+H]+     |           | 0.00     | 119.00   | 0.00     | 8241.67  |
| 1322 | 391.44 | 1664.36814 |        |                                                                        |            | ION=[M+H+H]2+  |           | 1121.23  | 0.00     | 30.17    | 0.00     |
| 1323 | 391.45 | 353.20521  |        |                                                                        |            | ION=[M+H]+     |           | 1079.38  | 2049.17  | 2704.67  | 5668.00  |
| 1324 | 391.59 | 2593.29761 |        |                                                                        |            | ION=[M+H+H2]3+ |           | 100.00   | 4671.67  | 200.33   | 153.00   |
| 1325 | 392.24 | 1154.66265 |        |                                                                        |            | ION=[M+H+H]2+  |           | 1003.54  | 109.00   | 211.50   | 5089.67  |
| 1326 | 392.27 | 414.11843  |        |                                                                        |            | ION=[M+H]+     |           | 1623.08  | 0.00     | 1939.00  | 0.00     |
| 1327 | 392.32 | 1664.86698 |        |                                                                        |            | ION=[M+H+H]2+  |           | 1269.85  | 182.83   | 242.67   | 64.33    |
| 1328 | 392.83 | 2826.34418 |        |                                                                        |            | ION=[M+H+H2]3+ |           | 0.00     | 1792.83  | 192.33   | 0.00     |
| 1329 | 394.74 | 737.17102  |        |                                                                        |            | ION=[M+H+H]2+  |           | 26974.77 | 18623.00 | 24479.50 | 19186.00 |
| 1330 | 394.74 | 341.62653  |        |                                                                        |            | ION=[M+H]+     |           | 0.00     | 0.00     | 430.17   | 4168.33  |
| 1331 | 394.75 | 1368.53433 |        |                                                                        |            | ION=[M+H]+     |           | 8124.46  | 872.00   | 4181.33  | 4055.67  |
| 1332 | 394.8  | 684.25771  |        |                                                                        |            | ION=[M+H+H]2+  |           | 8844.15  | 5239.83  | 8431.50  | 7485.67  |
| 1333 | 394.93 | 1421.43773 |        |                                                                        |            | ION=[M+H+H]2+  |           | 13857.54 | 7300.33  | 13763.83 | 9634.33  |

|      |        |            |        |                                                                                |             |  |               |            |          |          |          |          |
|------|--------|------------|--------|--------------------------------------------------------------------------------|-------------|--|---------------|------------|----------|----------|----------|----------|
| 1334 | 395.11 | 722.20691  |        |                                                                                |             |  | ION=[M+H+H]2+ |            | 20596.00 | 19672.83 | 27094.83 | 1862.67  |
| 1335 | 395.13 | 1406.47293 |        |                                                                                |             |  | ION=[M+H+H]2+ |            | 4324.15  | 3842.50  | 6839.50  | 206.33   |
| 1336 | 395.14 | 1369.03423 |        |                                                                                |             |  | ION=[M+H]+    |            | 3407.54  | 580.33   | 1059.67  | 1269.33  |
| 1337 | 395.14 | 728.22575  |        |                                                                                |             |  | ION=[M+H+H]2+ |            | 1827.38  | 1735.33  | 2146.67  | 326.00   |
| 1338 | 395.14 | 1053.35887 |        |                                                                                |             |  | ION=[M+H]+    |            | 1270.31  | 250.00   | 1792.50  | 1463.67  |
| 1339 | 395.15 | 683.25238  |        |                                                                                |             |  | ION=[M+H+H]2+ |            | 12041.38 | 6651.00  | 10620.00 | 5069.00  |
| 1340 | 395.44 | 1407.4778  |        |                                                                                |             |  | ION=[M+H+H]2+ |            | 3336.92  | 2781.67  | 5039.83  | 200.00   |
| 1341 | 396.45 | 1498.78871 |        |                                                                                |             |  | ION=[M+H+H]2+ |            | 2414.62  | 102.17   | 0.00     | 173.00   |
| 1342 | 397.1  | 335.15865  | 14.194 | Riboprine                                                                      | C15H21N5O4  |  | ION=[M+H]+    | 7724-76-7  | 2557.08  | 496.17   | 336.67   | 1203.67  |
| 1343 | 398.76 | 1715.88873 |        |                                                                                |             |  | ION=[M+H+H]2+ |            | 1488.15  | 100.33   | 599.67   | 0.00     |
| 1344 | 399.34 | 1500.78066 |        |                                                                                |             |  | ION=[M+H+H]2+ |            | 202.00   | 60.17    | 4311.83  | 57.33    |
| 1345 | 401.02 | 1595.84247 |        |                                                                                |             |  | ION=[M+H+H]2+ |            | 7194.62  | 197.17   | 602.67   | 0.00     |
| 1346 | 402.5  | 622.26873  |        |                                                                                |             |  | ION=[M+H]+    |            | 26.15    | 3743.17  | 0.00     | 0.00     |
| 1347 | 402.56 | 303.11152  | 5.384  | 8-[(2,5-dimethoxyphenyl)methyl]-2-fluoro-9h-purin-6-amine                      | C14H14FN5O2 |  | ION=[M+H]+    |            | 0.00     | 44503.67 | 65.67    | 0.00     |
| 1348 | 402.77 | 320.13736  | 8.045  | Z-ala-pro-oh                                                                   | C16H20N2O5  |  | ION=[M+H]+    | 21027-01-0 | 143.23   | 22689.00 | 49.00    | 76.33    |
| 1349 | 404.12 | 939.79552  |        |                                                                                |             |  | ION=[M+H]+    |            | 80.77    | 1234.83  | 167.67   | 47.67    |
| 1350 | 404.59 | 235.10721  | 8.807  | 1-[(2-amino-9h-purin-6-yl)oxy]-3-methylbutan-2-one                             | C10H13N5O2  |  | ION=[M+H]+    |            | 1848.77  | 528.83   | 456.50   | 3749.67  |
| 1351 | 404.71 | 1339.61652 |        |                                                                                |             |  | ION=[M+H+H]2+ |            | 7625.54  | 0.00     | 11.00    | 0.00     |
| 1352 | 405.21 | 158.05861  | 13.682 | Gabosine H                                                                     | C7H10O4     |  | ION=[M+H]+    |            | 1662.00  | 682.67   | 565.83   | 3261.00  |
| 1353 | 405.71 | 117.07812  | 2.101  | L(+)-norvaline   L-norvaline                                                   | C5H11NO2    |  | ION=[M+H]+    |            | 720.92   | 255.50   | 22323.83 | 309.67   |
| 1354 | 405.76 | 566.32908  |        |                                                                                |             |  | ION=[M+H]+    |            | 0.00     | 0.00     | 1925.33  | 0.00     |
| 1355 | 406.16 | 330.17881  | 17.217 | L-n(omega)-nitroarginine-(4r)-amino-l-proline amide                            | C11H22N8O4  |  | ION=[M+H]+    |            | 770.15   | 41.50    | 11487.17 | 225.67   |
| 1356 | 406.19 | 1595.33224 |        |                                                                                |             |  | ION=[M+H+H]2+ |            | 1166.00  | 13.83    | 0.00     | 56.67    |
| 1357 | 406.39 | 393.25151  |        |                                                                                |             |  | ION=[M+H]+    |            | 176.77   | 3238.17  | 7.33     | 46.33    |
| 1358 | 406.59 | 1663.81445 |        |                                                                                |             |  | ION=[M+H+H]2+ |            | 1208.92  | 194.17   | 0.00     | 49.67    |
| 1359 | 406.86 | 1298.62845 |        |                                                                                |             |  | ION=[M+H+H]2+ |            | 163.69   | 3271.50  | 120.50   | 50.33    |
| 1360 | 407.03 | 1141.5599  |        |                                                                                |             |  | ION=[M+H+H]2+ |            | 2438.92  | 479.50   | 410.83   | 0.00     |
| 1361 | 407.43 | 2081.06951 |        |                                                                                |             |  | ION=[M+H+H]2+ |            | 1017.38  | 96.17    | 62.00    | 33.00    |
| 1362 | 407.81 | 1806.26765 |        |                                                                                |             |  | ION=[M+H+H]2+ |            | 0.00     | 24.17    | 1076.50  | 55.67    |
| 1363 | 408.32 | 693.68912  |        |                                                                                |             |  | ION=[M+H]+    |            | 429.85   | 40.00    | 0.00     | 21.33    |
| 1364 | 408.93 | 1516.77047 |        |                                                                                |             |  | ION=[M+H+H]2+ |            | 333.23   | 316.83   | 451.50   | 4000.00  |
| 1365 | 409.31 | 2803.39167 |        |                                                                                |             |  | ION=[M+H+H]2+ |            | 221.85   | 1382.50  | 84.00    | 33.00    |
| 1366 | 411.01 | 180.09116  |        |                                                                                |             |  | ION=[M+H]+    |            | 747.69   | 2312.17  | 544.67   | 750.33   |
| 1367 | 413.31 | 306.12334  |        |                                                                                |             |  | ION=[M+H]+    |            | 145.85   | 1957.33  | 194.33   | 102.67   |
| 1368 | 413.5  | 248.11662  |        |                                                                                |             |  | ION=[M+H]+    |            | 2827.85  | 1594.50  | 1435.33  | 1664.33  |
| 1369 | 413.65 | 499.196    |        |                                                                                |             |  | ION=[M+H]+    |            | 193.23   | 2962.17  | 136.33   | 38.67    |
| 1370 | 414.33 | 1135.57055 |        |                                                                                |             |  | ION=[M+H+H]2+ |            | 1610.92  | 52.00    | 0.00     | 59.00    |
| 1371 | 414.36 | 1320.16179 |        |                                                                                |             |  | ION=[M+H+H]2+ |            | 66.77    | 2193.67  | 82.67    | 24.33    |
| 1372 | 414.37 | 2639.33413 |        |                                                                                |             |  | ION=[M+H+H]2+ |            | 148.62   | 8062.83  | 331.83   | 30.00    |
| 1373 | 414.48 | 1319.65985 |        |                                                                                |             |  | ION=[M+H+H]2+ |            | 25.38    | 1609.50  | 0.00     | 29.67    |
| 1374 | 414.56 | 507.1654   |        |                                                                                |             |  | ION=[M+H]+    |            | 2320.46  | 1300.00  | 643.33   | 2927.33  |
| 1375 | 414.69 | 301.01388  |        |                                                                                |             |  | ION=[M+H]+    |            | 2200.31  | 2168.50  | 1536.00  | 3226.33  |
| 1376 | 415.63 | 2617.36138 |        |                                                                                |             |  | ION=[M+H+H]2+ |            | 1245.54  | 257.50   | 58.83    | 0.00     |
| 1377 | 417.7  | 168.11578  | 6.089  | 2-(2-hydroxy-cyclopentyl)-pent-4-ene                                           | C10H16O2    |  | ION=[M+H]+    |            | 2164.77  | 840.00   | 1666.83  | 12429.00 |
| 1378 | 418.18 | 1214.68045 |        |                                                                                |             |  | ION=[M+H+H]2+ |            | 1897.38  | 72.17    | 81.17    | 4035.00  |
| 1379 | 418.58 | 726.35427  |        |                                                                                |             |  | ION=[M+H]+    |            | 1417.69  | 230.50   | 254.33   | 382.00   |
| 1380 | 419.83 | 1398.51263 |        |                                                                                |             |  | ION=[M+H]+    |            | 22.31    | 1149.33  | 0.00     | 0.00     |
| 1381 | 420.03 | 1553.59874 |        |                                                                                |             |  | ION=[M+H+H]2+ |            | 12.31    | 25.00    | 2700.50  | 81.00    |
| 1382 | 420.03 | 776.89959  |        |                                                                                |             |  | ION=[M+H]+    |            | 59.23    | 168.00   | 2859.00  | 46.00    |
| 1383 | 420.18 | 874.46714  |        |                                                                                |             |  | ION=[M+H+H]2+ |            | 0.00     | 22.33    | 14109.33 | 6748.67  |
| 1384 | 420.52 | 1554.00222 |        |                                                                                |             |  | ION=[M+H+H]2+ |            | 102.15   | 0.00     | 2561.00  | 0.00     |
| 1385 | 421.21 | 254.99565  |        |                                                                                |             |  | ION=[M+H]+    |            | 1315.69  | 611.00   | 625.00   | 2259.00  |
| 1386 | 421.28 | 1399.51113 |        |                                                                                |             |  | ION=[M+H]+    |            | 11.69    | 1485.33  | 0.00     | 0.00     |
| 1387 | 421.53 | 1399.50013 |        |                                                                                |             |  | ION=[M+H]+    |            | 0.00     | 1239.00  | 0.00     | 0.00     |
| 1388 | 421.82 | 863.44375  |        |                                                                                |             |  | ION=[M+H]+    |            | 279.38   | 35.17    | 2024.67  | 89.67    |
| 1389 | 421.82 | 863.33437  |        |                                                                                |             |  | ION=[M+H]+    |            | 0.00     | 0.00     | 2821.00  | 41.00    |
| 1390 | 422.47 | 174.09024  | 6.168  | Suberic acid                                                                   | C8H14O4     |  | ION=[M+H]+    |            | 92.62    | 5277.33  | 0.00     | 0.00     |
| 1391 | 422.68 | 274.09665  | 13.984 | 4-[(5-oxo-2-phenyl-4,5-dihydro-1,3-oxazol-4-ylidene)methyl]amino]butanoic acid | C14H14N2O4  |  | ION=[M+H]+    |            | 3254.92  | 1941.83  | 2021.83  | 3032.00  |
| 1392 | 423.17 | 1321.64113 |        |                                                                                |             |  | ION=[M+H+H]2+ |            | 1679.54  | 199.50   | 76.50    | 24.67    |
| 1393 | 423.47 | 1398.48921 |        |                                                                                |             |  | ION=[M+H+H]2+ |            | 98.92    | 5453.50  | 0.00     | 40.33    |
| 1394 | 423.58 | 1451.4018  |        |                                                                                |             |  | ION=[M+H+H]2+ |            | 46.15    | 2745.17  | 0.00     | 0.00     |
| 1395 | 424.14 | 1224.41291 |        |                                                                                |             |  | ION=[M+H]+    |            | 43.54    | 2574.33  | 0.00     | 0.00     |
| 1396 | 424.15 | 265.10039  |        |                                                                                |             |  | ION=[M+H]+    |            | 546.46   | 4792.17  | 76.33    | 879.00   |
| 1397 | 424.3  | 1394.67795 |        |                                                                                |             |  | ION=[M+H+H]2+ |            | 1296.46  | 197.50   | 95.17    | 67.67    |
| 1398 | 424.34 | 947.37079  |        |                                                                                |             |  | ION=[M+H+H]2+ |            | 4482.15  | 3183.67  | 0.00     | 33.67    |
| 1399 | 424.62 | 544.20307  |        |                                                                                |             |  | ION=[M+H]+    |            | 0.00     | 1266.83  | 0.00     | 0.00     |
| 1400 | 424.62 | 142.06347  | 5.102  | Glycidyl methacrylate                                                          | C7H10O3     |  | ION=[M+H]+    | 106-91-2   | 77.23    | 1246.50  | 104.17   | 97.00    |
| 1401 | 424.89 | 854.2987   |        |                                                                                |             |  | ION=[M+H]+    |            | 0.00     | 1518.33  | 179.67   | 27.67    |
| 1402 | 426.77 | 1630.87636 |        |                                                                                |             |  | ION=[M+H+H]2+ |            | 30.62    | 1463.33  | 79.17    | 336.33   |
| 1403 | 427.45 | 281.09522  |        |                                                                                |             |  | ION=[M+H]+    |            | 3694.31  | 2988.50  | 1205.33  | 9652.33  |



|      |        |            |        |                                                              |            |                |             |          |          |         |         |
|------|--------|------------|--------|--------------------------------------------------------------|------------|----------------|-------------|----------|----------|---------|---------|
| 1404 | 428.23 | 963.36596  |        |                                                              |            | ION=[M+H+H]2+  |             | 25382.00 | 17522.17 | 25.17   | 21.33   |
| 1405 | 428.27 | 468.27036  |        |                                                              |            | ION=[M+H]+     |             | 3507.08  | 1777.00  | 1318.33 | 468.33  |
| 1406 | 428.28 | 1532.74416 |        |                                                              |            | ION=[M+H+H]2+  |             | 391.08   | 1802.67  | 434.00  | 39.67   |
| 1407 | 428.82 | 537.28358  |        |                                                              |            | ION=[M+H+H]2+  |             | 7140.77  | 1158.33  | 4687.17 | 7108.00 |
| 1408 | 428.87 | 3096.56099 |        |                                                              |            | ION=[M+H+H2]3+ |             | 1675.08  | 693.33   | 65.83   | 0.00    |
| 1409 | 428.94 | 1532.23838 |        |                                                              |            | ION=[M+H+H]2+  |             | 345.23   | 1863.17  | 390.00  | 0.00    |
| 1410 | 428.99 | 443.25331  |        |                                                              |            | ION=[M+H]+     |             | 0.00     | 2400.83  | 0.00    | 0.00    |
| 1411 | 429.38 | 196.11193  |        |                                                              |            | ION=[M+H]+     |             | 6503.08  | 5507.00  | 1972.83 | 2067.67 |
| 1412 | 429.41 | 1398.5036  |        |                                                              |            | ION=[M+H]+     |             | 14.46    | 1539.00  | 0.00    | 0.00    |
| 1413 | 429.43 | 1548.77064 |        |                                                              |            | ION=[M+H+H]2+  |             | 1144.46  | 780.00   | 354.33  | 52.67   |
| 1414 | 429.85 | 519.27377  |        |                                                              |            | ION=[M+H+H]2+  |             | 2311.69  | 480.50   | 1872.67 | 2618.67 |
| 1415 | 429.96 | 274.19371  | 14.678 | Empenthrin                                                   | C18H26O2   | ION=[M+H]+     | 54406-48-3  | 2899.69  | 460.67   | 2128.33 | 3236.00 |
| 1416 | 430.13 | 555.29857  |        |                                                              |            | ION=[M+H]+     |             | 2794.77  | 517.17   | 1700.83 | 3011.00 |
| 1417 | 430.75 | 1469.23568 |        |                                                              |            | ION=[M+H+H]2+  |             | 2347.69  | 262.17   | 30.17   | 25.67   |
| 1418 | 431.09 | 306.1587   | 19.009 | Ruxolitinib                                                  | C17H18N6   | ION=[M+H]+     |             | 48.77    | 5.67     | 2088.17 | 45.00   |
| 1419 | 431.1  | 250.09668  |        |                                                              |            | ION=[M+H]+     |             | 1788.62  | 209.33   | 750.67  | 2354.67 |
| 1420 | 431.51 | 700.26265  |        |                                                              |            | ION=[M+H]+     |             | 8116.46  | 2656.00  | 3710.50 | 5696.00 |
| 1421 | 431.93 | 1469.73707 |        |                                                              |            | ION=[M+H+H]2+  |             | 3528.31  | 475.50   | 401.17  | 64.00   |
| 1422 | 432.36 | 2938.48852 |        |                                                              |            | ION=[M+H+H2]3+ |             | 8085.38  | 567.67   | 474.67  | 0.00    |
| 1423 | 432.4  | 701.26401  |        |                                                              |            | ION=[M+H]+     |             | 3458.92  | 941.50   | 1641.00 | 2304.33 |
| 1424 | 432.67 | 1470.23589 |        |                                                              |            | ION=[M+H+H]2+  |             | 2985.23  | 303.83   | 227.83  | 0.00    |
| 1425 | 433    | 181.07603  |        |                                                              |            | ION=[M+H]+     |             | 1681.08  | 1809.50  | 408.00  | 638.67  |
| 1426 | 433.31 | 1242.6102  |        |                                                              |            | ION=[M+H+H]2+  |             | 4964.92  | 899.33   | 318.33  | 0.00    |
| 1427 | 433.5  | 182.07363  | 8.364  | 3-Hydroxy-5-(hydroxymethyl)-2-methylisonicotinaldehyde oxime | C8H10N2O3  | ION=[M+H]+     |             | 3915.85  | 906.33   | 1817.33 | 5097.33 |
| 1428 | 433.58 | 1484.78619 |        |                                                              |            | ION=[M+H+H2]3+ |             | 0.00     | 0.00     | 5041.83 | 0.00    |
| 1429 | 434.04 | 804.41511  |        |                                                              |            | ION=[M+H]+     |             | 1708.15  | 301.00   | 607.67  | 0.00    |
| 1430 | 434.2  | 224.14103  | 10.917 | 12?-Deoxy-deoxysaxitoxin                                     | C9H16N6O   | ION=[M+H]+     |             | 4364.00  | 3768.50  | 8234.67 | 5399.00 |
| 1431 | 435.02 | 604.25491  |        |                                                              |            | ION=[M+H+H]2+  |             | 1775.38  | 42971.83 | 2144.00 | 1010.00 |
| 1432 | 435.3  | 419.05625  |        |                                                              |            | ION=[M+H]+     |             | 98.62    | 2813.83  | 157.00  | 0.00    |
| 1433 | 436.46 | 303.2048   |        |                                                              |            | ION=[M+H]+     |             | 0.00     | 0.00     | 58.33   | 8169.67 |
| 1434 | 436.77 | 233.14287  | 9.187  | Methylphenidate                                              | C14H19NO2  | ION=[M+H]+     |             | 100.62   | 1876.67  | 90.17   | 266.00  |
| 1435 | 437.18 | 882.44404  |        |                                                              |            | ION=[M+H+H]2+  |             | 0.00     | 27.33    | 5378.00 | 0.00    |
| 1436 | 438.94 | 795.41283  |        |                                                              |            | ION=[M+H+H]2+  |             | 10.92    | 0.00     | 4071.00 | 0.00    |
| 1437 | 439.31 | 268.64208  |        |                                                              |            | ION=[M+H]+     |             | 5151.38  | 883.83   | 3236.83 | 4279.00 |
| 1438 | 440.32 | 375.12607  |        |                                                              |            | ION=[M+H]+     |             | 36.15    | 3118.83  | 15.00   | 0.00    |
| 1439 | 440.94 | 1769.31205 |        |                                                              |            | ION=[M+H+H]2+  |             | 1550.00  | 115.50   | 720.67  | 0.00    |
| 1440 | 442.33 | 2952.49675 |        |                                                              |            | ION=[M+H+H2]3+ |             | 945.08   | 0.00     | 113.50  | 0.00    |
| 1441 | 443.37 | 1356.65285 |        |                                                              |            | ION=[M+H+H]2+  |             | 1690.77  | 218.00   | 134.17  | 75.00   |
| 1442 | 443.49 | 2460.19363 |        |                                                              |            | ION=[M+H+H2]3+ |             | 1758.00  | 85.50    | 31.67   | 0.00    |
| 1443 | 443.72 | 392.18134  |        |                                                              |            | ION=[M+H]+     |             | 696.46   | 834.67   | 2037.83 | 239.33  |
| 1444 | 445.48 | 1406.61601 |        |                                                              |            | ION=[M+H+H]2+  |             | 1751.38  | 345.50   | 391.50  | 40.00   |
| 1445 | 446.08 | 1427.68956 |        |                                                              |            | ION=[M+H+H]2+  |             | 3794.46  | 263.50   | 29.83   | 0.00    |
| 1446 | 446.52 | 539.29846  |        |                                                              |            | ION=[M+H+H]2+  |             | 2645.38  | 400.33   | 2327.67 | 2685.67 |
| 1447 | 446.67 | 2689.43039 |        |                                                              |            | ION=[M+H+H2]3+ |             | 1452.00  | 801.50   | 0.00    | 57.00   |
| 1448 | 449.53 | 194.09331  | 10.164 | Nakienone A                                                  | C11H14O3   | ION=[M+H]+     |             | 2113.38  | 1401.00  | 1955.33 | 830.67  |
| 1449 | 450.09 | 2852.50713 |        |                                                              |            | ION=[M+H+H2]3+ |             | 808.31   | 105.17   | 106.33  | 0.00    |
| 1450 | 450.41 | 553.27895  |        |                                                              |            | ION=[M+H+H]2+  |             | 3056.31  | 416.83   | 2273.50 | 3576.00 |
| 1451 | 450.54 | 693.18825  |        |                                                              |            | ION=[M+H]+     |             | 0.00     | 3671.50  | 0.00    | 0.00    |
| 1452 | 450.75 | 615.17228  |        |                                                              |            | ION=[M+H]+     |             | 12122.62 | 2226.83  | 1183.33 | 5185.00 |
| 1453 | 451.33 | 182.13157  | 6.304  | (2Z,4E)-3-methyl-2,4-decadienoic acid                        | C11H18O2   | ION=[M+H]+     |             | 329.54   | 5102.83  | 0.00    | 0.00    |
| 1454 | 451.73 | 2892.34247 |        |                                                              |            | ION=[M+H+H2]3+ |             | 1522.92  | 1876.00  | 903.33  | 0.00    |
| 1455 | 451.79 | 964.44941  |        |                                                              |            | ION=[M+H]+     |             | 1692.92  | 2147.83  | 1249.67 | 0.00    |
| 1456 | 451.79 | 964.78464  |        |                                                              |            | ION=[M+H]+     |             | 1430.62  | 1903.00  | 956.83  | 20.00   |
| 1457 | 452.39 | 606.23446  |        |                                                              |            | ION=[M+H]+     |             | 9674.15  | 3286.83  | 4609.00 | 8475.00 |
| 1458 | 453.14 | 1214.58728 |        |                                                              |            | ION=[M+H]+     |             | 566.92   | 0.00     | 0.00    | 20.67   |
| 1459 | 454.06 | 359.00899  |        |                                                              |            | ION=[M+H]+     |             | 1581.85  | 2465.33  | 10.67   | 47.00   |
| 1460 | 455.01 | 242.08113  | 0.977  | S-8510                                                       | C12H10N4O2 | ION=[M+H]+     |             | 47328.77 | 73176.00 | 1479.50 | 3156.33 |
| 1461 | 455.88 | 182.09567  | 8.623  | Mephenesin                                                   | C10H14O3   | ION=[M+H]+     | 59-47-2     | 504.77   | 328.00   | 2668.33 | 6032.33 |
| 1462 | 456.02 | 279.07954  |        |                                                              |            | ION=[M+H]+     |             | 7417.23  | 12208.00 | 998.83  | 7769.67 |
| 1463 | 456.12 | 1556.73431 |        |                                                              |            | ION=[M+H+H]2+  |             | 2997.85  | 481.83   | 0.00    | 0.00    |
| 1464 | 457.26 | 1698.29397 |        |                                                              |            | ION=[M+H+H]2+  |             | 1137.23  | 54.33    | 82.83   | 0.00    |
| 1465 | 458.69 | 263.22533  |        |                                                              |            | ION=[M+H]+     |             | 5287.85  | 4736.67  | 4745.50 | 9171.33 |
| 1466 | 461.48 | 1940.91742 |        |                                                              |            | ION=[M+H+H]2+  |             | 2236.31  | 19.00    | 47.67   | 0.00    |
| 1467 | 462.14 | 1812.85632 |        |                                                              |            | ION=[M+H+H]2+  |             | 2270.31  | 1266.00  | 528.33  | 62.33   |
| 1468 | 463.76 | 805.3338   |        |                                                              |            | ION=[M+H]+     |             | 6754.31  | 5156.83  | 536.33  | 7292.33 |
| 1469 | 464.21 | 231.12704  | 7.265  | Fenfluramine                                                 | C12H16F3N  | ION=[M+H]+     | 458-24-2    | 421.69   | 5774.00  | 496.83  | 221.00  |
| 1470 | 466.77 | 265.1003   | 15.933 | Dipraglurant                                                 | C16H12FN3  | ION=[M+H]+     | 872363-17-2 | 9444.77  | 5323.33  | 17.00   | 2943.00 |
| 1471 | 467.43 | 209.10699  | 11.072 | 11-Carboxyanatoxin-a                                         | C11H15NO3  | ION=[M+H]+     |             | 1121.54  | 3773.17  | 253.50  | 333.00  |
| 1472 | 468.08 | 276.14654  |        |                                                              |            | ION=[M+H]+     |             | 224.46   | 3761.00  | 362.50  | 242.67  |
| 1473 | 468.5  | 238.15741  | 17.728 | Saccharomonopyrone B                                         | C14H22O3   | ION=[M+H]+     |             | 469.85   | 2021.83  | 321.33  | 107.33  |
| 1474 | 470.39 | 721.2731   |        |                                                              |            | ION=[M+H+H]2+  |             | 8.62     | 2318.50  | 15.83   | 0.00    |
| 1475 | 471.7  | 196.11206  |        |                                                              |            | ION=[M+H]+     |             | 2697.85  | 6186.50  | 987.17  | 2280.00 |
| 1476 | 472.45 | 2125.25445 |        |                                                              |            | ION=[M+H+H2]3+ |             | 514.15   | 985.83   | 1875.17 | 339.67  |

|      |        |            |        |                                                                                                                               |              |                           |            |          |         |          |         |
|------|--------|------------|--------|-------------------------------------------------------------------------------------------------------------------------------|--------------|---------------------------|------------|----------|---------|----------|---------|
| 1477 | 478.9  | 443.25316  |        |                                                                                                                               |              | ION=[M+H] <sup>+</sup>    | 16.15      | 1759.83  | 0.00    | 49.00    |         |
| 1478 | 478.9  | 548.26299  |        |                                                                                                                               |              | ION=[M+H+H] <sup>2+</sup> | 0.00       | 0.00     | 417.83  | 0.00     |         |
| 1479 | 479.05 | 1621.29759 |        |                                                                                                                               |              | ION=[M+H+H] <sup>2+</sup> | 63.08      | 2106.67  | 31.17   | 0.00     |         |
| 1480 | 479.13 | 1621.79732 |        |                                                                                                                               |              | ION=[M+H+H] <sup>2+</sup> | 117.69     | 3134.50  | 176.50  | 206.67   |         |
| 1481 | 482.1  | 377.25652  | 13.496 | 3-((3E,6E,8E,10R,11R,12E)-11-hydroxy-4,8,10,12-tetramethyltetradeca-3,6,8,12-tetraenamido)butanoic acid                       | C22H35NO4    | ION=[M+H] <sup>+</sup>    | 6563.23    | 2605.50  | 1615.83 | 3975.00  |         |
| 1482 | 482.25 | 896.38786  |        |                                                                                                                               |              | ION=[M+H] <sup>+</sup>    | 2044.92    | 162.17   | 0.00    | 0.00     |         |
| 1483 | 482.25 | 896.04997  |        |                                                                                                                               |              | ION=[M+H] <sup>+</sup>    | 869.08     | 0.00     | 0.00    | 0.00     |         |
| 1484 | 482.25 | 2704.12074 |        |                                                                                                                               |              | ION=[M+H+H] <sup>2+</sup> | 1548.92    | 82.83    | 0.00    | 0.00     |         |
| 1485 | 482.68 | 1325.61684 |        |                                                                                                                               |              | ION=[M+H] <sup>+</sup>    | 2169.85    | 213.50   | 0.00    | 0.00     |         |
| 1486 | 482.84 | 2688.15087 |        |                                                                                                                               |              | ION=[M+H+H] <sup>2+</sup> | 1680.92    | 63.83    | 0.00    | 0.00     |         |
| 1487 | 482.99 | 1326.61092 |        |                                                                                                                               |              | ION=[M+H] <sup>+</sup>    | 1544.92    | 77.33    | 0.00    | 0.00     |         |
| 1488 | 482.99 | 1326.11507 |        |                                                                                                                               |              | ION=[M+H] <sup>+</sup>    | 2779.23    | 149.83   | 0.00    | 51.33    |         |
| 1489 | 483.67 | 1398.49148 |        |                                                                                                                               |              | ION=[M+H+H] <sup>2+</sup> | 192.46     | 4386.67  | 20.83   | 23.00    |         |
| 1490 | 484.46 | 1615.21753 |        |                                                                                                                               |              | ION=[M+H+H] <sup>2+</sup> | 68.15      | 83.00    | 452.67  | 0.00     |         |
| 1491 | 484.61 | 1224.41418 |        |                                                                                                                               |              | ION=[M+H] <sup>+</sup>    | 0.00       | 1688.83  | 0.00    | 0.00     |         |
| 1492 | 484.7  | 174.09048  | 7.238  | Suberic acid                                                                                                                  | C8H14O4      | ION=[M+H] <sup>+</sup>    | 149.23     | 4144.50  | 18.00   | 0.00     |         |
| 1493 | 485.09 | 934.01119  |        |                                                                                                                               |              | ION=[M+H] <sup>+</sup>    | 373.08     | 773.67   | 4258.50 | 438.00   |         |
| 1494 | 485.54 | 867.43697  |        |                                                                                                                               |              | ION=[M+H] <sup>+</sup>    | 290.15     | 911.33   | 2925.17 | 133.33   |         |
| 1495 | 486.05 | 1451.40386 |        |                                                                                                                               |              | ION=[M+H+H] <sup>2+</sup> | 97.85      | 2369.67  | 46.50   | 0.00     |         |
| 1496 | 486.62 | 933.85723  |        |                                                                                                                               |              | ION=[M+H] <sup>+</sup>    | 126.15     | 531.17   | 2886.17 | 82.00    |         |
| 1497 | 487.64 | 867.5809   |        |                                                                                                                               |              | ION=[M+H] <sup>+</sup>    | 249.69     | 748.33   | 2677.00 | 101.67   |         |
| 1498 | 487.71 | 1731.0209  |        |                                                                                                                               |              | ION=[M+H+H] <sup>2+</sup> | 0.00       | 24.00    | 1014.67 | 34.00    |         |
| 1499 | 488.8  | 809.54428  |        |                                                                                                                               |              | ION=[M+H] <sup>+</sup>    | 140.77     | 639.33   | 2462.67 | 0.00     |         |
| 1500 | 491.2  | 483.20021  |        |                                                                                                                               |              | ION=[M+H] <sup>+</sup>    | 28.62      | 4281.17  | 12.17   | 19.33    |         |
| 1501 | 492.45 | 181.07545  | 9.936  | Tyrosin                                                                                                                       | C9H11NO3     | ION=[M+H] <sup>+</sup>    | 1062.31    | 3089.00  | 120.33  | 1797.33  |         |
| 1502 | 496.4  | 867.36668  |        |                                                                                                                               |              | ION=[M+H] <sup>+</sup>    | 362.46     | 885.17   | 3812.83 | 558.00   |         |
| 1503 | 496.66 | 858.47207  | 19.035 | Avermectin B1b                                                                                                                | C47H70O14    | ION=[M+H+H] <sup>2+</sup> | 65195-56-4 | 37.08    | 0.00    | 7690.67  | 1836.00 |
| 1504 | 497    | 858.48317  |        |                                                                                                                               |              | ION=[M+H] <sup>+</sup>    | 11.38      | 0.00     | 3520.33 | 597.67   |         |
| 1505 | 497.43 | 934.16373  |        |                                                                                                                               |              | ION=[M+H] <sup>+</sup>    | 490.00     | 1133.17  | 4431.17 | 620.00   |         |
| 1506 | 498.5  | 1202.62679 |        |                                                                                                                               |              | ION=[M+H+H] <sup>2+</sup> | 17.85      | 2046.83  | 0.00    | 0.00     |         |
| 1507 | 498.6  | 1730.85221 |        |                                                                                                                               |              | ION=[M+H+H] <sup>2+</sup> | 0.00       | 142.50   | 634.33  | 0.00     |         |
| 1508 | 501.13 | 317.13914  |        |                                                                                                                               |              | ION=[M+H] <sup>+</sup>    | 57.69      | 2473.17  | 76.33   | 30.00    |         |
| 1509 | 501.19 | 1240.721   |        |                                                                                                                               |              | ION=[M+H+H] <sup>2+</sup> | 0.00       | 10687.50 | 207.67  | 1791.67  |         |
| 1510 | 502.42 | 1238.70566 |        |                                                                                                                               |              | ION=[M+H+H] <sup>2+</sup> | 24.00      | 8637.17  | 142.83  | 2311.67  |         |
| 1511 | 504    | 1216.64214 |        |                                                                                                                               |              | ION=[M+H+H] <sup>2+</sup> | 0.00       | 4340.17  | 67.67   | 47.33    |         |
| 1512 | 504.44 | 1187.592   |        |                                                                                                                               |              | ION=[M+H+H] <sup>2+</sup> | 0.00       | 9353.83  | 0.00    | 0.00     |         |
| 1513 | 505.09 | 1306.6333  |        |                                                                                                                               |              | ION=[M+H+H] <sup>2+</sup> | 6.62       | 373.67   | 0.00    | 967.67   |         |
| 1514 | 505.63 | 1252.72146 |        |                                                                                                                               |              | ION=[M+H+H] <sup>2+</sup> | 10.77      | 19027.67 | 1649.50 | 45849.33 |         |
| 1515 | 505.64 | 435.54324  |        |                                                                                                                               |              | ION=[M+H] <sup>+</sup>    | 6.62       | 1747.33  | 215.17  | 3327.33  |         |
| 1516 | 505.77 | 512.24346  |        |                                                                                                                               |              | ION=[M+H+H] <sup>2+</sup> | 0.00       | 3133.67  | 1057.50 | 0.00     |         |
| 1517 | 506.3  | 310.1421   | 19.554 | 1,3,4-trihydroxy-5-(3-phenoxypropyl)cyclohexane-1-carboxylic acid                                                             | C16H22O6     | ION=[M+H] <sup>+</sup>    | 412.31     | 516.17   | 2114.17 | 1371.00  |         |
| 1518 | 506.58 | 1254.73741 |        |                                                                                                                               |              | ION=[M+H+H] <sup>2+</sup> | 16.15      | 24870.83 | 3670.00 | 42160.00 |         |
| 1519 | 506.65 | 1250.60342 |        |                                                                                                                               |              | ION=[M+H+H] <sup>2+</sup> | 0.00       | 2667.50  | 82.83   | 62.33    |         |
| 1520 | 507.77 | 261.06884  |        |                                                                                                                               |              | ION=[M+H] <sup>+</sup>    | 2592.15    | 5679.33  | 629.83  | 6953.00  |         |
| 1521 | 508.44 | 1307.63507 |        |                                                                                                                               |              | ION=[M+H+H] <sup>2+</sup> | 12.77      | 2470.00  | 302.17  | 2935.00  |         |
| 1522 | 508.44 | 1292.66856 |        |                                                                                                                               |              | ION=[M+H+H] <sup>2+</sup> | 0.00       | 3748.83  | 676.33  | 291.33   |         |
| 1523 | 508.44 | 1276.71746 |        |                                                                                                                               |              | ION=[M+H+H] <sup>2+</sup> | 24.46      | 2340.67  | 406.50  | 784.00   |         |
| 1524 | 508.44 | 1308.64491 |        |                                                                                                                               |              | ION=[M+H+H] <sup>2+</sup> | 0.00       | 2598.67  | 472.83  | 3929.00  |         |
| 1525 | 508.44 | 1290.66422 |        |                                                                                                                               |              | ION=[M+H+H] <sup>2+</sup> | 290.46     | 3265.00  | 474.50  | 409.33   |         |
| 1526 | 509.1  | 164.12065  |        |                                                                                                                               |              | ION=[M+H] <sup>+</sup>    | 2957.38    | 2707.50  | 261.67  | 268.67   |         |
| 1527 | 510.41 | 1274.70038 |        |                                                                                                                               |              | ION=[M+H+H] <sup>2+</sup> | 0.00       | 2178.17  | 226.50  | 1163.33  |         |
| 1528 | 511.72 | 1268.75133 |        |                                                                                                                               |              | ION=[M+H+H] <sup>2+</sup> | 32.15      | 9257.00  | 1510.67 | 12765.00 |         |
| 1529 | 511.91 | 1266.73866 |        |                                                                                                                               |              | ION=[M+H+H] <sup>2+</sup> | 14.92      | 7876.33  | 639.00  | 16459.67 |         |
| 1530 | 512.13 | 351.93043  |        |                                                                                                                               |              | ION=[M+H+H] <sup>2+</sup> | 7601.23    | 5667.33  | 5070.33 | 5930.00  |         |
| 1531 | 514.04 | 632.28511  |        |                                                                                                                               |              | ION=[M+H+H] <sup>2+</sup> | 0.00       | 0.00     | 0.00    | 918.67   |         |
| 1532 | 516.62 | 400.20804  |        |                                                                                                                               |              | ION=[M+H] <sup>+</sup>    | 725.38     | 1750.50  | 1070.83 | 1557.33  |         |
| 1533 | 517.42 | 1238.74068 |        |                                                                                                                               |              | ION=[M+H+H] <sup>2+</sup> | 18.77      | 5123.17  | 156.83  | 447.00   |         |
| 1534 | 518.06 | 1236.72602 |        |                                                                                                                               |              | ION=[M+H+H] <sup>2+</sup> | 15.38      | 3104.67  | 45.50   | 834.67   |         |
| 1535 | 518.9  | 410.11174  |        |                                                                                                                               |              | ION=[M+H] <sup>+</sup>    | 1655.85    | 447.50   | 364.83  | 829.67   |         |
| 1536 | 519.51 | 2260.24834 |        |                                                                                                                               |              | ION=[M+H+H] <sup>2+</sup> | 126.15     | 1533.83  | 70.00   | 0.00     |         |
| 1537 | 520.03 | 395.25177  |        |                                                                                                                               |              | ION=[M+H] <sup>+</sup>    | 742.46     | 2269.33  | 999.83  | 1641.67  |         |
| 1538 | 522.08 | 1252.75829 |        |                                                                                                                               |              | ION=[M+H+H] <sup>2+</sup> | 28.62      | 9944.83  | 1610.83 | 14928.00 |         |
| 1539 | 522.44 | 1135.68042 |        |                                                                                                                               |              | ION=[M+H+H] <sup>2+</sup> | 0.00       | 980.00   | 24.67   | 3571.33  |         |
| 1540 | 522.49 | 712.26448  |        |                                                                                                                               |              | ION=[M+H] <sup>+</sup>    | 2460.77    | 467.50   | 1194.17 | 1143.00  |         |
| 1541 | 522.89 | 1250.74389 |        |                                                                                                                               |              | ION=[M+H+H] <sup>2+</sup> | 23.85      | 8001.67  | 698.17  | 18019.67 |         |
| 1542 | 524.9  | 324.06512  |        |                                                                                                                               |              | ION=[M+H+H] <sup>2+</sup> | 1182.31    | 290.67   | 667.33  | 0.00     |         |
| 1543 | 525.92 | 431.13764  | 18.484 | 6-(2-amino-6-ethoxy-9h-purin-9-yl)-7-fluoro-7-methyl-2-(propan-2-yloxy)-hexahydro-2??-furo[3,2-d][1,3,2]dioxaphosphinin-2-one | C16H23FN5O6P | ION=[M+H] <sup>+</sup>    | 1276.31    | 2975.67  | 1875.50 | 3374.00  |         |
| 1544 | 526.63 | 315.27763  |        |                                                                                                                               |              | ION=[M+H] <sup>+</sup>    | 0.00       | 15.17    | 0.00    | 3686.67  |         |

|      |        |            |        |                                                                                                 |            |                           |            |          |          |          |           |
|------|--------|------------|--------|-------------------------------------------------------------------------------------------------|------------|---------------------------|------------|----------|----------|----------|-----------|
| 1545 | 529.9  | 252.1373   | 13.797 | (8aR,12S,12aR)-12-Hydroxy-4-methyl-4,5,6,7,8,8a,12,12a-octahydro-2H-3-benzoxecine-2,9(1H)-dione | C14H20O4   | ION=[M+H] <sup>+</sup>    |            | 2243.08  | 1217.00  | 491.83   | 1532.00   |
| 1546 | 530.54 | 1266.77269 |        |                                                                                                 |            | ION=[M+H+H] <sup>2+</sup> |            | 10.92    | 4112.67  | 516.17   | 4580.33   |
| 1547 | 530.58 | 483.20152  |        |                                                                                                 |            | ION=[M+H] <sup>+</sup>    |            | 2488.31  | 2433.00  | 2112.83  | 390.00    |
| 1548 | 530.6  | 338.98136  |        |                                                                                                 |            | ION=[M+H] <sup>+</sup>    |            | 3063.85  | 2274.00  | 1674.67  | 6816.33   |
| 1549 | 530.74 | 162.03248  | 3.352  | 4-hydroxycoumarins                                                                              | C9H6O3     | ION=[M+H] <sup>+</sup>    | 1076-38-6  | 31544.15 | 18197.50 | 14326.00 | 61250.33  |
| 1550 | 530.77 | 459.03583  |        |                                                                                                 |            | ION=[M+H+H] <sup>2+</sup> |            | 843.38   | 207.33   | 130.50   | 2262.00   |
| 1551 | 530.92 | 1264.75735 |        |                                                                                                 |            | ION=[M+H+H] <sup>2+</sup> |            | 0.00     | 2822.50  | 268.17   | 7400.67   |
| 1552 | 530.92 | 310.98623  |        |                                                                                                 |            | ION=[M+H] <sup>+</sup>    |            | 4272.92  | 2870.50  | 2398.50  | 9089.33   |
| 1553 | 531.51 | 702.27095  |        |                                                                                                 |            | ION=[M+H+H] <sup>2+</sup> |            | 859.23   | 1934.17  | 1371.83  | 66.00     |
| 1554 | 532.88 | 388.11936  |        |                                                                                                 |            | ION=[M+H+H] <sup>2+</sup> |            | 0.00     | 1370.33  | 8.83     | 0.00      |
| 1555 | 535.05 | 728.35212  |        |                                                                                                 |            | ION=[M+H+H] <sup>2+</sup> |            | 1752.15  | 134.50   | 63.33    | 84.67     |
| 1556 | 538.69 | 1230.65849 |        |                                                                                                 |            | ION=[M+H+H] <sup>2+</sup> |            | 0.00     | 6025.50  | 250.00   | 0.00      |
| 1557 | 542.44 | 406.26572  |        |                                                                                                 |            | ION=[M+H+H] <sup>2+</sup> |            | 0.00     | 568.83   | 1014.17  | 0.00      |
| 1558 | 543.05 | 1244.67408 |        |                                                                                                 |            | ION=[M+H+H] <sup>2+</sup> |            | 25.08    | 16066.00 | 4914.00  | 0.00      |
| 1559 | 544.19 | 203.13254  | 40.007 | Aphanorphine                                                                                    | C13H17NO   | ION=[M+H] <sup>+</sup>    |            | 8715.08  | 1957.83  | 2498.67  | 5616.33   |
| 1560 | 545.53 | 452.23848  |        |                                                                                                 |            | ION=[M+H+H] <sup>2+</sup> |            | 1592.77  | 36.67    | 119.17   | 0.00      |
| 1561 | 545.97 | 1775.5951  |        |                                                                                                 |            | ION=[M+H+H] <sup>2+</sup> |            | 0.00     | 0.00     | 1833.50  | 85.33     |
| 1562 | 546.49 | 317.27226  | 4.746  | Amorolfine                                                                                      | C21H35NO   | ION=[M+H] <sup>+</sup>    |            | 2347.85  | 2466.00  | 2685.50  | 5258.00   |
| 1563 | 546.5  | 551.28755  | 5.899  | Sinefungin VA                                                                                   | C23H37N9O7 | ION=[M+H] <sup>+</sup>    |            | 0.00     | 0.00     | 5620.50  | 67.33     |
| 1564 | 547.51 | 1775.92514 |        |                                                                                                 |            | ION=[M+H+H] <sup>2+</sup> |            | 13.54    | 26.00    | 4099.00  | 258.67    |
| 1565 | 547.91 | 1258.68915 |        |                                                                                                 |            | ION=[M+H+H] <sup>2+</sup> |            | 53.23    | 6509.67  | 2110.33  | 39.33     |
| 1566 | 547.94 | 690.25762  |        |                                                                                                 |            | ION=[M+H] <sup>+</sup>    |            | 4919.85  | 534.33   | 124.83   | 539.00    |
| 1567 | 549.71 | 221.16372  |        |                                                                                                 |            | ION=[M+H] <sup>+</sup>    |            | 2556.15  | 2084.33  | 1279.00  | 4918.00   |
| 1568 | 550.6  | 1776.25839 |        |                                                                                                 |            | ION=[M+H+H] <sup>2+</sup> |            | 12.92    | 0.00     | 5723.33  | 365.00    |
| 1569 | 550.84 | 321.06508  |        |                                                                                                 |            | ION=[M+H] <sup>+</sup>    |            | 1534.92  | 1544.83  | 1140.67  | 4056.33   |
| 1570 | 551.42 | 739.28426  |        |                                                                                                 |            | ION=[M+H+H] <sup>2+</sup> |            | 0.00     | 2678.83  | 0.00     | 0.00      |
| 1571 | 551.44 | 2663.39248 |        |                                                                                                 |            | ION=[M+H+H] <sup>2+</sup> |            | 0.00     | 0.00     | 1677.50  | 170.33    |
| 1572 | 552.94 | 2662.89065 |        |                                                                                                 |            | ION=[M+H+H] <sup>2+</sup> |            | 35.38    | 106.33   | 4857.00  | 205.67    |
| 1573 | 554.81 | 512.24301  |        |                                                                                                 |            | ION=[M+H+H] <sup>2+</sup> |            | 1296.31  | 45.00    | 0.00     | 616.33    |
| 1574 | 555    | 199.06876  |        |                                                                                                 |            | ION=[M+H] <sup>+</sup>    |            | 1941.85  | 720.33   | 699.17   | 2863.67   |
| 1575 | 556    | 256.12202  | 15.087 | N-[4-(benzyloxy)phenyl]glycinamide                                                              | C15H16N2O2 | ION=[M+H] <sup>+</sup>    |            | 5957.08  | 2302.50  | 1500.50  | 3268.67   |
| 1576 | 556.86 | 887.79605  |        |                                                                                                 |            | ION=[M+H] <sup>+</sup>    |            | 15.23    | 47.17    | 3696.67  | 174.33    |
| 1577 | 558.84 | 1242.69428 |        |                                                                                                 |            | ION=[M+H+H] <sup>2+</sup> |            | 16.00    | 6170.17  | 1526.67  | 30.33     |
| 1578 | 559.54 | 2026.6034  |        |                                                                                                 |            | ION=[M+H+H] <sup>2+</sup> |            | 67.54    | 0.00     | 1332.67  | 0.00      |
| 1579 | 559.65 | 208.14759  | 7.902  | Nopyl acetate                                                                                   | C13H20O2   | ION=[M+H] <sup>+</sup>    |            | 870.31   | 7586.17  | 496.67   | 1458.33   |
| 1580 | 560.25 | 675.86811  |        |                                                                                                 |            | ION=[M+H] <sup>+</sup>    |            | 80.46    | 19.50    | 3020.67  | 38.67     |
| 1581 | 560.31 | 246.16267  | 7.259  | 1,3,5-Trimethyl-4-[2-(1,3,5-trimethyl-1H-pyrazol-4-yl)diazenyl]-1H-pyrazole                     | C12H18N6   | ION=[M+H] <sup>+</sup>    |            | 2975.54  | 1525.00  | 848.17   | 2241.67   |
| 1582 | 560.75 | 1351.40432 |        |                                                                                                 |            | ION=[M+H+H] <sup>2+</sup> |            | 117.23   | 48.83    | 3368.00  | 0.00      |
| 1583 | 561.9  | 403.25937  |        |                                                                                                 |            | ION=[M+H] <sup>+</sup>    |            | 0.00     | 1327.50  | 0.00     | 0.00      |
| 1584 | 562.25 | 1351.07046 |        |                                                                                                 |            | ION=[M+H+H] <sup>2+</sup> |            | 68.92    | 45.67    | 2707.83  | 0.00      |
| 1585 | 563.68 | 1252.72429 |        |                                                                                                 |            | ION=[M+H+H] <sup>2+</sup> |            | 11.23    | 6648.00  | 10780.33 | 4433.00   |
| 1586 | 564.06 | 238.15573  | 10.129 | Saccharomonopyrone B                                                                            | C14H22O3   | ION=[M+H] <sup>+</sup>    |            | 736.00   | 3673.33  | 138.33   | 408.00    |
| 1587 | 565.06 | 645.34109  |        |                                                                                                 |            | ION=[M+H] <sup>+</sup>    |            | 10.46    | 76.33    | 528.50   | 61.67     |
| 1588 | 565.64 | 1290.67279 |        |                                                                                                 |            | ION=[M+H+H] <sup>2+</sup> |            | 0.00     | 2805.67  | 2634.00  | 0.00      |
| 1589 | 566.29 | 381.1449   |        |                                                                                                 |            | ION=[M+H] <sup>+</sup>    |            | 4419.85  | 155.00   | 133.00   | 1959.33   |
| 1590 | 566.52 | 236.14193  | 10.02  | 3-(heptyloxy)benzoic Acid                                                                       | C14H20O3   | ION=[M+H] <sup>+</sup>    |            | 1981.85  | 6009.17  | 177.83   | 490.67    |
| 1591 | 568.46 | 322.21451  | 18.34  | Decylubiquinone                                                                                 | C19H30O4   | ION=[M+H] <sup>+</sup>    | 55486-00-5 | 2396.46  | 2662.17  | 2671.17  | 2222.00   |
| 1592 | 569.45 | 350.20762  |        |                                                                                                 |            | ION=[M+H] <sup>+</sup>    |            | 3171.85  | 2341.50  | 2037.50  | 1198.67   |
| 1593 | 570.65 | 1266.73862 |        |                                                                                                 |            | ION=[M+H+H] <sup>2+</sup> |            | 29.69    | 3012.33  | 5066.67  | 1105.33   |
| 1594 | 571.05 | 348.19189  |        |                                                                                                 |            | ION=[M+H] <sup>+</sup>    |            | 1954.15  | 1360.17  | 891.17   | 732.33    |
| 1595 | 571.41 | 218.06026  | 13.188 | 4-Methylumbelliferyl acetate                                                                    | C12H10O4   | ION=[M+H] <sup>+</sup>    |            | 44.00    | 3234.33  | 318.83   | 25.33     |
| 1596 | 573.27 | 1236.70668 |        |                                                                                                 |            | ION=[M+H+H] <sup>2+</sup> |            | 0.00     | 2475.17  | 537.50   | 295.33    |
| 1597 | 576.42 | 869.33489  |        |                                                                                                 |            | ION=[M+H+H] <sup>2+</sup> |            | 2362.46  | 288.17   | 1923.00  | 4477.67   |
| 1598 | 577.18 | 853.66373  |        |                                                                                                 |            | ION=[M+H] <sup>+</sup>    |            | 966.62   | 3738.67  | 3945.17  | 0.00      |
| 1599 | 577.37 | 1208.69571 |        |                                                                                                 |            | ION=[M+H+H] <sup>2+</sup> |            | 0.00     | 4232.17  | 12776.17 | 7423.67   |
| 1600 | 577.58 | 345.28722  |        |                                                                                                 |            | ION=[M+H] <sup>+</sup>    |            | 0.00     | 647.67   | 1679.50  | 135161.67 |
| 1601 | 577.74 | 853.46312  |        |                                                                                                 |            | ION=[M+H] <sup>+</sup>    |            | 1204.62  | 3176.00  | 3169.50  | 45.33     |
| 1602 | 578.77 | 404.19724  |        |                                                                                                 |            | ION=[M+H+H] <sup>2+</sup> |            | 1929.69  | 699.00   | 0.00     | 0.00      |
| 1603 | 578.8  | 853.86444  |        |                                                                                                 |            | ION=[M+H] <sup>+</sup>    |            | 1634.31  | 3182.33  | 3525.33  | 37.00     |
| 1604 | 579.09 | 336.1341   |        |                                                                                                 |            | ION=[M+H+H] <sup>2+</sup> |            | 1697.08  | 824.33   | 1303.00  | 0.00      |
| 1605 | 579.39 | 1246.64547 |        |                                                                                                 |            | ION=[M+H+H] <sup>2+</sup> |            | 0.00     | 1605.33  | 3617.33  | 294.00    |
| 1606 | 579.62 | 243.1253   | 11.534 | 2-(4-Methoxybenzylidene)quinuclidin-3-one                                                       | C15H17NO2  | ION=[M+H] <sup>+</sup>    |            | 4232.62  | 2682.50  | 2747.67  | 1170.33   |
| 1607 | 581.79 | 1250.72242 |        |                                                                                                 |            | ION=[M+H+H] <sup>2+</sup> |            | 0.00     | 7306.50  | 7881.83  | 7434.67   |
| 1608 | 581.88 | 1289.66899 |        |                                                                                                 |            | ION=[M+H+H] <sup>2+</sup> |            | 13.69    | 2022.83  | 1345.83  | 83.00     |
| 1609 | 582.24 | 197.14431  |        |                                                                                                 |            | ION=[M+H] <sup>+</sup>    |            | 2682.77  | 1681.50  | 575.33   | 1337.00   |
| 1610 | 582.41 | 297.04302  |        |                                                                                                 |            | ION=[M+H] <sup>+</sup>    |            | 2144.77  | 1508.83  | 849.67   | 1355.00   |
| 1611 | 582.54 | 1288.65624 |        |                                                                                                 |            | ION=[M+H+H] <sup>2+</sup> |            | 18.62    | 2399.17  | 1481.33  | 206.33    |
| 1612 | 583.59 | 325.03835  |        |                                                                                                 |            | ION=[M+H] <sup>+</sup>    |            | 3478.00  | 2562.17  | 1253.17  | 2251.33   |
| 1613 | 583.71 | 343.27192  |        |                                                                                                 |            | ION=[M+H] <sup>+</sup>    |            | 0.00     | 522.50   | 975.00   | 218124.33 |
| 1614 | 585.25 | 249.10516  |        |                                                                                                 |            | ION=[M+H] <sup>+</sup>    |            | 17064.92 | 3013.83  | 0.00     | 4223.67   |

|      |        |            |        |                                                      |              |                 |            |          |          |          |          |
|------|--------|------------|--------|------------------------------------------------------|--------------|-----------------|------------|----------|----------|----------|----------|
| 1615 | 586    | 1288.68691 |        |                                                      |              | ION=[M+H+H]2+   |            | 0.00     | 548.33   | 0.00     | 0.00     |
| 1616 | 586.12 | 644.34511  | 9.559  | Viresenoside R                                       | C32H52O13    | ION=[M+H]+      |            | 0.00     | 1737.67  | 1947.00  | 0.00     |
| 1617 | 588.47 | 674.35225  |        |                                                      |              | ION=[M+H]+      |            | 2710.77  | 2029.83  | 2922.17  | 3906.00  |
| 1618 | 588.9  | 1264.72617 |        |                                                      |              | ION=[M+H+H]2+   |            | 19.85    | 3709.83  | 4070.50  | 1634.33  |
| 1619 | 589.12 | 459.33063  |        |                                                      |              | ION=[M+H]+      |            | 3698.31  | 280.83   | 298.67   | 5353.67  |
| 1620 | 589.84 | 248.14254  | NA     | Parthenium                                           | C15H20O3     | ION=[M+H]+      |            | 552.77   | 3303.00  | 183.67   | 395.33   |
| 1621 | 590.28 | 352.22301  |        |                                                      |              | ION=[M+H]+      |            | 2558.77  | 1597.33  | 1803.00  | 811.00   |
| 1622 | 590.62 | 1264.75144 |        |                                                      |              | ION=[M+H+H]2+   |            | 0.00     | 2170.00  | 2968.67  | 1094.33  |
| 1623 | 590.75 | 294.22007  | 9.278  | 9-Oxo-10(E),12(E)-octadecadienoic acid               | C18H30O3     | ION=[M+H]+      |            | 3745.38  | 1718.50  | 2098.00  | 3002.33  |
| 1624 | 591.6  | 730.29854  |        |                                                      |              | ION=[M+H+H]2+   |            | 1667.54  | 2364.83  | 1905.17  | 424.67   |
| 1625 | 591.88 | 316.14297  |        |                                                      |              | ION=[M+H]+      |            | 13079.54 | 8377.33  | 19318.83 | 6528.67  |
| 1626 | 592.65 | 851.36133  |        |                                                      |              | ION=[M+H+H]2+   |            | 1507.54  | 2603.67  | 1391.33  | 2354.33  |
| 1627 | 593.04 | 632.28658  |        |                                                      |              | ION=[M+H+H]2+   |            | 0.00     | 490.17   | 0.00     | 901.67   |
| 1628 | 593.46 | 250.067    | 17.865 | 4-(Morpholin-4-yl)-7-nitro-2,1,3-benzoxadiazole      | C10H10N4O4   | ION=[M+H]+      | 18378-24-0 | 578.15   | 22086.33 | 297.50   | 531.33   |
| 1629 | 596.31 | 208.10898  | 9.391  | 2,2-Dimethyl-3-hydroxy-3-(p-tolyl)propionic acid     | C12H16O3     | ION=[M+H]+      |            | 1909.38  | 1506.33  | 1294.33  | 745.00   |
| 1630 | 597.19 | 853.34138  |        |                                                      |              | ION=[M+H+H]2+   |            | 4904.00  | 1356.17  | 6158.00  | 12020.00 |
| 1631 | 597.75 | 337.07599  | 16.958 | 2,6-Difluorophenyl N-(2,6-dimethoxybenzoyl)carbamate | C16H13F2NO5  | ION=[M+H]+      |            | 33.54    | 3498.00  | 0.00     | 0.00     |
| 1632 | 597.8  | 1328.70889 | 6.79   | Bisoxazolomycin                                      | C70H100N6O19 | ION=[M+H+H]2+   |            | 26.31    | 12417.67 | 0.00     | 0.00     |
| 1633 | 601.58 | 324.22923  | 17.046 | TOFA                                                 | C19H32O4     | ION=[M+H]+      |            | 4578.62  | 3116.33  | 3772.83  | 5104.00  |
| 1634 | 602.89 | 248.19847  |        |                                                      |              | ION=[M+H]+      |            | 2329.23  | 3392.33  | 1652.00  | 3153.33  |
| 1635 | 603.64 | 637.81236  |        |                                                      |              | ION=[M+H]+      |            | 0.00     | 1190.00  | 1421.67  | 5101.67  |
| 1636 | 608.45 | 1273.61058 |        |                                                      |              | ION=[M+H+H]2+   |            | 0.00     | 471.33   | 487.17   | 5250.67  |
| 1637 | 609.89 | 441.67488  |        |                                                      |              | ION=[M+H]+      |            | 0.00     | 571.17   | 0.00     | 0.00     |
| 1638 | 611.1  | 899.34638  |        |                                                      |              | ION=[M+H+H]2+   |            | 2342.31  | 1572.67  | 454.67   | 961.33   |
| 1639 | 611.45 | 473.34654  |        |                                                      |              | ION=[M+H]+      |            | 38889.85 | 1367.67  | 732.67   | 38740.00 |
| 1640 | 617.14 | 457.35137  |        |                                                      |              | ION=[M+H]+      |            | 6693.23  | 811.33   | 1391.67  | 2980.67  |
| 1641 | 618.8  | 222.05757  |        |                                                      |              | ION=[M+H]+      |            | 38345.38 | 42573.33 | 26746.33 | 51622.33 |
| 1642 | 619.06 | 278.08653  | 39.988 | Pukeleimide A                                        | C13H14N2O5   | ION=[M+H]+      |            | 3539.23  | 3606.00  | 3448.83  | 6508.00  |
| 1643 | 620.05 | 791.42778  |        |                                                      |              | ION=[M+H]+      |            | 591.23   | 1602.50  | 7298.67  | 5803.67  |
| 1644 | 620.11 | 791.22818  |        |                                                      |              | ION=[M+H]+      |            | 720.00   | 560.83   | 5470.50  | 5072.33  |
| 1645 | 620.52 | 809.3127   |        |                                                      |              | ION=[M+H+H]2+   |            | 265.38   | 20.33    | 239.83   | 4486.67  |
| 1646 | 621.66 | 735.49507  |        |                                                      |              | ION=[M+H]+      |            | 28.77    | 20.83    | 0.00     | 3891.67  |
| 1647 | 622.48 | 140.9506   |        |                                                      |              | ION=[M+H]+      |            | 776.31   | 567.50   | 597.67   | 233.00   |
| 1648 | 622.49 | 466.19788  |        |                                                      |              | ION=[M+H]+      |            | 1019.69  | 3041.83  | 1364.17  | 684.00   |
| 1649 | 625.28 | 227.18966  |        |                                                      |              | ION=[M+H]+      |            | 4792.62  | 5398.67  | 4617.17  | 5562.67  |
| 1650 | 626.3  | 222.08547  | NA     | Diethyl phthalate                                    | C12H14O4     | ION=[M+H]+      |            | 133.54   | 180.83   | 269.67   | 8271.67  |
| 1651 | 626.4  | 148.01611  | 6.523  | 1,3-Isobenzofurandione                               | C8H4O3       | ION=[M+H]+      |            | 466.15   | 518.33   | 412.50   | 7787.33  |
| 1652 | 627.17 | 686.27771  |        |                                                      |              | ION=[M+H+H]2+   |            | 358.31   | 2230.67  | 2107.83  | 0.00     |
| 1653 | 627.25 | 630.33106  |        |                                                      |              | ION=[M+H]+      |            | 36.31    | 0.00     | 530.50   | 526.00   |
| 1654 | 627.25 | 219.03699  | 13.915 | 3-demethylchuangxinmycin                             | C11H9NO2S    | ION=[M+H]+      |            | 304.46   | 750.00   | 766.83   | 4903.33  |
| 1655 | 627.28 | 1260.6583  |        |                                                      |              | ION=[M+H+H]2+   |            | 458.15   | 9613.33  | 2486.17  | 438.67   |
| 1656 | 627.56 | 1276.63027 |        |                                                      |              | ION=[M+H+H]2+   |            | 12.15    | 4777.83  | 2069.50  | 6961.33  |
| 1657 | 627.56 | 1244.67876 |        |                                                      |              | ION=[M+H+H]2+   |            | 0.00     | 3137.33  | 1087.50  | 771.67   |
| 1658 | 627.56 | 1184.61583 |        |                                                      |              | ION=[M+H+H]2+   |            | 0.00     | 4225.67  | 419.50   | 0.00     |
| 1659 | 628.11 | 1273.62119 |        |                                                      |              | ION=[M+H+H]2+   |            | 27.54    | 4643.50  | 1364.17  | 7444.33  |
| 1660 | 628.51 | 1274.63784 |        |                                                      |              | ION=[M+H+H]2+   |            | 0.00     | 2780.33  | 1138.67  | 6343.67  |
| 1661 | 628.83 | 1266.73809 |        |                                                      |              | ION=[M+H+H]2+   |            | 0.00     | 186.83   | 2692.00  | 6707.00  |
| 1662 | 630.25 | 851.32615  |        |                                                      |              | ION=[M+H+H]2+   |            | 2036.77  | 172.67   | 1588.50  | 113.00   |
| 1663 | 631    | 2526.38676 |        |                                                      |              | ION=[M+H+H]2+   |            | 0.00     | 0.00     | 1638.17  | 3285.67  |
| 1664 | 631    | 829.33893  |        |                                                      |              | ION=[M+H+H]2+   |            | 2545.08  | 316.50   | 20.17    | 61.33    |
| 1665 | 631.24 | 350.24501  |        |                                                      |              | ION=[M+H]+      |            | 5525.23  | 3353.00  | 6567.50  | 7280.67  |
| 1666 | 631.82 | 1263.19344 |        |                                                      |              | ION=[M+H]+      |            | 0.00     | 0.00     | 0.00     | 2496.33  |
| 1667 | 632.53 | 1264.19183 |        |                                                      |              | ION=[M+H]+      |            | 0.00     | 75.00    | 1105.33  | 6517.33  |
| 1668 | 632.61 | 2527.40738 |        |                                                      |              | ION=[M+H+H]2+   |            | 0.00     | 25.83    | 441.50   | 975.33   |
| 1669 | 632.94 | 1289.64115 |        |                                                      |              | ION=[M+H+H]2+   |            | 0.00     | 0.00     | 0.00     | 8691.00  |
| 1670 | 632.94 | 1263.69856 |        |                                                      |              | ION=[M+H]+      |            | 0.00     | 50.00    | 524.83   | 3397.67  |
| 1671 | 633.05 | 644.8193   |        |                                                      |              | ION=[M+H]+      |            | 17.23    | 12537.17 | 27337.33 | 43263.67 |
| 1672 | 633.26 | 1264.19884 |        |                                                      |              | ION=[M+H]+      |            | 0.00     | 100.67   | 562.50   | 1281.67  |
| 1673 | 633.44 | 1263.68939 |        |                                                      |              | ION=[M+H]+      |            | 12.00    | 59.83    | 2583.00  | 9624.00  |
| 1675 | 634.34 | 1290.64239 |        |                                                      |              | ION=[M+H+H]2+   |            | 0.00     | 10649.83 | 26020.67 | 34548.00 |
| 1676 | 634.51 | 1258.70258 |        |                                                      |              | ION=[M+H+H]2+   |            | 16.77    | 6184.00  | 12484.83 | 7700.33  |
| 1677 | 634.85 | 1264.72366 |        |                                                      |              | ION=[M+H+H]2+   |            | 10.46    | 110.83   | 613.00   | 8541.00  |
| 1678 | 635.2  | 645.319    |        |                                                      |              | ION=[M+H]+      |            | 0.00     | 62.00    | 38.33    | 6479.33  |
| 1679 | 635.43 | 486.2825   |        |                                                      |              | ION=[M+H]+      |            | 2641.08  | 1388.67  | 2465.50  | 4159.33  |
| 1680 | 635.58 | 1274.67487 |        |                                                      |              | ION=[M+H+H]2+   |            | 14.77    | 16523.17 | 35868.33 | 2485.33  |
| 1681 | 635.89 | 648.33546  |        |                                                      |              | ION=[M+H]+      |            | 2363.38  | 1277.17  | 2077.83  | 2922.00  |
| 1683 | 636.42 | 665.36522  |        |                                                      |              | ION=[M+H]+      |            | 1828.15  | 174.83   | 1229.33  | 1090.67  |
| 1684 | 636.54 | 648.32696  |        |                                                      |              | ION=[M+H]+      |            | 217.23   | 1315.67  | 3579.00  | 4678.00  |
| 1685 | 637.48 | 2522.32912 |        |                                                      |              | ION=[M+H+H]2+3+ |            | 26.15    | 31.83    | 0.00     | 3547.67  |
| 1686 | 637.61 | 2522.34512 |        |                                                      |              | ION=[M+H+H]2+   |            | 0.00     | 57.83    | 40.50    | 7798.33  |
| 1687 | 637.7  | 1237.57689 |        |                                                      |              | ION=[M+H+H]2+   |            | 23.23    | 1173.83  | 0.00     | 0.00     |
| 1688 | 637.83 | 1236.58694 |        |                                                      |              | ION=[M+H+H]2+   |            | 22.15    | 1998.50  | 0.00     | 0.00     |
| 1689 | 637.85 | 928.5103   |        |                                                      |              | ION=[M+H]+      |            | 754.00   | 1905.33  | 1284.00  | 1988.67  |



|      |        |            |        |                                                                  |             |                             |            |          |          |           |           |
|------|--------|------------|--------|------------------------------------------------------------------|-------------|-----------------------------|------------|----------|----------|-----------|-----------|
| 1690 | 637.9  | 1235.22377 |        |                                                                  |             | ION=[M+H] <sup>+</sup>      |            | 22.31    | 0.00     | 28.50     | 9071.67   |
| 1691 | 638.11 | 1262.18204 |        |                                                                  |             | ION=[M+H] <sup>+</sup>      |            | 0.00     | 79.17    | 257.33    | 6658.33   |
| 1692 | 638.27 | 618.29357  |        |                                                                  |             | ION=[M+H] <sup>+</sup>      |            | 0.00     | 867.50   | 0.00      | 0.00      |
| 1693 | 638.27 | 1232.59304 |        |                                                                  |             | ION=[M+H+H] <sup>2+</sup>   |            | 0.00     | 6055.50  | 4970.00   | 0.00      |
| 1694 | 638.37 | 1272.67142 |        |                                                                  |             | ION=[M+H+H] <sup>2+</sup>   |            | 24.77    | 11029.00 | 18059.83  | 2285.00   |
| 1695 | 638.9  | 867.35362  |        |                                                                  |             | ION=[M+H+H] <sup>2+</sup>   |            | 18586.31 | 29161.00 | 16451.33  | 30752.67  |
| 1696 | 638.98 | 1270.54023 |        |                                                                  |             | ION=[M+H+H] <sup>2+</sup>   |            | 0.00     | 1871.67  | 1358.17   | 0.00      |
| 1698 | 639.15 | 1367.73603 |        |                                                                  |             | ION=[M+H] <sup>+</sup>      |            | 557.85   | 785.00   | 4318.17   | 888.67    |
| 1699 | 639.4  | 1256.69346 |        |                                                                  |             | ION=[M+H+H] <sup>2+</sup>   |            | 0.00     | 5336.83  | 6393.50   | 8814.67   |
| 1700 | 639.67 | 1368.07032 |        |                                                                  |             | ION=[M+H] <sup>+</sup>      |            | 677.08   | 861.33   | 4162.50   | 1127.33   |
| 1701 | 640.08 | 1167.31289 |        |                                                                  |             | ION=[M+H] <sup>+</sup>      |            | 9789.08  | 5567.00  | 21065.17  | 13267.67  |
| 1702 | 640.37 | 363.12682  |        |                                                                  |             | ION=[M+H] <sup>+</sup>      |            | 3669.69  | 1384.67  | 883.33    | 966.67    |
| 1703 | 640.4  | 1167.64743 |        |                                                                  |             | ION=[M+H] <sup>+</sup>      |            | 10210.92 | 6101.83  | 24398.67  | 13495.00  |
| 1704 | 640.74 | 1287.62687 |        |                                                                  |             | ION=[M+H+H] <sup>2+</sup>   |            | 22.15    | 10631.83 | 13200.83  | 50762.67  |
| 1705 | 640.85 | 1251.75432 |        |                                                                  |             | ION=[M+H] <sup>+</sup>      |            | 0.00     | 1076.00  | 7511.00   | 21339.00  |
| 1706 | 641.03 | 1267.76583 |        |                                                                  |             | ION=[M+H+H] <sup>2+</sup>   |            | 0.00     | 364.00   | 2261.00   | 3940.00   |
| 1707 | 641.08 | 1303.65331 |        |                                                                  |             | ION=[M+H+H] <sup>2+</sup>   |            | 0.00     | 1389.00  | 0.00      | 0.00      |
| 1708 | 641.21 | 362.20726  | 16.536 | 5-Fluoro ADB-PINACA                                              | C19H27FN4O2 | ION=[M+H] <sup>+</sup>      |            | 1774.62  | 1255.83  | 1061.50   | 363.00    |
| 1709 | 641.4  | 271.25088  |        |                                                                  |             | ION=[M+H] <sup>+</sup>      |            | 1058.31  | 1104.33  | 1029.33   | 5587.00   |
| 1710 | 641.45 | 651.82613  |        |                                                                  |             | ION=[M+H] <sup>+</sup>      |            | 11.08    | 5056.33  | 16845.67  | 18955.67  |
| 1711 | 641.45 | 1751.96438 |        |                                                                  |             | ION=[M+H+H] <sup>2+</sup>   |            | 1135.08  | 1258.67  | 3517.33   | 1453.33   |
| 1712 | 641.72 | 1751.46593 |        |                                                                  |             | ION=[M+H+H] <sup>2+</sup>   |            | 1964.15  | 1816.67  | 4554.83   | 2041.33   |
| 1713 | 641.74 | 1250.74101 |        |                                                                  |             | ION=[M+H+H] <sup>2+</sup>   |            | 14.62    | 28914.33 | 102914.50 | 143228.00 |
| 1714 | 641.77 | 1250.76566 |        |                                                                  |             | ION=[M+H] <sup>+</sup>      |            | 0.00     | 1367.17  | 1091.67   | 229.33    |
| 1715 | 641.85 | 1750.95841 |        |                                                                  |             | ION=[M+H+H] <sup>2+</sup>   |            | 1475.38  | 1590.50  | 5203.33   | 1775.33   |
| 1716 | 642.38 | 1304.65712 |        |                                                                  |             | ION=[M+H+H] <sup>2+</sup>   |            | 26.77    | 5941.50  | 15320.00  | 20021.00  |
| 1717 | 642.51 | 1204.73389 |        |                                                                  |             | ION=[M+H+H] <sup>2+</sup>   |            | 14.77    | 1968.67  | 927.00    | 4545.67   |
| 1718 | 643.45 | 1288.68453 |        |                                                                  |             | ION=[M+H+H] <sup>2+</sup>   |            | 0.00     | 8902.00  | 18937.17  | 0.00      |
| 1719 | 643.74 | 1367.40106 |        |                                                                  |             | ION=[M+H] <sup>+</sup>      |            | 379.08   | 739.50   | 2620.17   | 63.00     |
| 1720 | 643.79 | 1272.70733 |        |                                                                  |             | ION=[M+H+H] <sup>2+</sup>   |            | 19.54    | 2434.00  | 6663.67   | 3528.67   |
| 1721 | 644.24 | 1276.19165 |        |                                                                  |             | ION=[M+H] <sup>+</sup>      |            | 0.00     | 0.00     | 114.17    | 3907.00   |
| 1722 | 644.26 | 4101.1968  |        |                                                                  |             | ION=[M+H+H] <sup>2</sup> 3+ |            | 194.77   | 176.83   | 3328.67   | 0.00      |
| 1723 | 644.47 | 1248.72595 |        |                                                                  |             | ION=[M+H+H] <sup>2+</sup>   |            | 48.46    | 28095.83 | 50288.33  | 362887.33 |
| 1724 | 644.49 | 1275.6924  |        |                                                                  |             | ION=[M+H] <sup>+</sup>      |            | 0.00     | 0.00     | 72.00     | 5963.00   |
| 1725 | 644.73 | 1277.19194 |        |                                                                  |             | ION=[M+H] <sup>+</sup>      |            | 0.00     | 0.00     | 17.67     | 2098.33   |
| 1726 | 645.12 | 1270.70666 |        |                                                                  |             | ION=[M+H+H] <sup>2+</sup>   |            | 22.00    | 2670.50  | 3652.83   | 6873.00   |
| 1727 | 645.21 | 1248.73947 |        |                                                                  |             | ION=[M+H] <sup>+</sup>      |            | 0.00     | 2077.00  | 4201.00   | 58360.67  |
| 1728 | 645.44 | 650.82152  |        |                                                                  |             | ION=[M+H] <sup>+</sup>      |            | 0.00     | 5562.17  | 10271.33  | 36826.00  |
| 1729 | 646.08 | 1302.64464 |        |                                                                  |             | ION=[M+H+H] <sup>2+</sup>   |            | 14.46    | 4861.83  | 9020.33   | 35130.67  |
| 1730 | 646.29 | 1265.75615 |        |                                                                  |             | ION=[M+H+H] <sup>2+</sup>   |            | 12.62    | 424.83   | 1435.33   | 9932.33   |
| 1731 | 646.91 | 1301.64002 |        |                                                                  |             | ION=[M+H+H] <sup>2+</sup>   |            | 0.00     | 787.67   | 0.00      | 6886.33   |
| 1732 | 647.1  | 324.19513  |        |                                                                  |             | ION=[M+H] <sup>+</sup>      |            | 2906.46  | 1259.50  | 1042.33   | 3347.00   |
| 1733 | 647.47 | 1220.72999 |        |                                                                  |             | ION=[M+H+H] <sup>2+</sup>   |            | 19.69    | 12118.17 | 4002.83   | 13102.00  |
| 1734 | 647.98 | 1242.70108 |        |                                                                  |             | ION=[M+H+H] <sup>2+</sup>   |            | 0.00     | 1963.67  | 353.67    | 446.33    |
| 1735 | 648.35 | 1258.67931 |        |                                                                  |             | ION=[M+H+H] <sup>2+</sup>   |            | 0.00     | 4401.00  | 1046.00   | 877.67    |
| 1736 | 648.54 | 1274.64991 |        |                                                                  |             | ION=[M+H+H] <sup>2+</sup>   |            | 100.92   | 2912.50  | 949.67    | 3280.00   |
| 1737 | 648.54 | 1286.67046 |        |                                                                  |             | ION=[M+H+H] <sup>2+</sup>   |            | 14.15    | 7056.67  | 9913.33   | 1940.33   |
| 1738 | 649.33 | 1770.44171 |        |                                                                  |             | ION=[M+H+H] <sup>2+</sup>   |            | 1096.31  | 985.83   | 1670.33   | 0.00      |
| 1739 | 649.83 | 403.19967  |        |                                                                  |             | ION=[M+H] <sup>+</sup>      |            | 2270.46  | 2027.17  | 1908.00   | 3526.33   |
| 1740 | 649.88 | 1273.64718 |        |                                                                  |             | ION=[M+H+H] <sup>2+</sup>   |            | 0.00     | 3074.83  | 959.00    | 3825.00   |
| 1741 | 650.26 | 386.17348  | 7.427  | (2Z,4S,5S,6S,7R,8Z)-2,9-diphenyldeca-2,8-diene-3,4,5,6,7,8-hexol | C22H26O6    | ION=[M+H] <sup>+</sup>      | 69158-41-4 | 4800.31  | 4336.17  | 4433.00   | 7341.00   |
| 1742 | 651    | 224.1898   |        |                                                                  |             | ION=[M+H] <sup>+</sup>      |            | 9790.15  | 12548.67 | 6854.17   | 14379.00  |
| 1743 | 652.02 | 1320.69646 |        |                                                                  |             | ION=[M+H] <sup>+</sup>      |            | 1074.46  | 1555.17  | 343.50    | 0.00      |
| 1744 | 653.27 | 1235.76289 |        |                                                                  |             | ION=[M+H] <sup>+</sup>      |            | 0.00     | 2065.33  | 7843.50   | 31446.67  |
| 1745 | 653.78 | 1261.71032 |        |                                                                  |             | ION=[M+H] <sup>+</sup>      |            | 0.00     | 0.00     | 413.33    | 4343.00   |
| 1746 | 654.03 | 1256.66642 |        |                                                                  |             | ION=[M+H+H] <sup>2+</sup>   |            | 12.00    | 2832.83  | 355.33    | 478.67    |
| 1747 | 654.55 | 1236.77341 |        |                                                                  |             | ION=[M+H] <sup>+</sup>      |            | 0.00     | 470.67   | 2176.00   | 1751.00   |
| 1748 | 655.35 | 1319.9518  |        |                                                                  |             | ION=[M+H] <sup>+</sup>      |            | 1255.85  | 657.67   | 378.00    | 2739.67   |
| 1749 | 655.62 | 643.82925  |        |                                                                  |             | ION=[M+H] <sup>+</sup>      |            | 0.00     | 6790.67  | 16830.50  | 42692.67  |
| 1750 | 655.74 | 1262.74507 |        |                                                                  |             | ION=[M+H+H] <sup>2+</sup>   |            | 9.38     | 138.17   | 177.00    | 5197.00   |
| 1751 | 655.77 | 1287.6585  |        |                                                                  |             | ION=[M+H+H] <sup>2+</sup>   |            | 0.00     | 536.67   | 0.00      | 0.00      |
| 1752 | 655.9  | 1067.34096 |        |                                                                  |             | ION=[M+H] <sup>+</sup>      |            | 841.23   | 542.83   | 2490.83   | 958.67    |
| 1753 | 655.96 | 1320.70226 |        |                                                                  |             | ION=[M+H] <sup>+</sup>      |            | 5818.15  | 4188.33  | 24707.33  | 16342.33  |
| 1754 | 656.62 | 1234.74603 |        |                                                                  |             | ION=[M+H+H] <sup>2+</sup>   |            | 0.00     | 35544.50 | 92839.83  | 278635.67 |
| 1755 | 656.66 | 1066.94108 |        |                                                                  |             | ION=[M+H] <sup>+</sup>      |            | 759.85   | 782.00   | 3079.50   | 891.00    |
| 1756 | 656.81 | 1288.66352 |        |                                                                  |             | ION=[M+H+H] <sup>2+</sup>   |            | 11.23    | 7030.83  | 15841.50  | 34697.00  |
| 1757 | 656.85 | 1234.7613  |        |                                                                  |             | ION=[M+H] <sup>+</sup>      |            | 0.00     | 3749.00  | 11645.00  | 43507.00  |
| 1758 | 656.9  | 352.26029  |        |                                                                  |             | ION=[M+H] <sup>+</sup>      |            | 2533.54  | 1485.00  | 2175.67   | 3644.67   |
| 1759 | 656.95 | 1066.73902 |        |                                                                  |             | ION=[M+H] <sup>+</sup>      |            | 718.31   | 589.50   | 3055.83   | 1275.00   |
| 1760 | 657.27 | 1056.35723 |        |                                                                  |             | ION=[M+H] <sup>+</sup>      |            | 2146.62  | 1922.67  | 11735.67  | 7171.67   |
| 1761 | 657.31 | 1056.15665 |        |                                                                  |             | ION=[M+H] <sup>+</sup>      |            | 2134.15  | 1992.17  | 11400.67  | 6875.67   |
| 1762 | 657.33 | 1067.13827 |        |                                                                  |             | ION=[M+H] <sup>+</sup>      |            | 821.23   | 651.83   | 3432.17   | 1378.00   |
| 1763 | 657.54 | 1055.9557  |        |                                                                  |             | ION=[M+H] <sup>+</sup>      |            | 1109.23  | 1302.67  | 6985.17   | 3464.00   |

|      |        |            |        |                    |              |                           |         |          |          |           |
|------|--------|------------|--------|--------------------|--------------|---------------------------|---------|----------|----------|-----------|
| 1764 | 657.67 | 1056.75387 |        |                    |              | ION=[M+H] <sup>+</sup>    | 835.38  | 941.67   | 6960.83  | 3497.67   |
| 1765 | 657.85 | 1256.72535 |        |                    |              | ION=[M+H+H] <sup>2+</sup> | 42.31   | 3877.17  | 6223.83  | 5530.67   |
| 1766 | 658.22 | 2639.90289 |        |                    |              | ION=[M+H+H] <sup>2+</sup> | 3530.92 | 4319.00  | 28064.33 | 11982.95  |
| 1767 | 658.43 | 1272.69477 |        |                    |              | ION=[M+H+H] <sup>2+</sup> | 10.46   | 10113.33 | 18703.17 | 1093.00   |
| 1768 | 658.51 | 688.29399  |        |                    |              | ION=[M+H+H] <sup>2+</sup> | 210.00  | 1524.33  | 1378.50  | 0.00      |
| 1769 | 658.97 | 1056.55858 |        |                    |              | ION=[M+H] <sup>+</sup>    | 1679.23 | 1993.33  | 10181.67 | 5883.00   |
| 1770 | 659.04 | 1196.65206 |        |                    |              | ION=[M+H+H] <sup>2+</sup> | 0.00    | 7161.83  | 3440.67  | 0.00      |
| 1771 | 659.13 | 1259.19391 |        |                    |              | ION=[M+H] <sup>+</sup>    | 0.00    | 0.00     | 0.00     | 1186.00   |
| 1772 | 659.42 | 1259.20505 |        |                    |              | ION=[M+H] <sup>+</sup>    | 0.00    | 0.00     | 0.00     | 1574.33   |
| 1773 | 659.57 | 1232.72987 |        |                    |              | ION=[M+H+H] <sup>2+</sup> | 13.54   | 27361.00 | 37997.83 | 493810.33 |
| 1774 | 660.17 | 1286.65005 |        |                    |              | ION=[M+H+H] <sup>2+</sup> | 38.31   | 5785.17  | 5598.00  | 39416.67  |
| 1775 | 660.36 | 1257.72033 |        |                    |              | ION=[M+H+H] <sup>2+</sup> | 9.54    | 2537.33  | 3735.67  | 3272.00   |
| 1776 | 660.52 | 2518.3883  |        |                    |              | ION=[M+H+H] <sup>2+</sup> | 0.00    | 10.83    | 0.00     | 5151.00   |
| 1777 | 660.54 | 1259.69513 |        |                    |              | ION=[M+H] <sup>+</sup>    | 6.31    | 26.67    | 0.00     | 7321.67   |
| 1778 | 660.94 | 1260.20322 |        |                    |              | ION=[M+H] <sup>+</sup>    | 0.00    | 0.00     | 0.00     | 6509.00   |
| 1779 | 660.97 | 851.32688  |        |                    |              | ION=[M+H+H] <sup>2+</sup> | 6575.08 | 2155.33  | 10899.17 | 17434.00  |
| 1780 | 661.1  | 1254.70944 |        |                    |              | ION=[M+H+H] <sup>2+</sup> | 0.00    | 2538.50  | 2657.00  | 7420.33   |
| 1781 | 661.21 | 643.32393  |        |                    |              | ION=[M+H] <sup>+</sup>    | 24.15   | 0.00     | 421.00   | 0.00      |
| 1782 | 661.73 | 1259.70759 |        |                    |              | ION=[M+H] <sup>+</sup>    | 0.00    | 21.83    | 0.00     | 1289.33   |
| 1783 | 661.75 | 2273.18939 |        |                    |              | ION=[M+H+H] <sup>2+</sup> | 70.15   | 0.00     | 559.67   | 0.00      |
| 1784 | 661.95 | 2272.67985 |        |                    |              | ION=[M+H+H] <sup>2+</sup> | 290.00  | 378.83   | 1493.67  | 0.00      |
| 1785 | 662.02 | 1230.61233 |        |                    |              | ION=[M+H+H] <sup>2+</sup> | 0.00    | 3697.83  | 2062.67  | 98.33     |
| 1786 | 662.92 | 1136.84331 |        |                    |              | ION=[M+H] <sup>+</sup>    | 1044.00 | 1126.17  | 3719.83  | 146.33    |
| 1787 | 662.95 | 1136.59335 |        |                    |              | ION=[M+H] <sup>+</sup>    | 788.62  | 621.33   | 2341.17  | 65.67     |
| 1788 | 663.09 | 849.34536  |        |                    |              | ION=[M+H+H] <sup>2+</sup> | 2304.00 | 3862.00  | 2825.33  | 3918.33   |
| 1789 | 663.17 | 1137.09062 |        |                    |              | ION=[M+H] <sup>+</sup>    | 436.15  | 857.67   | 2695.33  | 234.33    |
| 1790 | 663.23 | 1264.56347 |        |                    |              | ION=[M+H+H] <sup>2+</sup> | 0.00    | 447.17   | 0.00     | 0.00      |
| 1791 | 663.34 | 1268.56936 |        |                    |              | ION=[M+H+H] <sup>2+</sup> | 11.08   | 2249.17  | 2637.33  | 0.00      |
| 1792 | 663.44 | 335.22311  |        |                    |              | ION=[M+H] <sup>+</sup>    | 30.00   | 355.33   | 3323.33  | 0.00      |
| 1793 | 663.57 | 1248.77563 |        |                    |              | ION=[M+H] <sup>+</sup>    | 0.00    | 1648.33  | 5255.00  | 13703.33  |
| 1794 | 663.65 | 642.82471  |        |                    |              | ION=[M+H] <sup>+</sup>    | 0.00    | 6221.33  | 6761.50  | 51988.33  |
| 1795 | 663.76 | 1249.77885 |        |                    |              | ION=[M+H] <sup>+</sup>    | 0.00    | 783.83   | 3919.17  | 9087.33   |
| 1796 | 664.8  | 1248.76118 |        |                    |              | ION=[M+H+H] <sup>2+</sup> | 10.92   | 17131.83 | 47763.50 | 88371.33  |
| 1797 | 664.87 | 1302.67918 |        |                    |              | ION=[M+H+H] <sup>2+</sup> | 111.08  | 3493.67  | 8414.83  | 12370.33  |
| 1798 | 665.07 | 650.83783  |        |                    |              | ION=[M+H] <sup>+</sup>    | 0.00    | 4483.83  | 10276.17 | 14224.67  |
| 1799 | 666.27 | 1286.70685 |        |                    |              | ION=[M+H+H] <sup>2+</sup> | 30.62   | 4580.50  | 8231.50  | 178.67    |
| 1800 | 666.33 | 3484.94161 |        |                    |              | ION=[M+H+H] <sup>2+</sup> | 864.62  | 2230.00  | 9718.67  | 3112.33   |
| 1801 | 666.49 | 326.00096  |        |                    |              | ION=[M+H] <sup>+</sup>    | 4544.00 | 3607.83  | 2956.17  | 4621.00   |
| 1802 | 666.93 | 1161.98235 |        |                    |              | ION=[M+H] <sup>+</sup>    | 1688.92 | 3341.00  | 10444.33 | 3698.00   |
| 1803 | 667.08 | 1270.72161 |        |                    |              | ION=[M+H+H] <sup>2+</sup> | 34.62   | 1912.83  | 1988.67  | 2421.33   |
| 1804 | 667.34 | 1270.7396  |        |                    |              | ION=[M+H+H] <sup>2+</sup> | 10.00   | 398.00   | 1628.17  | 1037.33   |
| 1805 | 667.59 | 488.29875  |        |                    |              | ION=[M+H] <sup>+</sup>    | 2385.69 | 951.83   | 1866.17  | 4815.33   |
| 1806 | 667.6  | 643.35106  |        |                    |              | ION=[M+H] <sup>+</sup>    | 0.00    | 530.33   | 0.00     | 0.00      |
| 1807 | 667.7  | 1246.74712 |        |                    |              | ION=[M+H+H] <sup>2+</sup> | 42.92   | 13923.17 | 20843.33 | 202299.00 |
| 1808 | 667.7  | 1246.76    |        |                    |              | ION=[M+H] <sup>+</sup>    | 0.00    | 1223.00  | 1061.17  | 27693.00  |
| 1809 | 668.23 | 1268.72585 |        |                    |              | ION=[M+H+H] <sup>2+</sup> | 0.00    | 1408.67  | 1642.83  | 4389.67   |
| 1810 | 668.28 | 650.35324  |        |                    |              | ION=[M+H] <sup>+</sup>    | 2259.23 | 741.33   | 188.83   | 0.00      |
| 1811 | 668.39 | 1118.5988  |        |                    |              | ION=[M+H] <sup>+</sup>    | 1943.54 | 1034.00  | 6036.67  | 5643.33   |
| 1812 | 668.51 | 667.38152  |        |                    |              | ION=[M+H] <sup>+</sup>    | 1929.23 | 176.50   | 1122.67  | 1615.33   |
| 1813 | 668.63 | 4085.18853 |        |                    |              | ION=[M+H+H] <sup>2+</sup> | 78.46   | 224.17   | 1527.50  | 529.00    |
| 1814 | 668.65 | 326.24515  |        |                    |              | ION=[M+H] <sup>+</sup>    | 3680.31 | 1550.33  | 3421.17  | 7900.67   |
| 1815 | 668.8  | 1162.31885 |        |                    |              | ION=[M+H] <sup>+</sup>    | 1969.69 | 3505.67  | 6369.83  | 2518.33   |
| 1816 | 668.85 | 1362.40642 |        |                    |              | ION=[M+H] <sup>+</sup>    | 154.92  | 882.33   | 3581.17  | 1363.67   |
| 1817 | 669.03 | 1300.66759 |        |                    |              | ION=[M+H+H] <sup>2+</sup> | 55.38   | 2595.83  | 2198.17  | 27731.00  |
| 1818 | 669.03 | 4470.41005 |        |                    |              | ION=[M+H+H] <sup>2+</sup> | 182.00  | 170.33   | 1219.50  | 340.00    |
| 1819 | 669.39 | 652.49164  |        |                    |              | ION=[M+H+H] <sup>2+</sup> | 587.85  | 0.00     | 0.00     | 0.00      |
| 1820 | 669.76 | 1263.76728 |        |                    |              | ION=[M+H+H] <sup>2+</sup> | 0.00    | 138.50   | 320.83   | 3456.33   |
| 1821 | 669.97 | 881.33534  |        |                    |              | ION=[M+H+H] <sup>2+</sup> | 6836.15 | 3590.67  | 1037.50  | 2059.33   |
| 1822 | 670.68 | 171.16326  | 4.65   | Decanamide         | C10H21NO     | ION=[M+H] <sup>+</sup>    | 5789.23 | 5402.83  | 4059.00  | 9999.67   |
| 1823 | 670.99 | 582.24908  |        |                    |              | ION=[M+H] <sup>+</sup>    | 117.38  | 1516.00  | 17.33    | 0.00      |
| 1824 | 671.48 | 721.516    |        |                    |              | ION=[M+H] <sup>+</sup>    | 221.08  | 117.00   | 93.00    | 5729.33   |
| 1825 | 671.52 | 642.85028  |        |                    |              | ION=[M+H] <sup>+</sup>    | 0.00    | 2680.83  | 2810.50  | 239.67    |
| 1826 | 671.56 | 378.24058  |        |                    |              | ION=[M+H] <sup>+</sup>    | 0.00    | 47.83    | 3527.50  | 0.00      |
| 1827 | 671.95 | 1162.65248 |        |                    |              | ION=[M+H] <sup>+</sup>    | 1008.00 | 2482.00  | 4028.17  | 1318.33   |
| 1828 | 672.29 | 649.83139  |        |                    |              | ION=[M+H] <sup>+</sup>    | 19.85   | 3420.33  | 4422.50  | 32731.67  |
| 1829 | 672.74 | 807.29895  |        |                    |              | ION=[M+H+H] <sup>2+</sup> | 202.92  | 54.33    | 145.33   | 4178.33   |
| 1830 | 673.14 | 1284.68926 |        |                    |              | ION=[M+H+H] <sup>2+</sup> | 0.00    | 3741.83  | 3712.33  | 1124.33   |
| 1831 | 673.72 | 253.94274  |        |                    |              | ION=[M+H] <sup>+</sup>    | 4257.54 | 4466.00  | 3888.50  | 1736.67   |
| 1832 | 677.34 | 1084.55766 |        |                    |              | ION=[M+H+H] <sup>2+</sup> | 9.85    | 0.00     | 3074.67  | 44.00     |
| 1833 | 678.19 | 362.24483  | 14.235 | Diheptyl phthalate | C22H34O4     | ION=[M+H] <sup>+</sup>    | 0.00    | 0.00     | 4312.00  | 0.00      |
| 1834 | 678.46 | 524.22547  |        |                    |              | ION=[M+H+H] <sup>2+</sup> | 311.85  | 723.50   | 3075.17  | 0.00      |
| 1835 | 678.89 | 897.33247  | 14.137 | Mureidomycin C     | C40H51N9O13S | ION=[M+H+H] <sup>2+</sup> | 4480.77 | 3341.50  | 769.83   | 1373.67   |
| 1836 | 680.33 | 185.95002  |        |                    |              | ION=[M+H] <sup>+</sup>    | 7644.62 | 7838.83  | 8754.83  | 8643.33   |
| 1837 | 682.21 | 632.7819   |        |                    |              | ION=[M+H] <sup>+</sup>    | 0.00    | 5863.83  | 2633.83  | 0.00      |
| 1838 | 682.29 | 1263.5819  |        |                    |              | ION=[M+H+H] <sup>2+</sup> | 0.00    | 1510.17  | 1836.33  | 0.00      |

|      |        |            |        |                                                                    |                |                                         |             |          |          |           |          |
|------|--------|------------|--------|--------------------------------------------------------------------|----------------|-----------------------------------------|-------------|----------|----------|-----------|----------|
| 1839 | 682.94 | 228.03656  | 9.975  | 2-(2-Thienyl)-1,4-dihydroquinazolin-4-one                          | C12H8N2OS      | ION=[M+H] <sup>+</sup>                  |             | 4033.38  | 93.50    | 125.17    | 1749.33  |
| 1840 | 683.15 | 1265.56872 |        |                                                                    |                | ION=[M+H+H] <sup>2+</sup>               |             | 0.00     | 353.33   | 504.83    | 0.00     |
| 1841 | 683.26 | 1266.5706  |        |                                                                    |                | ION=[M+H+H] <sup>2+</sup>               |             | 16.62    | 5043.67  | 2722.83   | 30.33    |
| 1842 | 683.35 | 1108.36143 |        |                                                                    |                | ION=[M+H] <sup>+</sup>                  |             | 800.62   | 534.33   | 3599.00   | 312.67   |
| 1843 | 683.84 | 625.30051  |        |                                                                    |                | ION=[M+H] <sup>+</sup>                  |             | 0.00     | 76.00    | 511.67    | 0.00     |
| 1844 | 684.81 | 1234.62281 | 7.862  | Pseudomycin-C'                                                     | C53H91ClN12O19 | ION=[M+H+H] <sup>2+</sup>               |             | 0.00     | 2520.83  | 1053.83   | 0.00     |
| 1845 | 687.49 | 542.19605  |        |                                                                    |                | ION=[M+H+H] <sup>2+</sup>               |             | 1824.00  | 818.00   | 2253.00   | 3741.00  |
| 1846 | 687.93 | 503.30888  |        |                                                                    |                | ION=[M+H] <sup>+</sup>                  |             | 3721.23  | 840.33   | 4101.17   | 6776.00  |
| 1847 | 688.62 | 1256.67254 |        |                                                                    |                | ION=[M+H+H] <sup>2+</sup>               |             | 22.00    | 346.67   | 4238.17   | 0.00     |
| 1848 | 690.71 | 897.36144  |        |                                                                    |                | ION=[M+H+H] <sup>2+</sup>               |             | 739.08   | 1530.17  | 385.33    | 842.67   |
| 1849 | 690.86 | 1255.12716 |        |                                                                    |                | ION=[M+H] <sup>+</sup>                  |             | 0.00     | 269.00   | 2577.17   | 23.33    |
| 1850 | 691.56 | 325.37033  |        |                                                                    |                | ION=[M+H] <sup>+</sup>                  |             | 2778.00  | 1123.00  | 1332.33   | 2407.67  |
| 1851 | 691.91 | 729.28254  |        |                                                                    |                | ION=[M+H] <sup>+</sup>                  |             | 2803.85  | 109.33   | 943.83    | 5482.33  |
| 1852 | 692.01 | 1254.12781 |        |                                                                    |                | ION=[M+H] <sup>+</sup>                  |             | 13.38    | 277.83   | 2511.83   | 0.00     |
| 1853 | 692.15 | 1226.68587 |        |                                                                    |                | ION=[M+H] <sup>+</sup>                  |             | 16.00    | 3068.17  | 2213.83   | 0.00     |
| 1854 | 692.25 | 1279.57812 |        |                                                                    |                | ION=[M+H+H] <sup>2+</sup>               |             | 0.00     | 12961.00 | 28658.67  | 38.67    |
| 1855 | 692.25 | 1253.62776 |        |                                                                    |                | ION=[M+H] <sup>+</sup>                  |             | 7.54     | 121.17   | 2418.50   | 26.67    |
| 1856 | 692.27 | 1254.62775 |        |                                                                    |                | ION=[M+H] <sup>+</sup>                  |             | 25.85    | 301.50   | 4163.50   | 0.00     |
| 1857 | 692.32 | 1258.62864 |        |                                                                    |                | ION=[M+H+H] <sup>2+</sup>               |             | 0.00     | 97.00    | 2071.50   | 40.67    |
| 1858 | 692.35 | 732.27918  |        |                                                                    |                | ION=[M+H+H] <sup>2+</sup>               |             | 2605.38  | 363.83   | 1256.17   | 5336.33  |
| 1859 | 692.42 | 1254.63624 |        |                                                                    |                | ION=[M+H] <sup>+</sup>                  |             | 0.00     | 327.00   | 1550.33   | 0.00     |
| 1860 | 692.52 | 437.25414  |        |                                                                    |                | ION=[M+H] <sup>+</sup>                  |             | 3597.85  | 1300.00  | 4821.00   | 1793.67  |
| 1861 | 692.89 | 1280.58024 |        |                                                                    |                | ION=[M+H+H] <sup>2+</sup>               |             | 0.00     | 11603.17 | 27023.83  | 0.00     |
| 1862 | 692.94 | 514.31171  | 12.131 | Microsporin B                                                      | C28H42N4O5     | ION=[M+H] <sup>+</sup>                  |             | 4365.23  | 452.50   | 3896.50   | 11505.00 |
| 1863 | 693.18 | 352.26121  | 5.163  | 1-[4-(2,4,4-trimethylpentan-2-yl)phenyl]-1,4,7,10-tetraoxaundecane | C21H36O4       | ION=[M+H] <sup>+</sup>                  |             | 10789.23 | 798.00   | 10073.83  | 28027.67 |
| 1864 | 693.33 | 2492.28441 |        |                                                                    |                | ION=[M+H+H] <sup>2+</sup>               |             | 0.00     | 0.00     | 1297.17   | 0.00     |
| 1865 | 693.74 | 693.39539  |        |                                                                    |                | ION=[M+H] <sup>+</sup>                  |             | 3377.85  | 78.17    | 1951.33   | 5423.67  |
| 1866 | 693.74 | 849.34555  |        |                                                                    |                | ION=[M+H+H] <sup>2+</sup>               |             | 7269.54  | 2183.00  | 86.83     | 865.33   |
| 1867 | 694.02 | 1248.64141 |        |                                                                    |                | ION=[M+H+H] <sup>2+</sup>               |             | 19.85    | 5695.50  | 17000.83  | 0.00     |
| 1868 | 694.25 | 1264.61066 |        |                                                                    |                | ION=[M+H+H] <sup>2+</sup>               |             | 0.00     | 13628.83 | 40643.67  | 0.00     |
| 1869 | 694.27 | 198.12722  | 7.529  | Alkyldihydropyrone A                                               | C11H18O3       | ION=[M+H] <sup>+</sup>                  |             | 1852.46  | 3312.17  | 950.67    | 4214.33  |
| 1870 | 695.08 | 324.21532  |        |                                                                    |                | ION=[M+H] <sup>+</sup>                  |             | 1769.54  | 1155.33  | 3847.17   | 5265.33  |
| 1871 | 696.16 | 1058.59106 |        |                                                                    |                | ION=[M+H] <sup>+</sup>                  |             | 1600.62  | 1488.67  | 5349.17   | 6039.67  |
| 1872 | 696.67 | 708.35748  | 8.407  | VM48642                                                            | C40H52O11      | ION=[M+H+H] <sup>2+</sup>               |             | 3574.00  | 1219.17  | 0.00      | 107.33   |
| 1873 | 697.4  | 1057.83854 |        |                                                                    |                | ION=[M+H] <sup>+</sup>                  |             | 384.00   | 759.50   | 1478.83   | 3345.67  |
| 1874 | 697.43 | 2115.68206 |        |                                                                    |                | ION=[M+H+H] <sup>2+</sup>               |             | 1703.23  | 1518.33  | 5851.67   | 5902.33  |
| 1875 | 697.61 | 1058.09179 |        |                                                                    |                | ION=[M+H] <sup>+</sup>                  |             | 2014.46  | 2413.17  | 9668.67   | 9584.33  |
| 1876 | 697.92 | 1274.63945 |        |                                                                    |                | ION=[M+H+H] <sup>2+</sup>               |             | 0.00     | 1046.50  | 3809.33   | 128.33   |
| 1877 | 698.58 | 1410.45574 |        |                                                                    |                | ION=[M+H] <sup>+</sup>                  |             | 623.69   | 622.67   | 2083.33   | 1433.33  |
| 1878 | 699.08 | 1267.13813 |        |                                                                    |                | ION=[M+H] <sup>+</sup>                  |             | 0.00     | 0.00     | 979.50    | 0.00     |
| 1879 | 699.12 | 248.14267  |        |                                                                    |                | ION=[M+H] <sup>+</sup>                  |             | 3156.00  | 2937.83  | 397.17    | 3288.33  |
| 1880 | 699.38 | 578.28527  |        |                                                                    |                | ION=[M+H+H] <sup>2+</sup>               |             | 3724.46  | 607.33   | 0.00      | 0.00     |
| 1881 | 699.81 | 1296.59714 |        |                                                                    |                | ION=[M+H+H] <sup>2+</sup>               |             | 0.00     | 7158.83  | 18577.00  | 0.00     |
| 1882 | 699.83 | 1257.70169 |        |                                                                    |                | ION=[M+H+H] <sup>2+</sup>               |             | 0.00     | 825.00   | 3224.50   | 8.67     |
| 1883 | 700    | 1240.6912  |        |                                                                    |                | ION=[M+H] <sup>+</sup>                  |             | 0.00     | 2768.33  | 20875.67  | 0.00     |
| 1884 | 700.33 | 316.20413  | 18.855 | Cafestol                                                           | C20H28O3       | ION=[M+H] <sup>+</sup>                  |             | 1946.62  | 1468.83  | 3760.00   | 3784.33  |
| 1885 | 700.45 | 1240.67825 |        |                                                                    |                | ION=[M+H+H] <sup>2+</sup>               |             | 47.85    | 35334.00 | 153897.33 | 0.00     |
| 1886 | 700.46 | 1294.59463 |        |                                                                    |                | ION=[M+H+H] <sup>2+</sup>               |             | 28.31    | 7044.67  | 18926.33  | 0.00     |
| 1887 | 701.4  | 1262.65753 |        |                                                                    |                | ION=[M+H+H] <sup>2+</sup>               |             | 45.85    | 2537.17  | 9392.50   | 0.00     |
| 1888 | 701.7  | 1278.62652 |        |                                                                    |                | ION=[M+H+H] <sup>2+</sup>               |             | 27.23    | 7064.83  | 26102.50  | 0.00     |
| 1889 | 703.42 | 333.09943  | 14.811 | Flurtamone                                                         | C18H14F3NO2    | ION=[M+H] <sup>+</sup>                  | 96525-23-4  | 1676.77  | 1204.83  | 646.33    | 2449.67  |
| 1890 | 703.77 | 865.33945  |        |                                                                    |                | ION=[M+H+H] <sup>2+</sup>               |             | 21616.31 | 38527.00 | 34113.50  | 62648.00 |
| 1891 | 703.83 | 479.20579  | 13.976 | Nicardipine                                                        | C26H29N3O6     | ION=[M+H] <sup>+</sup>                  |             | 6663.85  | 10999.00 | 11318.00  | 6081.00  |
| 1892 | 704.34 | 821.34785  |        |                                                                    |                | ION=[M+H+H] <sup>2+</sup>               |             | 1431.08  | 127.67   | 100.67    | 230.33   |
| 1893 | 705.38 | 526.25818  |        |                                                                    |                | ION=[M+H+H] <sup>2+</sup>               |             | 0.00     | 38.83    | 452.33    | 4422.33  |
| 1894 | 706.18 | 708.28389  |        |                                                                    |                | ION=[M+H+H] <sup>2+</sup>               |             | 2079.54  | 823.50   | 1516.33   | 4473.33  |
| 1895 | 706.44 | 705.28499  |        |                                                                    |                | ION=[M+H] <sup>+</sup>                  |             | 2090.15  | 524.17   | 1407.67   | 3823.67  |
| 1896 | 706.94 | 388.19099  |        |                                                                    |                | ION=[M+H+H] <sup>2+</sup>               |             | 0.00     | 0.00     | 983.33    | 0.00     |
| 1897 | 706.95 | 490.31413  | 11.305 | Sapacitabine                                                       | C26H42N4O5     | ION=[M+H] <sup>+</sup>                  | 151823-14-2 | 3367.38  | 921.00   | 2257.33   | 7955.00  |
| 1898 | 707.11 | 194.09556  | 10.222 | Nakienone A                                                        | C11H14O3       | ION=[M+H] <sup>+</sup>                  |             | 3346.92  | 3459.67  | 2311.33   | 0.00     |
| 1899 | 707.62 | 328.26092  | 9.135  | Valsafungin B                                                      | C19H36O4       | ION=[M+H] <sup>+</sup>                  |             | 9896.15  | 2021.50  | 5881.67   | 22249.67 |
| 1900 | 707.98 | 669.39594  |        |                                                                    |                | ION=[M+H] <sup>+</sup>                  |             | 3122.31  | 288.00   | 1529.33   | 5101.33  |
| 1901 | 710.16 | 212.14494  |        |                                                                    |                | ION=[M+H] <sup>+</sup>                  |             | 2334.62  | 1865.67  | 1194.00   | 1732.33  |
| 1902 | 711.58 | 864.62044  |        |                                                                    |                | ION=[M+H+H] <sup>2+</sup> <sup>3+</sup> |             | 413.69   | 0.00     | 0.00      | 0.00     |
| 1903 | 715.9  | 1278.60074 |        |                                                                    |                | ION=[M+H+H] <sup>2+</sup>               |             | 44.00    | 7320.83  | 18308.00  | 75.00    |
| 1905 | 716.24 | 1224.69631 |        |                                                                    |                | ION=[M+H] <sup>+</sup>                  |             | 0.00     | 2579.00  | 13986.33  | 0.00     |
| 1906 | 716.55 | 526.24089  |        |                                                                    |                | ION=[M+H+H] <sup>2+</sup>               |             | 221.54   | 657.50   | 2473.00   | 78.00    |
| 1907 | 717.28 | 1262.6307  |        |                                                                    |                | ION=[M+H+H] <sup>2+</sup>               |             | 0.00     | 7319.33  | 22381.00  | 0.00     |
| 1908 | 717.9  | 451.26968  | 8.695  | Microtermolide A                                                   | C23H37N3O6     | ION=[M+H] <sup>+</sup>                  |             | 6763.23  | 10890.00 | 5198.17   | 10554.33 |
| 1909 | 719.2  | 360.19191  |        |                                                                    |                | ION=[M+H] <sup>+</sup>                  |             | 2319.23  | 960.17   | 1794.50   | 1367.00  |
| 1910 | 720.58 | 1246.62054 |        |                                                                    |                | ION=[M+H+H] <sup>2+</sup>               |             | 0.00     | 678.83   | 4788.50   | 0.00     |
| 1912 | 723.04 | 1230.6492  |        |                                                                    |                | ION=[M+H+H] <sup>2+</sup>               |             | 0.00     | 615.67   | 2692.83   | 0.00     |
| 1913 | 723.18 | 1294.61472 |        |                                                                    |                | ION=[M+H+H] <sup>2+</sup>               |             | 16.00    | 4164.17  | 11150.50  | 0.00     |



|      |        |            |        |                                                                                            |            |                           |             |          |          |          |        |
|------|--------|------------|--------|--------------------------------------------------------------------------------------------|------------|---------------------------|-------------|----------|----------|----------|--------|
| 1914 | 723.31 | 493.31708  |        |                                                                                            |            | ION=[M+H] <sup>+</sup>    | 2106.62     | 1739.33  | 3011.17  | 3310.67  |        |
| 1915 | 723.34 | 1239.71367 |        |                                                                                            |            | ION=[M+H] <sup>+</sup>    | 0.00        | 808.50   | 3504.17  | 15.67    |        |
| 1916 | 723.54 | 1238.71381 |        |                                                                                            |            | ION=[M+H] <sup>+</sup>    | 0.00        | 1031.17  | 6102.17  | 12.67    |        |
| 1917 | 724.03 | 1292.61621 |        |                                                                                            |            | ION=[M+H+H] <sup>2+</sup> | 0.00        | 3779.83  | 11498.00 | 0.00     |        |
| 1918 | 724.44 | 1238.69836 |        |                                                                                            |            | ION=[M+H+H] <sup>2+</sup> | 17.08       | 19163.17 | 75944.00 | 0.00     |        |
| 1919 | 724.66 | 544.21384  |        |                                                                                            |            | ION=[M+H+H] <sup>2+</sup> | 2381.69     | 1335.00  | 2307.50  | 4973.67  |        |
| 1920 | 725.18 | 541.2113   | 18.626 | SMTP-42                                                                                    | C29H35NO7S | ION=[M+H] <sup>+</sup>    | 2232.15     | 1011.00  | 1907.83  | 4919.00  |        |
| 1921 | 725.19 | 1260.67476 |        |                                                                                            |            | ION=[M+H+H] <sup>2+</sup> | 65.23       | 1501.00  | 3517.50  | 0.00     |        |
| 1922 | 725.64 | 1276.64631 |        |                                                                                            |            | ION=[M+H+H] <sup>2+</sup> | 0.00        | 3535.33  | 10710.50 | 0.00     |        |
| 1923 | 725.93 | 678.38436  | 18.724 | 18-O-b-d-Glucopyranosyl-18R-hydroxydihydroalloprotolichesterinate21-O-a-l-rhamnopyranoside | C33H58O14  | ION=[M+H] <sup>+</sup>    | 1380.92     | 183.33   | 1612.50  | 3032.00  |        |
| 1924 | 726.51 | 439.26988  |        |                                                                                            |            | ION=[M+H] <sup>+</sup>    | 3800.62     | 9334.00  | 3232.83  | 3517.00  |        |
| 1925 | 726.65 | 516.32771  | 18.77  | IC202C                                                                                     | C23H44N6O7 | ION=[M+H] <sup>+</sup>    | 1393.23     | 56.50    | 1663.83  | 3736.00  |        |
| 1926 | 726.9  | 354.2768   | 11.714 | 2-Linoleoyl glycerol                                                                       | C21H38O4   | ION=[M+H] <sup>+</sup>    | 2680.46     | 401.50   | 3197.00  | 7182.67  |        |
| 1927 | 727.5  | 1206.72982 |        |                                                                                            |            | ION=[M+H] <sup>+</sup>    | 21.23       | 100.00   | 2141.33  | 0.00     |        |
| 1928 | 729.59 | 1206.71622 | 7.2    | Oasomycin C                                                                                | C61H106O23 | ION=[M+H+H] <sup>2+</sup> | 0.00        | 2592.50  | 30849.83 | 287.33   |        |
| 1929 | 733.88 | 526.33142  |        |                                                                                            |            | ION=[M+H+H] <sup>2+</sup> | 16.77       | 0.00     | 507.50   | 4296.67  |        |
| 1930 | 734.24 | 881.33194  |        |                                                                                            |            | ION=[M+H+H] <sup>2+</sup> | 2244.00     | 756.17   | 315.50   | 839.33   |        |
| 1931 | 735.19 | 281.19955  | 15.004 | Penibruguieramine A                                                                        | C16H27NO3  | ION=[M+H] <sup>+</sup>    | 2080.00     | 3315.17  | 60.83    | 29.67    |        |
| 1932 | 735.28 | 3591.85549 |        |                                                                                            |            | ION=[M+H+H] <sup>2+</sup> | 230.31      | 326.00   | 939.00   | 836.67   |        |
| 1933 | 736.99 | 233.15538  |        |                                                                                            |            | ION=[M+H] <sup>+</sup>    | 1061.85     | 2099.83  | 938.17   | 2784.67  |        |
| 1934 | 738.25 | 865.33946  |        |                                                                                            |            | ION=[M+H+H] <sup>2+</sup> | 26836.92    | 9306.17  | 1099.50  | 3934.33  |        |
| 1935 | 738.37 | 453.2851   | 8.472  | Glycerophospho-N-palmitoyl ethanolamine                                                    | C21H44NO7P | ION=[M+H] <sup>+</sup>    | 6836.92     | 241.33   | 331.67   | 1046.00  |        |
| 1936 | 740.44 | 501.28513  |        |                                                                                            |            | ION=[M+H] <sup>+</sup>    | 0.00        | 0.00     | 7374.67  | 0.00     |        |
| 1937 | 740.68 | 245.0518   |        |                                                                                            |            | ION=[M+H] <sup>+</sup>    | 0.00        | 24159.00 | 124.67   | 0.00     |        |
| 1938 | 740.73 | 222.05774  |        |                                                                                            |            | ION=[M+H] <sup>+</sup>    | 16534.92    | 18894.17 | 6979.50  | 18422.33 |        |
| 1939 | 740.94 | 298.06351  |        |                                                                                            |            | ION=[M+H] <sup>+</sup>    | 3212.15     | 3689.50  | 1485.50  | 3906.00  |        |
| 1940 | 740.95 | 296.07549  |        |                                                                                            |            | ION=[M+H] <sup>+</sup>    | 9412.31     | 10626.33 | 3407.83  | 9957.00  |        |
| 1941 | 742.7  | 592.15164  |        |                                                                                            |            | ION=[M+H+H] <sup>2+</sup> | 50.00       | 0.00     | 675.00   | 0.00     |        |
| 1942 | 743.56 | 1244.64173 |        |                                                                                            |            | ION=[M+H+H] <sup>2+</sup> | 0.00        | 367.17   | 2569.00  | 0.00     |        |
| 1943 | 743.72 | 274.15488  |        |                                                                                            |            | ION=[M+H] <sup>+</sup>    | 1502.31     | 711.17   | 878.33   | 343.67   |        |
| 1944 | 743.97 | 621.81702  |        |                                                                                            |            | ION=[M+H] <sup>+</sup>    | 0.00        | 0.00     | 944.67   | 0.00     |        |
| 1945 | 744.04 | 1246.643   |        |                                                                                            |            | ION=[M+H+H] <sup>2+</sup> | 16.00       | 427.33   | 2719.17  | 0.00     |        |
| 1946 | 744.04 | 1243.6341  |        |                                                                                            |            | ION=[M+H+H] <sup>2+</sup> | 0.00        | 462.33   | 2211.50  | 0.00     |        |
| 1947 | 745    | 355.14911  |        |                                                                                            |            | ION=[M+H] <sup>+</sup>    | 1322.46     | 1482.33  | 1791.83  | 2254.00  |        |
| 1948 | 745.22 | 543.33283  |        |                                                                                            |            | ION=[M+H] <sup>+</sup>    | 12.92       | 0.00     | 2146.50  | 0.00     |        |
| 1949 | 745.4  | 1190.72332 | 17.991 | Desertomycin B                                                                             | C61H106O22 | ION=[M+H+H] <sup>2+</sup> | 56.46       | 2182.50  | 21864.83 | 0.00     |        |
| 1950 | 745.58 | 692.32436  |        |                                                                                            |            | ION=[M+H+H] <sup>2+</sup> | 84.31       | 1309.83  | 2988.33  | 0.00     |        |
| 1951 | 747.95 | 749.34611  |        |                                                                                            |            | ION=[M+H] <sup>+</sup>    | 14.15       | 12873.50 | 0.00     | 26.33    |        |
| 1952 | 751.02 | 1084.5412  |        |                                                                                            |            | ION=[M+H+H] <sup>2+</sup> | 1531.38     | 200.83   | 2310.83  | 3472.00  |        |
| 1953 | 751.77 | 570.22918  |        |                                                                                            |            | ION=[M+H+H] <sup>2+</sup> | 3894.77     | 1036.33  | 5732.50  | 6619.67  |        |
| 1954 | 751.89 | 260.21415  |        |                                                                                            |            | ION=[M+H] <sup>+</sup>    | 3897.54     | 829.00   | 5727.17  | 9020.00  |        |
| 1955 | 751.99 | 531.3409   | 6.63   | AAL Toxin Te1                                                                              | C27H49NO9  | ION=[M+H] <sup>+</sup>    | 9688.00     | 818.67   | 11165.33 | 15163.33 |        |
| 1956 | 752.3  | 567.22703  | 14.38  | Saframycin C                                                                               | C29H33N3O9 | ION=[M+H] <sup>+</sup>    | 2420.77     | 448.83   | 3254.17  | 4196.33  |        |
| 1957 | 753.04 | 391.18494  | 19.904 | Orysastrobins                                                                              | C18H25N5O5 | ION=[M+H+H] <sup>2+</sup> | 248593-16-0 | 779.85   | 2047.00  | 712.83   | 102.67 |
| 1958 | 753.18 | 1204.73601 |        |                                                                                            |            | ION=[M+H+H] <sup>2+</sup> | 0.00        | 1769.00  | 12024.33 | 0.00     |        |
| 1959 | 754.19 | 707.29671  |        |                                                                                            |            | ION=[M+H] <sup>+</sup>    | 2279.38     | 479.33   | 1966.83  | 4730.67  |        |
| 1960 | 754.21 | 552.25682  |        |                                                                                            |            | ION=[M+H+H] <sup>2+</sup> | 440.00      | 201.17   | 2939.33  | 0.00     |        |
| 1961 | 755.57 | 420.20853  |        |                                                                                            |            | ION=[M+H+H] <sup>2+</sup> | 0.00        | 0.00     | 156.50   | 1715.67  |        |
| 1962 | 756.19 | 671.41105  |        |                                                                                            |            | ION=[M+H] <sup>+</sup>    | 4791.08     | 351.67   | 2508.50  | 7206.33  |        |
| 1963 | 756.25 | 210.10387  | 7.615  | Dibutyl phosphate                                                                          | C8H19O4P   | ION=[M+H] <sup>+</sup>    | 8594.15     | 10012.83 | 7518.00  | 9331.33  |        |
| 1964 | 756.55 | 154.03973  | 5.744  | Diethyl phosphate                                                                          | C4H11O4P   | ION=[M+H] <sup>+</sup>    | 3022.62     | 3528.00  | 2672.17  | 4030.00  |        |
| 1965 | 757.18 | 913.31078  |        |                                                                                            |            | ION=[M+H+H] <sup>2+</sup> | 2550.46     | 1594.00  | 303.83   | 1387.67  |        |
| 1966 | 758.01 | 465.28678  |        |                                                                                            |            | ION=[M+H] <sup>+</sup>    | 1593.85     | 425.50   | 1053.33  | 3260.00  |        |
| 1967 | 763.94 | 528.25664  |        |                                                                                            |            | ION=[M+H+H] <sup>2+</sup> | 178.31      | 479.33   | 3277.83  | 0.00     |        |
| 1968 | 763.99 | 1284.01606 |        |                                                                                            |            | ION=[M+H] <sup>+</sup>    | 3691.38     | 2839.00  | 3871.83  | 233.00   |        |
| 1969 | 764.47 | 1284.67749 |        |                                                                                            |            | ION=[M+H] <sup>+</sup>    | 309.54      | 1458.50  | 888.17   | 233.67   |        |
| 1970 | 764.78 | 3851.0464  |        |                                                                                            |            | ION=[M+H+H] <sup>2+</sup> | 3666.46     | 2193.00  | 4224.83  | 60.67    |        |
| 1971 | 764.81 | 1284.34921 |        |                                                                                            |            | ION=[M+H] <sup>+</sup>    | 3578.62     | 3420.67  | 4876.33  | 277.67   |        |
| 1972 | 767.38 | 546.22825  |        |                                                                                            |            | ION=[M+H+H] <sup>2+</sup> | 2147.85     | 985.00   | 2355.67  | 3596.67  |        |
| 1973 | 768.44 | 564.24011  |        |                                                                                            |            | ION=[M+H+H] <sup>2+</sup> | 1914.15     | 1226.67  | 3281.00  | 3832.67  |        |
| 1974 | 768.56 | 192.15267  | 11.169 | 4-Heptylphenol                                                                             | C13H20O    | ION=[M+H] <sup>+</sup>    | 8260.31     | 2390.00  | 7039.17  | 12175.67 |        |
| 1975 | 768.92 | 576.45751  |        |                                                                                            |            | ION=[M+H+H] <sup>2+</sup> | 0.00        | 399.50   | 675.67   | 0.00     |        |
| 1976 | 769.18 | 849.34274  |        |                                                                                            |            | ION=[M+H+H] <sup>2+</sup> | 1657.54     | 518.83   | 395.17   | 817.00   |        |
| 1977 | 770.08 | 1026.66307 |        |                                                                                            |            | ION=[M+H+H] <sup>2+</sup> | 443.85      | 0.00     | 0.00     | 0.00     |        |
| 1978 | 771.55 | 1036.54073 |        |                                                                                            |            | ION=[M+H+H] <sup>2+</sup> | 1861.85     | 667.67   | 1811.67  | 6106.67  |        |
| 1979 | 771.79 | 507.33746  |        |                                                                                            |            | ION=[M+H] <sup>+</sup>    | 8699.85     | 2511.67  | 6516.83  | 19159.00 |        |
| 1980 | 772.29 | 572.26334  |        |                                                                                            |            | ION=[M+H] <sup>+</sup>    | 3928.92     | 853.83   | 14.67    | 0.00     |        |
| 1981 | 772.37 | 543.22596  |        |                                                                                            |            | ION=[M+H] <sup>+</sup>    | 2249.23     | 923.33   | 2183.83  | 5258.33  |        |
| 1982 | 772.99 | 199.19476  | 6.923  | Decanamide, N,N-dimethyl-                                                                  | C12H25NO   | ION=[M+H] <sup>+</sup>    | 8103.38     | 9573.00  | 6951.00  | 12701.67 |        |
| 1983 | 773.21 | 233.08534  |        |                                                                                            |            | ION=[M+H] <sup>+</sup>    | 49942.77    | 10278.17 | 13578.33 | 53870.67 |        |
| 1984 | 773.7  | 786.49907  |        |                                                                                            |            | ION=[M+H+H] <sup>2+</sup> | 1552.92     | 1205.83  | 3633.50  | 0.00     |        |
| 1985 | 775.13 | 663.45761  |        |                                                                                            |            | ION=[M+H] <sup>+</sup>    | 1812.62     | 612.00   | 337.00   | 2448.00  |        |



|      |        |            |        |                                                                                                   |             |                           |             |          |          |          |          |
|------|--------|------------|--------|---------------------------------------------------------------------------------------------------|-------------|---------------------------|-------------|----------|----------|----------|----------|
| 1986 | 776.72 | 170.09563  | 7.439  | Tetrahydrofurfuryl methacrylate                                                                   | C9H14O3     | ION=[M+H] <sup>+</sup>    |             | 4416.92  | 4903.83  | 4474.50  | 6984.00  |
| 1987 | 777.34 | 716.30794  |        |                                                                                                   |             | ION=[M+H] <sup>+</sup>    |             | 2845.08  | 756.83   | 0.00     | 440.00   |
| 1988 | 777.45 | 619.43082  | 22.358 | Dragonamide C                                                                                     | C33H57N5O6  | ION=[M+H] <sup>+</sup>    |             | 3018.62  | 1401.67  | 861.17   | 4429.00  |
| 1989 | 779.46 | 575.40383  |        |                                                                                                   |             | ION=[M+H] <sup>+</sup>    |             | 3932.62  | 1793.67  | 1063.50  | 6651.00  |
| 1990 | 779.84 | 634.50558  |        |                                                                                                   |             | ION=[M+H] <sup>+</sup>    |             | 9.85     | 213.33   | 2183.50  | 75.67    |
| 1991 | 780.16 | 195.58597  |        |                                                                                                   |             | ION=[M+H] <sup>+</sup>    |             | 3620.77  | 1785.67  | 2002.00  | 3150.33  |
| 1992 | 781.45 | 682.5134   |        |                                                                                                   |             | ION=[M+H+H] <sup>2+</sup> |             | 1837.85  | 707.83   | 1333.33  | 2232.33  |
| 1993 | 781.97 | 364.23871  | 44.452 | 2-acyloxyethylphosphonate                                                                         | C18H37O5P   | ION=[M+H] <sup>+</sup>    |             | 1094.31  | 1048.50  | 3498.00  | 3056.67  |
| 1994 | 782.63 | 531.37752  |        |                                                                                                   |             | ION=[M+H] <sup>+</sup>    |             | 4836.77  | 2061.50  | 1246.83  | 9145.33  |
| 1995 | 782.97 | 350.13997  |        |                                                                                                   |             | ION=[M+H] <sup>+</sup>    |             | 5987.54  | 4869.83  | 4975.33  | 3709.67  |
| 1996 | 783.38 | 347.1323   | 9.123  | N-Desmethyl ofloxacin                                                                             | C17H18FN3O4 | ION=[M+H] <sup>+</sup>    | 82419-52-1  | 5092.31  | 3265.00  | 2919.17  | 4048.33  |
| 1997 | 783.79 | 1274.64983 |        |                                                                                                   |             | ION=[M+H+H] <sup>2+</sup> |             | 8.15     | 68.50    | 789.50   | 4959.33  |
| 1998 | 783.84 | 391.17699  |        |                                                                                                   |             | ION=[M+H+H] <sup>2+</sup> |             | 3182.00  | 2650.33  | 2794.50  | 0.00     |
| 1999 | 784.36 | 626.38706  |        |                                                                                                   |             | ION=[M+H] <sup>+</sup>    |             | 1166.62  | 1139.50  | 1177.67  | 0.00     |
| 2000 | 784.86 | 1220.73116 |        |                                                                                                   |             | ION=[M+H+H] <sup>2+</sup> |             | 9.08     | 423.67   | 8443.67  | 39624.33 |
| 2001 | 785.02 | 644.36023  |        |                                                                                                   |             | ION=[M+H] <sup>+</sup>    |             | 7715.38  | 4022.00  | 2521.50  | 4524.33  |
| 2002 | 785.13 | 409.17511  |        |                                                                                                   |             | ION=[M+H+H] <sup>2+</sup> |             | 3229.69  | 2476.00  | 2065.83  | 1958.00  |
| 2003 | 785.13 | 414.18425  |        |                                                                                                   |             | ION=[M+H+H] <sup>2+</sup> |             | 3739.23  | 2890.50  | 2506.00  | 2306.00  |
| 2004 | 785.31 | 487.34966  |        |                                                                                                   |             | ION=[M+H] <sup>+</sup>    |             | 6359.38  | 2195.83  | 1012.50  | 12437.67 |
| 2005 | 785.35 | 605.33081  |        |                                                                                                   |             | ION=[M+H] <sup>+</sup>    |             | 3797.69  | 1411.00  | 1089.67  | 3133.67  |
| 2006 | 785.36 | 552.41819  | 5.757  | Merocyclophane A                                                                                  | C36H56O4    | ION=[M+H] <sup>+</sup>    |             | 14478.15 | 4870.50  | 2758.67  | 15528.00 |
| 2007 | 785.51 | 154.0995   | 6.373  | 2-Norbornaneacetic acid                                                                           | C9H14O2     | ION=[M+H] <sup>+</sup>    |             | 498.00   | 3871.00  | 297.33   | 489.67   |
| 2008 | 785.81 | 558.38832  | 19.964 | 2-(Tetradecanoylamino)-3-methylbutyric acid 2-deoxy-2-(butyrylamino)-alpha-D-glucopyranosyl ester | C29H54N2O8  | ION=[M+H] <sup>+</sup>    |             | 281.69   | 1626.50  | 68.67    | 127.00   |
| 2009 | 785.84 | 610.41839  |        |                                                                                                   |             | ION=[M+H] <sup>+</sup>    |             | 2076.00  | 1156.83  | 195.33   | 0.00     |
| 2010 | 786.13 | 593.44409  |        |                                                                                                   |             | ION=[M+H] <sup>+</sup>    |             | 3033.69  | 1010.00  | 386.83   | 3179.67  |
| 2011 | 787.7  | 443.32524  |        |                                                                                                   |             | ION=[M+H] <sup>+</sup>    |             | 8136.00  | 3142.17  | 1516.17  | 17071.33 |
| 2012 | 787.71 | 448.28007  | 16.016 | (E)-lowdenic acid                                                                                 | C26H40O6    | ION=[M+H] <sup>+</sup>    |             | 3442.46  | 2644.50  | 2449.17  | 4756.00  |
| 2013 | 789.24 | 664.39119  |        |                                                                                                   |             | ION=[M+H+H] <sup>2+</sup> |             | 418.92   | 0.00     | 0.00     | 0.00     |
| 2014 | 789.63 | 690.25838  |        |                                                                                                   |             | ION=[M+H] <sup>+</sup>    |             | 1259.69  | 190.33   | 0.00     | 22.67    |
| 2015 | 790.03 | 300.16963  | 18.221 | 3-amino-4-(5,8,11-trioxo-1-azatetradecan-1-yl)cyclobut-3-ene-1,2-dione                            | C14H24N2O5  | ION=[M+H] <sup>+</sup>    |             | 1674.15  | 776.17   | 1025.17  | 287.33   |
| 2016 | 790.65 | 399.29778  |        |                                                                                                   |             | ION=[M+H] <sup>+</sup>    |             | 6903.08  | 2801.83  | 1518.67  | 16832.67 |
| 2017 | 792.03 | 672.53186  |        |                                                                                                   |             | ION=[M+H+H] <sup>2+</sup> |             | 0.00     | 0.00     | 1031.67  | 0.00     |
| 2018 | 792.17 | 262.22924  | 13.277 | Phenol, 4-dodecyl-                                                                                | C18H30O     | ION=[M+H] <sup>+</sup>    |             | 4103.85  | 878.50   | 6384.50  | 9793.67  |
| 2019 | 792.56 | 628.37291  |        |                                                                                                   |             | ION=[M+H+H] <sup>2+</sup> |             | 141.38   | 496.67   | 837.00   | 0.00     |
| 2020 | 792.72 | 533.35632  |        |                                                                                                   |             | ION=[M+H] <sup>+</sup>    |             | 4167.54  | 472.83   | 5032.67  | 6589.67  |
| 2021 | 792.8  | 1234.7457  |        |                                                                                                   |             | ION=[M+H+H] <sup>2+</sup> |             | 0.00     | 189.83   | 4129.67  | 16444.67 |
| 2022 | 793.17 | 572.24584  |        |                                                                                                   |             | ION=[M+H+H] <sup>2+</sup> |             | 1663.38  | 614.50   | 4008.50  | 2896.00  |
| 2023 | 793.8  | 226.12115  | 18.429 | 1,4-Butanediol dimethacrylate                                                                     | C12H18O4    | ION=[M+H] <sup>+</sup>    | 2082-81-7   | 1415.23  | 1007.33  | 789.33   | 2941.00  |
| 2024 | 793.86 | 708.55403  |        |                                                                                                   |             | ION=[M+H+H] <sup>2+</sup> |             | 2939.23  | 0.00     | 0.00     | 0.00     |
| 2025 | 794.22 | 227.22581  |        |                                                                                                   |             | ION=[M+H] <sup>+</sup>    |             | 2147.23  | 2110.17  | 2182.83  | 0.00     |
| 2026 | 794.23 | 355.27304  | 19.337 | (Z)-N-16-hydroxyhexadec-9-enoyl-L-alanine methyl ester                                            | C20H37NO4   | ION=[M+H] <sup>+</sup>    |             | 4770.31  | 1532.83  | 2345.67  | 11691.33 |
| 2027 | 794.41 | 617.37118  |        |                                                                                                   |             | ION=[M+H] <sup>+</sup>    |             | 0.00     | 270.33   | 506.67   | 0.00     |
| 2028 | 794.78 | 686.2954   |        |                                                                                                   |             | ION=[M+H] <sup>+</sup>    |             | 1913.85  | 545.83   | 0.00     | 21.67    |
| 2029 | 795.25 | 218.16828  | 8.6    | Anaephene A                                                                                       | C15H22O     | ION=[M+H] <sup>+</sup>    |             | 5041.08  | 2623.00  | 2473.17  | 7894.00  |
| 2030 | 799.8  | 234.16126  |        |                                                                                                   |             | ION=[M+H] <sup>+</sup>    |             | 2486.62  | 2293.33  | 2174.17  | 3670.33  |
| 2031 | 801.12 | 501.32966  |        |                                                                                                   |             | ION=[M+H] <sup>+</sup>    |             | 921.85   | 346.33   | 140.33   | 1956.67  |
| 2032 | 801.55 | 521.34847  |        |                                                                                                   |             | ION=[M+H] <sup>+</sup>    |             | 5235.08  | 948.33   | 4185.00  | 4405.67  |
| 2033 | 802.97 | 162.0686   | 8.309  | 4-hydroxy-7-methyl-1-indanone                                                                     | C10H10O2    | ION=[M+H] <sup>+</sup>    |             | 11671.38 | 12398.17 | 12936.83 | 24899.67 |
| 2034 | 803.83 | 706.27851  |        |                                                                                                   |             | ION=[M+H] <sup>+</sup>    |             | 3474.00  | 4322.33  | 4077.50  | 8031.00  |
| 2035 | 804.05 | 359.17318  | 18.487 | 2-((2-[[[3R]-3-aminopiperidin-1-yl]-4-oxoquinolin-3(4h)-yl]methyl)benzoyl)benzoyl nitrile         | C21H21N5O   | ION=[M+H] <sup>+</sup>    | 940907-93-7 | 2364.46  | 2239.17  | 2770.33  | 4850.33  |
| 2036 | 805.71 | 680.53563  |        |                                                                                                   |             | ION=[M+H] <sup>+</sup>    |             | 2281.69  | 0.00     | 31.00    | 806.33   |
| 2037 | 809.8  | 296.03105  |        |                                                                                                   |             | ION=[M+H+H] <sup>2+</sup> |             | 19.69    | 1070.17  | 2153.50  | 0.00     |
| 2038 | 809.81 | 1218.75232 |        |                                                                                                   |             | ION=[M+H+H] <sup>2+</sup> |             | 0.00     | 266.33   | 4262.50  | 21125.33 |
| 2039 | 811.11 | 534.26433  | 17.571 | SB236057A                                                                                         | C33H34N4O3  | ION=[M+H] <sup>+</sup>    |             | 1122.62  | 523.33   | 151.67   | 152.33   |
| 2040 | 811.66 | 390.25491  |        |                                                                                                   |             | ION=[M+H] <sup>+</sup>    |             | 2139.38  | 1196.83  | 3742.33  | 4379.67  |
| 2041 | 811.67 | 408.16054  |        |                                                                                                   |             | ION=[M+H+H] <sup>2+</sup> |             | 9809.85  | 2453.83  | 4830.67  | 0.00     |
| 2042 | 812.83 | 148.01608  | 3.525  | 1,3-Isobenzofurandione                                                                            | C8H4O3      | ION=[M+H] <sup>+</sup>    |             | 8023.69  | 6261.33  | 6592.17  | 20035.33 |
| 2043 | 813.03 | 670.27042  |        |                                                                                                   |             | ION=[M+H] <sup>+</sup>    |             | 1476.31  | 222.00   | 49.67    | 185.00   |
| 2044 | 813.91 | 634.50426  |        |                                                                                                   |             | ION=[M+H] <sup>+</sup>    |             | 8.92     | 540.33   | 1725.33  | 0.00     |
| 2045 | 814.83 | 204.08026  | 4.1    | 7-formyl-3-methoxy-5-methylindanone                                                               | C12H12O3    | ION=[M+H] <sup>+</sup>    |             | 13118.00 | 14962.00 | 15858.33 | 34556.33 |
| 2046 | 815.29 | 672.28153  |        |                                                                                                   |             | ION=[M+H] <sup>+</sup>    |             | 13738.15 | 1377.00  | 48.50    | 684.67   |
| 2047 | 815.84 | 264.20959  | 13.768 | 1H-3a,7-Methanoazulen-6-ol, octahydro-3,6,8,8-tetramethyl-, 6-acetate, (3R,3aS,6R,7R,8aS)-        | C17H28O2    | ION=[M+H] <sup>+</sup>    |             | 3186.62  | 1647.17  | 2175.33  | 1761.33  |
| 2048 | 818.04 | 1232.77015 |        |                                                                                                   |             | ION=[M+H+H] <sup>2+</sup> |             | 0.00     | 110.33   | 1898.83  | 6425.33  |
| 2049 | 819.22 | 294.63691  |        |                                                                                                   |             | ION=[M+H] <sup>+</sup>    |             | 0.00     | 0.00     | 419.00   | 0.00     |
| 2050 | 819.72 | 352.1545   | 19.629 | 1,3-Dimethyl-N-[2-(1-pyrrolidinyl)-5-(trifluoromethyl)phenyl]-1H-pyrazole-5-carboxamide           | C17H19F3N4O | ION=[M+H] <sup>+</sup>    |             | 2950.15  | 2228.17  | 1878.00  | 1692.67  |

|      |        |            |        |                                                                                            |              |                            |           |          |           |           |
|------|--------|------------|--------|--------------------------------------------------------------------------------------------|--------------|----------------------------|-----------|----------|-----------|-----------|
| 2051 | 820.44 | 265.13494  | NA     | N-(2,6-Dimethylphenyl)-N-(methoxyacetyl) alanine                                           | C14H19NO4    | ION=[M+H] <sup>+</sup>     | 111.23    | 359.33   | 1915.83   | 0.00      |
| 2052 | 820.71 | 648.39268  |        |                                                                                            |              | ION=[M+H] <sup>+</sup>     | 3376.31   | 927.67   | 579.33    | 1061.67   |
| 2053 | 821.85 | 556.44953  |        |                                                                                            |              | ION=[M+H] <sup>+</sup>     | 4334.31   | 698.50   | 568.50    | 4588.33   |
| 2054 | 822.13 | 219.10579  | 5.607  | 1-Naphthalenamine, N-phenyl-                                                               | C16H13N      | ION=[M+H] <sup>+</sup>     | 187801.38 | 75593.50 | 145066.17 | 248251.33 |
| 2055 | 823.57 | 834.66933  |        |                                                                                            |              | ION=[M+H+H2] <sup>3+</sup> | 0.00      | 515.33   | 595.33    | 0.00      |
| 2056 | 824.38 | 498.23007  |        |                                                                                            |              | ION=[M+H+H] <sup>2+</sup>  | 0.00      | 0.00     | 0.00      | 1924.33   |
| 2057 | 825.56 | 249.11603  |        |                                                                                            |              | ION=[M+H] <sup>+</sup>     | 2867.69   | 1978.83  | 4542.33   | 11415.67  |
| 2058 | 826.94 | 1532.90662 |        |                                                                                            |              | ION=[M+H+H] <sup>2+</sup>  | 705.38    | 178.17   | 1698.00   | 3332.67   |
| 2059 | 827.43 | 222.05798  |        |                                                                                            |              | ION=[M+H] <sup>+</sup>     | 3911.23   | 4730.50  | 1340.17   | 4770.67   |
| 2060 | 827.44 | 296.07533  |        |                                                                                            |              | ION=[M+H] <sup>+</sup>     | 6137.08   | 7796.00  | 2159.83   | 6859.33   |
| 2061 | 827.93 | 166.04889  |        |                                                                                            |              | ION=[M+H] <sup>+</sup>     | 3144.15   | 3787.00  | 1051.67   | 4098.00   |
| 2062 | 828.52 | 509.35605  | 13.994 | Chrysosporide                                                                              | C26H47N5O5   | ION=[M+H] <sup>+</sup>     | 9423.38   | 1199.00  | 9352.83   | 17866.00  |
| 2063 | 831.85 | 343.27312  |        |                                                                                            |              | ION=[M+H] <sup>+</sup>     | 351.08    | 1387.83  | 0.00      | 1030.67   |
| 2064 | 834.86 | 642.26871  | 5.885  | 8-hydroxythiomarinol C                                                                     | C30H46N2O9S2 | ION=[M+H] <sup>+</sup>     | 2384.62   | 1038.50  | 69.50     | 488.67    |
| 2065 | 835.01 | 742.46876  |        |                                                                                            |              | ION=[M+H] <sup>+</sup>     | 2283.69   | 415.83   | 6280.00   | 3747.67   |
| 2066 | 837.12 | 731.54278  |        |                                                                                            |              | ION=[M+H] <sup>+</sup>     | 2771.54   | 473.83   | 248.00    | 348.67    |
| 2067 | 839.43 | 692.46785  | 37.776 | Veraguamide I                                                                              | C37H64N4O8   | ION=[M+H] <sup>+</sup>     | 1941.38   | 634.17   | 691.33    | 0.00      |
| 2068 | 840.04 | 522.406    |        |                                                                                            |              | ION=[M+H] <sup>+</sup>     | 0.00      | 0.00     | 0.00      | 4452.00   |
| 2069 | 840.23 | 687.51525  |        |                                                                                            |              | ION=[M+H] <sup>+</sup>     | 4614.62   | 323.17   | 260.50    | 526.33    |
| 2070 | 840.27 | 592.45809  |        |                                                                                            |              | ION=[M+H] <sup>+</sup>     | 1000.46   | 1065.83  | 1892.17   | 3292.33   |
| 2071 | 841.32 | 363.27733  | 18.997 | 11(12)-EET ethanolamide                                                                    | C22H37NO3    | ION=[M+H] <sup>+</sup>     | 24.31     | 19.17    | 1060.00   | 4074.33   |
| 2072 | 841.93 | 1296.88916 |        |                                                                                            |              | ION=[M+H+H] <sup>2+</sup>  | 768.92    | 214.67   | 272.33    | 0.00      |
| 2073 | 842.49 | 648.44161  |        |                                                                                            |              | ION=[M+H] <sup>+</sup>     | 2213.54   | 831.00   | 653.33    | 259.00    |
| 2074 | 843.02 | 643.48858  |        |                                                                                            |              | ION=[M+H] <sup>+</sup>     | 6350.62   | 330.00   | 315.50    | 341.33    |
| 2075 | 843.12 | 552.27557  |        |                                                                                            |              | ION=[M+H] <sup>+</sup>     | 982.77    | 223.67   | 0.00      | 25.33     |
| 2076 | 843.26 | 356.29227  | 5.906  | Octadec-9-en-1-yl 2,3-dihydroxypropanoate                                                  | C21H40O4     | ION=[M+H] <sup>+</sup>     | 4641.23   | 1463.33  | 7692.33   | 16064.67  |
| 2077 | 844.88 | 314.14949  | 18.276 | 2-(2-Hydroxy-2-propanyl)-9-(3-methyl-2-buten-1-yl)-2,3-dihydro-7H-furo[3,2-g]chromen-7-one | C19H22O4     | ION=[M+H] <sup>+</sup>     | 884.31    | 1763.83  | 2462.83   | 0.00      |
| 2078 | 845.77 | 604.41652  |        |                                                                                            |              | ION=[M+H] <sup>+</sup>     | 3276.46   | 857.67   | 991.83    | 333.33    |
| 2079 | 846.03 | 218.16872  | 9.358  | Anaephene A                                                                                | C15H22O      | ION=[M+H] <sup>+</sup>     | 2971.08   | 1620.83  | 3250.67   | 4812.67   |
| 2080 | 846.07 | 599.46144  |        |                                                                                            |              | ION=[M+H] <sup>+</sup>     | 8620.31   | 667.83   | 420.67    | 993.33    |
| 2081 | 846.5  | 338.24645  |        |                                                                                            |              | ION=[M+H] <sup>+</sup>     | 2213.85   | 2907.33  | 1389.67   | 3822.67   |
| 2082 | 849.26 | 555.43509  |        |                                                                                            |              | ION=[M+H] <sup>+</sup>     | 10747.54  | 647.00   | 596.50    | 1379.00   |
| 2083 | 849.61 | 796.51439  |        |                                                                                            |              | ION=[M+H] <sup>+</sup>     | 1206.77   | 554.50   | 2780.67   | 316.00    |
| 2084 | 850.5  | 267.07544  | 14.678 | Methyl(2-acetoxy-2-(2-carboxy-4-amino-phenyl))acetate                                      | C12H13NO6    | ION=[M+H] <sup>+</sup>     | 9055.85   | 9721.67  | 8991.33   | 14793.33  |
| 2085 | 850.97 | 340.20389  |        |                                                                                            |              | ION=[M+H] <sup>+</sup>     | 2401.38   | 869.50   | 2365.17   | 5782.00   |
| 2086 | 852.25 | 640.28037  |        |                                                                                            |              | ION=[M+H] <sup>+</sup>     | 1505.85   | 244.17   | 221.17    | 492.00    |
| 2087 | 852.67 | 511.4086   |        |                                                                                            |              | ION=[M+H] <sup>+</sup>     | 13175.69  | 711.17   | 613.50    | 1366.00   |
| 2088 | 854.23 | 656.28376  |        |                                                                                            |              | ION=[M+H] <sup>+</sup>     | 5928.46   | 683.00   | 0.00      | 331.00    |
| 2089 | 854.37 | 328.15222  | 19.528 | 3-hydroxy-3-((1,7,7-trimethyl-2-bicyclo[2.2.1]heptanyl)oxycarbonyl)pentanedioic acid       | C16H24O7     | ION=[M+H] <sup>+</sup>     | 1184.77   | 1092.17  | 1156.17   | 2352.00   |
| 2090 | 854.49 | 183.97814  |        |                                                                                            |              | ION=[M+H] <sup>+</sup>     | 3903.85   | 3960.17  | 3477.33   | 1464.00   |
| 2091 | 855.58 | 535.36295  |        |                                                                                            |              | ION=[M+H] <sup>+</sup>     | 1646.15   | 770.67   | 1638.50   | 1403.00   |
| 2092 | 856.58 | 668.28582  |        |                                                                                            |              | ION=[M+H] <sup>+</sup>     | 1852.31   | 276.50   | 60.67     | 103.67    |
| 2093 | 856.58 | 670.26928  |        |                                                                                            |              | ION=[M+H] <sup>+</sup>     | 2326.31   | 880.17   | 162.00    | 453.00    |
| 2094 | 856.91 | 467.38183  |        |                                                                                            |              | ION=[M+H] <sup>+</sup>     | 12808.46  | 631.50   | 615.67    | 1608.67   |
| 2095 | 860.73 | 423.35563  |        |                                                                                            |              | ION=[M+H] <sup>+</sup>     | 13319.54  | 700.33   | 723.00    | 1643.00   |
| 2096 | 861.48 | 598.41178  |        |                                                                                            |              | ION=[M+H] <sup>+</sup>     | 664.00    | 312.67   | 1995.33   | 1657.33   |
| 2097 | 865.51 | 379.32961  |        |                                                                                            |              | ION=[M+H] <sup>+</sup>     | 10824.46  | 662.83   | 585.00    | 1264.67   |
| 2098 | 866.72 | 582.42811  | 8.942  | Hericine D                                                                                 | C37H58O5     | ION=[M+H] <sup>+</sup>     | 1317.38   | 425.50   | 4499.50   | 3785.67   |
| 2099 | 867.89 | 336.2667   |        |                                                                                            |              | ION=[M+H] <sup>+</sup>     | 992.31    | 532.33   | 1995.50   | 647.33    |
| 2100 | 867.91 | 640.28697  |        |                                                                                            |              | ION=[M+H] <sup>+</sup>     | 2807.08   | 1256.33  | 1428.83   | 1570.67   |
| 2101 | 868.17 | 306.1132   |        |                                                                                            |              | ION=[M+H] <sup>+</sup>     | 2858.92   | 3969.50  | 1814.00   | 1884.00   |
| 2102 | 868.2  | 744.48499  |        |                                                                                            |              | ION=[M+H] <sup>+</sup>     | 3194.46   | 901.83   | 12006.67  | 9338.67   |
| 2103 | 868.33 | 312.26623  |        |                                                                                            |              | ION=[M+H] <sup>+</sup>     | 2072.77   | 1377.83  | 2787.67   | 593.00    |
| 2104 | 871.11 | 335.30382  |        |                                                                                            |              | ION=[M+H] <sup>+</sup>     | 6732.62   | 489.00   | 561.83    | 1188.67   |
| 2105 | 872.51 | 962.45616  |        |                                                                                            |              | ION=[M+H+H] <sup>2+</sup>  | 1611.54   | 342.33   | 3897.50   | 1362.67   |
| 2106 | 874.84 | 534.263    | 6.35   | SB236057A                                                                                  | C33H34N4O3   | ION=[M+H] <sup>+</sup>     | 79696.46  | 3396.17  | 14806.33  | 12275.33  |
| 2107 | 874.85 | 382.25055  | 13.156 | Anhydroophiobolin A                                                                        | C25H34O3     | ION=[M+H] <sup>+</sup>     | 2414.46   | 1971.50  | 8278.67   | 8332.00   |
| 2108 | 876.01 | 752.60303  |        |                                                                                            |              | ION=[M+H] <sup>+</sup>     | 0.00      | 2076.33  | 0.00      | 0.00      |
| 2109 | 876.25 | 642.5205   |        |                                                                                            |              | ION=[M+H] <sup>+</sup>     | 0.00      | 1865.67  | 528.33    | 0.00      |
| 2110 | 877.52 | 770.50119  |        |                                                                                            |              | ION=[M+H] <sup>+</sup>     | 2625.54   | 725.50   | 6563.67   | 7930.67   |
| 2111 | 881.11 | 284.15229  | 18.192 | Tropicamide                                                                                | C17H20N2O2   | ION=[M+H] <sup>+</sup>     | 3654.31   | 1246.67  | 251.33    | 1056.33   |
| 2112 | 881.49 | 292.24025  | 4.081  | 9(Z),11(E),13(E)-Octadecatrienoic Acid methyl ester                                        | C19H32O2     | ION=[M+H] <sup>+</sup>     | 16792.15  | 12477.00 | 12197.50  | 17753.00  |
| 2113 | 881.73 | 702.29243  |        |                                                                                            |              | ION=[M+H] <sup>+</sup>     | 1800.77   | 316.50   | 60.67     | 236.00    |
| 2114 | 883.14 | 756.34274  |        |                                                                                            |              | ION=[M+H+H] <sup>2+</sup>  | 890.77    | 65.67    | 2091.67   | 6458.67   |
| 2115 | 883.9  | 650.50063  |        |                                                                                            |              | ION=[M+H] <sup>+</sup>     | 0.00      | 4532.00  | 4581.83   | 139.33    |
| 2116 | 884.71 | 677.5015   |        |                                                                                            |              | ION=[M+H] <sup>+</sup>     | 129.85    | 1231.67  | 250.17    | 83.67     |
| 2117 | 891.21 | 830.44011  |        |                                                                                            |              | ION=[M+H+H] <sup>2+</sup>  | 2594.46   | 1333.00  | 4100.83   | 2733.67   |
| 2118 | 893.03 | 730.32239  |        |                                                                                            |              | ION=[M+H] <sup>+</sup>     | 1908.46   | 1054.33  | 32.00     | 371.67    |
| 2119 | 893.66 | 535.36374  |        |                                                                                            |              | ION=[M+H] <sup>+</sup>     | 970.46    | 20.83    | 2642.67   | 42.67     |

|      |        |            |        |                                                                           |              |                           |            |          |          |          |          |
|------|--------|------------|--------|---------------------------------------------------------------------------|--------------|---------------------------|------------|----------|----------|----------|----------|
| 2120 | 894.25 | 665.53531  |        |                                                                           |              | ION=[M+H] <sup>+</sup>    |            | 501.54   | 6842.00  | 1046.33  | 251.33   |
| 2121 | 894.74 | 658.26632  |        |                                                                           |              | ION=[M+H] <sup>+</sup>    |            | 3342.62  | 767.33   | 88.33    | 259.67   |
| 2122 | 896.39 | 791.55891  |        |                                                                           |              | ION=[M+H] <sup>+</sup>    |            | 1562.77  | 443.00   | 2042.83  | 1187.33  |
| 2123 | 900.52 | 166.04894  |        |                                                                           |              | ION=[M+H] <sup>+</sup>    |            | 1580.46  | 2120.33  | 518.83   | 2272.33  |
| 2124 | 900.9  | 370.09462  | 2.611  | Decamethylcyclopentasiloxane                                              | C10H30O5Si5  | ION=[M+H] <sup>+</sup>    | 541-02-6   | 2106.31  | 2998.83  | 796.17   | 3109.33  |
| 2125 | 900.9  | 462.12354  |        |                                                                           |              | ION=[M+H] <sup>+</sup>    |            | 5815.85  | 7916.33  | 2024.17  | 7545.00  |
| 2126 | 901.08 | 463.12335  |        |                                                                           |              | ION=[M+H] <sup>+</sup>    |            | 2706.62  | 3420.50  | 935.83   | 3638.67  |
| 2127 | 901.36 | 222.05791  |        |                                                                           |              | ION=[M+H] <sup>+</sup>    |            | 1752.92  | 2301.33  | 658.33   | 2506.00  |
| 2128 | 901.37 | 296.07541  |        |                                                                           |              | ION=[M+H] <sup>+</sup>    |            | 2470.15  | 3124.00  | 958.33   | 3832.33  |
| 2129 | 901.48 | 549.4103   |        |                                                                           |              | ION=[M+H] <sup>+</sup>    |            | 2224.92  | 1465.00  | 1831.83  | 0.00     |
| 2130 | 901.73 | 592.15329  |        |                                                                           |              | ION=[M+H+H] <sup>2+</sup> |            | 23.85    | 433.00   | 15.33    | 270.33   |
| 2131 | 902.34 | 670.29329  |        |                                                                           |              | ION=[M+H] <sup>+</sup>    |            | 1579.38  | 111.00   | 11.67    | 203.33   |
| 2132 | 902.37 | 458.43279  |        |                                                                           |              | ION=[M+H] <sup>+</sup>    |            | 527.85   | 695.83   | 451.67   | 2590.33  |
| 2133 | 903.18 | 714.29492  |        |                                                                           |              | ION=[M+H] <sup>+</sup>    |            | 4184.31  | 1732.50  | 79.33    | 1121.67  |
| 2134 | 903.6  | 746.50023  |        |                                                                           |              | ION=[M+H] <sup>+</sup>    |            | 1796.31  | 784.83   | 5020.33  | 5374.33  |
| 2135 | 903.79 | 584.4435   |        |                                                                           |              | ION=[M+H] <sup>+</sup>    |            | 1178.46  | 435.67   | 3316.17  | 3051.67  |
| 2136 | 904.82 | 279.25609  | 14.875 | (2E)-2-Decylidene-5-(dimethylaminomethyl)cyclopentan-1-one                | C18H33NO     | ION=[M+H] <sup>+</sup>    |            | 4290.46  | 4314.33  | 4594.33  | 5578.00  |
| 2137 | 906.54 | 851.50311  |        |                                                                           |              | ION=[M+H+H] <sup>2+</sup> |            | 1341.38  | 731.67   | 1347.83  | 250.67   |
| 2138 | 907.08 | 675.48347  |        |                                                                           |              | ION=[M+H] <sup>+</sup>    |            | 291.08   | 609.33   | 2549.67  | 284.00   |
| 2139 | 908.65 | 408.26513  | 19.378 | Carbobenzyloxy-(l)-leucynyl-(l)leucynyl methoxymethylketone               | C22H36N2O5   | ION=[M+H] <sup>+</sup>    |            | 3824.15  | 1944.83  | 8035.83  | 6799.67  |
| 2140 | 909.48 | 258.19829  | 5.548  | Cyclopenta[g]-2-benzopyran, 1,3,4,6,7,8-hexahydro-4,6,6,7,8,8-hexamethyl- | C18H26O      | ION=[M+H] <sup>+</sup>    |            | 13687.23 | 3502.00  | 14765.67 | 28510.33 |
| 2141 | 909.53 | 656.53559  |        |                                                                           |              | ION=[M+H] <sup>+</sup>    |            | 0.00     | 5870.17  | 1004.33  | 98.33    |
| 2142 | 909.86 | 964.46509  |        |                                                                           |              | ION=[M+H+H] <sup>2+</sup> |            | 1427.69  | 578.33   | 2824.00  | 1565.00  |
| 2143 | 910.24 | 609.17882  |        |                                                                           |              | ION=[M+H] <sup>+</sup>    |            | 2360.92  | 997.33   | 643.00   | 1205.67  |
| 2144 | 915.57 | 816.52608  |        |                                                                           |              | ION=[M+H+H] <sup>2+</sup> |            | 624.46   | 43.00    | 809.83   | 0.00     |
| 2145 | 916.55 | 308.12542  | 9.979  | 1-[6-(2-chloro-4-methoxyphenoxy)-hexyl]-imidazole                         | C16H21ClN2O2 | ION=[M+H] <sup>+</sup>    |            | 2651.23  | 2385.17  | 1317.50  | 1463.00  |
| 2146 | 916.57 | 419.32379  |        |                                                                           |              | ION=[M+H] <sup>+</sup>    |            | 1522.00  | 3504.67  | 594.33   | 4565.33  |
| 2147 | 916.83 | 424.2793   |        |                                                                           |              | ION=[M+H] <sup>+</sup>    |            | 3420.46  | 4214.83  | 1301.00  | 5842.33  |
| 2148 | 918.45 | 679.55146  |        |                                                                           |              | ION=[M+H] <sup>+</sup>    |            | 610.62   | 5707.00  | 1860.17  | 439.00   |
| 2149 | 919.24 | 610.46004  |        |                                                                           |              | ION=[M+H] <sup>+</sup>    |            | 1153.85  | 342.00   | 3586.67  | 4127.33  |
| 2150 | 919.26 | 586.27994  | 17.751 | Phycocerythrobilin                                                        | C33H38N4O6   | ION=[M+H] <sup>+</sup>    |            | 3018.00  | 1221.00  | 323.17   | 649.67   |
| 2151 | 919.32 | 671.52075  |        |                                                                           |              | ION=[M+H] <sup>+</sup>    |            | 2620.77  | 332.33   | 359.00   | 341.33   |
| 2152 | 919.93 | 772.51658  |        |                                                                           |              | ION=[M+H] <sup>+</sup>    |            | 1388.77  | 396.17   | 5651.67  | 6634.67  |
| 2153 | 920.41 | 335.31922  |        |                                                                           |              | ION=[M+H] <sup>+</sup>    |            | 2981.54  | 2554.67  | 2200.33  | 3178.00  |
| 2154 | 920.59 | 310.25071  |        |                                                                           |              | ION=[M+H] <sup>+</sup>    |            | 4822.15  | 5750.00  | 1404.50  | 2644.00  |
| 2155 | 920.74 | 269.2718   | 13.1   | Bacillamidin G                                                            | C17H35NO     | ION=[M+H] <sup>+</sup>    |            | 4180.62  | 4264.50  | 4015.83  | 667.67   |
| 2156 | 922.51 | 627.49231  |        |                                                                           |              | ION=[M+H] <sup>+</sup>    |            | 3836.31  | 431.00   | 456.00   | 763.67   |
| 2157 | 922.86 | 770.32177  |        |                                                                           |              | ION=[M+H+H] <sup>2+</sup> |            | 12931.23 | 473.17   | 27656.33 | 53325.67 |
| 2158 | 922.95 | 738.29571  |        |                                                                           |              | ION=[M+H+H] <sup>2+</sup> |            | 2935.69  | 77.50    | 5789.83  | 11485.33 |
| 2159 | 923.41 | 351.31338  |        |                                                                           |              | ION=[M+H] <sup>+</sup>    |            | 3635.08  | 4169.67  | 2799.17  | 3914.00  |
| 2160 | 923.74 | 405.2363   |        |                                                                           |              | ION=[M+H] <sup>+</sup>    |            | 0.00     | 1613.67  | 197.17   | 52.33    |
| 2161 | 925.69 | 364.23995  | 40.029 | 2-acyloxyethylphosphonate                                                 | C18H37O5P    | ION=[M+H] <sup>+</sup>    |            | 13809.23 | 3740.33  | 15918.00 | 37733.67 |
| 2162 | 925.93 | 591.49539  |        |                                                                           |              | ION=[M+H] <sup>+</sup>    |            | 4077.08  | 3653.00  | 8288.00  | 0.00     |
| 2163 | 926.28 | 990.48408  |        |                                                                           |              | ION=[M+H+H] <sup>2+</sup> |            | 1654.62  | 494.83   | 4179.00  | 2066.67  |
| 2164 | 926.52 | 583.46598  |        |                                                                           |              | ION=[M+H] <sup>+</sup>    |            | 4951.54  | 638.67   | 246.33   | 422.33   |
| 2165 | 927.1  | 1008.49136 |        |                                                                           |              | ION=[M+H+H] <sup>2+</sup> |            | 1868.92  | 520.17   | 4038.00  | 2197.00  |
| 2166 | 927.85 | 424.29712  |        |                                                                           |              | ION=[M+H] <sup>+</sup>    |            | 0.00     | 3434.50  | 0.00     | 81.67    |
| 2167 | 927.93 | 2314.56297 |        |                                                                           |              | ION=[M+H+H] <sup>2+</sup> |            | 680.31   | 274.17   | 448.00   | 0.00     |
| 2168 | 928    | 336.26414  |        |                                                                           |              | ION=[M+H] <sup>+</sup>    |            | 733.23   | 949.33   | 1820.00  | 1809.67  |
| 2169 | 930.31 | 544.39594  |        |                                                                           |              | ION=[M+H] <sup>+</sup>    |            | 2820.00  | 981.17   | 1059.33  | 536.33   |
| 2170 | 930.45 | 539.4395   |        |                                                                           |              | ION=[M+H] <sup>+</sup>    |            | 5702.46  | 615.83   | 552.17   | 888.00   |
| 2171 | 932.51 | 1294.87226 |        |                                                                           |              | ION=[M+H+H] <sup>2+</sup> |            | 730.77   | 366.00   | 617.83   | 464.67   |
| 2172 | 932.94 | 549.40987  |        |                                                                           |              | ION=[M+H] <sup>+</sup>    |            | 1970.92  | 1470.83  | 1845.00  | 0.00     |
| 2173 | 933.78 | 425.24404  |        |                                                                           |              | ION=[M+H] <sup>+</sup>    |            | 1655.54  | 1241.00  | 1430.33  | 0.00     |
| 2174 | 934.13 | 667.55062  |        |                                                                           |              | ION=[M+H] <sup>+</sup>    |            | 905.23   | 5289.67  | 559.83   | 0.00     |
| 2175 | 934.64 | 714.32824  |        |                                                                           |              | ION=[M+H] <sup>+</sup>    |            | 9511.69  | 6026.00  | 324.83   | 1596.67  |
| 2176 | 934.69 | 500.36929  |        |                                                                           |              | ION=[M+H] <sup>+</sup>    |            | 3724.31  | 1198.17  | 1193.00  | 780.00   |
| 2177 | 934.78 | 495.41229  |        |                                                                           |              | ION=[M+H] <sup>+</sup>    |            | 5490.77  | 643.50   | 508.83   | 1043.00  |
| 2178 | 935.31 | 614.27456  |        |                                                                           |              | ION=[M+H] <sup>+</sup>    |            | 7266.92  | 4556.50  | 121.83   | 488.67   |
| 2179 | 935.56 | 425.7501   |        |                                                                           |              | ION=[M+H] <sup>+</sup>    |            | 571.69   | 910.00   | 1520.17  | 691.67   |
| 2180 | 937.05 | 754.32787  |        |                                                                           |              | ION=[M+H+H] <sup>2+</sup> |            | 616.62   | 0.00     | 1766.67  | 5082.33  |
| 2181 | 937.96 | 970.50906  |        |                                                                           |              | ION=[M+H+H] <sup>2+</sup> |            | 1952.46  | 870.00   | 3179.00  | 165.00   |
| 2182 | 938.21 | 779.52081  |        |                                                                           |              | ION=[M+H] <sup>+</sup>    |            | 946.15   | 89.00    | 2248.50  | 1651.67  |
| 2183 | 939.32 | 456.34221  |        |                                                                           |              | ION=[M+H] <sup>+</sup>    |            | 4927.38  | 1356.67  | 1221.67  | 859.33   |
| 2184 | 939.34 | 451.38658  |        |                                                                           |              | ION=[M+H] <sup>+</sup>    |            | 5483.54  | 492.17   | 502.50   | 937.33   |
| 2185 | 939.76 | 1126.51758 |        |                                                                           |              | ION=[M+H+H] <sup>2+</sup> |            | 1747.23  | 979.00   | 2813.33  | 946.67   |
| 2186 | 940.69 | 532.24649  |        |                                                                           |              | ION=[M+H] <sup>+</sup>    |            | 1064.62  | 61.17    | 453.83   | 107.67   |
| 2187 | 940.99 | 434.06993  |        |                                                                           |              | ION=[M+H] <sup>+</sup>    |            | 1552.15  | 1989.33  | 809.17   | 682.67   |
| 2188 | 941.06 | 334.14463  | 18.296 | Combretastatin                                                            | C18H22O6     | ION=[M+H] <sup>+</sup>    | 82855-09-2 | 8677.54  | 10371.67 | 5968.83  | 5488.67  |
| 2189 | 942.1  | 800.39512  |        |                                                                           |              | ION=[M+H+H] <sup>2+</sup> |            | 2977.69  | 636.50   | 5687.50  | 2608.33  |



|      |        |            |        |                                                                                                                     |             |                              |             |           |          |          |           |
|------|--------|------------|--------|---------------------------------------------------------------------------------------------------------------------|-------------|------------------------------|-------------|-----------|----------|----------|-----------|
| 2190 | 942.15 | 278.22445  | 18.499 | Gamolenic acid                                                                                                      | C18H30O2    | ION=[M+H] <sup>+</sup>       | 506-26-3    | 6895.08   | 4646.00  | 5320.17  | 15266.67  |
| 2191 | 942.34 | 798.35262  |        |                                                                                                                     |             | ION=[M+H+H] <sup>2+</sup>    |             | 1336.31   | 96.00    | 5119.67  | 12726.00  |
| 2192 | 943.07 | 748.51307  |        |                                                                                                                     |             | ION=[M+H] <sup>+</sup>       |             | 995.23    | 342.83   | 2315.00  | 2386.67   |
| 2193 | 943.26 | 798.36576  |        |                                                                                                                     |             | ION=[M+H] <sup>+</sup>       |             | 150.46    | 0.00     | 1200.33  | 3242.33   |
| 2194 | 943.57 | 766.32678  |        |                                                                                                                     |             | ION=[M+H+H] <sup>2+</sup>    |             | 570.46    | 14.50    | 1764.33  | 3943.33   |
| 2195 | 944.48 | 407.36027  |        |                                                                                                                     |             | ION=[M+H] <sup>+</sup>       |             | 5106.15   | 399.83   | 431.00   | 840.00    |
| 2196 | 946.01 | 650.49549  |        |                                                                                                                     |             | ION=[M+H] <sup>+</sup>       |             | 0.00      | 905.17   | 453.17   | 0.00      |
| 2197 | 947.07 | 343.27241  |        |                                                                                                                     |             | ION=[M+H] <sup>+</sup>       |             | 1424.92   | 139.00   | 577.67   | 1400.00   |
| 2198 | 947.34 | 624.29507  | 13.919 | Methyl n-[1-((6-hydroxy-5-[n-(2-methylpropyl)4-aminobenzenesulfonamido]hexyl)carbamoyl)-2,2-diphenylethyl]carbamate | C33H44N4O6S | ION=[M+H] <sup>+</sup>       | 612547-11-2 | 15189.54  | 8817.67  | 681.50   | 2752.00   |
| 2199 | 947.67 | 589.4389   |        |                                                                                                                     |             | ION=[M+H] <sup>+</sup>       |             | 1702.92   | 274.17   | 252.67   | 277.33    |
| 2200 | 948.08 | 283.28734  | 12.034 | octadecanamide                                                                                                      | C18H37NO    | ION=[M+H] <sup>+</sup>       | 124-26-5    | 5162.92   | 5418.83  | 5505.67  | 9212.00   |
| 2201 | 948.17 | 582.42851  |        |                                                                                                                     |             | ION=[M+H] <sup>+</sup>       |             | 2944.92   | 509.33   | 8846.67  | 4641.33   |
| 2202 | 948.66 | 826.34684  |        |                                                                                                                     |             | ION=[M+H+H] <sup>2+</sup>    |             | 4810.77   | 285.83   | 10927.00 | 19843.00  |
| 2203 | 950.07 | 780.42672  |        |                                                                                                                     |             | ION=[M+H+H] <sup>2+</sup>    |             | 1205.85   | 191.33   | 713.33   | 0.00      |
| 2204 | 950.08 | 390.255    |        |                                                                                                                     |             | ION=[M+H] <sup>+</sup>       |             | 15821.38  | 4058.50  | 16409.83 | 39850.00  |
| 2205 | 950.11 | 826.35744  |        |                                                                                                                     |             | ION=[M+H] <sup>+</sup>       |             | 1017.08   | 41.67    | 1764.83  | 3408.67   |
| 2206 | 950.98 | 1064.67312 |        |                                                                                                                     |             | ION=[M+H+H] <sup>2+</sup>    |             | 1756.15   | 1692.00  | 1148.00  | 884.00    |
| 2207 | 951.24 | 363.33456  |        |                                                                                                                     |             | ION=[M+H] <sup>+</sup>       |             | 3478.46   | 441.33   | 299.50   | 780.67    |
| 2208 | 952.6  | 608.26501  |        |                                                                                                                     |             | ION=[M+H] <sup>+</sup>       |             | 4733.08   | 1013.50  | 2446.67  | 3700.00   |
| 2209 | 952.87 | 647.41874  |        |                                                                                                                     |             | ION=[M+H] <sup>+</sup>       |             | 400.77    | 4457.00  | 65.67    | 292.67    |
| 2210 | 953.53 | 640.2574   |        |                                                                                                                     |             | ION=[M+H] <sup>+</sup>       |             | 2269.38   | 369.00   | 1283.00  | 554.67    |
| 2211 | 953.82 | 656.24458  |        |                                                                                                                     |             | ION=[M+H] <sup>+</sup>       |             | 1736.31   | 974.00   | 0.00     | 53.33     |
| 2212 | 954.04 | 654.27416  |        |                                                                                                                     |             | ION=[M+H] <sup>+</sup>       |             | 6137.69   | 1302.50  | 731.17   | 5669.33   |
| 2213 | 954.8  | 773.25041  |        |                                                                                                                     |             | ION=[M+H] <sup>+</sup>       |             | 422.46    | 13.17    | 0.00     | 0.00      |
| 2214 | 956.49 | 255.2566   | 8.251  | Hexadecanamide                                                                                                      | C16H33NO    | ION=[M+H] <sup>+</sup>       |             | 12764.92  | 12211.83 | 13422.33 | 11984.33  |
| 2215 | 956.6  | 549.62173  |        |                                                                                                                     |             | ION=[M+H] <sup>+</sup>       |             | 332.46    | 1742.67  | 2109.67  | 0.00      |
| 2216 | 964.23 | 281.27153  | 12.538 | Elaidoylamide                                                                                                       | C18H35NO    | ION=[M+H] <sup>+</sup>       | 4303-70-2   | 48155.85  | 49317.83 | 47679.33 | 59464.00  |
| 2217 | 965.05 | 1134.58009 |        |                                                                                                                     |             | ION=[M+H+H] <sup>2+</sup>    |             | 1433.85   | 839.17   | 2228.67  | 0.00      |
| 2218 | 967.98 | 970.50879  |        |                                                                                                                     |             | ION=[M+H+H] <sup>2+</sup>    |             | 1999.38   | 3298.67  | 6662.50  | 1176.00   |
| 2219 | 32.94  | 175.96519  |        |                                                                                                                     |             | ION=[M-H2O+H] <sup>+</sup>   |             | 15259.85  | 14782.00 | 14200.83 | 11987.33  |
| 2220 | 33.24  | 203.96087  |        |                                                                                                                     |             | ION=[M-H2O+H] <sup>+</sup>   |             | 15312.77  | 14876.00 | 13579.50 | 10650.67  |
| 2221 | 35.38  | 253.94252  |        |                                                                                                                     |             | ION=[M+H] <sup>+</sup>       |             | 5274.62   | 4570.67  | 4641.83  | 1626.67   |
| 2222 | 36.42  | 181.97864  |        |                                                                                                                     |             | ION=[M+H] <sup>+</sup>       |             | 4404.46   | 4037.00  | 4933.83  | 1947.67   |
| 2223 | 34.05  | 158.95924  |        |                                                                                                                     |             | ION=[M+H] <sup>+</sup>       |             | 3166.77   | 2781.83  | 2972.83  | 1398.00   |
| 2224 | 36.14  | 140.95084  |        |                                                                                                                     |             | ION=[M+H] <sup>+</sup>       |             | 3054.92   | 3474.83  | 3533.33  | 1690.00   |
| 2225 | 39.38  | 357.3098   |        |                                                                                                                     |             | ION=[M+H+H] <sup>2+</sup>    |             | 0.00      | 39.50    | 44.33    | 4603.67   |
| 2226 | 38.81  | 293.2802   |        |                                                                                                                     |             | ION=[M+H+H] <sup>2+</sup>    |             | 0.00      | 0.00     | 5.33     | 136846.00 |
| 2227 | 40.68  | 297.11556  |        |                                                                                                                     |             | ION=[M+H+H] <sup>2+</sup>    |             | 3958.77   | 11348.17 | 0.00     | 0.00      |
| 2229 | 41.98  | 329.14244  |        |                                                                                                                     |             | ION=[M+H+H] <sup>2+</sup>    |             | 2777.08   | 6700.33  | 0.00     | 0.00      |
| 2230 | 40.12  | 343.29476  |        |                                                                                                                     |             | ION=[M+H] <sup>+</sup>       |             | 0.00      | 4046.17  | 0.00     | 0.00      |
| 2232 | 40.51  | 300.28661  |        |                                                                                                                     |             | ION=[M+H+H] <sup>2+</sup>    |             | 40.00     | 0.00     | 30830.67 | 27.00     |
| 2233 | 40.39  | 269.24347  |        |                                                                                                                     |             | ION=[M+H+H] <sup>2+</sup>    |             | 92.15     | 0.00     | 13004.50 | 0.00      |
| 2234 | 40.45  | 353.08582  |        |                                                                                                                     |             | ION=[M+H] <sup>+</sup>       |             | 1150.46   | 2885.67  | 0.00     | 19.67     |
| 2235 | 43.19  | 240.99318  |        |                                                                                                                     |             | ION=[M+H] <sup>+</sup>       |             | 7949.23   | 12373.83 | 17211.00 | 75.00     |
| 2236 | 43.25  | 128.04826  |        |                                                                                                                     |             | ION=[M+Na] <sup>+</sup>      |             | 4838.92   | 7121.67  | 8593.33  | 426.00    |
| 2237 | 44.21  | 215.94469  |        |                                                                                                                     |             | ION=[M+H] <sup>+</sup>       |             | 2192.15   | 1644.67  | 3039.83  | 0.00      |
| 2238 | 44.15  | 256.97061  |        |                                                                                                                     |             | ION=[M+H] <sup>+</sup>       |             | 3343.69   | 2398.00  | 5149.00  | 0.00      |
| 2239 | 42.29  | 168.03984  |        |                                                                                                                     |             | ION=[M+H] <sup>+</sup>       |             | 1955.85   | 2846.17  | 2955.67  | 98.33     |
| 2240 | 44.38  | 238.95935  |        |                                                                                                                     |             | ION=[M+H] <sup>+</sup>       |             | 1724.92   | 1470.67  | 2958.00  | 0.00      |
| 2241 | 44.11  | 272.94556  |        |                                                                                                                     |             | ION=[M+H] <sup>+</sup>       |             | 1622.15   | 1801.50  | 2074.50  | 12.67     |
| 2242 | 43.18  | 199.96667  |        |                                                                                                                     |             | ION=[M+H] <sup>+</sup>       |             | 696.46    | 1350.17  | 2001.67  | 0.00      |
| 2243 | 43.22  | 217.97732  |        |                                                                                                                     |             | ION=[M+H] <sup>+</sup>       |             | 1296.77   | 2092.50  | 2213.00  | 0.00      |
| 2244 | 41.65  | 334.2399   |        |                                                                                                                     |             | ION=[M+H+H] <sup>2+</sup>    |             | 234.62    | 0.00     | 7749.50  | 0.00      |
| 2245 | 43.85  | 269.2468   |        |                                                                                                                     |             | ION=[M+H] <sup>+</sup>       |             | 7.38      | 14.67    | 4399.00  | 430.67    |
| 2246 | 43     | 264.00996  |        |                                                                                                                     |             | ION=[M+H] <sup>+</sup>       |             | 2765.69   | 4914.17  | 6724.50  | 0.00      |
| 2247 | 44.2   | 831.38382  |        |                                                                                                                     |             | ION=[M+H+H] <sup>2+</sup> 3+ |             | 96.77     | 15130.50 | 1124.17  | 66.00     |
| 2248 | 44.07  | 342.32967  |        |                                                                                                                     |             | ION=[M+H+H] <sup>2+</sup> 3+ |             | 2528.31   | 0.00     | 20.67    | 89.33     |
| 2249 | 43.87  | 269.11319  |        |                                                                                                                     |             | ION=[M+H] <sup>+</sup>       |             | 1297.08   | 3369.83  | 16.17    | 46.00     |
| 2250 | 43.1   | 297.11673  |        |                                                                                                                     |             | ION=[M+H] <sup>+</sup>       |             | 1604.00   | 4543.67  | 0.00     | 0.00      |
| 2251 | 43.75  | 329.1446   |        |                                                                                                                     |             | ION=[M+H] <sup>+</sup>       |             | 2039.69   | 5646.83  | 16.67    | 7.67      |
| 2252 | 41.52  | 376.28733  |        |                                                                                                                     |             | ION=[M+H+H] <sup>2+</sup>    |             | 5747.85   | 0.00     | 47.33    | 0.00      |
| 2253 | 41.63  | 360.29147  |        |                                                                                                                     |             | ION=[M+H+H] <sup>2+</sup>    |             | 5940.92   | 0.00     | 138.83   | 0.00      |
| 2254 | 41.88  | 357.31049  |        |                                                                                                                     |             | ION=[M+H] <sup>+</sup>       |             | 0.00      | 1195.33  | 350.67   | 4698.33   |
| 2255 | 42.21  | 376.28894  |        |                                                                                                                     |             | ION=[M+H] <sup>+</sup>       |             | 17525.08  | 0.00     | 0.00     | 0.00      |
| 2256 | 42.63  | 334.24175  |        |                                                                                                                     |             | ION=[M+H] <sup>+</sup>       |             | 597.08    | 0.00     | 12774.67 | 304.67    |
| 2257 | 43.99  | 311.2913   |        |                                                                                                                     |             | ION=[M+H+H] <sup>2+</sup>    |             | 115775.38 | 29.83    | 2152.83  | 1124.67   |
| 2258 | 43.5   | 328.31827  |        |                                                                                                                     |             | ION=[M+H+H] <sup>2+</sup>    |             | 3370.92   | 0.00     | 5677.17  | 0.00      |
| 2259 | 44.31  | 342.33447  |        |                                                                                                                     |             | ION=[M+H+H] <sup>2+</sup>    |             | 183721.69 | 400.17   | 10534.17 | 501.67    |
| 2260 | 43.57  | 293.2831   |        |                                                                                                                     |             | ION=[M+H] <sup>+</sup>       |             | 0.00      | 0.00     | 0.00     | 666952.67 |
| 2261 | 42.77  | 291.26808  |        |                                                                                                                     |             | ION=[M+H] <sup>+</sup>       |             | 0.00      | 0.00     | 5.83     | 4863.33   |
| 2262 | 43.39  | 360.29266  |        |                                                                                                                     |             | ION=[M+H] <sup>+</sup>       |             | 9738.15   | 0.00     | 194.50   | 22.00     |



|      |       |           |       |                                                |            |                            |           |           |           |           |       |
|------|-------|-----------|-------|------------------------------------------------|------------|----------------------------|-----------|-----------|-----------|-----------|-------|
| 2263 | 45.2  | 225.22182 | 8.067 | N1-(2-amino-4-methylpentyl)octahydro-pyrrolo[1 | C13H27N3   | ION=[M+H] <sup>+</sup>     | 0.00      | 17.83     | 0.00      | 53524.67  |       |
| 2264 | 45.32 | 338.24492 |       |                                                |            | ION=[M+H] <sup>+</sup>     | 52.77     | 0.00      | 17025.33  | 0.00      |       |
| 2265 | 44.49 | 560.26314 |       |                                                |            | ION=[M+H+H2] <sup>3+</sup> | 158.00    | 7700.83   | 935.67    | 0.00      |       |
| 2266 | 44.4  | 831.38857 |       |                                                |            | ION=[M+H+H] <sup>2+</sup>  | 48.92     | 3482.00   | 337.00    | 18.33     |       |
| 2267 | 44.9  | 560.2615  |       |                                                |            | ION=[M+H+H] <sup>2+</sup>  | 0.00      | 7986.67   | 471.17    | 0.00      |       |
| 2268 | 43.6  | 514.25821 |       |                                                |            | ION=[M+H+H2] <sup>3+</sup> | 0.00      | 1159.17   | 0.00      | 0.00      |       |
| 2269 | 44.11 | 231.92133 |       |                                                |            | ION=[M+H] <sup>+</sup>     | 1306.46   | 662.33    | 1009.33   | 0.00      |       |
| 2270 | 43.82 | 124.97813 |       |                                                |            | ION=[M+H] <sup>+</sup>     | 2982.46   | 2158.83   | 3241.00   | 29.67     |       |
| 2271 | 43.99 | 315.26478 |       |                                                |            | ION=[M+H] <sup>+</sup>     | 0.00      | 0.00      | 0.00      | 6407.33   |       |
| 2272 | 44.4  | 239.23729 |       |                                                |            | ION=[M+H] <sup>+</sup>     | 0.00      | 11.67     | 0.00      | 5466.00   |       |
| 2273 | 46.31 | 342.33567 |       |                                                |            | ION=[M+H] <sup>+</sup>     | 443444.00 | 760.50    | 23098.33  | 1833.33   |       |
| 2274 | 45.92 | 328.3204  |       |                                                |            | ION=[M+H] <sup>+</sup>     | 15571.85  | 109.33    | 29905.67  | 19.67     |       |
| 2275 | 45.95 | 309.27876 |       |                                                |            | ION=[M+H] <sup>+</sup>     | 41.08     | 5.83      | 3.17      | 7545.00   |       |
| 2276 | 44.11 | 233.95491 |       |                                                |            | ION=[M+H] <sup>+</sup>     | 482.15    | 0.00      | 900.83    | 0.00      |       |
| 2277 | 44.4  | 280.17726 | NA    | Mefexamide                                     | C15H24N2O3 | ION=[M+H] <sup>+</sup>     | 1227-61-8 | 0.00      | 1821.67   | 132.83    | 20.33 |
| 2278 | 44.7  | 322.27105 |       |                                                |            | ION=[M+H] <sup>+</sup>     | 0.00      | 0.00      | 20501.50  | 0.00      |       |
| 2279 | 45.09 | 319.86132 |       |                                                |            | ION=[M+H] <sup>+</sup>     | 4447.08   | 5316.83   | 6278.50   | 2393.67   |       |
| 2280 | 47.35 | 300.2884  |       |                                                |            | ION=[M+H] <sup>+</sup>     | 1744.31   | 59.33     | 472928.67 | 118.00    |       |
| 2281 | 47.57 | 407.91182 |       |                                                |            | ION=[M+H] <sup>+</sup>     | 740.77    | 1786.83   | 1176.83   | 0.00      |       |
| 2282 | 46.53 | 257.24694 |       |                                                |            | ION=[M+H] <sup>+</sup>     | 83630.31  | 25031.50  | 4658.33   | 1501.33   |       |
| 2283 | 47.17 | 271.93695 |       |                                                |            | ION=[M+H] <sup>+</sup>     | 2199.54   | 4070.17   | 3356.50   | 157.00    |       |
| 2284 | 49    | 203.96334 |       |                                                |            | ION=[M+K] <sup>+</sup>     | 10596.15  | 18474.50  | 22087.67  | 9177.67   |       |
| 2285 | 48.38 | 265.93178 |       |                                                |            | ION=[M+Na] <sup>+</sup>    | 5057.38   | 7016.83   | 7600.33   | 447.67    |       |
| 2286 | 48.62 | 135.97449 |       |                                                |            | ION=[M+Na] <sup>+</sup>    | 2310.92   | 3645.67   | 3693.00   | 174.00    |       |
| 2287 | 49    | 355.91154 |       |                                                |            | ION=[M+Na] <sup>+</sup>    | 1714.15   | 3421.83   | 3362.17   | 639.67    |       |
| 2288 | 48.99 | 423.89913 |       |                                                |            | ION=[M+Na] <sup>+</sup>    | 1587.08   | 3694.83   | 2964.83   | 83.67     |       |
| 2289 | 48.46 | 401.90592 |       |                                                |            | ION=[M+Na] <sup>+</sup>    | 1906.92   | 3441.17   | 2938.67   | 20.00     |       |
| 2290 | 49.18 | 491.88643 |       |                                                |            | ION=[M+Na] <sup>+</sup>    | 997.38    | 2243.17   | 1553.33   | 0.00      |       |
| 2291 | 48.09 | 469.8942  |       |                                                |            | ION=[M+Na] <sup>+</sup>    | 940.92    | 2067.67   | 1681.17   | 0.00      |       |
| 2292 | 48.44 | 537.88163 |       |                                                |            | ION=[M+K] <sup>+</sup>     | 973.08    | 1765.50   | 1969.50   | 0.00      |       |
| 2293 | 48.98 | 559.87508 |       |                                                |            | ION=[M+Na] <sup>+</sup>    | 847.85    | 2028.17   | 1233.00   | 0.00      |       |
| 2294 | 48.84 | 605.86853 |       |                                                |            | ION=[M+K] <sup>+</sup>     | 993.38    | 1594.67   | 1795.33   | 0.00      |       |
| 2295 | 49.57 | 627.86186 |       |                                                |            | ION=[M+K] <sup>+</sup>     | 652.77    | 1503.50   | 1382.00   | 0.00      |       |
| 2296 | 48.28 | 455.83646 |       |                                                |            | ION=[M+H] <sup>+</sup>     | 1299.85   | 1604.00   | 2919.00   | 585.67    |       |
| 2297 | 48.61 | 361.91857 |       |                                                |            | ION=[M+H] <sup>+</sup>     | 902.00    | 2242.00   | 1217.33   | 0.00      |       |
| 2298 | 48.42 | 429.90623 |       |                                                |            | ION=[M+H] <sup>+</sup>     | 1063.23   | 2369.33   | 1184.67   | 0.00      |       |
| 2299 | 50.48 | 309.90462 |       |                                                |            | ION=[M+H] <sup>+</sup>     | 777.23    | 1531.00   | 1665.33   | 607.33    |       |
| 2300 | 48.83 | 355.90057 |       |                                                |            | ION=[M+H] <sup>+</sup>     | 1380.15   | 2552.17   | 2521.00   | 62.33     |       |
| 2301 | 48.44 | 371.87576 |       |                                                |            | ION=[M+H] <sup>+</sup>     | 1308.62   | 1912.17   | 2633.17   | 445.33    |       |
| 2302 | 47.63 | 560.26688 |       |                                                |            | ION=[M+H] <sup>+</sup>     | 0.00      | 1962.67   | 336.00    | 0.00      |       |
| 2303 | 48.03 | 945.5674  |       |                                                |            | ION=[M+H] <sup>+</sup>     | 1259.08   | 3948.00   | 315.50    | 978.67    |       |
| 2304 | 48.6  | 797.69888 |       |                                                |            | ION=[M+H] <sup>+</sup>     | 531.23    | 0.00      | 3543.00   | 6091.33   |       |
| 2305 | 48.7  | 713.73901 |       |                                                |            | ION=[M+H] <sup>+</sup>     | 774.77    | 0.00      | 3255.50   | 5696.33   |       |
| 2306 | 48.81 | 645.75393 |       |                                                |            | ION=[M+H] <sup>+</sup>     | 2438.46   | 1242.50   | 5295.33   | 9675.33   |       |
| 2307 | 48.92 | 729.71456 |       |                                                |            | ION=[M+H] <sup>+</sup>     | 2729.54   | 756.67    | 5485.33   | 9847.00   |       |
| 2308 | 49.14 | 897.63993 |       |                                                |            | ION=[M+H] <sup>+</sup>     | 2452.00   | 235.17    | 3495.83   | 7079.00   |       |
| 2309 | 49.38 | 577.76572 |       |                                                |            | ION=[M+H] <sup>+</sup>     | 4836.46   | 3318.17   | 7496.33   | 13982.33  |       |
| 2310 | 49.77 | 257.89253 |       |                                                |            | ION=[M+H] <sup>+</sup>     | 16780.77  | 17356.50  | 34675.00  | 40136.67  |       |
| 2311 | 49.17 | 409.84143 |       |                                                |            | ION=[M+H] <sup>+</sup>     | 3558.00   | 2843.00   | 8491.67   | 12072.33  |       |
| 2312 | 49.66 | 493.80318 |       |                                                |            | ION=[M+H] <sup>+</sup>     | 5638.62   | 3575.67   | 11025.33  | 19040.00  |       |
| 2313 | 49.22 | 881.66211 |       |                                                |            | ION=[M+H] <sup>+</sup>     | 650.00    | 0.00      | 3064.50   | 5714.33   |       |
| 2314 | 49.33 | 813.67569 |       |                                                |            | ION=[M+H] <sup>+</sup>     | 2162.00   | 37.67     | 4580.50   | 8578.67   |       |
| 2315 | 49.34 | 913.6142  |       |                                                |            | ION=[M+H] <sup>+</sup>     | 3432.92   | 1598.50   | 3112.83   | 6291.00   |       |
| 2316 | 49.36 | 477.82917 |       |                                                |            | ION=[M+H] <sup>+</sup>     | 2028.62   | 1778.83   | 6568.67   | 7424.33   |       |
| 2317 | 49.6  | 745.68931 |       |                                                |            | ION=[M+H] <sup>+</sup>     | 5109.23   | 4114.50   | 6283.50   | 12670.67  |       |
| 2318 | 49.38 | 981.60142 |       |                                                |            | ION=[M+H] <sup>+</sup>     | 583.08    | 277.67    | 2235.33   | 5027.33   |       |
| 2319 | 49.38 | 561.79156 |       |                                                |            | ION=[M+H] <sup>+</sup>     | 1767.23   | 1019.00   | 5277.67   | 8047.33   |       |
| 2320 | 49.88 | 503.76952 |       |                                                |            | ION=[M+Na] <sup>+</sup>    | 18462.46  | 24581.17  | 11329.67  | 24427.33  |       |
| 2321 | 49.75 | 419.80732 |       |                                                |            | ION=[M+Na] <sup>+</sup>    | 15876.00  | 19225.33  | 11329.33  | 24976.00  |       |
| 2322 | 49.88 | 335.84622 |       |                                                |            | ION=[M+Na] <sup>+</sup>    | 12864.31  | 14875.67  | 11278.83  | 22511.67  |       |
| 2323 | 49.65 | 655.72114 |       |                                                |            | ION=[M+Na] <sup>+</sup>    | 8140.31   | 8796.67   | 6635.67   | 13854.67  |       |
| 2324 | 50.09 | 587.73241 |       |                                                |            | ION=[M+Na] <sup>+</sup>    | 8342.31   | 12378.33  | 4477.83   | 10084.67  |       |
| 2325 | 51.95 | 370.36723 |       |                                                |            | ION=[M+H] <sup>+</sup>     | 0.00      | 14371.17  | 0.00      | 0.00      |       |
| 2326 | 51.5  | 376.31668 |       |                                                |            | ION=[M+H] <sup>+</sup>     | 22821.23  | 1854.00   | 0.00      | 0.00      |       |
| 2327 | 49.85 | 929.59032 |       |                                                |            | ION=[M+H] <sup>+</sup>     | 3362.46   | 4126.83   | 1581.67   | 4073.00   |       |
| 2328 | 49.88 | 289.84007 |       |                                                |            | ION=[M+H] <sup>+</sup>     | 76427.85  | 103747.83 | 50565.00  | 108318.00 |       |
| 2329 | 50.06 | 845.62789 |       |                                                |            | ION=[M+H] <sup>+</sup>     | 4856.31   | 5889.67   | 3107.17   | 6690.67   |       |
| 2330 | 49.47 | 793.61511 |       |                                                |            | ION=[M+H] <sup>+</sup>     | 881.08    | 3817.33   | 184.33    | 717.67    |       |
| 2331 | 49.95 | 167.92409 |       |                                                |            | ION=[M+K] <sup>+</sup>     | 49384.77  | 66322.17  | 32905.17  | 67821.67  |       |
| 2332 | 49.83 | 739.68374 |       |                                                |            | ION=[M+Na] <sup>+</sup>    | 6699.54   | 7445.67   | 4606.33   | 9762.67   |       |
| 2333 | 49.79 | 661.72791 |       |                                                |            | ION=[M+H] <sup>+</sup>     | 5515.38   | 4059.50   | 7624.33   | 14451.33  |       |
| 2334 | 50.31 | 709.65207 |       |                                                |            | ION=[M+H] <sup>+</sup>     | 2761.38   | 5662.33   | 690.50    | 2011.00   |       |
| 2335 | 50    | 629.77882 |       |                                                |            | ION=[M+H] <sup>+</sup>     | 778.31    | 64.33     | 2970.83   | 4472.67   |       |

|      |       |           |        |                                                                         |             |                           |             |          |          |          |           |
|------|-------|-----------|--------|-------------------------------------------------------------------------|-------------|---------------------------|-------------|----------|----------|----------|-----------|
| 2336 | 50.08 | 861.60217 |        |                                                                         |             | ION=[M+H] <sup>+</sup>    |             | 3295.08  | 5724.67  | 544.17   | 1666.33   |
| 2337 | 49.67 | 341.85421 |        |                                                                         |             | ION=[M+H] <sup>+</sup>    |             | 5124.92  | 3950.17  | 7699.67  | 12868.00  |
| 2338 | 49.8  | 965.62283 |        |                                                                         |             | ION=[M+H] <sup>+</sup>    |             | 366.31   | 0.00     | 2587.00  | 4822.33   |
| 2339 | 50.02 | 425.81541 |        |                                                                         |             | ION=[M+H] <sup>+</sup>    |             | 10089.38 | 8284.83  | 12541.50 | 25134.33  |
| 2340 | 49.78 | 273.86616 |        |                                                                         |             | ION=[M+H] <sup>+</sup>    |             | 50890.92 | 50801.67 | 58947.83 | 104341.67 |
| 2341 | 49.62 | 829.65188 |        |                                                                         |             | ION=[M+H] <sup>+</sup>    |             | 4298.46  | 3727.17  | 4758.83  | 9456.00   |
| 2342 | 49.95 | 509.77731 |        |                                                                         |             | ION=[M+H] <sup>+</sup>    |             | 13123.54 | 12002.00 | 14335.33 | 29027.67  |
| 2343 | 49.85 | 593.73992 |        |                                                                         |             | ION=[M+H] <sup>+</sup>    |             | 8372.62  | 8143.17  | 7142.67  | 15386.00  |
| 2344 | 51.41 | 539.18252 |        |                                                                         |             | ION=[M+H] <sup>+</sup>    |             | 803.69   | 3919.83  | 3344.50  | 712.33    |
| 2345 | 51.61 | 376.31676 |        |                                                                         |             | ION=[M+H+H] <sup>2+</sup> |             | 9070.62  | 1502.17  | 317.83   | 648.00    |
| 2346 | 52.98 | 404.35099 |        |                                                                         |             | ION=[M+H+H] <sup>2+</sup> |             | 0.00     | 64675.50 | 52.50    | 39.67     |
| 2347 | 52.8  | 390.33534 |        |                                                                         |             | ION=[M+H] <sup>+</sup>    |             | 14.62    | 28690.67 | 38.00    | 24.00     |
| 2348 | 52.71 | 476.30193 |        |                                                                         |             | ION=[M+H] <sup>+</sup>    |             | 18036.31 | 0.00     | 0.00     | 0.00      |
| 2349 | 52.43 | 356.35134 |        |                                                                         |             | ION=[M+H] <sup>+</sup>    |             | 1611.08  | 4863.83  | 0.00     | 0.00      |
| 2350 | 54.77 | 244.94779 |        |                                                                         |             | ION=[M+H] <sup>+</sup>    |             | 1760.00  | 1029.83  | 3502.67  | 4638.67   |
| 2351 | 52.86 | 305.24673 |        |                                                                         |             | ION=[M+H] <sup>+</sup>    |             | 0.00     | 13175.50 | 18.50    | 237.33    |
| 2352 | 52.96 | 205.13303 | 5.879  | Trapidil                                                                | C10H15N5    | ION=[M+H] <sup>+</sup>    | 15421-84-8  | 0.00     | 15570.33 | 0.00     | 305.33    |
| 2353 | 52.88 | 243.23145 |        |                                                                         |             | ION=[M+H] <sup>+</sup>    |             | 437.54   | 3271.33  | 838.50   | 882.33    |
| 2354 | 53.35 | 390.17344 |        |                                                                         |             | ION=[M+Na] <sup>+</sup>   |             | 3147.23  | 3075.67  | 4572.67  | 2125.00   |
| 2355 | 51.89 | 254.13843 | 8.775  | Pimondazole                                                             | C11H18N4O3  | ION=[M+H] <sup>+</sup>    | 70132-50-2  | 999.85   | 0.00     | 4188.50  | 1218.67   |
| 2356 | 52.05 | 370.36639 |        |                                                                         |             | ION=[M+H+H] <sup>2+</sup> |             | 0.00     | 12524.50 | 0.00     | 0.00      |
| 2357 | 53.61 | 928.28501 |        |                                                                         |             | ION=[M+H+H] <sup>2+</sup> |             | 2098.77  | 1794.83  | 3915.33  | 216.67    |
| 2358 | 53.79 | 928.29112 |        |                                                                         |             | ION=[M+H+H] <sup>2+</sup> |             | 2893.54  | 2231.33  | 6400.33  | 984.33    |
| 2359 | 54.39 | 675.28802 |        |                                                                         |             | ION=[M+H+H] <sup>2+</sup> |             | 106.15   | 2835.50  | 802.00   | 0.00      |
| 2360 | 54.03 | 675.29021 |        |                                                                         |             | ION=[M+H+H] <sup>2+</sup> |             | 0.00     | 1475.33  | 418.67   | 0.00      |
| 2361 | 54.44 | 172.08141 | NA     | Glycylproline                                                           | C7H12N2O3   | ION=[M+H] <sup>+</sup>    |             | 391.23   | 1148.00  | 0.00     | 25.00     |
| 2362 | 54.45 | 578.27559 |        |                                                                         |             | ION=[M+H+H] <sup>2+</sup> |             | 592.15   | 580.00   | 921.67   | 0.00      |
| 2363 | 54.97 | 659.37042 |        |                                                                         |             | ION=[M+H] <sup>+</sup>    |             | 0.00     | 0.00     | 0.00     | 11738.67  |
| 2364 | 55.28 | 185.01085 |        |                                                                         |             | ION=[M+K] <sup>+</sup>    |             | 3113.54  | 2338.17  | 5670.17  | 7676.33   |
| 2365 | 55.05 | 420.34624 |        |                                                                         |             | ION=[M+H] <sup>+</sup>    |             | 0.00     | 5382.83  | 0.00     | 0.00      |
| 2366 | 55.39 | 393.29991 |        |                                                                         |             | ION=[M+H] <sup>+</sup>    |             | 0.00     | 21.33    | 4.17     | 4784.00   |
| 2367 | 55.15 | 659.36328 |        |                                                                         |             | ION=[M+H+H] <sup>2+</sup> |             | 5.38     | 10.67    | 0.00     | 84568.67  |
| 2368 | 55.21 | 517.20117 |        |                                                                         |             | ION=[M+H] <sup>+</sup>    |             | 4979.08  | 18916.83 | 16882.00 | 6036.67   |
| 2369 | 55.25 | 217.11197 | NA     | Glutethimide                                                            | C13H15NO2   | ION=[M+H] <sup>+</sup>    | 77-21-4     | 3121.38  | 1073.67  | 1803.50  | 868.33    |
| 2370 | 56.76 | 461.21168 |        |                                                                         |             | ION=[M+H] <sup>+</sup>    |             | 2416.92  | 2844.17  | 2882.83  | 8064.67   |
| 2371 | 55.89 | 514.12043 |        |                                                                         |             | ION=[M+H] <sup>+</sup>    |             | 1349.85  | 210.00   | 1525.67  | 3931.00   |
| 2372 | 55.3  | 187.12121 |        |                                                                         |             | ION=[M+H] <sup>+</sup>    |             | 68.77    | 44.50    | 20.50    | 15361.00  |
| 2373 | 55.3  | 659.3634  |        |                                                                         |             | ION=[M+H+H] <sup>2+</sup> |             | 0.00     | 0.00     | 0.00     | 44835.67  |
| 2374 | 55.58 | 256.04758 | NA     | 3-Hydroxy-1-[3-(trifluoromethyl)phenyl]pyrazin-2(1H)-one                | C11H7F3N2O2 | ION=[M+H] <sup>+</sup>    |             | 2290.46  | 157.83   | 1899.83  | 3395.33   |
| 2375 | 56.14 | 204.07806 | NA     | 7-formyl-3-methoxy-5-methylindanone                                     | C12H12O3    | ION=[M+H] <sup>+</sup>    |             | 2244.15  | 1447.17  | 1240.00  | 219.33    |
| 2376 | 55.83 | 111.04273 | 11.121 | Imexon                                                                  | C4H5N3O     | ION=[M+H] <sup>+</sup>    | 59643-91-3  | 235.23   | 891.83   | 88.67    | 70.00     |
| 2377 | 56.33 | 390.17422 | 5.078  | AS-I toxin                                                              | C15H26N4O8  | ION=[M+H+H] <sup>2+</sup> |             | 30411.85 | 30178.33 | 41851.67 | 16302.33  |
| 2378 | 55.35 | 833.37155 |        |                                                                         |             | ION=[M+H+H] <sup>2+</sup> |             | 1572.77  | 941.17   | 4624.17  | 2027.00   |
| 2379 | 55.35 | 833.36722 |        |                                                                         |             | ION=[M+H+H] <sup>2+</sup> |             | 1012.77  | 1692.67  | 6124.50  | 2067.33   |
| 2380 | 55.62 | 390.1751  | 6.709  | AS-I toxin                                                              | C15H26N4O8  | ION=[M+H] <sup>+</sup>    |             | 16266.31 | 12725.83 | 21207.50 | 17211.33  |
| 2381 | 56.3  | 190.09755 | 3.436  | Dicyclanil                                                              | C8H10N6     | ION=[M+H] <sup>+</sup>    | 112636-83-6 | 16409.23 | 6915.00  | 11160.67 | 4926.33   |
| 2382 | 56.02 | 386.15578 |        |                                                                         |             | ION=[M+H+H] <sup>2+</sup> |             | 21.54    | 1528.00  | 504.00   | 0.00      |
| 2383 | 56.11 | 643.36846 |        |                                                                         |             | ION=[M+H+H] <sup>2+</sup> |             | 16.31    | 0.00     | 16.83    | 10620.33  |
| 2384 | 56.34 | 643.36914 |        |                                                                         |             | ION=[M+H+H] <sup>2+</sup> |             | 0.00     | 31.83    | 0.00     | 6095.00   |
| 2385 | 56.11 | 393.29926 |        |                                                                         |             | ION=[M+H+H] <sup>2+</sup> |             | 7.54     | 0.00     | 0.00     | 12525.00  |
| 2386 | 56.16 | 257.24783 |        |                                                                         |             | ION=[M+H] <sup>+</sup>    |             | 0.00     | 4377.00  | 0.00     | 0.00      |
| 2387 | 56.73 | 185.01085 |        |                                                                         |             | ION=[M+H] <sup>+</sup>    |             | 1075.85  | 572.00   | 2210.67  | 3124.33   |
| 2388 | 56.51 | 454.17991 |        |                                                                         |             | ION=[M+K] <sup>+</sup>    |             | 13829.08 | 2030.33  | 11890.00 | 38182.67  |
| 2389 | 56.69 | 271.26236 |        |                                                                         |             | ION=[M+H] <sup>+</sup>    |             | 23.08    | 74077.17 | 14.33    | 17.00     |
| 2390 | 58.83 | 292.0567  |        |                                                                         |             | ION=[M+H] <sup>+</sup>    |             | 23781.85 | 23675.67 | 5411.50  | 47657.67  |
| 2391 | 58.5  | 229.10599 | NA     | 2-Pyridinecarbaldehyde N-(4-amino-6-methyl-1,3,5-triazin-2-yl)hydrazone | C10H11N7    | ION=[M+H] <sup>+</sup>    |             | 2974.92  | 902.33   | 1254.50  | 1924.33   |
| 2392 | 58.41 | 343.28457 |        |                                                                         |             | ION=[M+H] <sup>+</sup>    |             | 6209.08  | 88.50    | 0.00     | 0.00      |
| 2393 | 58.81 | 436.16856 | 23.868 | Hexose-palythine-serine                                                 | C17H28N2O11 | ION=[M+H] <sup>+</sup>    |             | 7781.85  | 6181.83  | 11735.00 | 14256.33  |
| 2394 | 57.93 | 171.12604 |        |                                                                         |             | ION=[M+H] <sup>+</sup>    |             | 0.00     | 0.00     | 0.00     | 11969.67  |
| 2395 | 56.58 | 890.35538 |        |                                                                         |             | ION=[M+H] <sup>+</sup>    |             | 1879.23  | 1872.00  | 5466.33  | 2534.00   |
| 2396 | 56.69 | 200.08215 | NA     | Bis(4-hydroxyphenyl)methane                                             | C13H12O2    | ION=[M+H] <sup>+</sup>    |             | 3204.15  | 1666.33  | 3188.50  | 1660.00   |
| 2397 | 57.23 | 218.08867 | 12.942 | 4-[2-(3,5-diamino-1h-pyrazol-4-yl)diazen-1-yl]phenol                    | C9H10N6O    | ION=[M+H] <sup>+</sup>    |             | 60222.31 | 20492.50 | 50255.83 | 0.00      |
| 2398 | 56.71 | 461.21051 |        |                                                                         |             | ION=[M+H+H] <sup>2+</sup> |             | 2826.46  | 20037.33 | 13847.50 | 21200.00  |
| 2399 | 57.01 | 231.0538  |        |                                                                         |             | ION=[M+H] <sup>+</sup>    |             | 34.46    | 3635.00  | 451.00   | 0.00      |
| 2400 | 57.52 | 454.11034 |        |                                                                         |             | ION=[M+H] <sup>+</sup>    |             | 6341.38  | 3308.33  | 1277.67  | 15225.00  |
| 2401 | 57.04 | 271.2587  |        |                                                                         |             | ION=[M+H+H] <sup>2+</sup> |             | 0.00     | 3216.50  | 32.50    | 0.00      |
| 2402 | 57.54 | 261.13228 | NA     | Methapyrilene                                                           | C14H19N3S   | ION=[M+H] <sup>+</sup>    |             | 3119.69  | 2014.00  | 2537.50  | 2145.33   |
| 2403 | 60.35 | 145.08457 | NA     | 4-Guanidinobutyric acid                                                 | C5H11N3O2   | ION=[M+H] <sup>+</sup>    |             | 775.85   | 2791.67  | 314.67   | 40.00     |
| 2404 | 57.83 | 438.13618 |        |                                                                         |             | ION=[M+H] <sup>+</sup>    |             | 5015.38  | 7207.50  | 1572.50  | 6701.33   |
| 2405 | 59    | 213.11291 |        |                                                                         |             | ION=[M+H] <sup>+</sup>    |             | 3936.92  | 1649.33  | 9861.50  | 3031.00   |
| 2406 | 59    | 262.16398 |        |                                                                         |             | ION=[M+H] <sup>+</sup>    |             | 0.00     | 3407.67  | 0.00     | 0.00      |

|      |       |           |        |                                                                                                         |             |               |             |           |          |           |           |
|------|-------|-----------|--------|---------------------------------------------------------------------------------------------------------|-------------|---------------|-------------|-----------|----------|-----------|-----------|
| 2407 | 58.67 | 342.11684 | 7.978  | Sucrose                                                                                                 | C12H22O11   | ION=[M+K]+    |             | 7146.92   | 4247.67  | 7136.33   | 31449.67  |
| 2408 | 58.51 | 251.10058 | NA     | Muramic acid                                                                                            | C9H17NO7    | ION=[M+H]+    |             | 3831.54   | 3385.33  | 3943.83   | 555.67    |
| 2409 | 57.88 | 193.09674 | 11.027 | (2R)-1-(6-Amino-9H-purin-9-yl)propan-2-ol                                                               | C8H11N5O    | ION=[M+H]+    |             | 61.23     | 14323.00 | 199.83    | 0.00      |
| 2410 | 58.75 | 293.03224 |        |                                                                                                         |             | ION=[M+H]+    |             | 0.00      | 0.00     | 2675.50   | 0.00      |
| 2411 | 58.72 | 169.11126 |        |                                                                                                         |             | ION=[M+H]+    |             | 0.00      | 0.00     | 0.00      | 24485.33  |
| 2412 | 58.92 | 291.23126 |        |                                                                                                         |             | ION=[M+H]+    |             | 2011.23   | 10642.33 | 0.00      | 0.00      |
| 2413 | 58.12 | 243.12416 | NA     | 2-(4-Methoxybenzylidene)quinuclidin-3-one                                                               | C15H17NO2   | ION=[M+H]+    |             | 2352.77   | 1026.50  | 2052.33   | 579.33    |
| 2414 | 58.17 | 234.08652 | NA     | (2R)-5-Methoxy-2-methyl-2,3,8,9-tetrahydro-4H-furo[2,3-h]chromen-4-one                                  | C13H14O4    | ION=[M+H]+    |             | 3023.08   | 1726.17  | 2704.00   | 1578.33   |
| 2415 | 58.31 | 343.28493 |        |                                                                                                         |             | ION=[M+H+H]2+ |             | 4424.62   | 37.50    | 0.00      | 0.00      |
| 2416 | 59.78 | 283.03974 |        |                                                                                                         |             | ION=[M+H]+    |             | 1283.38   | 965.50   | 4050.33   | 1956.67   |
| 2417 | 58.36 | 205.09655 | 12.456 | 6-Morpholinopurine                                                                                      | C9H11N5O    | ION=[M+H]+    | 2846-96-0   | 167.23    | 11182.00 | 115.00    | 0.00      |
| 2418 | 58.36 | 203.09217 | NA     | Norfenfluramine                                                                                         | C10H12F3N   | ION=[M+H]+    |             | 1126.62   | 0.00     | 343.17    | 106.33    |
| 2419 | 59.26 | 454.17868 | 17.813 | Curvularin-7-O- $\beta$ -D-glucopyranoside                                                              | C22H30O10   | ION=[M+H]+    |             | 127332.77 | 85082.50 | 185302.83 | 176881.67 |
| 2420 | 60.15 | 472.19227 | 12.379 | Methyl 2-hydroxy-4-[[3-[[4-oxo-3-phenyl-4H-chromen-7-yl]oxy]propoxy]-3-propylbenzoate                   | C29H28O6    | ION=[M+H]+    |             | 2468.62   | 2666.33  | 430.83    | 1390.33   |
| 2421 | 61.32 | 573.2281  |        |                                                                                                         |             | ION=[M+H]+    |             | 3996.31   | 332.67   | 8120.50   | 0.00      |
| 2422 | 60.07 | 186.10147 |        |                                                                                                         |             | ION=[M+H]+    |             | 5002.77   | 1076.50  | 1776.83   | 3333.33   |
| 2423 | 61.18 | 416.15357 |        |                                                                                                         |             | ION=[M+H]+    |             | 2898.15   | 3995.33  | 1061.00   | 2144.00   |
| 2424 | 60.6  | 246.06445 |        |                                                                                                         |             | ION=[M+H]+    |             | 909.08    | 0.00     | 0.00      | 0.00      |
| 2425 | 59.21 | 147.05312 | 2.035  | N-Acetylserine                                                                                          | C5H9NO4     | ION=[M+H]+    |             | 17897.85  | 20667.17 | 37014.50  | 34148.33  |
| 2426 | 59.36 | 227.0892  |        |                                                                                                         |             | ION=[M+H]+    |             | 2720.77   | 3460.00  | 7518.83   | 5464.33   |
| 2427 | 60.33 | 330.09399 |        |                                                                                                         |             | ION=[M+H+H]2+ |             | 1855.38   | 711.17   | 1686.50   | 1473.00   |
| 2428 | 60.95 | 183.08357 |        |                                                                                                         |             | ION=[M+H]+    |             | 1564.77   | 837.50   | 4738.67   | 1428.00   |
| 2429 | 59.39 | 257.10154 |        |                                                                                                         |             | ION=[M+H]+    |             | 4757.38   | 1770.67  | 7227.17   | 898.67    |
| 2430 | 58.63 | 201.10562 |        |                                                                                                         |             | ION=[M+H]+    |             | 1009.54   | 62.50    | 229.50    | 0.00      |
| 2431 | 58.65 | 216.14259 |        |                                                                                                         |             | ION=[M+H]+    |             | 0.00      | 0.00     | 0.00      | 3662.67   |
| 2432 | 60.84 | 305.24543 |        |                                                                                                         |             | ION=[M+H]+    |             | 0.00      | 30994.00 | 7.83      | 145.67    |
| 2433 | 58.88 | 294.1066  |        |                                                                                                         |             | ION=[M+H+H]2+ |             | 3504.62   | 496.00   | 0.00      | 0.00      |
| 2434 | 58.9  | 908.36503 |        |                                                                                                         |             | ION=[M+H]+    |             | 617.23    | 458.00   | 2128.00   | 2565.00   |
| 2435 | 60.63 | 624.17952 |        |                                                                                                         |             | ION=[M+H]+    |             | 1813.08   | 418.00   | 1705.83   | 5610.00   |
| 2436 | 60.69 | 259.04677 | 19.847 | Glucosamine 6-phosphate                                                                                 | C6H14NO8P   | ION=[M+H]+    |             | 4890.31   | 642.83   | 2964.67   | 8918.00   |
| 2437 | 59.8  | 659.3639  |        |                                                                                                         |             | ION=[M+H+H]2+ |             | 0.00      | 0.00     | 0.00      | 13687.67  |
| 2438 | 59.08 | 229.07428 | NA     | Tebamin                                                                                                 | C13H11NO3   | ION=[M+H]+    | 133-11-9    | 1351.38   | 0.00     | 0.00      | 0.00      |
| 2439 | 60.07 | 208.04152 |        |                                                                                                         |             | ION=[M+H]+    |             | 2363.85   | 1417.83  | 1302.67   | 1492.67   |
| 2440 | 60.35 | 244.07512 |        |                                                                                                         |             | ION=[M+H]+    |             | 1070.77   | 692.00   | 5037.33   | 632.67    |
| 2441 | 60.47 | 276.08553 | 9.327  | N-(1,3-Benzodioxol-5-ylmethyl)-1-methyl-4-nitro-1H-imidazol-5-amine                                     | C12H12N4O4  | ION=[M+H]+    |             | 14626.62  | 21191.00 | 2401.17   | 15710.00  |
| 2442 | 62.28 | 162.05322 | 10.988 | 3-Hydroxy-3-methylglutaric acid                                                                         | C6H10O5     | ION=[M+H]+    |             | 7944.15   | 10646.00 | 3390.83   | 7757.67   |
| 2443 | 61.95 | 254.10041 | NA     | Diprophylline                                                                                           | C10H14N4O4  | ION=[M+H]+    | 479-18-5    | 10613.54  | 18097.17 | 3570.17   | 8497.00   |
| 2444 | 61.45 | 123.03146 | 3.933  | Nicotinic acid                                                                                          | C6H5NO2     | ION=[M+H]+    |             | 14251.08  | 10064.83 | 28351.67  | 19790.67  |
| 2445 | 61.26 | 255.07461 | 4.269  | N2-[3-(Trifluoromethyl)phenyl]-1,3,5-triazine-2,4-diamine                                               | C10H8F3N5   | ION=[M+H]+    |             | 60465.23  | 48548.33 | 124070.67 | 76864.33  |
| 2446 | 60.6  | 426.08097 |        |                                                                                                         |             | ION=[M+H]+    |             | 1312.92   | 853.33   | 1549.67   | 1690.67   |
| 2447 | 60.89 | 428.33486 |        |                                                                                                         |             | ION=[M+H+H]2+ |             | 8950.77   | 0.00     | 0.00      | 312.00    |
| 2448 | 62.64 | 229.08982 |        |                                                                                                         |             | ION=[M+H]+    |             | 6952.77   | 3984.50  | 22531.50  | 6606.33   |
| 2449 | 61.37 | 252.09837 | 47.054 | Guanitoxin                                                                                              | C7H17N4O4P  | ION=[M+H]+    |             | 2153.69   | 3237.67  | 370.00    | 0.00      |
| 2450 | 62.45 | 259.15307 |        |                                                                                                         |             | ION=[M+H]+    |             | 4728.31   | 1318.67  | 2519.50   | 7624.67   |
| 2451 | 62.37 | 238.16799 | 15.428 | 1,5-Ditetrahydro-1H-pyrrol-1-ylpentane-1,5-dione                                                        | C13H22N2O2  | ION=[M+H]+    |             | 0.00      | 0.00     | 0.00      | 4845.00   |
| 2452 | 63.01 | 232.14194 | 12.408 | (+)-Costunolide                                                                                         | C15H20O2    | ION=[M+H]+    | 553-21-9    | 6938.15   | 1508.50  | 3482.50   | 9510.00   |
| 2453 | 60.75 | 219.11137 | 5.597  | trans-Zeatin                                                                                            | C10H13N5O   | ION=[M+H]+    |             | 0.00      | 2604.50  | 0.00      | 218.67    |
| 2454 | 62.54 | 201.09574 |        |                                                                                                         |             | ION=[M+H]+    |             | 3606.77   | 1914.50  | 11477.67  | 3315.67   |
| 2455 | 62.19 | 245.08413 | 9.909  | 5-Fluoro-2'-deoxycytidine                                                                               | C9H12FN3O4  | ION=[M+H]+    |             | 33962.77  | 15172.33 | 109445.17 | 25360.00  |
| 2456 | 62.6  | 221.09206 | 17.86  | N-Acetyl-D-galactosamine                                                                                | C8H15NO6    | ION=[M+H]+    |             | 6827.08   | 3326.17  | 9127.17   | 8102.33   |
| 2457 | 62.64 | 275.10732 | NA     | N-Benzyl-N-isopropyl-4-methyl-1,2,3-thiadiazole-5-carboxamide                                           | C14H17N3OS  | ION=[M+H]+    |             | 6650.77   | 5742.67  | 6170.00   | 5211.67   |
| 2458 | 63.18 | 317.08455 | 18.915 | Polyoxin C                                                                                              | C11H15N3O8  | ION=[M+H]+    |             | 914.77    | 290.33   | 38.50     | 2913.67   |
| 2459 | 62.48 | 368.14348 |        |                                                                                                         |             | ION=[M+H]+    |             | 1298.15   | 865.00   | 2934.17   | 2470.33   |
| 2460 | 61.56 | 324.1058  | 19.235 | Furaltadone                                                                                             | C13H16N4O6  | ION=[M+H]+    | 139-91-3    | 9252.77   | 5329.17  | 3316.67   | 9969.33   |
| 2461 | 61.57 | 111.04265 |        |                                                                                                         |             | ION=[M+H]+    |             | 842.62    | 2099.17  | 664.50    | 1152.00   |
| 2462 | 62.3  | 230.09245 | NA     | Naproxen                                                                                                | C14H14O3    | ION=[M+H]+    | 22204-53-1  | 3011.69   | 1158.00  | 3642.50   | 2177.67   |
| 2463 | 61.82 | 277.09054 | NA     | 12-(aminomethyl)-4-methoxy-8-thia-11,14-diazatricyclo[7.5.0.0s,?]tetradeca-1(9),2(7),3,5-tetraen-10-one | C13H15N3O2S | ION=[M+H]+    |             | 1716.15   | 1496.33  | 894.67    | 1247.67   |
| 2464 | 62.32 | 203.08208 |        |                                                                                                         |             | ION=[M+H]+    |             | 8603.38   | 4305.00  | 10092.50  | 8501.33   |
| 2465 | 62.34 | 204.11079 |        |                                                                                                         |             | ION=[M+H]+    |             | 4512.31   | 2236.50  | 2129.17   | 3302.00   |
| 2466 | 62.85 | 217.0964  |        |                                                                                                         |             | ION=[M+H]+    |             | 220.00    | 4106.67  | 406.00    | 889.00    |
| 2467 | 62.94 | 274.11625 | NA     | Palythine-serine                                                                                        | C11H18N2O6  | ION=[M+H]+    |             | 126.15    | 151.33   | 3794.17   | 147.00    |
| 2468 | 63.09 | 243.07582 | NA     | 2-[2-(2h-1,2,3,4-tetrazol-5-yl)ethyl]-2,3-dihydro-1h-isoindole-1,3-dione                                | C11H9N5O2   | ION=[M+H]+    | 412314-56-8 | 3390.31   | 2278.33  | 3928.33   | 4521.67   |



|      |       |           |        |                                                                                                             |            |                            |             |           |           |           |           |
|------|-------|-----------|--------|-------------------------------------------------------------------------------------------------------------|------------|----------------------------|-------------|-----------|-----------|-----------|-----------|
| 2469 | 63.12 | 246.12115 | NA     | 1-methyl-2-[(2,4,6-trimethylphenyl)methylsulfanyl]imidazole                                                 | C14H18N2S  | ION=[M+H] <sup>+</sup>     |             | 6689.23   | 1589.33   | 143.83    | 4891.00   |
| 2470 | 63.18 | 243.05223 |        |                                                                                                             |            | ION=[M+H] <sup>+</sup>     |             | 0.00      | 7867.33   | 0.00      | 0.00      |
| 2471 | 64.22 | 306.14274 | 14.957 | 9a-Hydroxy-3,8a-dimethyl-5-methylene-2-oxo-2,4,4a,5,6,7,8,8a,9,9a-decahydronaphtho[2,3-b]furan-8-yl acetate | C17H22O5   | ION=[M+K] <sup>+</sup>     |             | 63.08     | 214.50    | 9818.50   | 175.33    |
| 2472 | 64.12 | 294.08827 |        |                                                                                                             |            | ION=[M+H] <sup>+</sup>     |             | 18457.08  | 13293.83  | 21786.00  | 14384.33  |
| 2473 | 63.26 | 586.2236  |        |                                                                                                             |            | ION=[M+H] <sup>+</sup>     |             | 6119.23   | 4771.83   | 13654.50  | 12901.00  |
| 2474 | 64.05 | 185.94971 |        |                                                                                                             |            | ION=[M+H] <sup>+</sup>     |             | 6788.00   | 6395.17   | 5826.33   | 2050.00   |
| 2475 | 65.15 | 218.12167 | 8.04   | Meprobamate                                                                                                 | C9H18N2O4  | ION=[M+H] <sup>+</sup>     | 57-53-4     | 11970.15  | 0.00      | 0.00      | 0.00      |
| 2476 | 65.91 | 172.08407 |        |                                                                                                             |            | ION=[M+H] <sup>+</sup>     |             | 470.92    | 643.00    | 1397.67   | 1800.67   |
| 2477 | 67.37 | 248.10189 | 6.108  | Tetrahydrouridine                                                                                           | C9H16N2O6  | ION=[M+H] <sup>+</sup>     |             | 3157.85   | 4113.83   | 4949.83   | 2822.00   |
| 2478 | 65.24 | 305.04101 |        |                                                                                                             |            | ION=[M+H] <sup>+</sup>     |             | 445.38    | 6518.33   | 1235.50   | 2271.67   |
| 2479 | 66.4  | 312.0823  |        |                                                                                                             |            | ION=[M+H] <sup>+</sup>     |             | 1397.85   | 650.83    | 65.67     | 204.33    |
| 2480 | 69.34 | 276.08771 |        |                                                                                                             |            | ION=[M+H] <sup>+</sup>     |             | 1841.69   | 4643.33   | 3574.17   | 1484.00   |
| 2481 | 73.76 | 171.97023 |        |                                                                                                             |            | ION=[M+H] <sup>+</sup>     |             | 13245.38  | 12124.33  | 12705.17  | 10976.67  |
| 2482 | 74.13 | 217.09597 | NA     | Pymetrozine                                                                                                 | C10H11N5O  | ION=[M+H] <sup>+</sup>     | 123312-89-0 | 343.23    | 6012.17   | 295.33    | 1602.67   |
| 2483 | 77.15 | 123.0313  | 10.575 | Nicotinic acid                                                                                              | C6H5NO2    | ION=[M+H] <sup>+</sup>     |             | 3718.31   | 1977.67   | 4985.17   | 9375.33   |
| 2484 | 74.19 | 216.07688 | NA     | 2,6-diamino-3h,7h,8h-imidazo[4,5-g]quinazolin-8-one                                                         | C9H8N6O    | ION=[M+H] <sup>+</sup>     |             | 3306.92   | 3175.00   | 3220.00   | 6579.00   |
| 2485 | 76.08 | 255.07546 | 12.878 | N2-[3-(Trifluoromethyl)phenyl]-1,3,5-triazine-2,4-diamine                                                   | C10H8F3N5  | ION=[M+H] <sup>+</sup>     |             | 11800.77  | 3586.67   | 14489.00  | 37632.67  |
| 2486 | 74.21 | 189.98158 |        |                                                                                                             |            | ION=[M+H] <sup>+</sup>     |             | 6691.23   | 6099.33   | 5149.17   | 4569.67   |
| 2487 | 74.55 | 252.09847 | NA     | Guanitoxin                                                                                                  | C7H17N4O4P | ION=[M+H] <sup>+</sup>     |             | 1078.31   | 2475.83   | 32.83     | 0.00      |
| 2488 | 77.05 | 291.09351 | NA     | Neu5ac2en                                                                                                   | C11H17NO8  | ION=[M+H] <sup>+</sup>     |             | 0.00      | 425.17    | 0.00      | 3238.00   |
| 2489 | 75.31 | 187.08623 |        |                                                                                                             |            | ION=[M+H] <sup>+</sup>     |             | 641.08    | 2846.17   | 253.67    | 926.33    |
| 2490 | 76.57 | 444.81948 |        |                                                                                                             |            | ION=[M+H] <sup>+</sup>     |             | 4680.46   | 4443.83   | 2473.83   | 7235.00   |
| 2491 | 76.57 | 234.08694 | 19.047 | (2R)-5-Methoxy-2-methyl-2,3,8,9-tetrahydro-4H-furo[2,3-h]chromen-4-one                                      | C13H14O4   | ION=[M+H] <sup>+</sup>     |             | 5531.38   | 4125.33   | 3385.83   | 4604.67   |
| 2492 | 76.93 | 218.1185  |        |                                                                                                             |            | ION=[M+H] <sup>+</sup>     |             | 2176.00   | 1811.83   | 645.17    | 1019.00   |
| 2493 | 78.1  | 246.06519 | NA     | Doxifluridine                                                                                               | C9H11FN2O5 | ION=[M+H] <sup>+</sup>     |             | 1490.46   | 1244.83   | 1799.33   | 0.00      |
| 2494 | 78.98 | 293.06913 |        |                                                                                                             |            | ION=[M+H] <sup>+</sup>     |             | 4582.31   | 1481.00   | 7183.50   | 3762.00   |
| 2495 | 80.74 | 157.95411 |        |                                                                                                             |            | ION=[M+H] <sup>+</sup>     |             | 4948.62   | 2210.83   | 6036.00   | 1996.00   |
| 2496 | 79.59 | 253.94244 |        |                                                                                                             |            | ION=[M+H] <sup>+</sup>     |             | 3678.15   | 2778.17   | 2153.50   | 162.67    |
| 2497 | 79.63 | 276.09456 |        |                                                                                                             |            | ION=[M+H] <sup>+</sup>     |             | 2756.15   | 2291.83   | 4766.33   | 2097.33   |
| 2498 | 79.69 | 328.12502 |        |                                                                                                             |            | ION=[M+H] <sup>+</sup>     |             | 15.85     | 0.00      | 3857.50   | 0.00      |
| 2499 | 81.07 | 552.15771 |        |                                                                                                             |            | ION=[M+H] <sup>+</sup>     |             | 3622.46   | 1448.83   | 3287.00   | 8280.00   |
| 2500 | 82.03 | 305.24661 |        |                                                                                                             |            | ION=[M+H] <sup>+</sup>     |             | 6.46      | 3314.00   | 7.50      | 11.00     |
| 2501 | 82.8  | 404.35005 |        |                                                                                                             |            | ION=[M+H+H] <sup>2+</sup>  |             | 0.00      | 24001.17  | 0.00      | 0.00      |
| 2502 | 81.11 | 229.07105 | 4.818  | N1-(2-Hydrazino-2-oxoethyl)-2,6-difluorobenzamide                                                           | C9H9F2N3O2 | ION=[M+H] <sup>+</sup>     |             | 22607.08  | 0.00      | 260346.50 | 63824.33  |
| 2503 | 82.91 | 404.34526 |        |                                                                                                             |            | ION=[M+H+H2] <sup>3+</sup> |             | 0.00      | 2397.33   | 0.00      | 0.00      |
| 2504 | 82.64 | 235.93218 |        |                                                                                                             |            | ION=[M+H] <sup>+</sup>     |             | 2815.23   | 2829.00   | 1787.50   | 56.33     |
| 2505 | 84.37 | 218.11996 |        |                                                                                                             |            | ION=[M+H] <sup>+</sup>     |             | 360.00    | 434.00    | 380.00    | 572.67    |
| 2506 | 82.94 | 181.97836 |        |                                                                                                             |            | ION=[M+H] <sup>+</sup>     |             | 3148.77   | 3089.50   | 3279.33   | 351.33    |
| 2507 | 85.98 | 255.9322  |        |                                                                                                             |            | ION=[M-H2O+H] <sup>+</sup> |             | 4223.54   | 3601.83   | 4180.00   | 2790.00   |
| 2508 | 85.93 | 323.05201 |        |                                                                                                             |            | ION=[M+H] <sup>+</sup>     |             | 73.23     | 3263.67   | 678.17    | 177.00    |
| 2509 | 83.36 | 129.04212 | 1.751  | Pyroglutamate                                                                                               | C5H7NO3    | ION=[M+H] <sup>+</sup>     |             | 740.00    | 111.50    | 10254.17  | 2108.67   |
| 2510 | 83.81 | 183.06587 | 15.472 | DL-4-Fluorophenylalanine                                                                                    | C9H10FNO2  | ION=[M+H] <sup>+</sup>     |             | 326.62    | 6.67      | 4440.00   | 962.00    |
| 2511 | 83.42 | 185.07716 |        |                                                                                                             |            | ION=[M+H] <sup>+</sup>     |             | 373.08    | 272.67    | 3356.83   | 1141.67   |
| 2512 | 85.04 | 232.1422  | 1.703  | Mebutamate                                                                                                  | C10H20N2O4 | ION=[M+H] <sup>+</sup>     |             | 7021.54   | 2008.50   | 2160.00   | 514.00    |
| 2513 | 84.82 | 259.15341 | 14.66  | (tert-butylloxycarbonyl)-alanyl-amino ethyl-formamide                                                       | C11H21N3O4 | ION=[M+H] <sup>+</sup>     |             | 4642.31   | 1710.67   | 1579.33   | 870.33    |
| 2514 | 85.4  | 195.95477 |        |                                                                                                             |            | ION=[M+H] <sup>+</sup>     |             | 123013.69 | 132710.17 | 88633.00  | 185475.33 |
| 2515 | 88.61 | 242.02047 |        |                                                                                                             |            | ION=[M+H] <sup>+</sup>     |             | 4224.00   | 2561.50   | 8694.17   | 9440.33   |
| 2516 | 88.5  | 282.01183 |        |                                                                                                             |            | ION=[M+H] <sup>+</sup>     |             | 2711.85   | 1958.83   | 4549.00   | 517.67    |
| 2517 | 88.14 | 246.12165 |        |                                                                                                             |            | ION=[M+H] <sup>+</sup>     |             | 6042.77   | 702.17    | 1505.67   | 1586.00   |
| 2518 | 87.85 | 260.03013 | 3.443  | D-Fructose 1-phosphate                                                                                      | C6H13O9P   | ION=[M+H] <sup>+</sup>     |             | 6923.54   | 3810.83   | 14472.33  | 21256.33  |
| 2519 | 90.46 | 203.96071 |        |                                                                                                             |            | ION=[M-H2O+H] <sup>+</sup> |             | 6991.85   | 7342.67   | 5873.00   | 649.33    |
| 2520 | 91.77 | 291.08982 |        |                                                                                                             |            | ION=[M+H] <sup>+</sup>     |             | 10047.69  | 4464.33   | 14452.33  | 8515.67   |
| 2521 | 91.92 | 157.954   |        |                                                                                                             |            | ION=[M+H] <sup>+</sup>     |             | 5372.77   | 6250.83   | 3275.00   | 0.00      |
| 2522 | 91.75 | 274.11643 | NA     | Palythine-serine                                                                                            | C11H18N2O6 | ION=[M+H] <sup>+</sup>     |             | 112.77    | 79.17     | 9861.67   | 857.33    |
| 2523 | 92.98 | 323.08555 |        |                                                                                                             |            | ION=[M+H] <sup>+</sup>     |             | 370.92    | 5463.83   | 0.00      | 0.00      |
| 2524 | 93.08 | 444.81917 |        |                                                                                                             |            | ION=[M+H] <sup>+</sup>     |             | 4802.31   | 3936.50   | 4259.00   | 7435.67   |
| 2525 | 93.66 | 340.0438  |        |                                                                                                             |            | ION=[M+H] <sup>+</sup>     |             | 4122.15   | 1202.33   | 1982.50   | 0.00      |
| 2526 | 93.9  | 246.12084 | 18.063 | Loxoprofen                                                                                                  | C15H18O3   | ION=[M+H] <sup>+</sup>     |             | 13647.85  | 1922.17   | 4416.67   | 7420.33   |
| 2527 | 94.19 | 246.05105 | 4.756  | [(2,3,4,6-tetrahydroxyhexyl)oxy]phosphonic acid                                                             | C6H15O8P   | ION=[M+H] <sup>+</sup>     |             | 26165.23  | 5671.33   | 28324.83  | 11515.33  |
| 2528 | 95.59 | 305.24562 |        |                                                                                                             |            | ION=[M+H+H] <sup>2+</sup>  |             | 0.00      | 62434.83  | 0.00      | 0.00      |
| 2529 | 94.31 | 318.06231 |        |                                                                                                             |            | ION=[M+H] <sup>+</sup>     |             | 7659.69   | 1656.83   | 3871.83   | 1719.33   |
| 2530 | 94.7  | 377.1455  |        |                                                                                                             |            | ION=[M+H] <sup>+</sup>     |             | 1976.31   | 160.00    | 1215.67   | 33.33     |
| 2531 | 94.43 | 328.12541 |        |                                                                                                             |            | ION=[M+H] <sup>+</sup>     |             | 0.00      | 42.17     | 3965.83   | 0.00      |
| 2532 | 94.25 | 214.01016 |        |                                                                                                             |            | ION=[M+H] <sup>+</sup>     |             | 860.46    | 4418.17   | 6237.67   | 207.33    |
| 2533 | 94.32 | 217.09892 | 11.629 | Pymetrozine                                                                                                 | C10H11N5O  | ION=[M+H] <sup>+</sup>     | 123312-89-0 | 153.38    | 9942.67   | 653.50    | 505.67    |
| 2534 | 95.49 | 643.36835 |        |                                                                                                             |            | ION=[M+H+H2] <sup>3+</sup> |             | 0.00      | 78.50     | 13.83     | 15171.33  |



|      |       |            |        |                                                                                                             |               |                |             |          |          |          |           |
|------|-------|------------|--------|-------------------------------------------------------------------------------------------------------------|---------------|----------------|-------------|----------|----------|----------|-----------|
| 2535 | 95.49 | 643.3682   |        |                                                                                                             |               | ION=[M+H+H]2+  |             | 371.23   | 164.00   | 226.50   | 16296.67  |
| 2536 | 96.3  | 238.16761  | 9.21   | 1,5-Ditetrahydro-1H-pyrrol-1-ylpentane-1,5-dione                                                            | C13H22N2O2    | ION=[M+H]+     |             | 0.00     | 0.00     | 0.00     | 5775.00   |
| 2537 | 94.58 | 306.14272  | 19.044 | 9a-Hydroxy-3,8a-dimethyl-5-methylene-2-oxo-2,4,4a,5,6,7,8,8a,9,9a-decahydronaphtho[2,3-b]furan-8-yl acetate | C17H22O5      | ION=[M+H]+     |             | 96.46    | 2454.83  | 12966.17 | 23.00     |
| 2538 | 95.59 | 250.15059  | 19.209 | Desmethylmianserin                                                                                          | C17H18N2      | ION=[M+H]+     |             | 1604.77  | 2308.50  | 1480.17  | 948.33    |
| 2539 | 95.48 | 304.13806  |        |                                                                                                             |               | ION=[M+H]+     |             | 625.69   | 98.33    | 5865.67  | 221.00    |
| 2540 | 96    | 244.1083   | 40.52  | Palythine                                                                                                   | C10H16N2O5    | ION=[M+H]+     |             | 750.46   | 2586.17  | 179.67   | 49.33     |
| 2541 | 95.81 | 659.36266  |        |                                                                                                             |               | ION=[M+H+H2]3+ |             | 0.00     | 0.00     | 0.00     | 107509.67 |
| 2542 | 95.93 | 306.15807  |        |                                                                                                             |               | ION=[M+H]+     |             | 567.38   | 2976.17  | 0.00     | 190.33    |
| 2543 | 95.72 | 288.13219  |        |                                                                                                             |               | ION=[M+H]+     |             | 0.00     | 3174.17  | 20804.00 | 0.00      |
| 2544 | 96.14 | 659.36277  |        |                                                                                                             |               | ION=[M+H+H]2+  |             | 868.62   | 438.83   | 70.83    | 196869.67 |
| 2545 | 95.46 | 275.10784  |        |                                                                                                             |               | ION=[M+H]+     |             | 0.00     | 67.83    | 1691.33  | 0.00      |
| 2546 | 94.81 | 215.08046  | 9.512  | Kinetin                                                                                                     | C10H9N5O      | ION=[M+H]+     |             | 256.46   | 840.50   | 4055.33  | 0.00      |
| 2547 | 94.85 | 231.14777  |        |                                                                                                             |               | ION=[M+H]+     |             | 1126.46  | 7175.00  | 24.67    | 0.00      |
| 2548 | 95.2  | 279.13293  | 14.261 | Tert-butyl n-((2-amino-4-oxo-3h,4h,7h-pyrrolo[2,3-d]pyrimidin-5-yl)methyl)carbamate                         | C12H17N5O3    | ION=[M+H]+     |             | 392.62   | 794.00   | 403.67   | 57956.33  |
| 2549 | 95.63 | 256.10511  |        |                                                                                                             |               | ION=[M+H]+     |             | 184.15   | 587.50   | 3325.33  | 593.67    |
| 2550 | 95.42 | 252.10015  | 35.466 | Guanitoxin                                                                                                  | C7H17N4O4P    | ION=[M+H]+     |             | 9657.69  | 14086.33 | 0.00     | 113.33    |
| 2551 | 95.55 | 131.09418  | 3.688  | Leucine                                                                                                     | C6H13NO2      | ION=[M+H]+     |             | 5912.62  | 3450.83  | 4804.17  | 6401.00   |
| 2552 | 95.59 | 342.20975  |        |                                                                                                             |               | ION=[M+H]+     |             | 884.62   | 43.33    | 0.00     | 0.00      |
| 2553 | 96.13 | 1276.57253 |        |                                                                                                             |               | ION=[M+H+H]2+  |             | 1466.46  | 733.83   | 6760.00  | 580.33    |
| 2554 | 95.75 | 1276.56535 |        |                                                                                                             |               | ION=[M+H+H2]3+ |             | 7724.62  | 6022.50  | 28340.50 | 9536.00   |
| 2555 | 96.29 | 234.111    | 6.848  | Triethyleneglycol diacetate                                                                                 | C10H18O6      | ION=[M+H]+     |             | 0.00     | 76773.83 | 71.00    | 0.00      |
| 2556 | 96.54 | 252.12205  |        |                                                                                                             |               | ION=[M+H]+     |             | 0.00     | 6768.17  | 57.00    | 0.00      |
| 2557 | 96.66 | 202.08608  | 4.346  | Metamitron                                                                                                  | C10H10N4O     | ION=[M-H2O+H]+ | 41394-05-2  | 10.46    | 25094.17 | 70.83    | 0.00      |
| 2558 | 97.18 | 350.09709  |        |                                                                                                             |               | ION=[M+H]+     |             | 8.62     | 17113.17 | 14.17    | 67.00     |
| 2559 | 96.52 | 198.09099  | 12.094 | Guaifenesin                                                                                                 | C10H14O4      | ION=[M+H]+     |             | 55.85    | 8992.00  | 9.50     | 0.00      |
| 2560 | 97.3  | 243.12532  | NA     | 2-(4-Methoxybenzylidene)quinuclidin-3-one                                                                   | C15H17NO2     | ION=[M+H]+     |             | 108.00   | 1177.00  | 82.67    | 3827.00   |
| 2561 | 97.87 | 252.11153  | 10.125 | N-cyclopropyl-4-{pyrazolo[1,5-b]pyridazin-3-yl}pyrimidin-2-amine                                            | C13H12N6      | ION=[M+H]+     | 551919-54-1 | 9930.31  | 11259.67 | 7011.17  | 7460.67   |
| 2562 | 97.64 | 347.06384  | 1.853  | 2'-Deoxyguanosine 5'-phosphate                                                                              | C10H14N5O7P   | ION=[M+H]+     |             | 11361.85 | 24766.33 | 69789.50 | 10427.00  |
| 2563 | 96.66 | 142.0628   | 7.308  | Glycidyl methacrylate                                                                                       | C7H10O3       | ION=[M+H]+     | 106-91-2    | 0.00     | 14211.83 | 38.83    | 11.00     |
| 2564 | 97.44 | 673.35781  |        |                                                                                                             |               | ION=[M+H+H]2+  |             | 756.46   | 73.33    | 78.67    | 22202.33  |
| 2565 | 97.79 | 612.15418  | 2.505  | Oxiglutatione                                                                                               | C20H32N6O12S2 | ION=[M+H]+     | 27025-41-8  | 4770.00  | 2660.67  | 22760.50 | 8007.33   |
| 2566 | 97.57 | 514.23806  |        |                                                                                                             |               | ION=[M+H]+     |             | 2493.69  | 62.33    | 76.50    | 61.33     |
| 2567 | 96.64 | 428.33756  |        |                                                                                                             |               | ION=[M+H]+     |             | 2144.00  | 0.00     | 0.00     | 0.00      |
| 2568 | 97.33 | 358.18717  |        |                                                                                                             |               | ION=[M+H]+     |             | 898.31   | 2248.83  | 461.67   | 6022.00   |
| 2569 | 97.68 | 293.11049  |        |                                                                                                             |               | ION=[M+H]+     |             | 14269.23 | 6547.50  | 12109.83 | 16876.67  |
| 2570 | 97.11 | 673.35562  |        |                                                                                                             |               | ION=[M+H+H2]3+ |             | 17.69    | 12.17    | 0.00     | 20816.00  |
| 2571 | 97.34 | 260.13798  | 11.316 | Gaburedin B                                                                                                 | C11H20N2O5    | ION=[M+H]+     |             | 37591.38 | 10333.17 | 10321.50 | 6855.00   |
| 2572 | 97.13 | 276.09391  |        |                                                                                                             |               | ION=[M+H]+     |             | 2025.38  | 1370.50  | 4051.17  | 0.00      |
| 2573 | 96.03 | 278.126    | NA     | Oxadixyl                                                                                                    | C14H18N2O4    | ION=[M+H]+     | 77732-09-3  | 3030.92  | 1083.00  | 497.33   | 2481.00   |
| 2574 | 96.07 | 192.02848  | 11.681 | Citric acid                                                                                                 | C6H8O7        | ION=[M+H]+     |             | 1111.23  | 2134.33  | 3809.50  | 4662.67   |
| 2575 | 97.72 | 275.10003  |        |                                                                                                             |               | ION=[M+H]+     |             | 23611.54 | 7200.33  | 23231.83 | 30748.67  |
| 2576 | 97.97 | 188.11724  | 15.836 | Glycyl-L-leucine                                                                                            | C8H16N2O3     | ION=[M+H]+     |             | 9421.69  | 2026.33  | 3526.67  | 5280.00   |
| 2577 | 98.23 | 115.06292  | 9.613  | Proline                                                                                                     | C5H9NO2       | ION=[M+H]+     |             | 2485.38  | 347.00   | 852.33   | 1484.67   |
| 2578 | 98.87 | 198.17272  | NA     | Cycluron                                                                                                    | C11H22N2O     | ION=[M+H]+     |             | 2730.77  | 11.00    | 246.17   | 0.00      |
| 2579 | 96.43 | 344.1525   | NA     | N7-butyl-n2-(5-chloro-2-methylphenyl)-5-methyl[1                                                            | C17H21ClN6    | ION=[M+H]+     |             | 16.46    | 27.67    | 2231.17  | 0.00      |
| 2580 | 98.14 | 497.46213  |        |                                                                                                             |               | ION=[M+H+H2]3+ |             | 59624.92 | 0.00     | 9495.67  | 0.00      |
| 2581 | 97.93 | 214.13347  | 11.104 | Desthiobiotin                                                                                               | C10H18N2O3    | ION=[M+H]+     |             | 16975.38 | 3014.83  | 5303.50  | 12794.00  |
| 2582 | 98.98 | 1251.52146 |        |                                                                                                             |               | ION=[M+H+H]2+  |             | 176.46   | 272.33   | 1668.17  | 845.33    |
| 2583 | 97.64 | 696.21921  |        |                                                                                                             |               | ION=[M+H]+     |             | 3045.23  | 30.00    | 8361.33  | 2578.00   |
| 2584 | 96.92 | 321.1803   |        |                                                                                                             |               | ION=[M+H]+     |             | 2447.23  | 645.17   | 1219.83  | 1862.00   |
| 2585 | 98.07 | 216.14912  | 22.175 | Anaephene C                                                                                                 | C15H20O       | ION=[M+H]+     |             | 31349.38 | 5753.83  | 8286.50  | 18174.00  |
| 2586 | 96.92 | 282.12183  | NA     | 2-(heptan-2-yl)-4,6-dinitrophenol                                                                           | C13H18N2O5    | ION=[M+H]+     |             | 2816.77  | 206.17   | 601.17   | 258.67    |
| 2587 | 97.79 | 232.10725  | 19.361 | N~2~-(3-Carboxy-1-hydroxypropylidene)ornithine                                                              | C9H16N2O5     | ION=[M+H]+     | 80102-04-1  | 9170.31  | 42129.67 | 11016.50 | 4359.00   |
| 2588 | 98.96 | 1712.74932 |        |                                                                                                             |               | ION=[M+H+H]2+  |             | 874.31   | 804.17   | 4076.67  | 212.67    |
| 2589 | 96.25 | 171.64143  |        |                                                                                                             |               | ION=[M+H]+     |             | 816.00   | 0.00     | 0.00     | 0.00      |
| 2590 | 97.34 | 970.30716  |        |                                                                                                             |               | ION=[M+H+H]2+  |             | 3776.62  | 3812.50  | 9604.00  | 3136.67   |
| 2591 | 98.41 | 1269.53261 |        |                                                                                                             |               | ION=[M+H+H2]3+ |             | 20113.54 | 8546.00  | 37079.00 | 20937.67  |
| 2592 | 96.73 | 1262.50858 |        |                                                                                                             |               | ION=[M+H+H]2+  |             | 2683.38  | 2187.67  | 2885.00  | 2073.33   |
| 2593 | 98.26 | 1269.542   |        |                                                                                                             |               | ION=[M+H+H]2+  |             | 11526.62 | 3917.33  | 20190.17 | 16299.67  |
| 2594 | 96.47 | 1262.50058 |        |                                                                                                             |               | ION=[M+H+H2]3+ |             | 5951.54  | 4574.50  | 5069.83  | 2491.67   |
| 2595 | 98.8  | 555.13204  |        |                                                                                                             |               | ION=[M+H]+     |             | 3832.00  | 2938.33  | 7395.50  | 5963.67   |
| 2596 | 97.59 | 273.16722  |        |                                                                                                             |               | ION=[M+H]+     |             | 942.00   | 0.00     | 90.17    | 0.00      |
| 2597 | 98.24 | 497.46376  |        |                                                                                                             |               | ION=[M+H+H]2+  |             | 29523.38 | 0.00     | 5733.67  | 0.00      |
| 2598 | 96.45 | 262.11621  | 12.21  | 1-(5,8-Dimethoxy-2,2-dimethyl-2H-1-benzopyran-6-yl)ethan-1-one                                              | C15H18O4      | ION=[M+H]+     | 62458-48-4  | 146.15   | 2266.67  | 50.17    | 113.00    |

|      |        |            |        |                                                                                                                     |             |                |             |           |           |           |           |
|------|--------|------------|--------|---------------------------------------------------------------------------------------------------------------------|-------------|----------------|-------------|-----------|-----------|-----------|-----------|
| 2599 | 97.52  | 428.33331  | 17.038 | Nandrolone decanoate                                                                                                | C28H44O3    | ION=[M+H+H]2+  |             | 139249.85 | 0.00      | 0.00      | 0.00      |
| 2600 | 96.77  | 554.23381  | 2.497  | Anabaenolysin var 5                                                                                                 | C28H34N4O8  | ION=[M+H]+     |             | 10695.38  | 976.67    | 14317.67  | 5194.00   |
| 2601 | 99.06  | 193.62823  |        |                                                                                                                     |             | ION=[M+H]+     |             | 159.54    | 66.33     | 96.50     | 9186.67   |
| 2602 | 99.21  | 318.1617   |        |                                                                                                                     |             | ION=[M+H]+     |             | 767.69    | 48.33     | 465.33    | 8099.00   |
| 2603 | 98.65  | 202.13282  | 11.663 | Glutamine T-Butyl Ester                                                                                             | C9H18N2O3   | ION=[M+H]+     | 39741-62-3  | 26205.38  | 6962.17   | 9546.00   | 16969.00  |
| 2604 | 96.66  | 166.06391  | 16.702 | (+)-atrolactic acid                                                                                                 | C9H10O3     | ION=[M+H]+     |             | 0.00      | 3563.50   | 0.00      | 0.00      |
| 2605 | 99.09  | 432.29539  |        |                                                                                                                     |             | ION=[M+H+H]2+  |             | 0.00      | 0.00      | 42.50     | 4255.00   |
| 2606 | 97.16  | 274.10426  |        |                                                                                                                     |             | ION=[M+H]+     |             | 0.00      | 3477.67   | 0.00      | 0.00      |
| 2607 | 96.71  | 302.18322  | 4.386  | Tandamine                                                                                                           | C18H26N2S   | ION=[M+H]+     | 58167-78-5  | 6406.46   | 0.00      | 0.00      | 0.00      |
| 2608 | 97.03  | 215.66494  |        |                                                                                                                     |             | ION=[M+H]+     |             | 190.92    | 0.00      | 3981.83   | 17.33     |
| 2609 | 97.13  | 264.1428   |        |                                                                                                                     |             | ION=[M+H]+     |             | 0.00      | 0.00      | 566.83    | 0.00      |
| 2610 | 97.25  | 515.41886  |        |                                                                                                                     |             | ION=[M+H+H]2+  |             | 2006.62   | 0.00      | 145.17    | 0.00      |
| 2611 | 97.3   | 229.11601  |        |                                                                                                                     |             | ION=[M+H]+     |             | 251.08    | 0.00      | 0.00      | 2152.67   |
| 2612 | 97.57  | 287.15078  |        |                                                                                                                     |             | ION=[M+H]+     |             | 1509.54   | 234.17    | 412.00    | 186.33    |
| 2613 | 97.58  | 515.41891  |        |                                                                                                                     |             | ION=[M+H+H]2+  |             | 2949.23   | 0.00      | 892.83    | 0.00      |
| 2614 | 97.72  | 519.43145  |        |                                                                                                                     |             | ION=[M+H]+     |             | 636.62    | 1741.17   | 2188.83   | 920.67    |
| 2615 | 97.57  | 253.62537  |        |                                                                                                                     |             | ION=[M+H]+     |             | 858.00    | 137.33    | 15.17     | 105.00    |
| 2616 | 98.1   | 296.10066  | 16.146 | Pukeleimide D                                                                                                       | C13H16N2O6  | ION=[M+H]+     |             | 4941.08   | 219.50    | 490.33    | 2778.00   |
| 2617 | 98.5   | 129.04195  | 12.933 | Pyroglutamate                                                                                                       | C5H7NO3     | ION=[M+H]+     |             | 1500.62   | 1444.50   | 4428.17   | 2566.33   |
| 2618 | 99.09  | 288.15118  |        |                                                                                                                     |             | ION=[M+H]+     |             | 429.08    | 643.17    | 75.83     | 8794.00   |
| 2619 | 99.1   | 237.15027  | 11.517 | 4-Fluoro IPV                                                                                                        | C14H20FNO   | ION=[M+H]+     |             | 0.00      | 0.00      | 518.50    | 0.00      |
| 2620 | 99.19  | 474.30076  |        |                                                                                                                     |             | ION=[M+H+H]2+  |             | 221.69    | 20.33     | 3980.83   | 0.00      |
| 2621 | 99.23  | 310.11763  | NA     | 6-[2-(4-hydroxy-3-nitrophenyl)acetamido]hexanoic acid                                                               | C14H18N2O6  | ION=[M+H]+     | 10463-23-7  | 3670.92   | 219.17    | 377.33    | 325.33    |
| 2622 | 99.26  | 249.08479  | 16.638 | Daniquidone                                                                                                         | C15H11N3O   | ION=[M+H]+     | 67199-66-0  | 1202.31   | 2449.17   | 320.83    | 0.00      |
| 2623 | 100.95 | 496.1912   |        |                                                                                                                     |             | ION=[M+H]+     |             | 11919.54  | 6694.50   | 14687.50  | 16529.67  |
| 2624 | 99.89  | 471.15944  |        |                                                                                                                     |             | ION=[M-H2O+H]+ |             | 7042.77   | 3358.67   | 15117.67  | 8814.00   |
| 2625 | 100.67 | 184.12197  |        |                                                                                                                     |             | ION=[M+H]+     |             | 3082.77   | 815.00    | 1254.67   | 2723.00   |
| 2626 | 99.75  | 498.10686  |        |                                                                                                                     |             | ION=[M+H+H]2+  |             | 13583.23  | 15504.50  | 12555.50  | 19408.33  |
| 2627 | 99.33  | 347.17049  |        |                                                                                                                     |             | ION=[M+H]+     |             | 3757.23   | 1127.00   | 1024.17   | 3527.33   |
| 2628 | 100.29 | 1340.5706  |        |                                                                                                                     |             | ION=[M+H+H]2+  |             | 3173.69   | 1731.67   | 5322.50   | 3782.67   |
| 2629 | 99.59  | 1340.57661 |        |                                                                                                                     |             | ION=[M+H+H]2+  |             | 1448.62   | 690.67    | 2377.00   | 1995.00   |
| 2630 | 101.11 | 127.09936  |        |                                                                                                                     |             | ION=[M+H]+     |             | 373.54    | 0.00      | 4895.50   | 17.00     |
| 2631 | 100.22 | 309.13572  | 14.253 | Fluoxetine                                                                                                          | C17H18F3NO  | ION=[M+H]+     |             | 2145.08   | 101.17    | 350.50    | 550.67    |
| 2632 | 101.17 | 238.09659  | 15.984 | Felbamate                                                                                                           | C11H14N2O4  | ION=[M+H]+     |             | 5070.31   | 253.17    | 1278.33   | 2059.33   |
| 2633 | 99.52  | 203.08128  | 15.923 | 3-amino-4,5,6-trihydroxy-2-methoxy-5-methyl-2-cyclohexen-1-one                                                      | C8H13NO5    | ION=[M+H]+     |             | 2111.08   | 3658.83   | 4921.17   | 2890.67   |
| 2634 | 99.54  | 267.0968   | 3.398  | Vidarabine   Adenosin                                                                                               | C10H13N5O4  | ION=[M+H]+     |             | 107848.31 | 225053.17 | 191551.17 | 261373.67 |
| 2635 | 99.42  | 164.04841  | 17.301 | 2-Hydroxycinnamic acid                                                                                              | C9H8O3      | ION=[M+H]+     |             | 9390.00   | 1185.17   | 4531.17   | 6890.67   |
| 2636 | 101.08 | 187.20623  |        |                                                                                                                     |             | ION=[M+H]+     |             | 811.38    | 10.67     | 16248.33  | 274.67    |
| 2637 | 99.74  | 181.07517  | 12.679 | Tyrosin                                                                                                             | C9H11NO3    | ION=[M+H]+     |             | 44555.85  | 4613.17   | 21114.67  | 32268.00  |
| 2638 | 100.76 | 532.25256  |        |                                                                                                                     |             | ION=[M+H+H]2+  |             | 838.15    | 0.00      | 0.00      | 0.00      |
| 2639 | 99.54  | 176.15995  |        |                                                                                                                     |             | ION=[M+H]+     |             | 2636.46   | 0.00      | 19.83     | 0.00      |
| 2640 | 99.62  | 332.07821  | 13.013 | 2-[4-[(4-hydroxyphenyl)methylidene]-2-[3-(methylsulfanyl)propanoyl]-5-oxo-4,5-dihydro-1h-imidazol-1-yl]acetaldehyde | C16H16N2O4S | ION=[M+H]+     |             | 105.38    | 116.17    | 2147.00   | 674.67    |
| 2641 | 99.74  | 136.03905  |        |                                                                                                                     |             | ION=[M+H]+     |             | 4203.23   | 1602.50   | 0.00      | 1925.67   |
| 2642 | 99.88  | 387.14784  | NA     | 4-[[5-(cyclohexylamino)-[1,2,4]triazolo[1,5-a]pyrimidin-7-yl]amino]benzene-1-sulfonamide                            | C17H21N7O2S | ION=[M+H]+     |             | 1206.62   | 2006.50   | 2334.83   | 490.67    |
| 2643 | 100.08 | 498.10983  |        |                                                                                                                     |             | ION=[M+H]+     |             | 2532.46   | 2602.33   | 2059.50   | 3593.00   |
| 2644 | 100.24 | 403.13599  |        |                                                                                                                     |             | ION=[M+H]+     |             | 1990.00   | 4613.33   | 1146.00   | 0.00      |
| 2645 | 100.62 | 273.16842  | 18.382 | Tilidine                                                                                                            | C17H23NO2   | ION=[M+H]+     |             | 2848.31   | 1494.00   | 623.33    | 952.33    |
| 2646 | 100.3  | 203.13406  | NA     | Aphanorphine                                                                                                        | C13H17NO    | ION=[M+H]+     |             | 2906.62   | 1721.17   | 1217.17   | 2313.67   |
| 2647 | 100.3  | 295.10272  | 16.229 | 7-(hydroxymethyl)-3-phenyl-1,6-dioxo-2-azaspiro[4.5]dec-2-ene-8,9,10-triol                                          | C14H17NO6   | ION=[M+H]+     |             | 2939.38   | 4853.17   | 139.33    | 0.00      |
| 2648 | 100.41 | 371.31406  |        |                                                                                                                     |             | ION=[M+H+H]2+  |             | 60.92     | 156984.33 | 35.83     | 0.00      |
| 2649 | 102.01 | 228.11218  | 9.863  | Bisphenol A                                                                                                         | C15H16O2    | ION=[M+H]+     |             | 2814.15   | 853.83    | 673.33    | 1731.33   |
| 2650 | 100.58 | 442.35157  |        |                                                                                                                     |             | ION=[M+H]+     |             | 7546.00   | 0.00      | 0.00      | 0.00      |
| 2651 | 103.32 | 179.04549  | 12.353 | Isoxanthopterin                                                                                                     | C6H5N5O2    | ION=[M+H]+     |             | 1217.23   | 1573.83   | 7416.67   | 2841.00   |
| 2652 | 101.75 | 257.24664  |        |                                                                                                                     |             | ION=[M+H]+     |             | 4194.00   | 178.83    | 463.67    | 21.67     |
| 2653 | 102.01 | 507.20697  |        |                                                                                                                     |             | ION=[M+H]+     |             | 1610.62   | 1416.17   | 7191.00   | 5724.33   |
| 2654 | 101.4  | 512.26178  |        |                                                                                                                     |             | ION=[M+H]+     |             | 159.08    | 539.83    | 82.67     | 14477.33  |
| 2655 | 101.21 | 424.34142  |        |                                                                                                                     |             | ION=[M+H+H]2+  |             | 9909.38   | 0.00      | 0.00      | 0.00      |
| 2656 | 101.54 | 490.27674  |        |                                                                                                                     |             | ION=[M+H+H]2+  |             | 3664.92   | 0.00      | 0.00      | 0.00      |
| 2657 | 102.3  | 331.06824  | 16.21  | 2'-Deoxyadenosine 5'-monophosphate (dAMP)                                                                           | C10H14N5O6P | ION=[M+H]+     |             | 1292.46   | 5876.83   | 7912.33   | 1062.67   |
| 2658 | 102.27 | 696.21867  |        |                                                                                                                     |             | ION=[M+H]+     |             | 1698.00   | 0.00      | 5056.00   | 1607.67   |
| 2659 | 101.24 | 342.33296  |        |                                                                                                                     |             | ION=[M+H+H]2+  |             | 8400.92   | 0.00      | 0.00      | 0.00      |
| 2660 | 101.18 | 266.12702  | NA     | 2-(2-Oxo-2-[4-(1H-pyrrol-1-yl)piperidino]ethoxy)acetic acid                                                         | C13H18N2O4  | ION=[M+H]+     |             | 10884.15  | 2465.33   | 5073.17   | 10770.00  |
| 2661 | 101.89 | 245.13763  | 18.095 | Tasimelteon                                                                                                         | C15H19NO2   | ION=[M+H]+     | 609799-22-6 | 15275.38  | 3430.83   | 3494.17   | 10269.67  |
| 2662 | 101.4  | 414.28164  | 13.15  | Desoxycortone                                                                                                       | C26H38O4    | ION=[M+H+H]2+  | 808-48-0    | 0.00      | 258.50    | 0.00      | 632498.00 |
| 2663 | 100.45 | 331.177    | NA     | Tetramethrin                                                                                                        | C19H25NO4   | ION=[M+H]+     |             | 1258.77   | 0.00      | 501.83    | 0.00      |

|      |        |           |        |                                                                                                |             |                            |             |            |          |          |           |
|------|--------|-----------|--------|------------------------------------------------------------------------------------------------|-------------|----------------------------|-------------|------------|----------|----------|-----------|
| 2664 | 100.71 | 244.07078 |        |                                                                                                |             | ION=[M+H] <sup>+</sup>     |             | 16156.92   | 7757.83  | 9382.83  | 17862.33  |
| 2665 | 100.93 | 272.0787  |        |                                                                                                |             | ION=[M+H+H] <sup>2+</sup>  |             | 2010.00    | 991.83   | 1068.33  | 2953.33   |
| 2666 | 101.05 | 251.10265 | 17.667 | 2-(2-Hydroxy-Phenyl)-1h-Indole-5-Carboxamide                                                   | C15H13N3O   | ION=[M+H] <sup>+</sup>     | 179748-10-8 | 25469.23   | 37094.67 | 40454.67 | 35238.67  |
| 2667 | 101.97 | 232.14289 | 10.811 | Mebutamate                                                                                     | C10H20N2O4  | ION=[M+H] <sup>+</sup>     |             | 11924.92   | 1920.00  | 2283.00  | 3488.33   |
| 2668 | 102.05 | 530.27105 | 8.997  | (5xi,6alpha,7alpha,9xi,16xi)-16-(beta-D-Glucopyranosyloxy)-6,7,17-trihydroxykauran-19-oic acid | C26H42O11   | ION=[M+H] <sup>+</sup>     |             | 541.38     | 246.17   | 1135.83  | 17180.67  |
| 2669 | 104.21 | 342.33528 |        |                                                                                                |             | ION=[M+H+H] <sup>2+</sup>  |             | 27858.00   | 24.67    | 132.17   | 99.67     |
| 2670 | 105.34 | 155.64742 |        |                                                                                                |             | ION=[M+H] <sup>+</sup>     |             | 9255.54    | 0.00     | 508.17   | 76.33     |
| 2671 | 103.22 | 442.34923 |        |                                                                                                |             | ION=[M+H+H] <sup>2+</sup>  |             | 1071393.38 | 0.00     | 0.00     | 10924.33  |
| 2672 | 102.57 | 414.284   |        |                                                                                                |             | ION=[M+H] <sup>+</sup>     |             | 0.00       | 0.00     | 0.00     | 14888.67  |
| 2673 | 103.3  | 634.21004 |        |                                                                                                |             | ION=[M+H] <sup>+</sup>     |             | 1111.85    | 264.67   | 9693.83  | 1441.33   |
| 2674 | 104.47 | 259.15319 | 10.279 | (tert-butyloxycarbonyl)-alanyl-amino ethyl-formamide                                           | C11H21N3O4  | ION=[M+H] <sup>+</sup>     |             | 15574.31   | 4887.50  | 5217.50  | 7674.67   |
| 2675 | 102.83 | 124.05186 |        |                                                                                                |             | ION=[M+H] <sup>+</sup>     |             | 6.46       | 2964.83  | 17.33    | 19.00     |
| 2676 | 104.09 | 479.20013 |        |                                                                                                |             | ION=[M+H] <sup>+</sup>     |             | 51.08      | 4574.83  | 139.83   | 154.00    |
| 2677 | 103.9  | 319.12844 |        |                                                                                                |             | ION=[M+H] <sup>+</sup>     |             | 0.00       | 2526.50  | 0.00     | 0.00      |
| 2678 | 105.07 | 195.95529 |        |                                                                                                |             | ION=[M+H] <sup>+</sup>     |             | 5759.54    | 12750.83 | 1734.33  | 8175.33   |
| 2679 | 104.46 | 442.35199 |        |                                                                                                |             | ION=[M+H] <sup>+</sup>     |             | 20506.62   | 0.00     | 0.00     | 91.67     |
| 2680 | 103.97 | 241.14317 |        |                                                                                                |             | ION=[M+H] <sup>+</sup>     |             | 2282.31    | 736.50   | 840.33   | 1264.33   |
| 2681 | 104.19 | 282.12179 | 11.538 | Erteberel                                                                                      | C18H18O3    | ION=[M+H] <sup>+</sup>     | 533884-09-2 | 5532.00    | 199.67   | 1072.33  | 3183.00   |
| 2682 | 104.29 | 497.21    | 5.97   | Validamycin A                                                                                  | C20H35NO13  | ION=[M+H] <sup>+</sup>     |             | 72.62      | 28954.67 | 236.83   | 135.00    |
| 2683 | 106.52 | 181.06073 |        |                                                                                                |             | ION=[M-H2O+H] <sup>+</sup> |             | 7985.85    | 4931.67  | 9215.83  | 2230.00   |
| 2684 | 106.33 | 172.07174 |        |                                                                                                |             | ION=[M+H] <sup>+</sup>     |             | 1716.92    | 2392.17  | 2191.67  | 1557.67   |
| 2685 | 106.55 | 345.19227 | NA     | Bevantolol                                                                                     | C20H27NO4   | ION=[M+H] <sup>+</sup>     |             | 1830.92    | 253.17   | 342.00   | 1232.33   |
| 2686 | 106.28 | 278.12982 | 12.824 | 1-phenyl-6-phenylimino-1,3,5-triazine-2,4-diamine                                              | C15H14N6    | ION=[M+H] <sup>+</sup>     |             | 4020.15    | 1105.67  | 918.50   | 2409.67   |
| 2687 | 106.55 | 260.13827 |        |                                                                                                |             | ION=[M+H] <sup>+</sup>     |             | 3900.77    | 1160.50  | 1281.67  | 1924.33   |
| 2688 | 104.37 | 656.23227 |        |                                                                                                |             | ION=[M+H] <sup>+</sup>     |             | 948.46     | 1925.67  | 9058.00  | 1376.00   |
| 2689 | 105.08 | 424.33985 |        |                                                                                                |             | ION=[M+H+H] <sup>2+</sup>  |             | 18876.15   | 0.00     | 0.00     | 132.00    |
| 2690 | 107.06 | 280.10606 |        |                                                                                                |             | ION=[M+H] <sup>+</sup>     |             | 14180.15   | 2960.67  | 4824.50  | 6258.33   |
| 2691 | 106.65 | 232.14288 | 8.855  | Mebutamate                                                                                     | C10H20N2O4  | ION=[M+H] <sup>+</sup>     |             | 28555.54   | 9629.83  | 8098.17  | 15466.00  |
| 2692 | 106.25 | 308.95498 |        |                                                                                                |             | ION=[M+H] <sup>+</sup>     |             | 1701.69    | 2076.83  | 1992.00  | 270.67    |
| 2693 | 104.95 | 131.09425 | 12.919 | Leucine                                                                                        | C6H13NO2    | ION=[M+H] <sup>+</sup>     |             | 2416.46    | 717.67   | 1229.67  | 1877.67   |
| 2694 | 104.57 | 442.34736 |        |                                                                                                |             | ION=[M+H+H] <sup>2+</sup>  |             | 550852.31  | 0.00     | 0.00     | 0.00      |
| 2695 | 104.67 | 202.13299 | 6.985  | Glutamine T-Butyl Ester                                                                        | C9H18N2O3   | ION=[M+H] <sup>+</sup>     | 39741-62-3  | 17763.08   | 4905.33  | 5326.50  | 15059.67  |
| 2696 | 104.77 | 152.03337 | 8.065  | Xanthine                                                                                       | C5H4N4O2    | ION=[M+H] <sup>+</sup>     |             | 2392.15    | 11903.17 | 1800.17  | 3225.67   |
| 2697 | 105.22 | 188.1174  | 10.71  | Glycyl-L-leucine                                                                               | C8H16N2O3   | ION=[M+H] <sup>+</sup>     |             | 9610.62    | 2123.50  | 3265.33  | 4299.67   |
| 2698 | 106.58 | 257.24641 |        |                                                                                                |             | ION=[M+H] <sup>+</sup>     |             | 1685.08    | 0.00     | 41.83    | 0.00      |
| 2699 | 106.6  | 214.0101  |        |                                                                                                |             | ION=[M+H] <sup>+</sup>     |             | 6270.77    | 9391.67  | 5693.83  | 301.67    |
| 2700 | 106.82 | 715.37576 |        |                                                                                                |             | ION=[M+H+H] <sup>2+</sup>  |             | 312.92     | 119.00   | 29.83    | 6771.33   |
| 2701 | 106.01 | 150.08925 | 5.885  | Triethylene glycol                                                                             | C6H14O4     | ION=[M+H] <sup>+</sup>     |             | 2028.15    | 2428.67  | 1851.67  | 5264.67   |
| 2702 | 108.36 | 302.18449 | 7.484  | Formestane                                                                                     | C19H26O3    | ION=[M+H] <sup>+</sup>     | 566-48-3    | 5785.54    | 0.00     | 0.00     | 0.00      |
| 2703 | 107.09 | 1009.4376 |        |                                                                                                |             | ION=[M+H+H] <sup>2+</sup>  |             | 616.15     | 50.67    | 2683.33  | 52.33     |
| 2704 | 108.46 | 538.34038 |        |                                                                                                |             | ION=[M+H] <sup>+</sup>     |             | 7494.62    | 0.00     | 0.00     | 0.00      |
| 2705 | 108.1  | 715.37332 |        |                                                                                                |             | ION=[M+H+H2] <sup>3+</sup> |             | 0.00       | 0.00     | 0.00     | 24543.33  |
| 2706 | 107.68 | 281.07719 | NA     | Nitrazepam                                                                                     | C15H11N3O3  | ION=[M+H] <sup>+</sup>     |             | 0.00       | 1953.00  | 430.67   | 4411.33   |
| 2707 | 107.13 | 428.33343 |        |                                                                                                |             | ION=[M+H+H] <sup>2+</sup>  |             | 1826.92    | 0.00     | 0.00     | 0.00      |
| 2708 | 107.4  | 247.12453 |        |                                                                                                |             | ION=[M+H] <sup>+</sup>     |             | 0.00       | 0.00     | 0.00     | 1010.67   |
| 2709 | 106.77 | 290.94402 |        |                                                                                                |             | ION=[M+H] <sup>+</sup>     |             | 3460.00    | 4317.33  | 4417.33  | 587.00    |
| 2710 | 107.39 | 197.05606 | 12.176 | Aplodan                                                                                        | C4H12N3O4P  | ION=[M+H] <sup>+</sup>     |             | 0.00       | 0.00     | 2322.00  | 92.00     |
| 2711 | 107.44 | 292.09097 | NA     | Ethylenediaminetetraacetic acid                                                                | C10H16N2O8  | ION=[M+H] <sup>+</sup>     |             | 5448.46    | 7340.83  | 3333.83  | 7860.00   |
| 2712 | 110.9  | 496.19056 |        |                                                                                                |             | ION=[M+H] <sup>+</sup>     |             | 87743.69   | 61235.00 | 98724.33 | 130000.00 |
| 2713 | 109.18 | 293.11085 |        |                                                                                                |             | ION=[M+H] <sup>+</sup>     |             | 62754.31   | 18684.33 | 57023.50 | 83882.00  |
| 2714 | 109.01 | 586.22357 |        |                                                                                                |             | ION=[M+Na] <sup>+</sup>    |             | 8194.62    | 2389.17  | 10197.17 | 78.33     |
| 2715 | 109.81 | 232.10666 | 12.356 | N <sup>2</sup> -(3-Carboxy-1-hydroxypropylidene)ornithine                                      | C9H16N2O5   | ION=[M+Na] <sup>+</sup>    | 80102-04-1  | 1039.38    | 551.00   | 6138.50  | 75.33     |
| 2716 | 110.74 | 203.0808  |        |                                                                                                |             | ION=[M+H] <sup>+</sup>     |             | 5208.77    | 4578.67  | 6817.33  | 5945.33   |
| 2717 | 110.49 | 248.09393 | NA     | Sudan I                                                                                        | C16H12N2O   | ION=[M+H] <sup>+</sup>     |             | 0.00       | 809.17   | 0.00     | 0.00      |
| 2718 | 109.03 | 236.11704 | 14.557 | Carbetamide                                                                                    | C12H16N2O3  | ION=[M+H] <sup>+</sup>     | 16118-49-3  | 11163.85   | 3619.50  | 5456.50  | 4370.33   |
| 2719 | 110.2  | 185.06988 |        |                                                                                                |             | ION=[M+H] <sup>+</sup>     |             | 6645.69    | 3344.83  | 6945.67  | 9077.00   |
| 2720 | 108.72 | 248.11906 |        |                                                                                                |             | ION=[M+H] <sup>+</sup>     |             | 2024.77    | 1029.83  | 2646.00  | 2220.00   |
| 2721 | 109.26 | 547.19996 |        |                                                                                                |             | ION=[M+H] <sup>+</sup>     |             | 720.31     | 267.17   | 3399.17  | 0.00      |
| 2722 | 110.88 | 518.17285 |        |                                                                                                |             | ION=[M+H] <sup>+</sup>     |             | 12586.62   | 17427.50 | 22499.17 | 1861.00   |
| 2723 | 112.11 | 294.11885 | 10.997 | Aspartame                                                                                      | C14H18N2O5  | ION=[M+H] <sup>+</sup>     |             | 10908.77   | 2902.67  | 5824.17  | 11058.33  |
| 2724 | 111.73 | 268.08117 | 6.895  | 2-(7-hydroxy-1h-pyrazolo[4,3-d]pyrimidin-3-yl)-5-(hydroxymethyl)oxolane-3,4-diol               | C10H12N4O5  | ION=[M+H] <sup>+</sup>     |             | 28272.92   | 3017.00  | 22268.50 | 13935.00  |
| 2725 | 111.4  | 656.23119 |        |                                                                                                |             | ION=[M+H] <sup>+</sup>     |             | 2751.69    | 4046.50  | 13246.17 | 7834.33   |
| 2726 | 112.42 | 222.10161 | NA     | Buthionine Sulfoxime                                                                           | C8H18N2O3S  | ION=[M+H] <sup>+</sup>     |             | 8701.38    | 2426.83  | 3909.50  | 2382.33   |
| 2727 | 111.42 | 347.06397 | 17.676 | 2'-Deoxyguanosine 5'-phosphate                                                                 | C10H14N5O7P | ION=[M+H] <sup>+</sup>     |             | 1875.08    | 29611.33 | 17726.33 | 4153.67   |
| 2728 | 111.38 | 137.04687 | 12.476 | Sunbrella                                                                                      | C7H7NO2     | ION=[M+H] <sup>+</sup>     |             | 4319.69    | 1703.50  | 3779.00  | 4548.67   |
| 2729 | 109.51 | 285.07693 |        |                                                                                                |             | ION=[M+H] <sup>+</sup>     |             | 1004.92    | 0.00     | 0.00     | 0.00      |
| 2730 | 111.77 | 136.03818 |        |                                                                                                |             | ION=[M+H] <sup>+</sup>     |             | 38049.69   | 3276.67  | 31329.67 | 6805.33   |
| 2731 | 110.96 | 444.04284 |        |                                                                                                |             | ION=[M+H+H] <sup>2+</sup>  |             | 0.00       | 1328.50  | 589.00   | 0.00      |



|      |        |            |        |                                                                                        |             |                            |             |          |           |           |          |
|------|--------|------------|--------|----------------------------------------------------------------------------------------|-------------|----------------------------|-------------|----------|-----------|-----------|----------|
| 2732 | 111.38 | 363.07981  |        |                                                                                        |             | ION=[M+H] <sup>+</sup>     |             | 0.00     | 1190.83   | 0.00      | 0.00     |
| 2733 | 110.88 | 496.18936  |        |                                                                                        |             | ION=[M+H+H] <sup>2+</sup>  |             | 4113.08  | 2315.33   | 3736.17   | 5074.00  |
| 2734 | 111.93 | 272.07635  |        |                                                                                        |             | ION=[M+H+H] <sup>2+</sup>  |             | 656.46   | 718.83    | 0.00      | 14270.00 |
| 2735 | 112.32 | 243.12316  |        |                                                                                        |             | ION=[M+H] <sup>+</sup>     |             | 247.85   | 813.50    | 479.17    | 7780.33  |
| 2736 | 115.03 | 283.09166  | 11.679 | Guanosine                                                                              | C10H13N5O5  | ION=[M+H] <sup>+</sup>     |             | 56001.38 | 51726.33  | 46965.17  | 18945.00 |
| 2737 | 114.13 | 230.16383  | 8.21   | Tert-butyl N-(1-amino-4-methyl-1-oxopentan-2-yl)carbamate                              | C11H22N2O3  | ION=[M+H] <sup>+</sup>     | 70533-96-9  | 22004.62 | 6252.33   | 5157.17   | 4222.67  |
| 2738 | 114.8  | 151.04948  | 2.6    | Guanine                                                                                | C5H5N5O     | ION=[M+H] <sup>+</sup>     |             | 31933.38 | 30023.83  | 23667.50  | 10833.33 |
| 2739 | 112.38 | 242.12749  | 7.047  | 2,4-Diamino-6-Phenyl-5,6,7,8-Tetrahydropteridine                                       | C12H14N6    | ION=[M+H] <sup>+</sup>     |             | 4057.08  | 1868.33   | 1789.00   | 1487.33  |
| 2740 | 116.33 | 157.95359  |        |                                                                                        |             | ION=[M+H] <sup>+</sup>     |             | 4956.77  | 5433.33   | 5451.00   | 1157.00  |
| 2741 | 116.33 | 185.95006  |        |                                                                                        |             | ION=[M+H] <sup>+</sup>     |             | 6584.77  | 5471.50   | 5466.00   | 1651.33  |
| 2742 | 114.88 | 228.14781  | 8.357  | 4-((cyclohexylamino)carbonyl)aminobutanoic acid                                        | C11H20N2O3  | ION=[M+H] <sup>+</sup>     | 511552-46-8 | 9856.31  | 1481.83   | 14854.67  | 1767.00  |
| 2743 | 113.5  | 262.08042  | 1.776  | 8,9,10-trihydroxy-7-(hydroxymethyl)-3-methyl-6-oxa-1,3-diazaspiro[4.5]decane-2,4-dione | C9H14N2O7   | ION=[M+H] <sup>+</sup>     |             | 13887.69 | 25709.83  | 21904.17  | 31320.33 |
| 2744 | 116.34 | 265.08191  | 8.36   | 4-(Trifluoromethyl)-5,6-dihydrobenzo[H]quinazolin-2-amine                              | C13H10F3N3  | ION=[M+H] <sup>+</sup>     |             | 0.00     | 1977.50   | 319.67    | 907.00   |
| 2745 | 115.01 | 260.13783  | 4.877  | 4-[5-(hydroxymethyl)-8-methyl-3-oxabicyclo[3.3.1]non-7-en-2-yl]phenol                  | C16H20O3    | ION=[M+H] <sup>+</sup>     |             | 7235.08  | 2666.67   | 2377.17   | 1514.67  |
| 2746 | 117.66 | 345.1898   |        |                                                                                        |             | ION=[M+H] <sup>+</sup>     |             | 1575.54  | 209.67    | 355.83    | 488.67   |
| 2747 | 120.64 | 442.35078  |        |                                                                                        |             | ION=[M+H+H] <sup>2+</sup>  |             | 90174.77 | 112.17    | 0.00      | 481.67   |
| 2748 | 119.51 | 405.29849  |        |                                                                                        |             | ION=[M+H+H] <sup>2+</sup>  |             | 29.85    | 43892.33  | 0.00      | 0.00     |
| 2749 | 117.95 | 195.64159  |        |                                                                                        |             | ION=[M+H] <sup>+</sup>     |             | 8.15     | 1615.83   | 0.00      | 0.00     |
| 2750 | 120.53 | 159.08994  | 6.708  | N-Acetylvaline                                                                         | C7H13NO3    | ION=[M+H] <sup>+</sup>     |             | 0.00     | 8.33      | 8.83      | 10466.33 |
| 2751 | 119.17 | 174.01718  | NA     | trans-Aconitic acid                                                                    | C6H6O6      | ION=[M+Na] <sup>+</sup>    |             | 1764.31  | 1842.33   | 2434.17   | 0.00     |
| 2752 | 121.21 | 324.03605  | 12.134 | Uridine monophosphate                                                                  | C9H13N2O9P  | ION=[M+H] <sup>+</sup>     |             | 773.85   | 2524.67   | 4021.83   | 1786.33  |
| 2753 | 119.58 | 271.00022  |        |                                                                                        |             | ION=[M+H] <sup>+</sup>     |             | 1827.23  | 1967.50   | 2772.17   | 0.00     |
| 2754 | 121.66 | 616.19969  | 11.442 | Polyoxin A                                                                             | C23H32N6O14 | ION=[M+H] <sup>+</sup>     |             | 44.46    | 4143.33   | 293.67    | 65.67    |
| 2755 | 120.58 | 246.12169  |        |                                                                                        |             | ION=[M+H] <sup>+</sup>     |             | 99307.38 | 159127.67 | 262684.83 | 55978.67 |
| 2756 | 121.69 | 222.02269  |        |                                                                                        |             | ION=[M+H] <sup>+</sup>     |             | 6.77     | 1311.00   | 689.67    | 0.00     |
| 2757 | 121.83 | 444.04437  |        |                                                                                        |             | ION=[M+H+H] <sup>2+</sup>  |             | 0.00     | 1425.17   | 0.00      | 0.00     |
| 2758 | 121.06 | 329.05273  | 3.87   | Adenosine 3'5'-cyclic monophosphate                                                    | C10H12N5O6P | ION=[M+H] <sup>+</sup>     |             | 345.69   | 26659.33  | 5948.00   | 1574.33  |
| 2759 | 123.69 | 715.37541  |        |                                                                                        |             | ION=[M+H+H] <sup>2+</sup>  |             | 34.92    | 49.17     | 43.00     | 4347.67  |
| 2760 | 124.3  | 136.03837  | 3.453  | Hypoxanthine                                                                           | C5H4N4O     | ION=[M+H] <sup>+</sup>     |             | 5034.46  | 747.67    | 3671.17   | 4121.00  |
| 2761 | 127.15 | 347.06301  | 9.354  | 2'-Deoxyguanosine 5'-phosphate                                                         | C10H14N5O7P | ION=[M+H] <sup>+</sup>     |             | 719.08   | 2880.83   | 5167.33   | 7544.67  |
| 2762 | 127.06 | 151.04949  | 3.962  | Guanine                                                                                | C5H5N5O     | ION=[M+H] <sup>+</sup>     |             | 8431.38  | 4030.67   | 6748.50   | 8639.00  |
| 2763 | 127.27 | 267.09708  | 13.043 | Vidarabine   Adenosin                                                                  | C10H13N5O4  | ION=[M+H] <sup>+</sup>     |             | 4916.77  | 2365.83   | 3720.67   | 4650.67  |
| 2764 | 128.91 | 474.30249  |        |                                                                                        |             | ION=[M+H+H] <sup>2+</sup>  |             | 373.38   | 21.33     | 8720.17   | 0.00     |
| 2765 | 127.86 | 187.20626  |        |                                                                                        |             | ION=[M+H] <sup>+</sup>     |             | 197.85   | 25.33     | 3651.17   | 29.00    |
| 2766 | 129.2  | 230.1637   | 2.617  | Tert-butyl N-(1-amino-4-methyl-1-oxopentan-2-yl)carbamate                              | C11H22N2O3  | ION=[M+H] <sup>+</sup>     | 70533-96-9  | 22546.62 | 3576.67   | 4119.67   | 13922.00 |
| 2767 | 131.51 | 252.1115   | 2.594  | Alanyltyrosine                                                                         | C12H16N2O4  | ION=[M+H] <sup>+</sup>     |             | 4177.69  | 738.33    | 1436.17   | 2925.00  |
| 2768 | 131.73 | 232.0708   | 10.576 | Kifunensine                                                                            | C8H12N2O6   | ION=[M+H] <sup>+</sup>     | 109944-15-2 | 130.46   | 31.67     | 2442.50   | 784.33   |
| 2769 | 132.83 | 248.09037  |        |                                                                                        |             | ION=[M+H] <sup>+</sup>     |             | 0.00     | 2697.67   | 0.00      | 0.00     |
| 2770 | 133.48 | 791.31041  |        |                                                                                        |             | ION=[M+H] <sup>+</sup>     |             | 0.00     | 0.00      | 0.00      | 13208.33 |
| 2771 | 133.43 | 244.179    |        |                                                                                        |             | ION=[M+H] <sup>+</sup>     |             | 93.23    | 3464.33   | 0.00      | 0.00     |
| 2772 | 134.81 | 1009.43772 |        |                                                                                        |             | ION=[M+H+H] <sup>2+</sup>  |             | 3165.08  | 343.67    | 10174.83  | 333.67   |
| 2773 | 137.07 | 345.00237  |        |                                                                                        |             | ION=[M+H] <sup>+</sup>     |             | 6172.62  | 9752.17   | 4606.00   | 17204.67 |
| 2774 | 138.58 | 222.10151  | NA     | Buthionine Sulfoxime                                                                   | C8H18N2O3S  | ION=[M+H] <sup>+</sup>     |             | 3106.00  | 532.83    | 894.67    | 1736.67  |
| 2775 | 138.78 | 228.14838  | 8.105  | 4-((cyclohexylamino)carbonyl)aminobutanoic acid                                        | C11H20N2O3  | ION=[M+H] <sup>+</sup>     | 511552-46-8 | 6000.00  | 408.83    | 2133.00   | 5279.67  |
| 2776 | 139.41 | 292.09079  | 1.585  | Ethylenediaminetetraacetic acid                                                        | C10H16N2O8  | ION=[M+H] <sup>+</sup>     |             | 7188.92  | 21591.33  | 4050.50   | 25689.67 |
| 2777 | 140.53 | 194.11601  | 12.238 | N'',N'''-Di-(1E,2E)-2-buten-1-ylidenecarbonohydrazide                                  | C9H14N4O    | ION=[M+H] <sup>+</sup>     |             | 7487.23  | 4762.00   | 3705.67   | 12684.67 |
| 2778 | 141.9  | 206.04427  | 7.663  | 1-hydroxy-1-methylpropane-1,2,3-tricarboxylic acid                                     | C7H10O7     | ION=[M+H] <sup>+</sup>     | 71183-66-9  | 3820.31  | 1585.50   | 6214.00   | 4631.00  |
| 2779 | 140.51 | 234.08623  |        |                                                                                        |             | ION=[M+H] <sup>+</sup>     |             | 5078.15  | 10138.83  | 5102.50   | 12124.33 |
| 2780 | 141.85 | 244.1788   |        |                                                                                        |             | ION=[M+H] <sup>+</sup>     |             | 5203.69  | 1373.17   | 0.00      | 0.00     |
| 2781 | 142.21 | 297.08331  |        |                                                                                        |             | ION=[M+H] <sup>+</sup>     |             | 2959.85  | 692.50    | 1873.67   | 1136.00  |
| 2782 | 145.24 | 275.10064  | 14.133 | 5'-deoxytyocamycin                                                                     | C12H13N5O3  | ION=[M+H] <sup>+</sup>     |             | 30672.31 | 4778.17   | 12367.00  | 24280.67 |
| 2783 | 147.25 | 324.03593  | 3.839  | Uridine monophosphate                                                                  | C9H13N2O9P  | ION=[M-H2O+H] <sup>+</sup> |             | 96.92    | 3983.33   | 1129.00   | 1451.33  |
| 2784 | 147.68 | 616.1992   | 9.321  | Polyoxin A                                                                             | C23H32N6O14 | ION=[M+H] <sup>+</sup>     |             | 10609.08 | 11.67     | 26729.17  | 9306.67  |
| 2785 | 148.83 | 228.14867  |        |                                                                                        |             | ION=[M+H] <sup>+</sup>     |             | 6101.08  | 622.00    | 2013.17   | 4634.33  |
| 2786 | 149.88 | 230.16369  |        |                                                                                        |             | ION=[M+H] <sup>+</sup>     |             | 18658.15 | 4141.67   | 15851.83  | 12326.33 |
| 2787 | 150.89 | 345.00239  |        |                                                                                        |             | ION=[M+H] <sup>+</sup>     |             | 5588.92  | 5981.83   | 3936.33   | 3631.67  |
| 2788 | 151.37 | 292.09078  | 3.738  | Ethylenediaminetetraacetic acid                                                        | C10H16N2O8  | ION=[M+H] <sup>+</sup>     |             | 8387.54  | 6599.67   | 5338.33   | 13125.67 |
| 2789 | 154.61 | 216.09951  | 16.943 | 4-Oxosebacic Acid                                                                      | C10H16O5    | ION=[M+H] <sup>+</sup>     | 114212-45-2 | 340.31   | 3274.50   | 220.17    | 152.67   |
| 2790 | 155.12 | 234.08617  |        |                                                                                        |             | ION=[M+H] <sup>+</sup>     |             | 10104.15 | 11774.50  | 8346.67   | 21640.00 |
| 2791 | 158.98 | 214.00983  |        |                                                                                        |             | ION=[M+H] <sup>+</sup>     |             | 704.00   | 1764.67   | 3169.00   | 346.33   |
| 2792 | 159.71 | 1705.701   |        |                                                                                        |             | ION=[M+H+H2] <sup>3+</sup> |             | 1565.38  | 776.33    | 1555.00   | 1973.33  |
| 2793 | 160.1  | 208.09577  | 6.16   | 2-butyl-1h,4h,5h,6h,7h-imidazo[4,5-d]pyridazine-4,7-dione                              | C9H12N4O2   | ION=[M+H] <sup>+</sup>     | 140199-54-8 | 2457.23  | 969.00    | 454.17    | 3953.33  |



|      |        |           |        |                                                                                                                                                            |             |                                         |            |          |          |           |          |
|------|--------|-----------|--------|------------------------------------------------------------------------------------------------------------------------------------------------------------|-------------|-----------------------------------------|------------|----------|----------|-----------|----------|
| 2794 | 161.23 | 244.17883 |        |                                                                                                                                                            |             | ION=[M+H] <sup>+</sup>                  |            | 34904.00 | 67.50    | 6753.17   | 0.00     |
| 2795 | 161.31 | 174.01826 | 3.928  | trans-Aconitic acid                                                                                                                                        | C6H6O6      | ION=[M+Na] <sup>+</sup>                 |            | 140.31   | 19258.67 | 43337.33  | 31.33    |
| 2796 | 161.62 | 403.98887 |        |                                                                                                                                                            |             | ION=[M+H+H] <sup>2+</sup>               |            | 98.31    | 2687.67  | 4078.00   | 60.33    |
| 2797 | 161.7  | 230.1639  | 8.409  | Tert-butyl N-(1-amino-4-methyl-1-oxopentan-2-yl)carbamate                                                                                                  | C11H22N2O3  | ION=[M+H] <sup>+</sup>                  | 70533-96-9 | 657.54   | 68.50    | 35761.67  | 1318.67  |
| 2798 | 161.33 | 559.99724 |        |                                                                                                                                                            |             | ION=[M+H] <sup>+</sup>                  |            | 0.00     | 5452.50  | 13207.17  | 0.00     |
| 2799 | 161.33 | 268.96198 |        |                                                                                                                                                            |             | ION=[M+H] <sup>+</sup>                  |            | 0.00     | 2480.17  | 3195.83   | 0.00     |
| 2800 | 160.76 | 271.0002  |        |                                                                                                                                                            |             | ION=[M+H] <sup>+</sup>                  |            | 215.23   | 2427.50  | 2960.83   | 0.00     |
| 2801 | 161.65 | 401.95203 |        |                                                                                                                                                            |             | ION=[M+H] <sup>+</sup>                  |            | 21.54    | 2994.00  | 5718.33   | 0.00     |
| 2802 | 161.31 | 421.99988 |        |                                                                                                                                                            |             | ION=[M+H+H] <sup>2+</sup>               |            | 12.00    | 2178.50  | 3866.00   | 0.00     |
| 2803 | 161.16 | 385.97854 |        |                                                                                                                                                            |             | ION=[M+H] <sup>+</sup>                  |            | 25.38    | 1729.17  | 2457.50   | 55.00    |
| 2804 | 163.8  | 286.97259 |        |                                                                                                                                                            |             | ION=[M+H] <sup>+</sup>                  |            | 214.62   | 2110.00  | 2703.50   | 0.00     |
| 2805 | 165.87 | 599.24655 | 10.998 | 2-(carboxymethoxy)-5-[2-[2-(3-carboxypropanamido)-3-phenylpropanamido]-2-(pentylcarbamoyl)ethyl]benzoic acid                                               | C30H37N3O10 | ION=[M+H] <sup>+</sup>                  |            | 38.31    | 9677.17  | 0.00      | 0.00     |
| 2806 | 166.24 | 258.19434 | 5.918  | Elaiomycin                                                                                                                                                 | C13H26N2O3  | ION=[M+H] <sup>+</sup>                  |            | 90832.00 | 65745.17 | 32.50     | 503.00   |
| 2807 | 166.29 | 432.34324 |        |                                                                                                                                                            |             | ION=[M+H+H] <sup>2+</sup>               |            | 0.00     | 1939.00  | 18.50     | 0.00     |
| 2808 | 168.56 | 271.00031 |        |                                                                                                                                                            |             | ION=[M+H] <sup>+</sup>                  |            | 55.54    | 1955.67  | 1970.17   | 97.00    |
| 2809 | 171.16 | 1705.7017 |        |                                                                                                                                                            |             | ION=[M+H+H] <sup>2</sup> 3 <sup>+</sup> |            | 1028.62  | 134.33   | 1232.67   | 2334.00  |
| 2810 | 177.99 | 258.19422 | 3.147  | Elaiomycin                                                                                                                                                 | C13H26N2O3  | ION=[M+H] <sup>+</sup>                  |            | 62645.08 | 664.17   | 1077.00   | 375.33   |
| 2811 | 181.82 | 185.94993 |        |                                                                                                                                                            |             | ION=[M+H] <sup>+</sup>                  |            | 5906.31  | 7597.00  | 3558.00   | 3240.00  |
| 2812 | 183.87 | 432.34593 |        |                                                                                                                                                            |             | ION=[M+H+H] <sup>2+</sup>               |            | 7.54     | 1589.00  | 0.00      | 0.00     |
| 2813 | 186.1  | 260.08388 | 13.697 | Diethyl 4-methoxyphenyl phosphate                                                                                                                          | C11H17O5P   | ION=[M+H] <sup>+</sup>                  |            | 0.00     | 3018.33  | 0.00      | 0.00     |
| 2814 | 190.27 | 432.34566 |        |                                                                                                                                                            |             | ION=[M+H+H] <sup>2+</sup>               |            | 0.00     | 2037.83  | 0.00      | 0.00     |
| 2815 | 193.15 | 294.15869 | 0.424  | Cyclocarbamide B                                                                                                                                           | C15H22N2O4  | ION=[M+H] <sup>+</sup>                  |            | 3900.15  | 52.33    | 704.67    | 494.67   |
| 2816 | 198.99 | 345.04774 | 5.699  | Cyclic guanosine monophosphate                                                                                                                             | C10H12N5O7P | ION=[M+H] <sup>+</sup>                  |            | 385.69   | 15806.33 | 4184.33   | 0.00     |
| 2817 | 204.26 | 599.24091 | 5.003  | Methyl 4-[[4-(dimethylamino)-5-hydroxy-6-methyloxan-2-yl]oxy]-2-ethyl-2,5,12-trihydroxy-7-methoxy-6,11-dioxo-1,2,3,4,6,11-hexahydrotetracene-1-carboxylate | C31H37NO11  | ION=[M+H+H] <sup>2+</sup>               |            | 50.77    | 8467.17  | 4.33      | 0.00     |
| 2818 | 204.76 | 185.94971 |        |                                                                                                                                                            |             | ION=[M+H] <sup>+</sup>                  |            | 6164.92  | 4896.67  | 3614.67   | 3265.67  |
| 2819 | 207.24 | 240.99207 |        |                                                                                                                                                            |             | ION=[M+H] <sup>+</sup>                  |            | 53.85    | 44.00    | 1520.50   | 222.00   |
| 2820 | 207.66 | 363.0583  | 5.621  | 5'-Guanylic acid                                                                                                                                           | C10H14N5O8P | ION=[M+H] <sup>+</sup>                  |            | 49.23    | 1114.83  | 2113.00   | 172.33   |
| 2821 | 210.02 | 599.24033 | 9.05   | Methyl 4-[[4-(dimethylamino)-5-hydroxy-6-methyloxan-2-yl]oxy]-2-ethyl-2,5,12-trihydroxy-7-methoxy-6,11-dioxo-1,2,3,4,6,11-hexahydrotetracene-1-carboxylate | C31H37NO11  | ION=[M+H+H] <sup>2+</sup>               |            | 98.77    | 35530.50 | 0.00      | 19.00    |
| 2822 | 209.16 | 242.07301 | 1.989  | N-(4-sulfamoylphenethyl)acetamide                                                                                                                          | C10H14N2O3S | ION=[M+H] <sup>+</sup>                  | 41472-49-5 | 313.85   | 25827.00 | 0.00      | 155.00   |
| 2823 | 209.84 | 599.24617 | 3.424  | 2-(carboxymethoxy)-5-[2-[2-(3-carboxypropanamido)-3-phenylpropanamido]-2-(pentylcarbamoyl)ethyl]benzoic acid                                               | C30H37N3O10 | ION=[M+H] <sup>+</sup>                  |            | 35.54    | 13409.00 | 18.33     | 9.67     |
| 2824 | 211.19 | 260.13712 | 18.287 | 4-[5-(hydroxymethyl)-8-methyl-3-oxabicyclo[3.3.1]non-7-en-2-yl]phenol                                                                                      | C16H20O3    | ION=[M+H] <sup>+</sup>                  |            | 1796.00  | 189.00   | 20859.33  | 1958.33  |
| 2825 | 211.39 | 345.04501 | 18.137 | Cyclic guanosine monophosphate                                                                                                                             | C10H12N5O7P | ION=[M+H] <sup>+</sup>                  |            | 0.00     | 2835.50  | 48.17     | 1163.00  |
| 2826 | 212.91 | 131.09423 | 4.283  | Leucine                                                                                                                                                    | C6H13NO2    | ION=[M+H] <sup>+</sup>                  |            | 1295.54  | 1950.00  | 3247.17   | 269.33   |
| 2827 | 215.95 | 187.06452 | 1.454  | Indole-3-acrylic acid                                                                                                                                      | C11H9NO2    | ION=[M+H] <sup>+</sup>                  |            | 6156.31  | 2222.50  | 4180.00   | 1280.00  |
| 2828 | 218.28 | 204.09113 |        |                                                                                                                                                            |             | ION=[M+H] <sup>+</sup>                  |            | 10325.23 | 3175.50  | 6745.33   | 3561.67  |
| 2829 | 219.32 | 294.15794 | 7.551  | Cyclocarbamide B                                                                                                                                           | C15H22N2O4  | ION=[M+H] <sup>+</sup>                  |            | 3690.31  | 258.00   | 939.33    | 618.67   |
| 2830 | 219.48 | 260.13704 | 6.304  | Gaburedin B                                                                                                                                                | C11H20N2O5  | ION=[M+H] <sup>+</sup>                  |            | 74735.54 | 99390.33 | 136467.67 | 74694.33 |
| 2831 | 219.8  | 240.99181 |        |                                                                                                                                                            |             | ION=[M+H] <sup>+</sup>                  |            | 77.23    | 35.33    | 1688.67   | 216.67   |
| 2832 | 220.1  | 185.94967 |        |                                                                                                                                                            |             | ION=[M+H] <sup>+</sup>                  |            | 7677.38  | 7934.17  | 7979.33   | 3827.00  |
| 2833 | 225.5  | 294.15823 | 2.876  | Cyclocarbamide B                                                                                                                                           | C15H22N2O4  | ION=[M+H] <sup>+</sup>                  |            | 3814.31  | 209.50   | 415.50    | 2880.33  |
| 2834 | 227.91 | 204.09115 | NA     | Ethotoin                                                                                                                                                   | C11H12N2O2  | ION=[M+H] <sup>+</sup>                  | 86-35-1    | 1297.69  | 895.83   | 1108.67   | 1900.00  |
| 2835 | 235.43 | 242.07288 | 7.854  | N-(4-sulfamoylphenethyl)acetamide                                                                                                                          | C10H14N2O3S | ION=[M+H] <sup>+</sup>                  | 41472-49-5 | 159.23   | 9905.00  | 0.00      | 99.67    |
| 2836 | 237.48 | 240.99219 |        |                                                                                                                                                            |             | ION=[M+H] <sup>+</sup>                  |            | 163.38   | 74.00    | 2490.83   | 233.00   |
| 2837 | 238.9  | 297.08973 | 2.751  | 5'-Methylthioadenosine                                                                                                                                     | C11H15N5O3S | ION=[M+H] <sup>+</sup>                  | 2457-80-9  | 13825.85 | 12885.00 | 19802.00  | 14398.67 |
| 2838 | 242.35 | 260.13719 | 3.545  | Gaburedin B                                                                                                                                                | C11H20N2O5  | ION=[M+H] <sup>+</sup>                  |            | 71710.77 | 71631.00 | 118912.17 | 74944.67 |
| 2839 | 245.91 | 244.17894 |        |                                                                                                                                                            |             | ION=[M+H] <sup>+</sup>                  |            | 24684.15 | 4144.50  | 7386.33   | 14776.67 |
| 2840 | 246.19 | 297.08937 | 13.632 | 5'-Methylthioadenosine                                                                                                                                     | C11H15N5O3S | ION=[M+H] <sup>+</sup>                  | 2457-80-9  | 21.38    | 2533.00  | 241.50    | 250.67   |
| 2841 | 259.06 | 504.36612 |        |                                                                                                                                                            |             | ION=[M+H+H] <sup>2+</sup>               |            | 0.00     | 64750.83 | 0.00      | 0.00     |
| 2842 | 262.5  | 750.38572 |        |                                                                                                                                                            |             | ION=[M+H+H] <sup>2+</sup>               |            | 1303.85  | 2420.33  | 461.17    | 847.67   |
| 2843 | 265.89 | 292.17862 | 13.122 | Carteolol                                                                                                                                                  | C16H24N2O3  | ION=[M+H] <sup>+</sup>                  | 51781-06-7 | 3116.46  | 563.83   | 174.00    | 301.33   |
| 2844 | 268.64 | 244.17899 |        |                                                                                                                                                            |             | ION=[M+H] <sup>+</sup>                  |            | 42734.46 | 10000.50 | 11776.50  | 38785.67 |
| 2845 | 270.62 | 540.32259 |        |                                                                                                                                                            |             | ION=[M+H+H] <sup>2+</sup>               |            | 0.00     | 1064.50  | 308.00    | 592.33   |
| 2846 | 270.22 | 270.16096 |        |                                                                                                                                                            |             | ION=[M+H] <sup>+</sup>                  |            | 0.00     | 511.00   | 0.00      | 0.00     |
| 2847 | 270.78 | 540.3269  |        |                                                                                                                                                            |             | ION=[M+H] <sup>+</sup>                  |            | 0.00     | 2092.67  | 234.50    | 354.00   |
| 2848 | 271.33 | 299.25762 |        |                                                                                                                                                            |             | ION=[M+H] <sup>+</sup>                  |            | 40.00    | 18969.67 | 0.00      | 0.00     |
| 2849 | 275.28 | 306.19444 |        |                                                                                                                                                            |             | ION=[M+H] <sup>+</sup>                  |            | 19589.85 | 88116.00 | 6.00      | 71.00    |
| 2850 | 279.4  | 115.06266 | 4.059  | Proline                                                                                                                                                    | C5H9NO2     | ION=[M+H] <sup>+</sup>                  |            | 234.92   | 337.67   | 2267.17   | 21435.67 |

|      |        |            |        |                                                                                                        |              |                            |              |           |           |           |           |
|------|--------|------------|--------|--------------------------------------------------------------------------------------------------------|--------------|----------------------------|--------------|-----------|-----------|-----------|-----------|
| 2851 | 279.25 | 812.40734  |        |                                                                                                        |              | ION=[M+H] <sup>+</sup>     |              | 14.77     | 71.67     | 1918.00   | 14691.67  |
| 2852 | 278.19 | 292.14194  | 8.631  | Filaminast                                                                                             | C15H20N2O4   | ION=[M+H] <sup>+</sup>     | 141184-34-1  | 748.00    | 12702.33  | 599.17    | 407.67    |
| 2853 | 281.75 | 357.20064  |        |                                                                                                        |              | ION=[M+H] <sup>+</sup>     |              | 597.08    | 259.83    | 100.83    | 3595.00   |
| 2854 | 282.51 | 750.38568  |        |                                                                                                        |              | ION=[M+H+H] <sup>2+</sup>  |              | 527.23    | 2297.83   | 4040.33   | 907.00    |
| 2855 | 283.67 | 328.14301  | 19.59  | Dnc008536                                                                                              | C18H20N2O4   | ION=[M+H] <sup>+</sup>     |              | 5332.46   | 283.33    | 767.17    | 3895.67   |
| 2856 | 286.11 | 306.19398  |        |                                                                                                        |              | ION=[M+H] <sup>+</sup>     |              | 15335.23  | 378267.33 | 0.00      | 0.00      |
| 2857 | 290.89 | 341.23171  | 16.546 | Diprotin A                                                                                             | C17H31N3O4   | ION=[M+H] <sup>+</sup>     |              | 4307.69   | 286.50    | 1610.33   | 2464.67   |
| 2858 | 293.35 | 115.06267  | 9.835  | Proline                                                                                                | C5H9NO2      | ION=[M+H] <sup>+</sup>     |              | 337.69    | 174.17    | 1247.83   | 8493.67   |
| 2859 | 295.3  | 325.17387  |        |                                                                                                        |              | ION=[M+H] <sup>+</sup>     |              | 1170.62   | 4378.83   | 1480.83   | 689.33    |
| 2860 | 296.21 | 278.16301  | 7.759  | Santacruzamate A                                                                                       | C15H22N2O3   | ION=[M+H] <sup>+</sup>     |              | 14683.38  | 1590.67   | 5253.67   | 8379.33   |
| 2861 | 295.39 | 330.12964  | 17.874 | 4-(2-Hydroxyethyl)-2-methoxyphenyl beta-D-glucopyranoside                                              | C15H22O8     | ION=[M+H] <sup>+</sup>     |              | 877.69    | 3639.67   | 1493.00   | 602.67    |
| 2862 | 296.75 | 333.24201  |        |                                                                                                        |              | ION=[M+H] <sup>+</sup>     |              | 0.00      | 8129.83   | 0.00      | 0.00      |
| 2863 | 296    | 299.25744  |        |                                                                                                        |              | ION=[M+H] <sup>+</sup>     |              | 0.00      | 1939.00   | 0.00      | 0.00      |
| 2864 | 295.67 | 132.07827  | 3.29   | 2-Hydroxycaproic acid                                                                                  | C6H12O3      | ION=[M+H] <sup>+</sup>     |              | 1095.08   | 5953.83   | 2062.50   | 690.67    |
| 2865 | 299.54 | 246.13692  | 9.686  | 4-Acetoxy DMT                                                                                          | C14H18N2O2   | ION=[M+H] <sup>+</sup>     |              | 3000.31   | 2145.83   | 2825.67   | 1881.67   |
| 2866 | 301.29 | 328.14251  | 19.512 | Dnc008536                                                                                              | C18H20N2O4   | ION=[M+H] <sup>+</sup>     |              | 4666.15   | 474.83    | 1548.33   | 3496.67   |
| 2867 | 302.72 | 456.33097  |        |                                                                                                        |              | ION=[M+H] <sup>+</sup>     |              | 2932.15   | 0.00      | 0.00      | 0.00      |
| 2868 | 302.83 | 278.16282  | 8.35   | Santacruzamate A                                                                                       | C15H22N2O3   | ION=[M+H] <sup>+</sup>     |              | 16566.62  | 3514.00   | 4561.00   | 17959.33  |
| 2869 | 305.41 | 459.26883  |        |                                                                                                        |              | ION=[M+H] <sup>+</sup>     |              | 960.00    | 3339.33   | 349.00    | 171.67    |
| 2870 | 305.6  | 939.51225  |        |                                                                                                        |              | ION=[M+H+H] <sup>2+</sup>  |              | 18448.00  | 393.17    | 2690.33   | 1175.67   |
| 2871 | 311.33 | 308.14761  |        |                                                                                                        |              | ION=[M+Na] <sup>+</sup>    |              | 463.85    | 3420.83   | 415.50    | 940.00    |
| 2872 | 312.46 | 439.14134  |        |                                                                                                        |              | ION=[M-H2O+H] <sup>+</sup> |              | 922.15    | 7519.17   | 265.33    | 150.00    |
| 2873 | 311.18 | 132.0783   | 5.382  | 2-Hydroxycaproic acid                                                                                  | C6H12O3      | ION=[M+H] <sup>+</sup>     |              | 488.15    | 2730.83   | 264.00    | 739.67    |
| 2874 | 311.51 | 115.06263  | 3.749  | Proline                                                                                                | C5H9NO2      | ION=[M+H] <sup>+</sup>     |              | 100.15    | 320.67    | 1624.67   | 17769.00  |
| 2875 | 311.79 | 325.17392  | 7.065  | Cycloxydim                                                                                             | C17H27NO3S   | ION=[M+H] <sup>+</sup>     | 101205-02-1  | 575.38    | 3249.83   | 260.17    | 853.67    |
| 2876 | 311.02 | 443.29887  |        |                                                                                                        |              | ION=[M+H] <sup>+</sup>     |              | 71623.85  | 0.00      | 0.00      | 0.00      |
| 2877 | 313.99 | 333.24197  |        |                                                                                                        |              | ION=[M+H] <sup>+</sup>     |              | 0.00      | 10506.00  | 0.00      | 0.00      |
| 2878 | 314.78 | 278.16296  | 2.076  | Santacruzamate A                                                                                       | C15H22N2O3   | ION=[M+H] <sup>+</sup>     |              | 35347.38  | 7353.50   | 10617.83  | 25943.67  |
| 2879 | 315.25 | 301.2002   | 14.87  | Phormidinine B                                                                                         | C19H27NO2    | ION=[M+H] <sup>+</sup>     |              | 2777.54   | 782.50    | 1895.33   | 3079.33   |
| 2880 | 316.77 | 1432.71918 |        |                                                                                                        |              | ION=[M+H+H2] <sup>3+</sup> |              | 10.92     | 1921.67   | 21.83     | 0.00      |
| 2881 | 318.15 | 1144.56889 |        |                                                                                                        |              | ION=[M+H+H] <sup>2+</sup>  |              | 1706.15   | 1254.33   | 439.67    | 518.00    |
| 2882 | 318.87 | 278.16333  | 1.245  | Santacruzamate A                                                                                       | C15H22N2O3   | ION=[M+H] <sup>+</sup>     |              | 28574.15  | 1347.33   | 2641.83   | 5024.33   |
| 2883 | 319.5  | 485.35586  |        |                                                                                                        |              | ION=[M+H] <sup>+</sup>     |              | 2550.31   | 0.00      | 0.00      | 0.00      |
| 2884 | 320    | 456.33013  |        |                                                                                                        |              | ION=[M+H] <sup>+</sup>     |              | 2117.54   | 9.00      | 10.00     | 0.00      |
| 2885 | 323.06 | 939.50981  |        |                                                                                                        |              | ION=[M+H] <sup>+</sup>     |              | 20.00     | 0.00      | 725.67    | 5563.33   |
| 2886 | 321.98 | 387.24644  |        |                                                                                                        |              | ION=[M+H] <sup>+</sup>     |              | 3879.85   | 1381.00   | 651.17    | 5635.00   |
| 2887 | 322.96 | 115.0628   | 9.508  | Proline                                                                                                | C5H9NO2      | ION=[M+H] <sup>+</sup>     |              | 82.46     | 88.00     | 806.67    | 7823.00   |
| 2888 | 323.62 | 1385.73897 |        |                                                                                                        |              | ION=[M+H+H2] <sup>3+</sup> |              | 83.69     | 1891.00   | 113.17    | 51.33     |
| 2889 | 326.09 | 222.14686  | 11.671 | Tetraglyme                                                                                             | C10H22O5     | ION=[M+H] <sup>+</sup>     |              | 14080.92  | 20429.33  | 39305.83  | 18548.67  |
| 2890 | 326.07 | 240.16177  |        |                                                                                                        |              | ION=[M+H] <sup>+</sup>     |              | 1842.62   | 2747.83   | 6749.00   | 3400.33   |
| 2891 | 329.2  | 347.25749  |        |                                                                                                        |              | ION=[M+H] <sup>+</sup>     |              | 0.00      | 4325.00   | 10.17     | 0.00      |
| 2892 | 328.77 | 364.12664  |        |                                                                                                        |              | ION=[M+H] <sup>+</sup>     |              | 724.00    | 2765.33   | 607.33    | 70.00     |
| 2893 | 335.31 | 1385.73962 |        |                                                                                                        |              | ION=[M+H+H2] <sup>3+</sup> |              | 292.00    | 3119.17   | 237.67    | 77.67     |
| 2894 | 335.64 | 542.36592  |        |                                                                                                        |              | ION=[M+H] <sup>+</sup>     |              | 97524.31  | 0.00      | 0.00      | 253.33    |
| 2895 | 337.73 | 405.26246  | 13.493 | N2-(4-aminocyclohexyl)-n6-benzyl-9-cyclopentyl-9h-purine-2,6-diamine                                   | C23H31N7     | ION=[M+H] <sup>+</sup>     |              | 0.00      | 33623.17  | 15.83     | 50.33     |
| 2896 | 337.92 | 421.13124  |        |                                                                                                        |              | ION=[M+H] <sup>+</sup>     |              | 610.15    | 4834.67   | 199.83    | 250.67    |
| 2897 | 341.42 | 1432.72905 |        |                                                                                                        |              | ION=[M+H+H] <sup>2+</sup>  |              | 482.77    | 1145.50   | 292.17    | 345.00    |
| 2898 | 342.3  | 317.1745   |        |                                                                                                        |              | ION=[M+H] <sup>+</sup>     |              | 2922.62   | 542.50    | 933.33    | 4080.67   |
| 2899 | 345.9  | 1144.57325 |        |                                                                                                        |              | ION=[M+H+H] <sup>2+</sup>  |              | 570.62    | 2051.00   | 1455.67   | 651.00    |
| 2900 | 350.38 | 445.25375  |        |                                                                                                        |              | ION=[M+H] <sup>+</sup>     |              | 1053.38   | 184.17    | 69.17     | 1166.33   |
| 2901 | 352.3  | 670.25082  |        |                                                                                                        |              | ION=[M+H] <sup>+</sup>     |              | 38827.08  | 118595.17 | 130673.50 | 80561.33  |
| 2902 | 353.4  | 266.17283  | 13.246 | Pentaglyme                                                                                             | C12H26O6     | ION=[M+H] <sup>+</sup>     | 1191-87-3    | 2448.46   | 2733.83   | 4930.33   | 2787.00   |
| 2903 | 353.31 | 317.17459  |        |                                                                                                        |              | ION=[M+H] <sup>+</sup>     |              | 4458.00   | 894.67    | 1607.33   | 3934.67   |
| 2904 | 354.22 | 576.35347  |        |                                                                                                        |              | ION=[M+H] <sup>+</sup>     |              | 13626.31  | 0.00      | 0.00      | 0.00      |
| 2905 | 355.29 | 1634.86015 |        |                                                                                                        |              | ION=[M+H+H] <sup>2+</sup>  |              | 1192.77   | 65.50     | 153.00    | 48.33     |
| 2906 | 355.81 | 346.11659  |        |                                                                                                        |              | ION=[M+H] <sup>+</sup>     |              | 8619.85   | 30966.17  | 6580.00   | 717.33    |
| 2907 | 360.19 | 585.19663  |        |                                                                                                        |              | ION=[M+H] <sup>+</sup>     |              | 10671.54  | 4905.83   | 2485.67   | 7656.67   |
| 2908 | 362.01 | 185.95013  |        |                                                                                                        |              | ION=[M+H] <sup>+</sup>     |              | 3314.46   | 2198.83   | 2848.00   | 5647.33   |
| 2909 | 362.11 | 652.23953  |        |                                                                                                        |              | ION=[M+H] <sup>+</sup>     |              | 4518.00   | 6755.50   | 1835.17   | 424.33    |
| 2910 | 367.07 | 585.19637  | 15.733 | Cadazolid                                                                                              | C29H29F2N3O8 | ION=[M+H] <sup>+</sup>     | 1025097-10-2 | 540937.54 | 330848.33 | 204058.67 | 402183.33 |
| 2911 | 369.86 | 437.16278  |        |                                                                                                        |              | ION=[M+H] <sup>+</sup>     |              | 18.15     | 4396.17   | 0.00      | 0.00      |
| 2912 | 371.29 | 670.25143  |        |                                                                                                        |              | ION=[M+H] <sup>+</sup>     |              | 5784.15   | 4084.50   | 1332.17   | 2102.33   |
| 2913 | 371.92 | 157.95416  |        |                                                                                                        |              | ION=[M+H] <sup>+</sup>     |              | 9094.62   | 5379.17   | 5516.17   | 6549.67   |
| 2914 | 372.22 | 680.34081  |        |                                                                                                        |              | ION=[M+H] <sup>+</sup>     |              | 2252.00   | 13031.50  | 2502.33   | 621.33    |
| 2915 | 373.44 | 601.19184  |        |                                                                                                        |              | ION=[M+H] <sup>+</sup>     |              | 1646.92   | 684.83    | 8655.50   | 16871.00  |
| 2916 | 377.72 | 682.25106  |        |                                                                                                        |              | ION=[M+H] <sup>+</sup>     |              | 116072.77 | 58886.17  | 22552.17  | 43175.67  |
| 2917 | 380.64 | 501.27996  |        |                                                                                                        |              | ION=[M+H] <sup>+</sup>     |              | 3398.00   | 206.67    | 8386.00   | 3894.67   |
| 2918 | 380.88 | 437.16125  | 14.046 | 3-[3-(dimethyl-1,3-thiazol-5-yl)-4-oxo-2h,4h-indeno[1,2-c]pyrazol-5-yl]-1-(4-methylpiperazin-1-yl)urea | C21H23N7O2S  | ION=[M+H] <sup>+</sup>     |              | 14.00     | 9489.83   | 25.67     | 0.00      |
| 2919 | 381.06 | 346.11784  |        |                                                                                                        |              | ION=[M+H] <sup>+</sup>     |              | 1163.38   | 2810.83   | 698.00    | 866.33    |
| 2920 | 384.14 | 216.10182  | 9.86   | 4-Oxosebacic Acid                                                                                      | C10H16O5     | ION=[M+H] <sup>+</sup>     | 114212-45-2  | 1668.00   | 946.00    | 1022.50   | 3107.33   |

|      |        |            |        |                                                                       |             |                |            |            |           |            |            |
|------|--------|------------|--------|-----------------------------------------------------------------------|-------------|----------------|------------|------------|-----------|------------|------------|
| 2921 | 387.5  | 232.13243  | 14.356 | 1,5-Dimethyl-N-[(1-methylpyrrol-2-yl)methyl]pyrazole-3-carboxamide    | C12H16N4O   | ION=[M-H2O+H]+ |            | 1685.54    | 4255.00   | 5660.17    | 5339.67    |
| 2922 | 387.16 | 185.94976  |        |                                                                       |             | ION=[M+H]+     |            | 12460.92   | 5939.67   | 5356.33    | 8901.33    |
| 2923 | 387.73 | 435.14681  |        |                                                                       |             | ION=[M+H]+     |            | 109.54     | 5569.50   | 14.33      | 53.33      |
| 2924 | 388.98 | 157.95388  |        |                                                                       |             | ION=[M+H]+     |            | 6331.38    | 9675.17   | 7454.17    | 10577.00   |
| 2925 | 391    | 1400.73072 |        |                                                                       |             | ION=[M+H+H2]3+ |            | 0.00       | 9.33      | 52254.67   | 9.00       |
| 2926 | 389.77 | 1400.73883 |        |                                                                       |             | ION=[M+H+H]2+  |            | 192.31     | 27.17     | 6669.83    | 205.67     |
| 2927 | 391.12 | 601.19144  |        |                                                                       |             | ION=[M-H2O+H]+ |            | 4727.85    | 1869.50   | 888.50     | 4403.00    |
| 2928 | 391.34 | 160.11061  | 7.359  | 2-Butoxyethyl acetate                                                 | C8H16O3     | ION=[M+H]+     |            | 1330.15    | 2257.83   | 3234.00    | 6812.33    |
| 2929 | 393.46 | 196.11163  | 17.937 | (Z)-4-hydroxy-4-methyl-2-(1-hexenyl)-2-butenolide                     | C11H16O3    | ION=[M+H]+     |            | 1969.08    | 3572.67   | 2078.67    | 1522.33    |
| 2930 | 394.79 | 684.26516  |        |                                                                       |             | ION=[M+H]+     |            | 1323037.85 | 582287.33 | 1133030.17 | 1050993.33 |
| 2931 | 395.75 | 700.26272  |        |                                                                       |             | ION=[M+H]+     |            | 5018.62    | 2369.17   | 4479.17    | 4242.00    |
| 2932 | 395.63 | 256.09688  | 10.388 | Ethyl (3-cyano-1H-1,5-benzodiazepin-4-yl)carbamate                    | C13H12N4O2  | ION=[M+H]+     |            | 6121.54    | 6844.50   | 71.33      | 0.00       |
| 2933 | 395.16 | 435.14726  |        |                                                                       |             | ION=[M+H]+     |            | 0.00       | 2593.33   | 20.33      | 0.00       |
| 2934 | 395.63 | 182.09533  | 8.805  | Mephenesin                                                            | C10H14O3    | ION=[M+H]+     | 59-47-2    | 1187.38    | 3889.50   | 401.17     | 643.33     |
| 2935 | 404.7  | 407.20575  |        |                                                                       |             | ION=[M+H]+     |            | 6602.00    | 685.83    | 5760.67    | 3199.00    |
| 2936 | 405.27 | 272.17321  | 3.424  | Elaiomycin D                                                          | C13H24N2O4  | ION=[M+H]+     |            | 1237.38    | 274.67    | 52590.50   | 172.67     |
| 2937 | 409.32 | 274.1308   |        |                                                                       |             | ION=[M+H]+     |            | 2033.38    | 1568.67   | 1371.50    | 1299.67    |
| 2938 | 409.65 | 184.10914  | 7.027  | 3-(1-Hydroxy-2-methylbutyl)-4-methyl-2(5H)-furanone                   | C10H16O3    | ION=[M+H]+     |            | 4839.54    | 5357.50   | 4204.83    | 5084.67    |
| 2939 | 411.24 | 318.12219  |        |                                                                       |             | ION=[M+H]+     |            | 616.15     | 2514.50   | 515.83     | 607.00     |
| 2940 | 412.39 | 162.12616  | 6.083  | 4-(3-hydroxybutoxy)butan-2-ol                                         | C8H18O3     | ION=[M+H]+     |            | 4779.08    | 3882.67   | 2101.83    | 8126.33    |
| 2941 | 415.61 | 256.12285  | 12.448 | N-[4-(benzyloxy)phenyl]glycinamide                                    | C15H16N2O2  | ION=[M+H]+     |            | 2402.00    | 3903.00   | 3124.00    | 4227.33    |
| 2942 | 416.12 | 407.20564  |        |                                                                       |             | ION=[M+H]+     |            | 3662.00    | 243.67    | 3048.50    | 1599.00    |
| 2943 | 423.64 | 318.12294  | 13.103 | 2-(4-hydroxy-5-phenyl-1h-pyrazol-3-yl)-1h-benzimidazole-5-carboxamide | C17H14N6O   | ION=[M+H]+     |            | 285.54     | 3096.67   | 88.17      | 230.00     |
| 2944 | 427.47 | 157.95414  |        |                                                                       |             | ION=[M+H]+     |            | 3158.46    | 4180.50   | 9593.50    | 5780.33    |
| 2945 | 428.91 | 245.0849   | 8.735  | 5-Fluoro-2'-deoxycytidine                                             | C9H12FN3O4  | ION=[M+H]+     |            | 4192.92    | 1020.83   | 3774.50    | 5508.00    |
| 2946 | 432.15 | 175.96578  |        |                                                                       |             | ION=[M+H]+     |            | 6591.23    | 5972.33   | 5518.50    | 5156.67    |
| 2947 | 435.26 | 320.13841  |        |                                                                       |             | ION=[M-H2O+H]+ |            | 0.00       | 9598.50   | 0.00       | 0.00       |
| 2948 | 436.16 | 303.11741  | 9.602  | 8-[(2,5-dimethoxyphenyl)methyl]-2-fluoro-9h-purin-6-amine             | C14H14FN5O2 | ION=[M+H]+     |            | 689.69     | 21105.83  | 1010.67    | 464.33     |
| 2949 | 434.75 | 198.98312  |        |                                                                       |             | ION=[M+H]+     |            | 4737.69    | 4523.33   | 3237.00    | 3353.33    |
| 2950 | 435.54 | 622.26644  |        |                                                                       |             | ION=[M+H]+     |            | 0.00       | 13546.50  | 0.00       | 0.00       |
| 2951 | 437.48 | 245.08516  | 10.73  |                                                                       |             | ION=[M+H]+     |            | 5288.92    | 1078.83   | 4094.33    | 4995.33    |
| 2952 | 438    | 226.97806  |        |                                                                       |             | ION=[M+H]+     |            | 4633.85    | 3530.67   | 3186.50    | 3477.00    |
| 2953 | 438    | 198.98348  |        |                                                                       |             | ION=[M+H]+     |            | 7429.69    | 4498.83   | 4846.50    | 5171.00    |
| 2954 | 438.23 | 185.95009  |        |                                                                       |             | ION=[M+H]+     |            | 6531.54    | 12680.33  | 6843.50    | 8629.67    |
| 2955 | 440.03 | 1697.79535 |        |                                                                       |             | ION=[M+H+H]2+  |            | 1197.23    | 0.00      | 0.00       | 37.33      |
| 2956 | 442.71 | 203.96154  |        |                                                                       |             | ION=[M+H]+     |            | 5209.38    | 5057.17   | 4493.17    | 4012.00    |
| 2957 | 444.76 | 294.14692  |        |                                                                       |             | ION=[M+H]+     |            | 1761.38    | 1625.83   | 3739.50    | 2356.33    |
| 2958 | 444.91 | 198.98356  |        |                                                                       |             | ION=[M+H]+     |            | 10616.15   | 5341.33   | 5064.33    | 5314.67    |
| 2959 | 446.48 | 175.96535  |        |                                                                       |             | ION=[M+H]+     |            | 5900.00    | 6164.33   | 5421.83    | 5311.00    |
| 2960 | 444.93 | 226.97829  |        |                                                                       |             | ION=[M+H]+     |            | 5370.92    | 3673.50   | 3158.50    | 3474.67    |
| 2961 | 450.44 | 320.1381   | 7.382  | Z-ala-pro-oh                                                          | C16H20N2O5  | ION=[M+H]+     | 21027-01-0 | 1911.23    | 56984.33  | 2325.50    | 845.00     |
| 2962 | 450.53 | 640.27627  |        |                                                                       |             | ION=[M-H2O+H]+ |            | 40.15      | 14986.67  | 0.00       | 0.00       |
| 2963 | 450.68 | 303.11406  | 6.512  | 8-[(2,5-dimethoxyphenyl)methyl]-2-fluoro-9h-purin-6-amine             | C14H14FN5O2 | ION=[M+H]+     |            | 1134.00    | 33138.17  | 1442.50    | 738.33     |
| 2964 | 454.47 | 185.94993  |        |                                                                       |             | ION=[M+H]+     |            | 4550.00    | 5291.00   | 7259.00    | 5273.33    |
| 2965 | 453.05 | 157.95404  |        |                                                                       |             | ION=[M+H]+     |            | 3867.54    | 4231.00   | 4552.50    | 10189.67   |
| 2966 | 453.55 | 198.98428  |        |                                                                       |             | ION=[M+H]+     |            | 5610.92    | 5217.33   | 5047.67    | 5228.00    |
| 2967 | 456.65 | 253.94313  |        |                                                                       |             | ION=[M+H]+     |            | 4429.08    | 3848.67   | 3657.67    | 1230.33    |
| 2968 | 458.22 | 1697.79866 |        |                                                                       |             | ION=[M+H+H]2+  |            | 1053.69    | 30.17     | 0.00       | 103.00     |
| 2969 | 463.16 | 254.15231  | 11.897 | Tricholactone                                                         | C14H22O4    | ION=[M+H]+     |            | 396.62     | 3917.00   | 286.50     | 389.33     |
| 2970 | 464.88 | 175.96543  |        |                                                                       |             | ION=[M-H2O+H]+ |            | 4606.15    | 10619.33  | 5552.00    | 6450.00    |
| 2971 | 464.95 | 185.95003  |        |                                                                       |             | ION=[M+H]+     |            | 9015.23    | 9523.67   | 10372.17   | 5291.67    |
| 2972 | 470.31 | 320.1381   |        |                                                                       |             | ION=[M+H]+     |            | 155.85     | 5474.83   | 145.50     | 88.67      |
| 2973 | 473.18 | 198.98306  |        |                                                                       |             | ION=[M+H]+     |            | 6231.38    | 5499.33   | 5000.17    | 5635.00    |
| 2974 | 475.17 | 203.9617   |        |                                                                       |             | ION=[M+H]+     |            | 6250.15    | 5026.67   | 4465.67    | 4116.33    |
| 2975 | 478.13 | 253.94295  |        |                                                                       |             | ION=[M+H]+     |            | 3930.77    | 4032.83   | 3527.83    | 1273.67    |
| 2976 | 478    | 321.12802  |        |                                                                       |             | ION=[M+H]+     |            | 0.00       | 2179.83   | 11.17      | 0.00       |
| 2977 | 478.22 | 274.13174  |        |                                                                       |             | ION=[M+H]+     |            | 4961.85    | 1111.00   | 3066.33    | 1286.33    |
| 2978 | 480.52 | 320.13784  | 16.895 | Z-ala-pro-oh                                                          | C16H20N2O5  | ION=[M-H2O+H]+ | 21027-01-0 | 9248.77    | 20479.17  | 10470.50   | 6876.67    |
| 2979 | 479.88 | 705.28017  |        |                                                                       |             | ION=[M+H+H]2+  |            | 24.00      | 3576.83   | 8.67       | 0.00       |
| 2980 | 482.25 | 2650.21044 |        |                                                                       |             | ION=[M+H+H]2+  |            | 2315.08    | 123.33    | 0.00       | 0.00       |
| 2981 | 482.66 | 1398.50145 |        |                                                                       |             | ION=[M+H]+     |            | 28.46      | 1668.50   | 0.00       | 0.00       |
| 2982 | 482.64 | 2650.20478 |        |                                                                       |             | ION=[M+H+H2]3+ |            | 2655.23    | 190.17    | 0.00       | 0.00       |
| 2983 | 480.89 | 334.15339  | 5.523  | N-methoxyseptorinol                                                   | C17H22N2O5  | ION=[M+H]+     |            | 7188.77    | 16002.83  | 8182.50    | 5179.00    |
| 2984 | 481.64 | 185.95018  |        |                                                                       |             | ION=[M+H]+     |            | 5837.69    | 10969.50  | 6363.50    | 7380.33    |
| 2985 | 480.85 | 157.95399  |        |                                                                       |             | ION=[M+H]+     |            | 2956.15    | 7484.83   | 8717.50    | 2152.67    |
| 2986 | 483.1  | 198.98274  |        |                                                                       |             | ION=[M+H]+     |            | 6196.15    | 5280.33   | 4966.67    | 5493.33    |



|      |        |           |        |                                                                                                     |            |                            |            |          |          |          |          |
|------|--------|-----------|--------|-----------------------------------------------------------------------------------------------------|------------|----------------------------|------------|----------|----------|----------|----------|
| 2987 | 486.42 | 203.96128 |        |                                                                                                     |            | ION=[M+H] <sup>+</sup>     |            | 6368.77  | 5268.17  | 4601.00  | 4188.00  |
| 2988 | 487.36 | 934.24325 |        |                                                                                                     |            | ION=[M+H] <sup>+</sup>     |            | 330.15   | 985.17   | 3875.50  | 219.33   |
| 2989 | 489.86 | 175.9656  | 14.043 | Medronic Acid                                                                                       | CH6O6P2    | ION=[M+H] <sup>+</sup>     | 1984-15-2  | 7662.62  | 5416.83  | 5379.83  | 5902.33  |
| 2990 | 491.42 | 334.15348 | 3.295  | N-methoxyseptorinol                                                                                 | C17H22N2O5 | ION=[M+H] <sup>+</sup>     |            | 610.31   | 19050.50 | 704.33   | 242.67   |
| 2991 | 492.08 | 157.95408 |        |                                                                                                     |            | ION=[M+H] <sup>+</sup>     |            | 8244.31  | 8900.50  | 6823.67  | 9003.67  |
| 2992 | 494.99 | 705.27844 |        |                                                                                                     |            | ION=[M+H+H] <sup>2+</sup>  |            | 9.69     | 64785.83 | 21.17    | 0.00     |
| 2993 | 495.07 | 705.28605 |        |                                                                                                     |            | ION=[M+H] <sup>+</sup>     |            | 12.62    | 5378.33  | 0.00     | 47.00    |
| 2994 | 495.73 | 198.98296 |        |                                                                                                     |            | ION=[M+H] <sup>+</sup>     |            | 6462.00  | 5467.33  | 4986.67  | 5273.33  |
| 2995 | 497.43 | 934.24194 |        |                                                                                                     |            | ION=[M+H] <sup>+</sup>     |            | 279.38   | 946.00   | 3846.83  | 574.00   |
| 2996 | 500.35 | 203.96119 |        |                                                                                                     |            | ION=[M+H] <sup>+</sup>     |            | 6625.69  | 5062.00  | 4705.33  | 4134.33  |
| 2997 | 502.83 | 250.11937 | 15.843 | Coenzyme Q1                                                                                         | C14H18O4   | ION=[M+H] <sup>+</sup>     |            | 3840.92  | 1974.50  | 4926.83  | 1717.67  |
| 2998 | 503.91 | 226.15832 | 10.74  | (7E)-(-)-7-ethyl-9-hydroxy-7-undecene-3,6-dione                                                     | C13H22O3   | ION=[M+H] <sup>+</sup>     |            | 4277.85  | 218.00   | 0.00     | 215.67   |
| 2999 | 505.47 | 256.12171 |        |                                                                                                     |            | ION=[M+H] <sup>+</sup>     |            | 8309.38  | 2509.67  | 7216.50  | 3070.67  |
| 3000 | 506.4  | 185.95013 |        |                                                                                                     |            | ION=[M+H] <sup>+</sup>     |            | 7410.15  | 4685.00  | 3001.17  | 7321.33  |
| 3001 | 508.44 | 228.13803 |        |                                                                                                     |            | ION=[M+H] <sup>+</sup>     |            | 2691.23  | 945.33   | 2067.33  | 3207.67  |
| 3002 | 509.53 | 208.14759 | 5.954  | Nopyl acetate                                                                                       | C13H20O2   | ION=[M+H] <sup>+</sup>     |            | 35961.08 | 34576.33 | 1131.50  | 2474.67  |
| 3003 | 510.51 | 235.93244 |        |                                                                                                     |            | ION=[M+H] <sup>+</sup>     |            | 4267.23  | 4114.17  | 4022.67  | 763.00   |
| 3004 | 513.49 | 253.94279 |        |                                                                                                     |            | ION=[M+H] <sup>+</sup>     |            | 4110.92  | 4183.50  | 3021.33  | 1763.33  |
| 3005 | 514.67 | 157.9545  |        |                                                                                                     |            | ION=[M+H] <sup>+</sup>     |            | 8021.08  | 3268.83  | 6408.33  | 4389.33  |
| 3006 | 513.49 | 198.98286 |        |                                                                                                     |            | ION=[M+H] <sup>+</sup>     |            | 6478.77  | 5483.17  | 4645.17  | 5449.33  |
| 3007 | 514.28 | 316.14277 |        |                                                                                                     |            | ION=[M+H] <sup>+</sup>     |            | 11199.23 | 7320.50  | 16940.00 | 9784.00  |
| 3008 | 516.99 | 202.15841 | 6.313  | CK13b                                                                                               | C11H22O3   | ION=[M-H2O+H] <sup>+</sup> |            | 1545.38  | 4062.50  | 2242.83  | 3835.00  |
| 3009 | 516.6  | 276.14773 |        |                                                                                                     |            | ION=[M-H2O+H] <sup>+</sup> |            | 235.69   | 17942.83 | 0.00     | 0.00     |
| 3010 | 519.16 | 278.15237 | 13.778 | Dibutyl phthalate                                                                                   | C16H22O4   | ION=[M+H] <sup>+</sup>     |            | 2479.54  | 2829.33  | 683.67   | 1237.33  |
| 3011 | 519.66 | 185.95014 |        |                                                                                                     |            | ION=[M+H] <sup>+</sup>     |            | 7228.62  | 8677.67  | 9378.83  | 7640.33  |
| 3012 | 525.55 | 235.93229 |        |                                                                                                     |            | ION=[M+H] <sup>+</sup>     |            | 2580.31  | 3641.50  | 3493.50  | 1271.33  |
| 3013 | 525.62 | 184.14768 | 9.659  | 2-Propenoic acid, 2-ethylhexyl ester                                                                | C11H20O2   | ION=[M+H] <sup>+</sup>     |            | 2464.62  | 7208.33  | 3496.67  | 7935.33  |
| 3014 | 527.99 | 175.96577 |        |                                                                                                     |            | ION=[M+H] <sup>+</sup>     |            | 7297.85  | 5794.50  | 5351.50  | 5499.33  |
| 3015 | 528.48 | 216.04147 | 11.469 | Bergapten                                                                                           | C12H8O4    | ION=[M+H] <sup>+</sup>     | 484-20-8   | 8971.08  | 8929.17  | 7258.50  | 8852.67  |
| 3016 | 528.63 | 250.15746 | 11.044 | Gemfibrozil                                                                                         | C15H22O3   | ION=[M+H] <sup>+</sup>     | 25812-30-0 | 2815.38  | 2069.67  | 5172.83  | 3126.33  |
| 3017 | 529.83 | 198.98313 |        |                                                                                                     |            | ION=[M+H] <sup>+</sup>     |            | 6259.23  | 5371.50  | 4669.83  | 5230.33  |
| 3018 | 530.77 | 185.95016 |        |                                                                                                     |            | ION=[M+H] <sup>+</sup>     |            | 6107.38  | 4021.67  | 5607.33  | 3969.00  |
| 3019 | 531.92 | 253.94243 |        |                                                                                                     |            | ION=[M+H] <sup>+</sup>     |            | 4101.54  | 3615.83  | 3720.17  | 1367.00  |
| 3020 | 531.24 | 194.05987 | 4.063  | Dimethyl phthalate                                                                                  | C10H10O4   | ION=[M+H] <sup>+</sup>     |            | 8384.92  | 3936.83  | 4142.33  | 15641.00 |
| 3021 | 531.32 | 278.15183 |        |                                                                                                     |            | ION=[M+H] <sup>+</sup>     |            | 3196.31  | 3873.50  | 786.67   | 1135.00  |
| 3022 | 535.68 | 203.96167 |        |                                                                                                     |            | ION=[M+H] <sup>+</sup>     |            | 6480.15  | 5021.00  | 4379.50  | 4443.00  |
| 3023 | 536.13 | 157.95419 |        |                                                                                                     |            | ION=[M+H] <sup>+</sup>     |            | 6745.23  | 8594.17  | 5437.17  | 4549.33  |
| 3024 | 539.06 | 210.16318 | 7.154  | Altretamine                                                                                         | C9H18N6    | ION=[M+H] <sup>+</sup>     |            | 406.92   | 16761.50 | 85.50    | 199.67   |
| 3025 | 544.27 | 198.9831  |        |                                                                                                     |            | ION=[M+H] <sup>+</sup>     |            | 6327.54  | 5377.67  | 4694.50  | 5444.33  |
| 3026 | 542.86 | 185.95027 |        |                                                                                                     |            | ION=[M+H] <sup>+</sup>     |            | 2366.15  | 2744.83  | 1839.50  | 7878.00  |
| 3027 | 543.12 | 226.97723 |        |                                                                                                     |            | ION=[M+H] <sup>+</sup>     |            | 4396.31  | 3415.33  | 3142.00  | 3550.33  |
| 3028 | 544.48 | 175.96581 |        |                                                                                                     |            | ION=[M+H] <sup>+</sup>     |            | 7870.15  | 6154.67  | 5158.83  | 6149.00  |
| 3029 | 547.77 | 226.11978 | 16.841 | 1,4-Butanediol dimethacrylate                                                                       | C12H18O4   | ION=[M+H] <sup>+</sup>     | 2082-81-7  | 15247.38 | 17456.00 | 15334.33 | 23799.00 |
| 3030 | 549.6  | 157.95427 |        |                                                                                                     |            | ION=[M+H] <sup>+</sup>     |            | 9906.15  | 3467.67  | 8472.00  | 11259.33 |
| 3031 | 550.3  | 204.1378  | 8.036  | (3R,5R)-3,5-dihydroxydecanoic acid                                                                  | C10H20O4   | ION=[M+H] <sup>+</sup>     |            | 19075.23 | 15000.33 | 9875.67  | 36338.33 |
| 3032 | 550.4  | 280.16774 | 11.405 | 1,13-dihydroxy-6-methyl-1h,4h,6h,7h,8h,9h,11ah,12h,13h,14h,14ah-cyclopenta[f]oxacyclotridecan-4-one | C16H24O4   | ION=[M+H] <sup>+</sup>     | 20350-15-6 | 7398.46  | 5374.00  | 265.67   | 572.00   |
| 3033 | 553.42 | 198.98309 |        |                                                                                                     |            | ION=[M+H] <sup>+</sup>     |            | 5648.15  | 4900.50  | 4447.17  | 5380.33  |
| 3034 | 552.6  | 185.9502  |        |                                                                                                     |            | ION=[M+H] <sup>+</sup>     |            | 8404.77  | 9168.83  | 11423.50 | 7353.67  |
| 3035 | 557.77 | 206.13519 |        |                                                                                                     |            | ION=[M+H] <sup>+</sup>     |            | 2162.77  | 1743.83  | 1508.00  | 5412.33  |
| 3036 | 558.62 | 235.93215 |        |                                                                                                     |            | ION=[M+H] <sup>+</sup>     |            | 4549.08  | 4504.17  | 4013.67  | 1681.00  |
| 3037 | 559.95 | 226.97758 |        |                                                                                                     |            | ION=[M+H] <sup>+</sup>     |            | 4352.46  | 3510.33  | 3108.50  | 3541.67  |
| 3038 | 562.76 | 157.95393 |        |                                                                                                     |            | ION=[M+H] <sup>+</sup>     |            | 8805.23  | 6970.00  | 5514.00  | 8731.67  |
| 3039 | 566.07 | 206.13261 | 9.124  | Ibuprofen                                                                                           | C13H18O2   | ION=[M+H] <sup>+</sup>     |            | 10323.85 | 4227.83  | 9423.50  | 19441.00 |
| 3040 | 566.37 | 292.20395 | 15.025 | Mueggelone                                                                                          | C18H28O3   | ION=[M+H] <sup>+</sup>     |            | 4342.46  | 2112.17  | 1999.17  | 3749.67  |
| 3041 | 567.09 | 186.12141 |        |                                                                                                     |            | ION=[M+H] <sup>+</sup>     |            | 2318.00  | 4393.00  | 2894.50  | 4919.67  |
| 3042 | 568.89 | 502.27858 |        |                                                                                                     |            | ION=[M-H2O+H] <sup>+</sup> |            | 3037.38  | 3356.00  | 3327.67  | 2565.33  |
| 3043 | 570.35 | 185.95002 |        |                                                                                                     |            | ION=[M+H] <sup>+</sup>     |            | 7632.77  | 8393.67  | 9149.00  | 7417.67  |
| 3044 | 570.56 | 290.1885  | 15.337 | Octinoxate   Octyl 4-methoxycinnamate                                                               | C18H26O3   | ION=[M+H] <sup>+</sup>     |            | 3995.69  | 1917.00  | 1439.00  | 3443.00  |
| 3045 | 571.03 | 274.19351 | 13.258 | Empenthrin                                                                                          | C18H26O2   | ION=[M+H] <sup>+</sup>     | 54406-48-3 | 2640.46  | 1378.17  | 1299.67  | 2406.33  |
| 3046 | 574.53 | 175.96534 |        |                                                                                                     |            | ION=[M-H2O+H] <sup>+</sup> |            | 4064.92  | 5930.33  | 4971.83  | 4482.67  |
| 3047 | 572.45 | 235.93239 |        |                                                                                                     |            | ION=[M+H] <sup>+</sup>     |            | 3265.08  | 4379.00  | 3554.33  | 1342.00  |
| 3048 | 573.11 | 198.98197 |        |                                                                                                     |            | ION=[M+H] <sup>+</sup>     |            | 6556.15  | 5273.33  | 4755.67  | 5541.33  |
| 3049 | 573.83 | 203.96142 |        |                                                                                                     |            | ION=[M+H] <sup>+</sup>     |            | 6461.69  | 4749.50  | 4318.17  | 4336.67  |
| 3050 | 572.6  | 234.16312 | NA     | 2,10,10-trimethyltricyclo[6.3.0.0π,?]undec-6-ene-6-carboxylic acid                                  | C15H22O2   | ION=[M+H] <sup>+</sup>     |            | 2724.62  | 1484.33  | 1251.33  | 2349.00  |
| 3051 | 575.27 | 260.10172 | 13.853 | (9aR,9bS)-9a-Hydroxy-6,9-dimethyl-3-methylene-3,3a,4,5,9a,9b-hexahydroazuleno[4,5-b]furan-2,7-dione | C15H16O4   | ION=[M+H] <sup>+</sup>     |            | 2609.69  | 2314.50  | 2308.50  | 3498.67  |
| 3052 | 577.02 | 197.98004 |        |                                                                                                     |            | ION=[M+H] <sup>+</sup>     |            | 496.77   | 55.67    | 52.33    | 35.33    |



|      |        |            |        |                                                                                                     |            |                            |            |           |          |           |           |
|------|--------|------------|--------|-----------------------------------------------------------------------------------------------------|------------|----------------------------|------------|-----------|----------|-----------|-----------|
| 3053 | 577.1  | 262.15678  |        |                                                                                                     |            |                            |            | 2849.85   | 1335.17  | 1241.67   | 3283.33   |
| 3054 | 578.15 | 280.16827  | 17.003 | 1,13-dihydroxy-6-methyl-1h,4h,6h,7h,8h,9h,11ah,12h,13h,14h,14ah-cyclopenta[f]oxacyclotridecan-4-one | C16H24O4   | ION=[M+H] <sup>+</sup>     | 20350-15-6 | 7251.08   | 6413.67  | 407.17    | 1137.67   |
| 3055 | 579.08 | 222.16261  |        |                                                                                                     |            | ION=[M+H] <sup>+</sup>     |            | 120.31    | 2716.17  | 0.00      | 0.00      |
| 3056 | 580.28 | 220.1092   | 9.611  | Benzoic acid, 2-hydroxy-, cyclohexyl ester                                                          | C13H16O3   | ION=[M-H2O+H] <sup>+</sup> |            | 22235.08  | 14832.50 | 18003.83  | 5973.67   |
| 3057 | 579.4  | 1250.73829 |        |                                                                                                     |            | ION=[M+H+H] <sup>2+</sup>  |            | 0.00      | 3059.83  | 3171.00   | 978.00    |
| 3058 | 579.45 | 272.17757  |        |                                                                                                     |            | ION=[M+H] <sup>+</sup>     |            | 2226.15   | 1423.83  | 5328.50   | 2954.00   |
| 3059 | 580.99 | 185.95003  |        |                                                                                                     |            | ION=[M+H] <sup>+</sup>     |            | 8218.62   | 2879.17  | 3877.33   | 3856.33   |
| 3060 | 581.74 | 180.11585  | 3.751  | 3-tert-Butyl-4-hydroxyanisole                                                                       | C11H16O2   | ION=[M+H] <sup>+</sup>     |            | 112312.31 | 69606.17 | 35251.50  | 60124.33  |
| 3061 | 582.88 | 360.22986  | 7.69   | Iloprost                                                                                            | C22H32O4   | ION=[M+H] <sup>+</sup>     |            | 6225.08   | 2722.00  | 290.83    | 1298.67   |
| 3062 | 584.73 | 235.93265  |        |                                                                                                     |            | ION=[M+H] <sup>+</sup>     |            | 4236.15   | 4323.17  | 3952.50   | 1758.33   |
| 3063 | 585.53 | 1222.71178 |        |                                                                                                     |            | ION=[M+H+H] <sup>2+</sup>  |            | 27.54     | 1915.33  | 6333.67   | 2584.67   |
| 3065 | 587.59 | 883.34866  |        |                                                                                                     |            | ION=[M+H+H] <sup>2+</sup>  |            | 2860.77   | 960.83   | 221.33    | 940.00    |
| 3066 | 590.63 | 243.18463  | 9.38   | Cyclohexyl-norstatine                                                                               | C13H25NO3  | ION=[M-H2O+H] <sup>+</sup> |            | 3561.08   | 3809.33  | 2964.00   | 4239.67   |
| 3067 | 590.78 | 737.5114   | 19.95  | (-)-Ternatin                                                                                        | C37H67N7O8 | ION=[M+H] <sup>+</sup>     |            | 107.08    | 0.00     | 0.00      | 12544.33  |
| 3068 | 591.48 | 262.15735  |        |                                                                                                     |            | ION=[M+H] <sup>+</sup>     |            | 4482.92   | 2643.33  | 503.67    | 425.33    |
| 3069 | 596.95 | 185.95084  |        |                                                                                                     |            | ION=[M+H] <sup>+</sup>     |            | 2407.38   | 1252.83  | 5184.83   | 3203.67   |
| 3070 | 597.65 | 238.15785  | 11.695 | Saccharomonopyrone B                                                                                | C14H22O3   | ION=[M+H] <sup>+</sup>     |            | 590.77    | 88375.83 | 42.17     | 93.67     |
| 3071 | 598.53 | 1206.71506 |        |                                                                                                     |            | ION=[M+H+H] <sup>2+</sup>  |            | 29.85     | 2073.67  | 5483.50   | 3661.67   |
| 3072 | 599.67 | 222.16263  |        |                                                                                                     |            | ION=[M+H] <sup>+</sup>     |            | 93.69     | 3242.17  | 31.00     | 0.00      |
| 3073 | 601.4  | 175.9652   |        |                                                                                                     |            | ION=[M-H2O+H] <sup>+</sup> |            | 6944.46   | 4823.50  | 8536.17   | 10681.33  |
| 3074 | 600.47 | 253.94297  |        |                                                                                                     |            | ION=[M-H2O+H] <sup>+</sup> |            | 3841.85   | 4616.50  | 4280.67   | 1910.67   |
| 3075 | 600.48 | 198.98262  |        |                                                                                                     |            | ION=[M+H] <sup>+</sup>     |            | 6672.46   | 5089.83  | 4887.00   | 5569.67   |
| 3076 | 600.9  | 252.17259  | 19.823 | Illicic acid                                                                                        | C15H24O3   | ION=[M+H] <sup>+</sup>     | 4586-68-9  | 3229.85   | 1507.17  | 99.33     | 107.67    |
| 3077 | 605.94 | 1222.71161 |        |                                                                                                     |            | ION=[M+H+H] <sup>2+</sup>  |            | 31.85     | 3637.50  | 4298.50   | 28439.33  |
| 3078 | 604.35 | 1222.72769 |        |                                                                                                     |            | ION=[M+H] <sup>+</sup>     |            | 0.00      | 169.83   | 409.33    | 3071.00   |
| 3079 | 605.22 | 1275.62068 |        |                                                                                                     |            | ION=[M+H+H] <sup>2+</sup>  |            | 0.00      | 69.67    | 154.67    | 2824.00   |
| 3080 | 604.76 | 203.96089  |        |                                                                                                     |            | ION=[M-H2O+H] <sup>+</sup> |            | 9273.54   | 10777.00 | 9037.33   | 7221.00   |
| 3081 | 607.5  | 262.15733  | 4.669  | 7-hydroxy-10-methoxydehydrodihydrobotrydial                                                         | C16H22O3   | ION=[M+H] <sup>+</sup>     |            | 1188.77   | 31725.83 | 312.17    | 843.67    |
| 3082 | 607.28 | 883.35055  |        |                                                                                                     |            | ION=[M+H+H] <sup>2+</sup>  |            | 4451.23   | 1575.33  | 545.50    | 1538.00   |
| 3083 | 608.18 | 253.94283  |        |                                                                                                     |            | ION=[M+H] <sup>+</sup>     |            | 5571.23   | 4677.67  | 3980.33   | 1847.33   |
| 3084 | 607.92 | 175.9657   |        |                                                                                                     |            | ION=[M+H] <sup>+</sup>     |            | 7987.08   | 5765.67  | 4839.67   | 5508.67   |
| 3085 | 609.66 | 326.20959  |        |                                                                                                     |            | ION=[M-H2O+H] <sup>+</sup> |            | 7728.62   | 4101.00  | 3656.67   | 9255.33   |
| 3086 | 611.52 | 1236.72486 |        |                                                                                                     |            | ION=[M+H+H] <sup>2+</sup>  |            | 0.00      | 1684.17  | 2121.00   | 8501.33   |
| 3087 | 609.69 | 1220.6938  |        |                                                                                                     |            | ION=[M+H+H] <sup>2+</sup>  |            | 27.69     | 677.67   | 500.17    | 17467.00  |
| 3088 | 617.29 | 1234.70961 |        |                                                                                                     |            | ION=[M+H+H] <sup>2+</sup>  |            | 0.00      | 635.83   | 752.67    | 7528.67   |
| 3089 | 617.43 | 198.98264  |        |                                                                                                     |            | ION=[M+H] <sup>+</sup>     |            | 6380.62   | 5243.00  | 4711.17   | 4915.67   |
| 3090 | 620.7  | 290.18845  | 14.406 | Octinoxate   Octyl 4-methoxycinnamate                                                               | C18H26O3   | ION=[M+H] <sup>+</sup>     |            | 9907.69   | 7434.83  | 21701.00  | 14482.00  |
| 3091 | 619.99 | 737.51122  |        |                                                                                                     |            | ION=[M+H] <sup>+</sup>     |            | 0.00      | 0.00     | 0.00      | 7688.00   |
| 3092 | 623    | 232.14752  |        |                                                                                                     |            | ION=[M+H] <sup>+</sup>     |            | 2318.31   | 1120.17  | 2099.00   | 5247.00   |
| 3093 | 623.29 | 1275.62528 |        |                                                                                                     |            | ION=[M+H+H] <sup>2+</sup>  |            | 17.69     | 6286.50  | 2186.00   | 6325.67   |
| 3094 | 623.96 | 1206.71292 |        |                                                                                                     |            | ION=[M+H+H] <sup>2+</sup>  |            | 15.38     | 3569.83  | 3144.33   | 13815.67  |
| 3095 | 623    | 181.9769   |        |                                                                                                     |            | ION=[M+H] <sup>+</sup>     |            | 1300.00   | 805.00   | 490.83    | 368.00    |
| 3096 | 628.31 | 235.93246  |        |                                                                                                     |            | ION=[M+H] <sup>+</sup>     |            | 3923.85   | 3702.67  | 4046.67   | 1235.67   |
| 3097 | 625.71 | 253.94291  |        |                                                                                                     |            | ION=[M+H] <sup>+</sup>     |            | 5279.85   | 4257.83  | 3812.00   | 1699.67   |
| 3098 | 626.81 | 185.95025  |        |                                                                                                     |            | ION=[M+H] <sup>+</sup>     |            | 2734.77   | 4649.33  | 7405.33   | 0.00      |
| 3099 | 627.89 | 175.96593  |        |                                                                                                     |            | ION=[M+H] <sup>+</sup>     |            | 7496.92   | 5609.33  | 4598.33   | 3479.33   |
| 3100 | 627.44 | 1222.72575 |        |                                                                                                     |            | ION=[M+H] <sup>+</sup>     |            | 0.00      | 3329.00  | 1288.83   | 3780.33   |
| 3101 | 626.47 | 1222.71154 |        |                                                                                                     |            | ION=[M+H+H] <sup>2+</sup>  |            | 75.23     | 20244.67 | 7195.50   | 26377.33  |
| 3102 | 626.53 | 262.15762  | 13.777 | 7-hydroxy-10-methoxydehydrodihydrobotrydial                                                         | C16H22O3   | ION=[M+H] <sup>+</sup>     |            | 515.38    | 2891.83  | 220.33    | 194.00    |
| 3103 | 629.33 | 248.14205  | 10.351 | Parthenium                                                                                          | C15H20O3   | ION=[M-H2O+H] <sup>+</sup> |            | 160.46    | 3763.00  | 111.50    | 145.00    |
| 3104 | 628.2  | 1220.73517 |        |                                                                                                     |            | ION=[M+H] <sup>+</sup>     |            | 0.00      | 720.33   | 321.83    | 3240.67   |
| 3105 | 629.14 | 1220.71053 |        |                                                                                                     |            | ION=[M+H+H] <sup>2+</sup>  |            | 0.00      | 7360.33  | 4018.00   | 29021.33  |
| 3106 | 628.63 | 1218.72293 |        |                                                                                                     |            | ION=[M+H+H] <sup>2+</sup>  |            | 16.31     | 831.00   | 1367.83   | 2942.33   |
| 3107 | 629.54 | 335.21     | 5.239  | Bulbiferate A                                                                                       | C19H29NO4  | ION=[M-H2O+H] <sup>+</sup> |            | 5000.77   | 1113.83  | 922.33    | 2245.00   |
| 3108 | 631.18 | 512.29867  | 20.488 | Muscovite A                                                                                         | C28H40N4O5 | ION=[M+H] <sup>+</sup>     |            | 10471.08  | 6831.33  | 12583.17  | 13303.33  |
| 3109 | 633.11 | 1220.71154 |        |                                                                                                     |            | ION=[M+H] <sup>+</sup>     |            | 0.00      | 2198.83  | 161.00    | 2503.67   |
| 3110 | 632.66 | 552.29245  |        |                                                                                                     |            | ION=[M+H] <sup>+</sup>     |            | 2010.31   | 2159.83  | 3086.17   | 1617.67   |
| 3111 | 634.05 | 1236.72541 |        |                                                                                                     |            | ION=[M+H+H] <sup>2+</sup>  |            | 24.31     | 54588.83 | 174988.17 | 507935.33 |
| 3112 | 634.46 | 1220.6949  |        |                                                                                                     |            | ION=[M+H+H] <sup>2+</sup>  |            | 26.15     | 10131.33 | 1524.50   | 23898.00  |
| 3113 | 634.49 | 252.17278  | 12.973 | Illicic acid                                                                                        | C15H24O3   | ION=[M+H] <sup>+</sup>     | 4586-68-9  | 289.23    | 3932.17  | 31.50     | 95.67     |
| 3115 | 636.27 | 324.2293   |        |                                                                                                     |            | ION=[M+H] <sup>+</sup>     |            | 6020.92   | 2335.50  | 6362.50   | 10292.33  |
| 3116 | 636.59 | 1234.70672 |        |                                                                                                     |            | ION=[M+H+H] <sup>2+</sup>  |            | 26.15     | 50468.00 | 80315.33  | 690134.33 |
| 3117 | 639.53 | 292.20387  | 13.683 | Mueggelone                                                                                          | C18H28O3   | ION=[M-H2O+H] <sup>+</sup> |            | 31915.23  | 13125.17 | 10422.67  | 18389.33  |
| 3118 | 640.02 | 332.19646  | 9.743  | Kalkipyron A                                                                                        | C20H28O4   | ION=[M+H] <sup>+</sup>     |            | 4152.92   | 2966.33  | 1600.00   | 488.33    |
| 3119 | 639.55 | 234.1629   | 12.383 | 2,10,10-trimethyltricyclo[6.3.0.0π,?]undec-6-ene-6-carboxylic acid                                  | C15H22O2   | ION=[M+H] <sup>+</sup>     |            | 19015.08  | 6951.50  | 5825.00   | 11063.33  |
| 3120 | 639.47 | 364.22263  | 28.036 | Yoshinone A                                                                                         | C21H32O5   | ION=[M+H] <sup>+</sup>     |            | 2678.92   | 1867.17  | 2271.33   | 690.00    |
| 3121 | 640.32 | 1167.97955 |        |                                                                                                     |            | ION=[M+H] <sup>+</sup>     |            | 4854.31   | 2748.00  | 13548.17  | 10394.00  |

|      |        |            |        |                                                                             |            |  |                            |            |          |          |          |          |
|------|--------|------------|--------|-----------------------------------------------------------------------------|------------|--|----------------------------|------------|----------|----------|----------|----------|
| 3122 | 641.12 | 1250.7539  |        |                                                                             |            |  | ION=[M+H] <sup>+</sup>     |            | 0.00     | 2233.83  | 14198.83 | 27757.33 |
| 3123 | 641.99 | 232.14726  | 8.691  | Mebutamate                                                                  | C10H20N2O4 |  | ION=[M+H] <sup>+</sup>     |            | 3570.31  | 1594.33  | 2756.33  | 2427.67  |
| 3125 | 643.95 | 3500.93674 |        |                                                                             |            |  | ION=[M+H+H2] <sup>3+</sup> |            | 11037.38 | 11995.50 | 29168.33 | 10989.00 |
| 3126 | 644.83 | 198.98272  |        |                                                                             |            |  | ION=[M+H] <sup>+</sup>     |            | 6122.62  | 4181.17  | 4040.00  | 2323.33  |
| 3127 | 645.64 | 1250.59985 |        |                                                                             |            |  | ION=[M+H+H] <sup>2+</sup>  |            | 0.00     | 1097.33  | 0.00     | 0.00     |
| 3128 | 649.32 | 318.22019  |        |                                                                             |            |  | ION=[M-H2O+H] <sup>+</sup> |            | 0.00     | 0.00     | 4142.17  | 0.00     |
| 3129 | 650.15 | 336.23079  | 19.372 | Debromogrenadadien                                                          | C20H32O4   |  | ION=[M+H] <sup>+</sup>     |            | 0.00     | 0.00     | 3116.67  | 0.00     |
| 3130 | 649.6  | 376.22276  |        |                                                                             |            |  | ION=[M+H] <sup>+</sup>     |            | 0.00     | 0.00     | 2161.67  | 0.00     |
| 3131 | 652.15 | 3500.94096 |        |                                                                             |            |  | ION=[M+H+H2] <sup>3+</sup> |            | 6018.77  | 33.83    | 132.33   | 183.67   |
| 3132 | 650.69 | 248.14256  | 12.259 | Parthenium                                                                  | C15H20O3   |  | ION=[M+H] <sup>+</sup>     |            | 2978.77  | 3871.67  | 1779.50  | 4125.33  |
| 3133 | 651.29 | 1218.71856 |        |                                                                             |            |  | ION=[M+H+H] <sup>2+</sup>  |            | 0.00     | 1506.67  | 716.17   | 14949.00 |
| 3134 | 651.34 | 175.96575  |        |                                                                             |            |  | ION=[M+H] <sup>+</sup>     |            | 6576.15  | 4411.33  | 4298.00  | 4097.33  |
| 3135 | 652.77 | 1167.97733 |        |                                                                             |            |  | ION=[M+H] <sup>+</sup>     |            | 1877.38  | 4349.00  | 4616.17  | 210.33   |
| 3136 | 653.46 | 262.15779  | 17.633 | 7-hydroxy-10-methoxydehydrodihydrobotrydial                                 | C16H22O3   |  | ION=[M+H] <sup>+</sup>     |            | 629.08   | 4304.67  | 361.50   | 332.67   |
| 3137 | 655.23 | 1218.71879 |        |                                                                             |            |  | ION=[M+H+H] <sup>2+</sup>  |            | 0.00     | 9200.33  | 1413.83  | 14315.67 |
| 3138 | 656.72 | 1320.45339 |        |                                                                             |            |  | ION=[M+H] <sup>+</sup>     |            | 6853.69  | 5487.17  | 30330.50 | 15714.67 |
| 3139 | 655.85 | 1320.20271 |        |                                                                             |            |  | ION=[M+H] <sup>+</sup>     |            | 6886.31  | 5599.50  | 25954.67 | 19172.00 |
| 3140 | 657.25 | 308.19915  | 14.517 | Sacrolide A                                                                 | C18H28O4   |  | ION=[M-H2O+H] <sup>+</sup> |            | 29901.54 | 13643.17 | 11548.83 | 22300.33 |
| 3141 | 658.38 | 308.19932  | 14.766 | Sacrolide A                                                                 | C18H28O4   |  | ION=[M+H] <sup>+</sup>     |            | 9002.31  | 9122.83  | 3379.00  | 8469.00  |
| 3142 | 659.84 | 1232.74155 |        |                                                                             |            |  | ION=[M+H] <sup>+</sup>     |            | 0.00     | 2045.33  | 3492.33  | 77231.33 |
| 3143 | 659.13 | 1260.70141 |        |                                                                             |            |  | ION=[M+H] <sup>+</sup>     |            | 0.00     | 60.50    | 13.83    | 7013.00  |
| 3145 | 663.98 | 238.15771  | 16.122 | Saccharomonopyrone B                                                        | C14H22O3   |  | ION=[M-H2O+H] <sup>+</sup> |            | 3733.85  | 2191.33  | 1291.00  | 3665.33  |
| 3146 | 662.26 | 1250.59402 |        |                                                                             |            |  | ION=[M+H+H] <sup>2+</sup>  |            | 11.85    | 2778.17  | 3231.17  | 0.00     |
| 3147 | 667.31 | 1320.20282 |        |                                                                             |            |  | ION=[M+H] <sup>+</sup>     |            | 1244.46  | 1331.00  | 3702.33  | 730.33   |
| 3148 | 665.77 | 1320.45149 |        |                                                                             |            |  | ION=[M+H] <sup>+</sup>     |            | 2158.77  | 1822.33  | 3360.33  | 4600.33  |
| 3149 | 666.92 | 1118.34788 |        |                                                                             |            |  | ION=[M+H] <sup>+</sup>     |            | 2650.92  | 1891.33  | 8121.33  | 7009.67  |
| 3150 | 667.02 | 1118.09757 |        |                                                                             |            |  | ION=[M+H] <sup>+</sup>     |            | 2961.23  | 1569.33  | 8662.33  | 8336.67  |
| 3151 | 667.36 | 234.19927  | 12.23  | Ethanone, 1-(1,2,3,4,5,6,7,8-octahydro-2,3,8,8-tetramethyl-2-naphthalenyl)- | C16H26O    |  | ION=[M+H] <sup>+</sup>     |            | 2055.85  | 724.17   | 1704.67  | 3965.33  |
| 3152 | 666.92 | 1117.84675 |        |                                                                             |            |  | ION=[M+H] <sup>+</sup>     |            | 717.54   | 0.00     | 2947.00  | 1847.33  |
| 3154 | 667.4  | 2235.69275 |        |                                                                             |            |  | ION=[M+H+H] <sup>2+</sup>  |            | 1592.15  | 1311.17  | 4151.33  | 5103.67  |
| 3155 | 670.25 | 222.16287  |        |                                                                             |            |  | ION=[M+H] <sup>+</sup>     |            | 811.08   | 4660.67  | 162.00   | 167.00   |
| 3156 | 676.19 | 157.95435  |        |                                                                             |            |  | ION=[M+H] <sup>+</sup>     |            | 5770.46  | 2657.50  | 5898.33  | 10214.33 |
| 3157 | 678.28 | 308.1991   | 14.418 | Sacrolide A                                                                 | C18H28O4   |  | ION=[M-H2O+H] <sup>+</sup> |            | 5597.08  | 5235.67  | 2196.83  | 5838.67  |
| 3158 | 678.29 | 468.27253  | 13.55  | Carolacton                                                                  | C25H40O8   |  | ION=[M+H] <sup>+</sup>     |            | 2428.62  | 1596.50  | 4870.67  | 3937.33  |
| 3159 | 680.03 | 248.17799  | 16.598 | 13-hydroxy-marasm-7(8)-en-5-methoxy C $\geq$ -acetal                        | C16H24O2   |  | ION=[M+H] <sup>+</sup>     |            | 3321.38  | 6039.83  | 1209.17  | 2251.67  |
| 3160 | 680.31 | 306.18318  |        |                                                                             |            |  | ION=[M+H] <sup>+</sup>     |            | 5645.08  | 1834.50  | 1418.00  | 5902.00  |
| 3161 | 680.62 | 1117.84574 |        |                                                                             |            |  | ION=[M+H] <sup>+</sup>     |            | 0.00     | 0.00     | 1130.17  | 0.00     |
| 3162 | 680.36 | 2235.69033 |        |                                                                             |            |  | ION=[M+H+H] <sup>2+</sup>  |            | 724.62   | 1181.17  | 2500.00  | 394.33   |
| 3163 | 680.05 | 1118.34856 |        |                                                                             |            |  | ION=[M+H] <sup>+</sup>     |            | 801.23   | 816.67   | 4293.67  | 739.33   |
| 3164 | 681.22 | 1118.09793 |        |                                                                             |            |  | ION=[M+H] <sup>+</sup>     |            | 974.62   | 1175.17  | 4557.33  | 541.67   |
| 3165 | 681.03 | 676.36852  | 11.719 | Granadaene                                                                  | C39H52N2O8 |  | ION=[M+H] <sup>+</sup>     |            | 1368.00  | 164.50   | 1621.17  | 3354.33  |
| 3166 | 684.58 | 1210.66706 |        |                                                                             |            |  | ION=[M+H+H] <sup>2+</sup>  |            | 12.92    | 3981.00  | 9729.50  | 0.00     |
| 3168 | 683.59 | 1248.61183 |        |                                                                             |            |  | ION=[M+H+H] <sup>2+</sup>  |            | 0.00     | 1574.00  | 2019.83  | 0.00     |
| 3169 | 684.91 | 1250.59802 |        |                                                                             |            |  | ION=[M+H+H] <sup>2+</sup>  |            | 0.00     | 6220.17  | 2419.17  | 0.00     |
| 3170 | 684.44 | 302.24479  | 15.553 | Takinolide seco-acid                                                        | C17H34O4   |  | ION=[M+H] <sup>+</sup>     |            | 1660.00  | 327.83   | 696.33   | 2060.00  |
| 3171 | 685.42 | 508.26503  |        |                                                                             |            |  | ION=[M+H] <sup>+</sup>     |            | 1898.00  | 1244.67  | 4006.00  | 4832.33  |
| 3172 | 686.75 | 216.17368  |        |                                                                             |            |  | ION=[M+H] <sup>+</sup>     |            | 1863.08  | 1213.50  | 1052.17  | 2893.00  |
| 3173 | 688.12 | 324.22974  | 5.551  | TOFA                                                                        | C19H32O4   |  | ION=[M+H] <sup>+</sup>     |            | 13285.08 | 5094.00  | 17379.33 | 33284.67 |
| 3174 | 687.79 | 232.1832   |        |                                                                             |            |  | ION=[M+H] <sup>+</sup>     |            | 2803.85  | 1088.50  | 3738.83  | 6870.67  |
| 3175 | 687.73 | 486.2829   |        |                                                                             |            |  | ION=[M+H] <sup>+</sup>     |            | 2471.69  | 1038.50  | 3214.67  | 5622.00  |
| 3176 | 686.4  | 128.11974  | 3.649  | Sulcatol                                                                    | C8H16O     |  | ION=[M+H] <sup>+</sup>     |            | 2916.77  | 1910.50  | 1645.00  | 4268.00  |
| 3177 | 692.59 | 676.36953  |        |                                                                             |            |  | ION=[M+H] <sup>+</sup>     |            | 3950.00  | 340.83   | 3670.00  | 9974.67  |
| 3178 | 690.46 | 238.15707  | 9.557  | Saccharomonopyrone B                                                        | C14H22O3   |  | ION=[M+H] <sup>+</sup>     |            | 6885.08  | 10433.67 | 2564.67  | 3376.00  |
| 3179 | 690.72 | 1260.62527 |        |                                                                             |            |  | ION=[M+H+H] <sup>2+</sup>  |            | 0.00     | 2333.67  | 8276.17  | 0.00     |
| 3182 | 693.89 | 1248.65691 |        |                                                                             |            |  | ION=[M+H] <sup>+</sup>     |            | 24.15    | 262.33   | 3879.33  | 0.00     |
| 3183 | 700.52 | 1268.64258 |        |                                                                             |            |  | ION=[M+H] <sup>+</sup>     |            | 0.00     | 14.67    | 1985.83  | 0.00     |
| 3184 | 702.15 | 216.17364  | 10.093 | 12-Hydroxydodecanoic acid                                                   | C12H24O3   |  | ION=[M-H2O+H] <sup>+</sup> |            | 4459.23  | 3122.33  | 2415.67  | 7749.33  |
| 3185 | 702.31 | 110.10896  | 3.264  | Cyclooctene                                                                 | C8H14      |  | ION=[M+H] <sup>+</sup>     |            | 2402.62  | 1747.17  | 1167.33  | 4252.00  |
| 3186 | 704.31 | 272.17761  | 15.173 | Galaxolidone                                                                | C18H24O2   |  | ION=[M+H] <sup>+</sup>     |            | 4886.62  | 1259.67  | 4025.83  | 14786.67 |
| 3187 | 706.17 | 1210.66748 |        |                                                                             |            |  | ION=[M+H+H] <sup>2+</sup>  |            | 20.31    | 13470.00 | 4191.67  | 0.00     |
| 3188 | 706.67 | 652.36693  |        |                                                                             |            |  | ION=[M+H] <sup>+</sup>     |            | 3662.46  | 1226.17  | 2097.67  | 8407.00  |
| 3189 | 707.31 | 292.20371  | 18.458 | Mueggelone                                                                  | C18H28O3   |  | ION=[M+H] <sup>+</sup>     |            | 7256.31  | 4204.17  | 3535.17  | 8572.33  |
| 3190 | 706.93 | 1248.6151  |        |                                                                             |            |  | ION=[M+H+H] <sup>2+</sup>  |            | 16.00    | 3160.17  | 720.67   | 0.00     |
| 3191 | 710.42 | 310.21455  | 16.442 | 15.16-dihydrosacrolide A                                                    | C18H30O4   |  | ION=[M+Na] <sup>+</sup>    |            | 8803.08  | 6704.83  | 5869.17  | 5504.33  |
| 3192 | 708.94 | 266.189    | 9.961  | Tetranor-12(S)-HETE                                                         | C16H26O3   |  | ION=[M-H2O+H] <sup>+</sup> |            | 18784.92 | 9726.67  | 7323.33  | 15528.00 |
| 3193 | 711.09 | 306.21736  | 17.871 | Oxandrolone   Anavar                                                        | C19H30O3   |  | ION=[M+H] <sup>+</sup>     | 53-39-4    | 5143.38  | 1994.67  | 3149.67  | 3560.00  |
| 3194 | 710.9  | 346.21196  | 19.633 | 21-Deoxycortisol                                                            | C21H30O4   |  | ION=[M+H] <sup>+</sup>     |            | 2175.54  | 1071.00  | 1348.67  | 732.33   |
| 3195 | 709.36 | 274.19302  | 14.593 | Empenthrin                                                                  | C18H26O2   |  | ION=[M+H] <sup>+</sup>     | 54406-48-3 | 8510.46  | 4546.33  | 5300.33  | 9597.67  |
| 3196 | 709.16 | 1260.63182 |        |                                                                             |            |  | ION=[M+H+H] <sup>2+</sup>  |            | 43.08    | 1377.50  | 5053.50  | 0.00     |
| 3197 | 710.68 | 270.13742  | 15.227 | N-phenyl-N-piperidin-4-ylfuran-2-carboxamide                                | C16H18N2O2 |  | ION=[M+H] <sup>+</sup>     |            | 1821.69  | 817.33   | 610.83   | 1052.00  |
| 3198 | 715.28 | 250.19312  | 12.711 | 1,4-Benzenediol, 2,5-bis(1,1-dimethylpropyl)-                               | C16H26O2   |  | ION=[M+H] <sup>+</sup>     |            | 1327.38  | 1576.50  | 418.33   | 1068.67  |

|      |        |            |        |                                                                             |            |                            |             |          |          |           |           |
|------|--------|------------|--------|-----------------------------------------------------------------------------|------------|----------------------------|-------------|----------|----------|-----------|-----------|
| 3199 | 716.72 | 326.24574  | 16.091 | Avocadyne 1-acetate                                                         | C19H34O4   | ION=[M+H] <sup>+</sup>     | 24607-06-5  | 3255.54  | 1701.17  | 4658.67   | 6025.67   |
| 3200 | 717.04 | 1246.66078 |        |                                                                             |            | ION=[M+H+H] <sup>2+</sup>  |             | 0.00     | 2888.50  | 7424.67   | 0.00      |
| 3201 | 718.01 | 470.28822  |        |                                                                             |            | ION=[M+H] <sup>+</sup>     |             | 3717.23  | 2176.17  | 5804.33   | 6831.67   |
| 3202 | 719.33 | 272.17751  | 13.346 | Galaxolidone                                                                | C18H24O2   | ION=[M+H] <sup>+</sup>     |             | 26174.46 | 8168.50  | 22214.67  | 58194.33  |
| 3203 | 720.37 | 1192.71259 |        |                                                                             |            | ION=[M+H] <sup>+</sup>     |             | 5.23     | 194.17   | 4386.67   | 0.00      |
| 3204 | 724.98 | 326.24457  | 7.074  | Avocadyne 1-acetate                                                         | C19H34O4   | ION=[M+H] <sup>+</sup>     | 24607-06-5  | 15632.62 | 7618.00  | 16716.50  | 41259.67  |
| 3205 | 725.45 | 234.19908  | 11.772 | Ethanone, 1-(1,2,3,4,5,6,7,8-octahydro-2,3,8,8-tetramethyl-2-naphthalenyl)- | C16H26O    | ION=[M+H] <sup>+</sup>     |             | 9409.54  | 4137.83  | 9884.00   | 24710.67  |
| 3206 | 725.6  | 488.29917  | 13.996 | WSS2221                                                                     | C26H40N4O5 | ION=[M+H] <sup>+</sup>     |             | 3631.54  | 1628.67  | 3786.83   | 8869.33   |
| 3207 | 723.23 | 510.28084  | 12.566 | Virescoside Z13                                                             | C27H42O9   | ION=[M+H] <sup>+</sup>     |             | 3049.23  | 2229.67  | 6028.33   | 7506.33   |
| 3208 | 726.4  | 505.32537  | 19.499 | AAL Toxin Tb1                                                               | C25H47NO9  | ION=[M+H] <sup>+</sup>     |             | 10566.00 | 6946.83  | 9394.33   | 16929.00  |
| 3209 | 728.11 | 322.21449  | 15.97  | Decylubiquinone                                                             | C19H30O4   | ION=[M-H2O+H] <sup>+</sup> | 55486-00-5  | 8453.23  | 2485.17  | 3424.83   | 5123.00   |
| 3210 | 728.43 | 322.21408  | 18.218 | Decylubiquinone                                                             | C19H30O4   | ION=[M+H] <sup>+</sup>     | 55486-00-5  | 4710.62  | 1300.50  | 2050.17   | 3484.67   |
| 3211 | 729.36 | 1260.63635 |        |                                                                             |            | ION=[M+H+H] <sup>2+</sup>  |             | 0.00     | 724.50   | 4245.00   | 0.00      |
| 3212 | 735.01 | 264.17294  |        |                                                                             |            | ION=[M+H] <sup>+</sup>     |             | 4587.54  | 6570.50  | 551.50    | 2135.67   |
| 3213 | 735.47 | 312.22946  | 18.554 | Punaiaui acid                                                               | C18H32O4   | ION=[M-H2O+H] <sup>+</sup> |             | 5073.69  | 1860.67  | 2835.00   | 5353.67   |
| 3214 | 736.36 | 523.3385   |        |                                                                             |            | ION=[M+H] <sup>+</sup>     |             | 5736.46  | 5605.00  | 4252.67   | 7077.33   |
| 3215 | 741.54 | 654.38465  |        |                                                                             |            | ION=[M+H] <sup>+</sup>     |             | 2503.23  | 1587.83  | 4297.17   | 5868.33   |
| 3216 | 740.81 | 330.27594  |        |                                                                             |            | ION=[M+H] <sup>+</sup>     |             | 1683.85  | 1060.83  | 2695.00   | 4660.00   |
| 3217 | 745.53 | 676.36642  |        |                                                                             |            | ION=[M+H] <sup>+</sup>     |             | 640.31   | 1236.50  | 2029.00   | 1130.33   |
| 3218 | 746.19 | 334.21254  | 31.397 | Kalkipyron B                                                                | C20H30O4   | ION=[M+H] <sup>+</sup>     |             | 3960.31  | 2060.83  | 1748.17   | 2412.67   |
| 3219 | 745.61 | 710.29937  |        |                                                                             |            | ION=[M+H+H] <sup>2+</sup>  |             | 0.00     | 340.17   | 981.17    | 0.00      |
| 3220 | 744.93 | 290.18793  | 17.698 | Octinoxate   Octyl 4-methoxycinnamate                                       | C18H26O3   | ION=[M+H] <sup>+</sup>     |             | 3928.31  | 2119.17  | 1783.50   | 3734.67   |
| 3221 | 746.8  | 250.19338  | 14.992 | 1,4-Benzenediol, 2,5-bis(1,1-dimethylpropyl)-                               | C16H26O2   | ION=[M+H] <sup>+</sup>     |             | 6176.77  | 3179.33  | 1831.83   | 5415.67   |
| 3222 | 745.53 | 492.32868  | 32.888 | (2S)-1-O-Palmitoyl-3-O-?-D-galactopyranosylglycerol                         | C25H48O9   | ION=[M+H] <sup>+</sup>     |             | 1342.00  | 906.17   | 2432.50   | 3357.67   |
| 3223 | 746.44 | 496.3044   | 9.157  | Malacosterone                                                               | C27H44O8   | ION=[M+H] <sup>+</sup>     |             | 4887.38  | 948.00   | 8307.17   | 9770.00   |
| 3224 | 748.47 | 302.24539  | 14.53  | Takinolide seco-acid                                                        | C17H34O4   | ION=[M+H] <sup>+</sup>     |             | 5416.15  | 2272.50  | 2901.33   | 9888.67   |
| 3225 | 747.39 | 747.49522  |        |                                                                             |            | ION=[M+H] <sup>+</sup>     |             | 22.15    | 18.17    | 0.00      | 3465.33   |
| 3226 | 747.43 | 911.34211  |        |                                                                             |            | ION=[M+H+H] <sup>2+</sup>  |             | 1864.46  | 323.83   | 40.33     | 225.00    |
| 3227 | 750.28 | 320.19884  | 17.715 | Agglomerin D                                                                | C19H28O4   | ION=[M+H] <sup>+</sup>     |             | 3990.00  | 1108.67  | 1620.67   | 2358.00   |
| 3228 | 749.69 | 851.32612  |        |                                                                             |            | ION=[M+H+H] <sup>2+</sup>  |             | 2998.92  | 402.33   | 397.33    | 1348.67   |
| 3229 | 752.12 | 352.2609   | 4.709  | 1-[4-(2,4,4-trimethylpentan-2-yl)phenyl]-1,4,7,10-tetraoxaundecane          | C21H36O4   | ION=[M+H] <sup>+</sup>     |             | 37046.31 | 6135.67  | 54709.17  | 86755.67  |
| 3230 | 752.09 | 514.31419  | 12.189 | Microsporin B                                                               | C28H42N4O5 | ION=[M+H] <sup>+</sup>     |             | 6156.15  | 1127.67  | 9706.83   | 15718.33  |
| 3231 | 753.18 | 294.21954  | 6.669  | 9-Oxo-10(E),12(E)-octadecadienoic acid                                      | C18H30O3   | ION=[M-H2O+H] <sup>+</sup> |             | 11876.62 | 21099.00 | 7127.33   | 12745.67  |
| 3232 | 756.46 | 266.16562  | 2.151  | Phosphoric acid tributyl ester                                              | C12H27O4P  | ION=[M+H] <sup>+</sup>     |             | 41343.38 | 46866.50 | 35655.00  | 54955.67  |
| 3233 | 755.47 | 330.27602  | 4.642  | 1-Palmitoylglycerol                                                         | C19H38O4   | ION=[M+H] <sup>+</sup>     |             | 16264.00 | 2016.33  | 12145.67  | 41787.00  |
| 3234 | 754.87 | 654.38443  | 9.485  | Kribelloside C                                                              | C31H58O14  | ION=[M+H] <sup>+</sup>     |             | 6284.77  | 836.33   | 4616.33   | 16239.67  |
| 3235 | 756.4  | 266.18522  | 16.819 | Tetranor-12(S)-HETE                                                         | C16H26O3   | ION=[M+H] <sup>+</sup>     |             | 1831.54  | 689.33   | 59.67     | 0.00      |
| 3236 | 755.53 | 492.32902  | 9.102  | (2S)-1-O-Palmitoyl-3-O-?-D-galactopyranosylglycerol                         | C25H48O9   | ION=[M+H] <sup>+</sup>     |             | 6076.15  | 718.17   | 4475.33   | 15157.33  |
| 3237 | 754.74 | 710.29682  |        |                                                                             |            | ION=[M+H+H] <sup>2+</sup>  |             | 3125.69  | 755.67   | 2690.33   | 5676.67   |
| 3238 | 757.91 | 330.18205  |        |                                                                             |            | ION=[M+H] <sup>+</sup>     |             | 2093.38  | 1210.83  | 1179.33   | 1631.33   |
| 3239 | 761.37 | 851.32594  |        |                                                                             |            | ION=[M+H+H] <sup>2+</sup>  |             | 2936.15  | 393.17   | 1957.33   | 0.00      |
| 3240 | 761.48 | 911.34259  |        |                                                                             |            | ION=[M+H+H] <sup>2+</sup>  |             | 1951.23  | 241.00   | 30.17     | 77.67     |
| 3241 | 763.77 | 472.30342  | 18.577 | Cordyglycoside A                                                            | C25H44O8   | ION=[M+H] <sup>+</sup>     |             | 4784.92  | 2313.67  | 8554.50   | 14227.33  |
| 3242 | 764.47 | 316.20174  |        |                                                                             |            | ION=[M+H] <sup>+</sup>     |             | 2130.62  | 1451.00  | 1408.17   | 1050.67   |
| 3243 | 765.91 | 276.20839  |        |                                                                             |            | ION=[M+H] <sup>+</sup>     |             | 13779.38 | 7276.17  | 6454.50   | 13739.33  |
| 3244 | 770.09 | 342.21946  | 8.234  | Trimegestone                                                                | C22H30O3   | ION=[M+H] <sup>+</sup>     | 74513-62-5  | 4607.23  | 2695.50  | 11660.83  | 11442.00  |
| 3245 | 768.56 | 266.18246  | 11.504 | Desipramine                                                                 | C18H22N2   | ION=[M+H] <sup>+</sup>     |             | 2790.15  | 393.17   | 478.50    | 3874.00   |
| 3246 | 771.06 | 328.26042  | 17.221 | Valsafungin B                                                               | C19H36O4   | ION=[M+H] <sup>+</sup>     |             | 39809.69 | 13975.17 | 40230.50  | 129607.33 |
| 3247 | 770.71 | 490.31402  | 19.655 | Sapacitabine                                                                | C26H42N4O5 | ION=[M+Na] <sup>+</sup>    | 151823-14-2 | 4594.77  | 2568.17  | 8695.17   | 12253.67  |
| 3248 | 771.35 | 236.21491  | 4.136  | 8-Cyclohexadecen-1-one                                                      | C16H28O    | ION=[M+H] <sup>+</sup>     |             | 6444.92  | 2389.00  | 5845.00   | 23389.67  |
| 3249 | 771.44 | 254.2277   | 14.87  | (E)-11-Tetradecen-1-ol acetate                                              | C16H30O2   | ION=[M+H] <sup>+</sup>     | 33189-72-9  | 1248.00  | 583.17   | 1489.00   | 4237.67   |
| 3250 | 771.89 | 707.50562  |        |                                                                             |            | ION=[M+H] <sup>+</sup>     |             | 399.23   | 0.00     | 0.00      | 481.33    |
| 3251 | 770.37 | 707.53555  | 21.488 | Triterpene                                                                  | C41H73NO8  | ION=[M+H] <sup>+</sup>     |             | 9530.62  | 83954.50 | 181057.83 | 20118.67  |
| 3252 | 770.73 | 479.30107  |        |                                                                             |            | ION=[M+H] <sup>+</sup>     |             | 393.69   | 117.83   | 406.00    | 3723.67   |
| 3253 | 774.73 | 292.20343  | 24.19  | Mueggelone                                                                  | C18H28O3   | ION=[M+H] <sup>+</sup>     |             | 4484.46  | 2309.33  | 1889.33   | 4285.00   |
| 3254 | 774.82 | 266.15131  | 14.072 | Verrucarol                                                                  | C15H22O4   | ION=[M+H] <sup>+</sup>     |             | 5098.62  | 5897.17  | 6294.33   | 3696.33   |
| 3255 | 776.52 | 244.16803  | 10.891 | (-)-ethyl homononactate                                                     | C13H24O4   | ION=[M+H] <sup>+</sup>     |             | 4464.00  | 4643.50  | 4403.33   | 7055.00   |
| 3256 | 777.88 | 252.20921  | 16.167 | Wortmannine F                                                               | C16H28O2   | ION=[M+H] <sup>+</sup>     |             | 540.77   | 2160.50  | 343.00    | 566.67    |
| 3257 | 777.92 | 586.45995  |        |                                                                             |            | ION=[M+H] <sup>+</sup>     |             | 2109.23  | 970.67   | 3078.33   | 3156.00   |
| 3258 | 779.25 | 707.53625  | 24.336 | Triterpene                                                                  | C41H73NO8  | ION=[M+H] <sup>+</sup>     |             | 77210.62 | 252.67   | 516.50    | 0.00      |
| 3259 | 780.95 | 302.18561  | 19.053 | Formestane                                                                  | C19H26O3   | ION=[M+H] <sup>+</sup>     | 566-48-3    | 2444.77  | 1640.67  | 1716.83   | 753.33    |
| 3260 | 779.93 | 262.19356  | 15.693 | PI-200                                                                      | C17H26O2   | ION=[M+H] <sup>+</sup>     |             | 7586.15  | 3687.00  | 6827.00   | 4909.67   |
| 3261 | 782.07 | 346.21206  | 15.976 | Pantothenyl-aminoethanol-11-pivalic acid                                    | C16H30N2O6 | ION=[M+H] <sup>+</sup>     |             | 13969.38 | 6836.00  | 7936.00   | 5546.00   |
| 3262 | 783.54 | 324.22983  | 18.504 | TOFA                                                                        | C19H32O4   | ION=[M+H] <sup>+</sup>     |             | 5460.62  | 1688.67  | 2334.50   | 6005.00   |
| 3263 | 784.9  | 294.2193   | 3.826  | 9-Oxo-10(E),12(E)-octadecadienoic acid                                      | C18H30O3   | ION=[M-H2O+H] <sup>+</sup> |             | 79063.69 | 41682.33 | 38164.67  | 86073.33  |
| 3264 | 785.02 | 470.32352  | 16.622 | Gephyronic acid                                                             | C26H46O7   | ION=[M+Na] <sup>+</sup>    |             | 2815.54  | 2428.83  | 2034.83   | 2859.67   |
| 3265 | 786.04 | 298.19336  | 11.382 | Norethisterone                                                              | C20H26O2   | ION=[M+H] <sup>+</sup>     | 68-22-4     | 3982.15  | 1419.67  | 4820.00   | 8690.67   |
| 3266 | 785.74 | 268.20358  | 6.424  | Brd-a41145729-001-02-7                                                      | C16H28O3   | ION=[M+H] <sup>+</sup>     | 207597-75-9 | 2811.08  | 14030.00 | 1336.17   | 2427.33   |
| 3267 | 785.51 | 222.19927  | 14.343 | Alpha-bisabolol                                                             | C15H26O    | ION=[M+H] <sup>+</sup>     |             | 137.54   | 1801.67  | 67.67     | 68.33     |



|      |        |            |        |                                                                                       |             |                            |            |          |          |          |           |
|------|--------|------------|--------|---------------------------------------------------------------------------------------|-------------|----------------------------|------------|----------|----------|----------|-----------|
| 3268 | 786.4  | 498.31967  |        |                                                                                       |             | ION=[M+H] <sup>+</sup>     |            | 1549.38  | 461.50   | 3906.83  | 4100.67   |
| 3269 | 788.35 | 479.30099  |        |                                                                                       |             | ION=[M+H] <sup>+</sup>     |            | 2564.00  | 528.17   | 4521.00  | 4307.00   |
| 3270 | 789.92 | 332.19593  | 47.27  | Kalkipyron A                                                                          | C20H28O4    | ION=[M+H] <sup>+</sup>     |            | 3275.69  | 1695.50  | 2076.17  | 2413.33   |
| 3271 | 792.34 | 354.27655  |        |                                                                                       |             | ION=[M+H] <sup>+</sup>     |            | 9067.08  | 2515.33  | 20444.33 | 31599.33  |
| 3272 | 792.2  | 516.32973  | 19.17  | IC202C                                                                                | C23H44N6O7  | ION=[M+H] <sup>+</sup>     |            | 2826.77  | 599.83   | 5051.50  | 7273.67   |
| 3273 | 790.41 | 382.27202  | 14.801 | Misoprostol                                                                           | C22H38O5    | ION=[M+Na] <sup>+</sup>    | 59122-46-2 | 3399.69  | 2700.00  | 1973.17  | 6219.00   |
| 3274 | 794.01 | 360.22618  |        |                                                                                       |             | ION=[M+H] <sup>+</sup>     |            | 2090.62  | 1510.33  | 1448.67  | 3634.67   |
| 3275 | 794.43 | 314.18607  | 19.596 | Estradiol                                                                             | C20H26O3    | ION=[M+H] <sup>+</sup>     | 4245-41-4  | 9738.92  | 7354.00  | 6333.00  | 7219.00   |
| 3276 | 795.51 | 292.20381  | 13.483 | Mueggelone                                                                            | C18H28O3    | ION=[M+H] <sup>+</sup>     |            | 18699.38 | 10036.83 | 9033.17  | 27026.00  |
| 3277 | 796.97 | 586.46038  |        |                                                                                       |             | ION=[M+H] <sup>+</sup>     |            | 1747.85  | 543.00   | 1655.00  | 1779.33   |
| 3278 | 803.17 | 342.14707  | 5.958  | Dipropyleneglycol dibenzoate                                                          | C20H22O5    | ION=[M+Na] <sup>+</sup>    |            | 16457.85 | 18137.00 | 18410.67 | 33413.67  |
| 3279 | 804.08 | 792.50208  |        |                                                                                       |             | ION=[M+H+H] <sup>2+</sup>  |            | 800.15   | 278.17   | 1790.83  | 0.00      |
| 3280 | 809.57 | 730.32468  |        |                                                                                       |             | ION=[M+H] <sup>+</sup>     |            | 3934.31  | 2196.00  | 39.50    | 650.00    |
| 3281 | 810.09 | 523.33721  |        |                                                                                       |             | ION=[M+H] <sup>+</sup>     |            | 1959.23  | 0.00     | 4397.17  | 0.00      |
| 3282 | 812.15 | 300.13387  | 3.24   | (1S,3R,4S)-1-(4'-hydroxy-phenyl)-3,4-dihydro-3,4,5-trimethyl-1H-2-benzopyran-6,8-diol | C18H20O4    | ION=[M+H] <sup>+</sup>     |            | 19473.69 | 20244.00 | 21097.33 | 12944.67  |
| 3283 | 812.96 | 278.15182  | 13.313 | Dibutyl phthalate                                                                     | C16H22O4    | ION=[M+H] <sup>+</sup>     |            | 24094.15 | 19634.67 | 21852.33 | 53943.00  |
| 3284 | 817.65 | 474.31918  |        |                                                                                       |             | ION=[M+H] <sup>+</sup>     |            | 8404.31  | 4279.83  | 21875.17 | 26782.33  |
| 3285 | 818.12 | 330.2769   | 2.519  | 1-Palmitoylglycerol                                                                   | C19H38O4    | ION=[M+H] <sup>+</sup>     |            | 11477.69 | 4828.50  | 18016.00 | 34958.33  |
| 3286 | 821.11 | 296.23441  | 9.275  | 7-methoxy-9-methylhexadecadienoic acid                                                | C18H32O3    | ION=[M-H2O+H] <sup>+</sup> |            | 25946.77 | 11191.83 | 13144.33 | 24162.33  |
| 3287 | 819.58 | 492.32923  | 4.49   | (2S)-1-O-Palmitoyl-3-O-?-D-galactopyranosylglycerol                                   | C25H48O9    | ION=[M+Na] <sup>+</sup>    |            | 1854.31  | 1200.17  | 6259.33  | 5673.33   |
| 3288 | 819.6  | 270.21956  | 1.232  | Malyngolide                                                                           | C16H30O3    | ION=[M+H] <sup>+</sup>     |            | 964.77   | 3575.33  | 1218.00  | 2122.67   |
| 3289 | 821.16 | 393.18269  |        |                                                                                       |             | ION=[M+H] <sup>+</sup>     |            | 2335.38  | 1621.33  | 1441.00  | 1369.00   |
| 3290 | 820.44 | 566.25613  |        |                                                                                       |             | ION=[M+H+H] <sup>2+</sup>  |            | 1990.46  | 2096.83  | 3727.00  | 3795.00   |
| 3291 | 819.68 | 1040.57515 |        |                                                                                       |             | ION=[M+H+H] <sup>2+</sup>  |            | 647.23   | 94.50    | 1111.00  | 1817.67   |
| 3292 | 819.23 | 312.26645  | 15.794 | Ricinoleic acid methyl ester                                                          | C19H36O3    | ION=[M+H] <sup>+</sup>     |            | 4747.54  | 2583.17  | 5739.67  | 11645.67  |
| 3293 | 820.96 | 436.36714  |        |                                                                                       |             | ION=[M+H] <sup>+</sup>     |            | 1056.92  | 2765.83  | 445.83   | 1865.33   |
| 3294 | 819.68 | 589.27236  |        |                                                                                       |             | ION=[M+H+H] <sup>2+</sup>  |            | 1110.77  | 1022.67  | 1686.83  | 2415.33   |
| 3295 | 821.1  | 523.33603  |        |                                                                                       |             | ION=[M+H] <sup>+</sup>     |            | 19528.31 | 21938.67 | 20178.33 | 24894.33  |
| 3296 | 823.76 | 290.22425  |        |                                                                                       |             | ION=[M+H] <sup>+</sup>     |            | 4873.85  | 7318.33  | 4634.50  | 4503.00   |
| 3297 | 824.83 | 280.20436  |        |                                                                                       |             | ION=[M+H] <sup>+</sup>     |            | 3828.77  | 1131.83  | 1596.50  | 1952.00   |
| 3298 | 824.99 | 302.18601  | 16.616 | Formestane                                                                            | C19H26O3    | ION=[M+H] <sup>+</sup>     | 566-48-3   | 3737.08  | 1260.83  | 1321.50  | 767.67    |
| 3299 | 827.06 | 589.27185  |        |                                                                                       |             | ION=[M+H+H] <sup>2+</sup>  |            | 2978.92  | 1863.17  | 6221.17  | 5763.00   |
| 3300 | 826.35 | 514.31197  |        |                                                                                       |             | ION=[M+H] <sup>+</sup>     |            | 6552.15  | 4477.50  | 17830.50 | 16903.00  |
| 3301 | 827.67 | 566.25537  |        |                                                                                       |             | ION=[M+H+H] <sup>2+</sup>  |            | 3172.46  | 1381.50  | 6766.00  | 5814.67   |
| 3302 | 827.31 | 330.27662  | 9.296  | 1-Palmitoylglycerol                                                                   | C19H38O4    | ION=[M+H] <sup>+</sup>     |            | 53626.46 | 12763.00 | 70909.33 | 175997.00 |
| 3303 | 827.71 | 492.32957  | 6.297  | (2S)-1-O-Palmitoyl-3-O-?-D-galactopyranosylglycerol                                   | C25H48O9    | ION=[M-H2O+H] <sup>+</sup> |            | 5746.62  | 1077.50  | 7700.83  | 28698.67  |
| 3304 | 827.63 | 388.1051   |        |                                                                                       |             | ION=[M+H] <sup>+</sup>     |            | 7750.77  | 8853.17  | 2556.83  | 8485.33   |
| 3305 | 828.43 | 324.21149  |        |                                                                                       |             | ION=[M+H] <sup>+</sup>     |            | 2413.69  | 446.50   | 2518.33  | 7316.33   |
| 3306 | 828.38 | 238.23014  | 10.13  | Bombykol                                                                              | C16H30O     | ION=[M+H] <sup>+</sup>     |            | 4807.08  | 1351.17  | 6266.83  | 16917.00  |
| 3307 | 827.11 | 730.32011  |        |                                                                                       |             | ION=[M+H] <sup>+</sup>     |            | 2401.69  | 592.00   | 16.33    | 152.67    |
| 3308 | 828.4  | 736.57468  |        |                                                                                       |             | ION=[M+H] <sup>+</sup>     |            | 0.00     | 8279.50  | 0.00     | 0.00      |
| 3309 | 827.46 | 1040.57202 |        |                                                                                       |             | ION=[M+H+H] <sup>2+</sup>  |            | 2914.15  | 931.50   | 4493.83  | 6944.00   |
| 3310 | 829.52 | 792.49985  |        |                                                                                       |             | ION=[M+H+H] <sup>2+</sup>  |            | 1147.23  | 480.17   | 1498.17  | 0.00      |
| 3311 | 830.68 | 548.24322  | 34.646 | Bistratamide I                                                                        | C25H36N6O6S | ION=[M+H] <sup>+</sup>     |            | 6258.92  | 723.00   | 1482.33  | 4484.67   |
| 3312 | 833.31 | 294.21935  | 14.228 | 9-Oxo-10(E),12(E)-octadecadienoic acid                                                | C18H30O3    | ION=[M-H2O+H] <sup>+</sup> |            | 11337.38 | 4109.83  | 5538.17  | 13459.33  |
| 3313 | 835.11 | 294.21924  | 10.236 | 9-Oxo-10(E),12(E)-octadecadienoic acid                                                | C18H30O3    | ION=[M+H] <sup>+</sup>     |            | 23128.62 | 8357.33  | 10648.50 | 27574.00  |
| 3314 | 836.2  | 255.90937  |        |                                                                                       |             | ION=[M+H] <sup>+</sup>     |            | 2534.15  | 2188.17  | 1503.67  | 138.33    |
| 3315 | 839.35 | 688.30786  |        |                                                                                       |             | ION=[M+H] <sup>+</sup>     |            | 2288.92  | 690.17   | 0.00     | 189.00    |
| 3316 | 840.59 | 612.47714  |        |                                                                                       |             | ION=[M+H] <sup>+</sup>     |            | 1271.54  | 864.67   | 2466.33  | 0.00      |
| 3317 | 843.92 | 324.21037  |        |                                                                                       |             | ION=[M+H] <sup>+</sup>     |            | 12203.23 | 3435.50  | 13573.67 | 28049.67  |
| 3318 | 846.78 | 750.58944  |        |                                                                                       |             | ION=[M+H] <sup>+</sup>     |            | 0.00     | 9000.83  | 0.00     | 30.33     |
| 3319 | 846.92 | 830.44222  |        |                                                                                       |             | ION=[M+H+H] <sup>2+</sup>  |            | 1380.62  | 750.50   | 1930.83  | 0.00      |
| 3320 | 848.79 | 330.21667  | 19.518 | 17alpha-Hydroxyprogesterone                                                           | C21H30O3    | ION=[M+H] <sup>+</sup>     | 68-96-2    | 8763.85  | 6121.83  | 7731.33  | 4300.33   |
| 3321 | 848.9  | 538.40752  |        |                                                                                       |             | ION=[M+Na] <sup>+</sup>    |            | 4006.31  | 1161.67  | 955.50   | 495.00    |
| 3322 | 849.23 | 290.2245   | 2.487  | Androstanolone                                                                        | C19H30O2    | ION=[M+H] <sup>+</sup>     | 521-18-6   | 45972.92 | 31212.00 | 43499.83 | 52189.33  |
| 3323 | 849.7  | 792.50027  |        |                                                                                       |             | ION=[M+H+H] <sup>2+</sup>  |            | 1082.15  | 318.50   | 1667.17  | 0.00      |
| 3324 | 850.14 | 752.54756  |        |                                                                                       |             | ION=[M+H] <sup>+</sup>     |            | 918.46   | 310.83   | 1596.83  | 1595.67   |
| 3325 | 850.2  | 255.90943  |        |                                                                                       |             | ION=[M+H] <sup>+</sup>     |            | 2776.46  | 2113.00  | 1329.83  | 293.33    |
| 3326 | 851.36 | 282.21925  | 9.458  | Pseudopyronine B                                                                      | C17H30O3    | ION=[M+H] <sup>+</sup>     |            | 2700.00  | 4408.00  | 766.67   | 1305.33   |
| 3327 | 854.06 | 590.49324  |        |                                                                                       |             | ION=[M+Na] <sup>+</sup>    |            | 2235.38  | 884.33   | 3259.67  | 165.00    |
| 3328 | 852.47 | 494.38103  |        |                                                                                       |             | ION=[M+Na] <sup>+</sup>    |            | 4560.00  | 1143.33  | 1091.83  | 575.00    |
| 3329 | 854.46 | 402.2247   | 10.129 | 1,2,3-Propanetricarboxylic acid, 2-(acetyloxy)-, 1,2,3-tributyl ester                 | C20H34O8    | ION=[M+Na] <sup>+</sup>    |            | 6925.85  | 6624.33  | 6222.17  | 12244.67  |
| 3330 | 856.76 | 450.35495  | 4.968  | Poly THF n6                                                                           | C24H50O7    | ION=[M+Na] <sup>+</sup>    |            | 6718.62  | 1338.50  | 1303.00  | 1007.67   |
| 3331 | 856.56 | 738.5905   |        |                                                                                       |             | ION=[M+H] <sup>+</sup>     |            | 0.00     | 3400.33  | 0.00     | 0.00      |
| 3332 | 858.37 | 328.20106  |        |                                                                                       |             | ION=[M+H] <sup>+</sup>     |            | 10442.92 | 7610.00  | 10591.67 | 6393.33   |
| 3333 | 858.41 | 306.21925  | 10.783 | Oxandrolone   Anavar                                                                  | C19H30O3    | ION=[M+H] <sup>+</sup>     | 53-39-4    | 13623.38 | 11976.67 | 12399.17 | 15562.33  |
| 3334 | 858.94 | 830.44168  |        |                                                                                       |             | ION=[M+H+H] <sup>2+</sup>  |            | 1802.15  | 768.50   | 2117.33  | 0.00      |
| 3335 | 860.77 | 406.32869  |        |                                                                                       |             | ION=[M+Na] <sup>+</sup>    |            | 9084.46  | 1265.50  | 1346.00  | 751.67    |
| 3336 | 861.16 | 750.59081  |        |                                                                                       |             | ION=[M+H] <sup>+</sup>     |            | 0.00     | 6477.67  | 0.00     | 0.00      |



|      |        |            |        |                                                                                          |           |                           |          |          |          |          |
|------|--------|------------|--------|------------------------------------------------------------------------------------------|-----------|---------------------------|----------|----------|----------|----------|
| 3337 | 861.88 | 296.23418  |        |                                                                                          |           | ION=[M+H] <sup>+</sup>    | 2736.15  | 2851.83  | 1231.67  | 1779.67  |
| 3338 | 864.13 | 776.54463  |        |                                                                                          |           | ION=[M+H] <sup>+</sup>    | 1721.69  | 1025.33  | 2576.67  | 0.00     |
| 3339 | 863.81 | 592.50793  |        |                                                                                          |           | ION=[M+H] <sup>+</sup>    | 2138.15  | 1310.00  | 5246.00  | 416.00   |
| 3340 | 864.51 | 430.30415  |        |                                                                                          |           | ION=[M+H] <sup>+</sup>    | 1632.62  | 328.33   | 1085.83  | 448.00   |
| 3341 | 865.33 | 362.30332  |        |                                                                                          |           | ION=[M+Na] <sup>+</sup>   | 9681.85  | 1675.50  | 1506.33  | 1413.33  |
| 3342 | 865.56 | 670.29878  |        |                                                                                          |           | ION=[M+H] <sup>+</sup>    | 3081.69  | 2255.50  | 75.00    | 777.00   |
| 3343 | 869.11 | 255.90915  |        |                                                                                          |           | ION=[M+H] <sup>+</sup>    | 2591.08  | 2054.17  | 1279.17  | 591.67   |
| 3344 | 870.51 | 337.33434  | 10.234 | Erucamide                                                                                | C22H43NO  | ION=[M+H] <sup>+</sup>    | 25197.38 | 23924.50 | 17366.33 | 508.00   |
| 3345 | 871.08 | 318.2772   | 18.421 | Tridihexethyl                                                                            | C21H36NO  | ION=[M+Na] <sup>+</sup>   | 8663.85  | 1806.50  | 1751.50  | 1850.00  |
| 3346 | 873.75 | 590.49033  |        |                                                                                          |           | ION=[M+H] <sup>+</sup>    | 787.69   | 1051.00  | 1892.67  | 1577.00  |
| 3347 | 873.91 | 654.27071  |        |                                                                                          |           | ION=[M+H] <sup>+</sup>    | 5122.62  | 1364.50  | 352.17   | 1174.33  |
| 3348 | 875.28 | 430.30391  |        |                                                                                          |           | ION=[M+H] <sup>+</sup>    | 4255.85  | 636.33   | 731.67   | 2706.00  |
| 3349 | 877    | 283.90348  |        |                                                                                          |           | ION=[M+H] <sup>+</sup>    | 3840.46  | 3598.00  | 1866.17  | 416.33   |
| 3350 | 879.29 | 274.25116  |        |                                                                                          |           | ION=[M+H] <sup>+</sup>    | 3411.23  | 676.50   | 749.17   | 1668.33  |
| 3351 | 879.52 | 776.54477  |        |                                                                                          |           | ION=[M+H] <sup>+</sup>    | 1675.54  | 923.17   | 3650.50  | 508.33   |
| 3352 | 879.89 | 337.33364  | 5.154  | Erucamide                                                                                | C22H43NO  | ION=[M+H] <sup>+</sup>    | 0.00     | 0.00     | 3391.00  | 282.00   |
| 3353 | 884.59 | 592.50721  |        |                                                                                          |           | ION=[M+H] <sup>+</sup>    | 2613.85  | 1508.67  | 3842.00  | 706.67   |
| 3354 | 884.71 | 638.27566  |        |                                                                                          |           | ION=[M+H] <sup>+</sup>    | 3664.77  | 2395.00  | 473.00   | 1478.67  |
| 3355 | 887.49 | 403.31115  |        |                                                                                          |           | ION=[M+H] <sup>+</sup>    | 3109.08  | 1460.33  | 3921.00  | 3256.33  |
| 3356 | 887.98 | 774.531    |        |                                                                                          |           | ION=[M+H] <sup>+</sup>    | 1231.85  | 785.50   | 2514.67  | 2426.67  |
| 3357 | 891.43 | 337.33431  | 18.84  | Erucamide                                                                                | C22H43NO  | ION=[M+H] <sup>+</sup>    | 2039.85  | 6574.33  | 0.00     | 12887.67 |
| 3358 | 891.72 | 308.235    |        |                                                                                          |           | ION=[M+H] <sup>+</sup>    | 15309.69 | 10347.67 | 7810.83  | 12954.00 |
| 3359 | 891.19 | 796.514    |        |                                                                                          |           | ION=[M+H] <sup>+</sup>    | 1700.62  | 768.83   | 3304.00  | 2551.67  |
| 3360 | 893.63 | 612.47609  |        |                                                                                          |           | ION=[M+H] <sup>+</sup>    | 7389.38  | 2916.17  | 12375.17 | 14198.67 |
| 3361 | 891.2  | 330.21695  |        |                                                                                          |           | ION=[M+H] <sup>+</sup>    | 9996.92  | 6028.00  | 7129.50  | 5358.33  |
| 3362 | 892.35 | 183.97834  |        |                                                                                          |           | ION=[M+H] <sup>+</sup>    | 4657.54  | 4696.83  | 3693.50  | 1395.67  |
| 3363 | 896.39 | 283.90371  |        |                                                                                          |           | ION=[M+H] <sup>+</sup>    | 4116.46  | 3472.83  | 1894.67  | 561.67   |
| 3364 | 897.19 | 550.41583  |        |                                                                                          |           | ION=[M+H] <sup>+</sup>    | 1982.31  | 1463.83  | 2437.33  | 0.00     |
| 3365 | 899.12 | 698.29794  |        |                                                                                          |           | ION=[M+H] <sup>+</sup>    | 5542.77  | 1973.83  | 222.67   | 1482.67  |
| 3366 | 898.55 | 654.27127  |        |                                                                                          |           | ION=[M+H] <sup>+</sup>    | 5772.00  | 1931.67  | 763.67   | 2644.00  |
| 3367 | 897.56 | 686.29475  |        |                                                                                          |           | ION=[M+H] <sup>+</sup>    | 5594.00  | 1079.17  | 93.17    | 346.67   |
| 3368 | 898.48 | 337.33429  | 19.015 | Erucamide                                                                                | C22H43NO  | ION=[M+H] <sup>+</sup>    | 8031.69  | 9204.50  | 8349.83  | 19547.33 |
| 3369 | 898.56 | 260.8882   |        |                                                                                          |           | ION=[M+H] <sup>+</sup>    | 2128.15  | 1619.83  | 999.00   | 105.00   |
| 3370 | 898.88 | 592.50688  |        |                                                                                          |           | ION=[M+H] <sup>+</sup>    | 2478.62  | 1851.33  | 3868.83  | 1309.00  |
| 3371 | 900.2  | 810.47337  |        |                                                                                          |           | ION=[M+H+H] <sup>2+</sup> | 4104.77  | 2627.50  | 5163.50  | 470.33   |
| 3372 | 901.89 | 385.30063  |        |                                                                                          |           | ION=[M+H] <sup>+</sup>    | 1817.69  | 3889.17  | 7012.50  | 0.00     |
| 3373 | 904.92 | 183.97857  |        |                                                                                          |           | ION=[M+H] <sup>+</sup>    | 3801.38  | 3755.83  | 3419.17  | 1401.00  |
| 3374 | 905.09 | 595.37688  |        |                                                                                          |           | ION=[M+H] <sup>+</sup>    | 2820.00  | 3598.33  | 2551.17  | 3769.00  |
| 3375 | 907.89 | 670.2722   |        |                                                                                          |           | ION=[M+H] <sup>+</sup>    | 1926.92  | 237.00   | 118.67   | 289.00   |
| 3376 | 910.17 | 403.31137  |        |                                                                                          |           | ION=[M+H] <sup>+</sup>    | 24139.23 | 22812.33 | 21419.83 | 26998.33 |
| 3377 | 910.91 | 656.28462  |        |                                                                                          |           | ION=[M+H] <sup>+</sup>    | 3078.15  | 1618.67  | 97.33    | 426.67   |
| 3378 | 912.16 | 716.3081   |        |                                                                                          |           | ION=[M+H] <sup>+</sup>    | 3048.92  | 482.33   | 65.33    | 209.33   |
| 3379 | 914.23 | 550.41624  |        |                                                                                          |           | ION=[M+H] <sup>+</sup>    | 1982.31  | 1498.67  | 1677.17  | 0.00     |
| 3380 | 915    | 312.26618  |        |                                                                                          |           | ION=[M+H] <sup>+</sup>    | 2372.92  | 1687.50  | 5290.67  | 2013.67  |
| 3381 | 914.94 | 183.97844  |        |                                                                                          |           | ION=[M+H] <sup>+</sup>    | 3958.46  | 3834.17  | 2774.33  | 1565.00  |
| 3382 | 914.88 | 752.54629  |        |                                                                                          |           | ION=[M+H] <sup>+</sup>    | 411.69   | 1219.17  | 1186.00  | 194.33   |
| 3383 | 915.7  | 592.50532  |        |                                                                                          |           | ION=[M+H] <sup>+</sup>    | 2257.23  | 1682.50  | 922.33   | 98.00    |
| 3384 | 916.91 | 695.54657  |        |                                                                                          |           | ION=[M+H] <sup>+</sup>    | 3062.46  | 417.00   | 221.00   | 1351.00  |
| 3385 | 917.63 | 595.37575  |        |                                                                                          |           | ION=[M+H] <sup>+</sup>    | 4254.31  | 3249.00  | 3530.17  | 5158.67  |
| 3386 | 917.05 | 590.49161  |        |                                                                                          |           | ION=[M+H] <sup>+</sup>    | 704.15   | 2445.83  | 11305.83 | 597.33   |
| 3387 | 917.18 | 1561.00687 |        |                                                                                          |           | ION=[M+H+H] <sup>2+</sup> | 250.92   | 651.00   | 3056.17  | 477.67   |
| 3388 | 917.2  | 808.45743  |        |                                                                                          |           | ION=[M+H+H] <sup>2+</sup> | 151.85   | 1239.83  | 8351.33  | 181.00   |
| 3389 | 921.79 | 870.57106  |        |                                                                                          |           | ION=[M+H] <sup>+</sup>    | 139.69   | 1146.67  | 2809.83  | 66.67    |
| 3390 | 920.01 | 774.52904  |        |                                                                                          |           | ION=[M+H] <sup>+</sup>    | 3977.54  | 3820.33  | 8674.50  | 1126.33  |
| 3391 | 922.85 | 770.33121  |        |                                                                                          |           | ION=[M+H] <sup>+</sup>    | 6863.08  | 155.50   | 15452.17 | 30612.00 |
| 3392 | 924.54 | 668.28612  |        |                                                                                          |           | ION=[M+H] <sup>+</sup>    | 3635.69  | 1141.83  | 146.17   | 822.67   |
| 3393 | 927.31 | 183.97829  |        |                                                                                          |           | ION=[M+H] <sup>+</sup>    | 3889.23  | 4526.33  | 2583.33  | 1409.67  |
| 3394 | 925.68 | 260.88811  |        |                                                                                          |           | ION=[M+H] <sup>+</sup>    | 1517.85  | 1693.33  | 464.83   | 91.67    |
| 3395 | 924.38 | 810.47052  |        |                                                                                          |           | ION=[M+H+H] <sup>2+</sup> | 2192.31  | 2977.00  | 2564.67  | 2158.33  |
| 3396 | 925.05 | 752.54628  | 16.475 | (2S)-3-O-?-D-galactopyranosyl-1-O-(9Z,12Z-octadecadienoyl)-2-O-(4Z-hexadecenoyl)glycerol | C43H76O10 | ION=[M+H] <sup>+</sup>    | 1550.15  | 1195.17  | 2352.33  | 256.33   |
| 3397 | 926.59 | 312.26642  | 19.23  | Ricinoleic acid methyl ester                                                             | C19H36O3  | ION=[M+H] <sup>+</sup>    | 2999.85  | 3078.50  | 3780.33  | 3595.00  |
| 3398 | 925.34 | 849.48484  |        |                                                                                          |           | ION=[M+H+H] <sup>2+</sup> | 1773.23  | 2217.00  | 2010.33  | 147.00   |
| 3399 | 926.33 | 588.42228  |        |                                                                                          |           | ION=[M+H] <sup>+</sup>    | 2394.77  | 910.17   | 843.83   | 146.00   |
| 3400 | 927.85 | 592.5069   |        |                                                                                          |           | ION=[M+H] <sup>+</sup>    | 1477.23  | 2398.17  | 1854.33  | 4442.67  |
| 3401 | 929.06 | 334.25074  |        |                                                                                          |           | ION=[M+H] <sup>+</sup>    | 1553.85  | 1092.33  | 1970.50  | 58.00    |
| 3402 | 929.25 | 808.45749  |        |                                                                                          |           | ION=[M+H+H] <sup>2+</sup> | 12351.85 | 9160.50  | 8162.33  | 142.33   |
| 3403 | 929.1  | 590.49163  |        |                                                                                          |           | ION=[M+H] <sup>+</sup>    | 14696.15 | 9148.17  | 9661.17  | 1810.67  |
| 3404 | 928.98 | 992.63404  |        |                                                                                          |           | ION=[M+H+H] <sup>2+</sup> | 4436.62  | 969.67   | 1022.33  | 1273.67  |
| 3405 | 930.01 | 683.54843  |        |                                                                                          |           | ION=[M+H] <sup>+</sup>    | 1800.00  | 146.67   | 12.33    | 204.33   |
| 3406 | 928.67 | 682.30269  |        |                                                                                          |           | ION=[M+H] <sup>+</sup>    | 15843.69 | 6178.00  | 902.00   | 5157.67  |
| 3407 | 930.08 | 283.90388  |        |                                                                                          |           | ION=[M+H] <sup>+</sup>    | 2692.00  | 3087.33  | 1355.50  | 587.33   |
| 3408 | 930.25 | 612.25945  | 15.161 | Roseopurpurin H                                                                          | C33H40O11 | ION=[M+H] <sup>+</sup>    | 2162.62  | 367.50   | 242.83   | 3968.67  |
| 3409 | 930.88 | 649.42974  |        |                                                                                          |           | ION=[M+H] <sup>+</sup>    | 1864.31  | 6521.67  | 1195.00  | 1366.67  |

|      |        |            |        |               |            |                                         |          |          |          |          |
|------|--------|------------|--------|---------------|------------|-----------------------------------------|----------|----------|----------|----------|
| 3410 | 930.31 | 670.2703   |        |               |            | ION=[M+H] <sup>+</sup>                  | 1439.38  | 401.00   | 102.67   | 734.67   |
| 3411 | 932.7  | 642.4695   |        |               |            | ION=[M+H] <sup>+</sup>                  | 1694.92  | 2422.00  | 2175.17  | 3696.00  |
| 3412 | 932.55 | 616.29066  | 7.586  | YM-47524      | C33H44O11  | ION=[M+H] <sup>+</sup>                  | 4753.08  | 3646.67  | 299.00   | 1239.00  |
| 3413 | 933.93 | 676.39944  |        |               |            | ION=[M+H+H] <sup>2+</sup>               | 2452.00  | 3442.67  | 2307.17  | 3515.33  |
| 3414 | 934.36 | 618.47113  |        |               |            | ION=[M+H] <sup>+</sup>                  | 9043.38  | 10039.67 | 18049.33 | 14804.67 |
| 3415 | 934.12 | 1561.00567 |        |               |            | ION=[M+H+H] <sup>2+</sup>               | 3919.08  | 2310.83  | 3912.67  | 220.00   |
| 3416 | 935.43 | 624.26094  |        |               |            | ION=[M+H] <sup>+</sup>                  | 3025.23  | 316.33   | 717.50   | 1167.33  |
| 3417 | 932.74 | 774.52999  |        |               |            | ION=[M+H] <sup>+</sup>                  | 2798.00  | 1458.33  | 1717.00  | 687.00   |
| 3418 | 935.4  | 695.54818  |        |               |            | ION=[M+H] <sup>+</sup>                  | 2243.23  | 106.67   | 110.33   | 51.33    |
| 3419 | 935.22 | 698.29772  |        |               |            | ION=[M+H] <sup>+</sup>                  | 8613.85  | 3861.33  | 23.00    | 1006.33  |
| 3420 | 936.73 | 849.48555  |        |               |            | ION=[M+H+H] <sup>2+</sup>               | 3350.92  | 2291.17  | 2767.17  | 9.33     |
| 3421 | 937.2  | 620.4866   |        |               |            | ION=[M+H] <sup>+</sup>                  | 40632.77 | 48455.83 | 48107.50 | 71124.33 |
| 3422 | 937.69 | 784.47798  |        |               |            | ION=[M+H] <sup>+</sup>                  | 1252.92  | 269.17   | 3868.67  | 1993.67  |
| 3423 | 938.91 | 870.57036  |        |               |            | ION=[M+H] <sup>+</sup>                  | 110.15   | 1164.83  | 3084.00  | 79.00    |
| 3424 | 940.84 | 595.37631  |        |               |            | ION=[M+H] <sup>+</sup>                  | 3457.08  | 3166.83  | 3241.33  | 3102.00  |
| 3425 | 939.34 | 590.49244  |        |               |            | ION=[M+H] <sup>+</sup>                  | 2356.92  | 258.17   | 868.50   | 191.00   |
| 3426 | 940.2  | 652.28921  |        |               |            | ION=[M+H] <sup>+</sup>                  | 2644.00  | 1564.00  | 83.33    | 498.00   |
| 3427 | 941.21 | 628.41703  |        |               |            | ION=[M+H] <sup>+</sup>                  | 2314.92  | 458.83   | 1312.33  | 2449.67  |
| 3428 | 940.92 | 612.25933  |        |               |            | ION=[M+H] <sup>+</sup>                  | 4222.31  | 429.17   | 162.17   | 2652.00  |
| 3429 | 940.92 | 744.48463  |        |               |            | ION=[M+H] <sup>+</sup>                  | 6196.15  | 1508.33  | 19596.67 | 10268.33 |
| 3430 | 942.33 | 649.42979  |        |               |            | ION=[M+H] <sup>+</sup>                  | 748.92   | 3360.50  | 146.00   | 0.00     |
| 3431 | 943.38 | 683.54849  |        |               |            | ION=[M+H] <sup>+</sup>                  | 1610.62  | 149.33   | 12.83    | 0.00     |
| 3432 | 944.56 | 390.33295  |        |               |            | ION=[M+Na] <sup>+</sup>                 | 4400.46  | 1303.83  | 1132.83  | 847.33   |
| 3433 | 944.73 | 992.63513  |        |               |            | ION=[M+H+H] <sup>2+</sup>               | 4423.08  | 1209.83  | 903.50   | 1403.33  |
| 3434 | 946.38 | 427.34741  |        |               |            | ION=[M+H] <sup>+</sup>                  | 3130.62  | 3656.17  | 2769.50  | 5843.67  |
| 3435 | 947.97 | 730.3242   |        |               |            | ION=[M-H <sub>2</sub> O+H] <sup>+</sup> | 3786.15  | 3765.33  | 84.50    | 858.67   |
| 3436 | 946.53 | 744.48499  |        |               |            | ION=[M+H] <sup>+</sup>                  | 3204.92  | 845.17   | 9859.67  | 5821.33  |
| 3437 | 946.71 | 618.4699   |        |               |            | ION=[M+H] <sup>+</sup>                  | 944.15   | 842.00   | 2594.83  | 804.00   |
| 3438 | 946.68 | 668.41334  |        |               |            | ION=[M+H] <sup>+</sup>                  | 3089.23  | 1358.00  | 3501.33  | 2039.00  |
| 3439 | 948.74 | 445.35775  |        |               |            | ION=[M+H] <sup>+</sup>                  | 3934.46  | 4205.83  | 4096.00  | 6832.33  |
| 3440 | 951.63 | 346.30721  |        |               |            | ION=[M+Na] <sup>+</sup>                 | 4698.62  | 1247.83  | 1178.33  | 1026.33  |
| 3441 | 952.3  | 577.36536  |        |               |            | ION=[M+H] <sup>+</sup>                  | 7135.54  | 7261.17  | 6559.33  | 11454.67 |
| 3442 | 951.63 | 668.28688  |        |               |            | ION=[M+H] <sup>+</sup>                  | 5167.54  | 1347.00  | 293.33   | 841.33   |
| 3443 | 950.38 | 682.30217  |        |               |            | ION=[M+H] <sup>+</sup>                  | 5825.85  | 6014.33  | 626.50   | 2312.33  |
| 3444 | 952.36 | 590.49105  |        |               |            | ION=[M+H] <sup>+</sup>                  | 3937.38  | 4612.67  | 4948.33  | 8779.00  |
| 3445 | 951.51 | 808.45915  |        |               |            | ION=[M+H+H] <sup>2+</sup>               | 1195.23  | 3406.67  | 2769.67  | 2084.33  |
| 3446 | 951.07 | 620.48742  |        |               |            | ION=[M+H] <sup>+</sup>                  | 8054.92  | 3034.00  | 20019.00 | 565.67   |
| 3447 | 950.83 | 676.40027  |        |               |            | ION=[M+H+H] <sup>2+</sup>               | 2745.85  | 3199.00  | 4203.00  | 202.33   |
| 3448 | 952.14 | 283.90359  |        |               |            | ION=[M+H] <sup>+</sup>                  | 2712.92  | 3099.67  | 1145.50  | 262.00   |
| 3449 | 952.75 | 595.37603  |        |               |            | ION=[M+H] <sup>+</sup>                  | 5104.77  | 4901.33  | 4261.33  | 7079.33  |
| 3450 | 953.17 | 670.29833  |        |               |            | ION=[M+H] <sup>+</sup>                  | 5062.62  | 2652.33  | 303.33   | 1144.67  |
| 3451 | 953.98 | 642.27053  |        |               |            | ION=[M+H] <sup>+</sup>                  | 3914.62  | 298.33   | 455.33   | 2458.00  |
| 3452 | 954    | 700.31129  | 10.546 | Tolyporphin B | C38H44N4O9 | ION=[M+H] <sup>+</sup>                  | 1684.15  | 440.67   | 14.33    | 186.67   |
| 3453 | 954.7  | 652.26239  |        |               |            | ION=[M+H] <sup>+</sup>                  | 3860.00  | 128.33   | 304.67   | 1483.67  |
| 3454 | 969.58 | 590.49173  |        |               |            | ION=[M+H] <sup>+</sup>                  | 3502.15  | 2348.50  | 3750.50  | 1208.33  |
